# Supplementary material for: Systematic Profiling of Essential Fungal Transcription Factors Uncovers Ezt1 as a Central Pathobiological and Morphogenic Regulator in Cryptococcus neoformans
Source: Research Square preprint supplement (doi:10.21203/rs.3.rs-9581746/v1), 2026-06-02
Supplement: Supplementary file 2 [file 4a0189acf92ca826c62bc6e4.xlsx]

## Sheet: Genes upregulated by EZT1oe
Supplementary Data 2. RNA sequencing data for transcriptome analysis of EZT1, EZT2, or CBF1 overexpression strains compared with the wild-type strain.
Genes that met the criteria of adjusted p-value (Padj) ≤ 0.05 and |log2FoldChange| ≥ 1 were identified. In the EZT1oe strain, a total of 1,064 genes were upregulated, while 200 genes were downregulated. For the EZT2oe strain, 134 genes showed differential expression (73 upregulated and 61 downregulated), whereas in the CBF1oe strains, 58 genes were differentially expressed (53 upregulated and 5 d…
Locus_tag	Gene_name	Function	H99_1	H99_2	H99_3	EZT1_1	EZT1_2	EZT1_3	padj	log2FoldChange	pvalue	stat	foldChange	log10padj
CNAG_12813	-	unspecified product	0	0	0	121	119	127	1.53e-30	8.86777	3.33e-32	139.555	467.16	29.8152
CNAG_06133	-	hypothetical protein	0	0	0	116	101	120	4.2e-28	8.74184	1.03e-29	128.17	428.111	27.3773
CNAG_12396	-	unspecified product	14	7	12	4093	3535	4534	0	8.01076	0	1678.82	257.916
CNAG_12183	-	unspecified product	0	0	6	525	428	491	5.89662e-06	7.3994	1.33187e-06	23.3766	168.827	5.2294
CNAG_03087	-	Maltose permease	6	5	10	1484	1374	1644	2.04e-222	7.23102	7.51e-226	1029.34	150.229	221.691
CNAG_12502	-	unspecified product	0	3	2	331	287	388	1.62e-66	7.13547	9.14e-69	307.146	140.602	65.7916
CNAG_07874	-	Sugar transporter	1	1	1	148	145	183	7.85e-35	6.79485	1.38e-36	159.606	111.033	34.1054
CNAG_02526	-	hypothetical protein	4	5	10	1041	869	675	8.06e-82	6.58881	3.37e-84	378.012	96.2561	81.0934
CNAG_01527	-	hypothetical protein	9	5	2	781	615	733	1.01e-108	6.54415	1.87e-111	503.246	93.3221	107.994
CNAG_13074	-	unspecified product	1	0	2	132	121	129	7.64e-28	6.48338	1.95e-29	126.908	89.4729	27.1166
CNAG_13034	-	unspecified product	0	0	0	15	12	36	2.36784e-05	6.29122	5.95381e-06	20.503	78.3154	4.62565
CNAG_05580	-	hypothetical protein	8	11	18	1125	1086	1221	1.16e-161	6.02411	8.59e-165	748.48	65.0786	160.934
CNAG_12049	-	unspecified product	0	0	0	22	10	6	0.00124816	5.61091	0.000444906	12.3335	48.871	2.90373
CNAG_04442	-	hypothetical protein, variant	10	1	5	356	325	428	2.06e-58	5.59975	1.47e-60	269.49	48.4944	57.6871
CNAG_01606	-	hypothetical protein	0	0	0	20	7	11	0.00100806	5.59117	0.000351264	12.7751	48.2071	2.99652
CNAG_12896	-	unspecified product	0	0	1	25	22	25	5.73428e-06	5.55472	1.29309e-06	23.4335	47.0042	5.24152
CNAG_01873	-	hypothetical protein	0	2	0	41	46	42	2.56e-09	5.50504	3.37e-10	39.4457	45.4133	8.59111
CNAG_12356	-	unspecified product	2	2	7	229	189	245	7.33e-39	5.39839	1.08e-40	178.404	42.177	38.1351
CNAG_12589	-	unspecified product	0	0	0	19	3	10	0.00452602	5.33368	0.00183246	9.71022	40.3272	2.34428
CNAG_00568	-	hypothetical protein	107	68	75	4630	4724	3946	8.72e-144	5.23313	9.65e-147	665.471	37.6123	143.059
CNAG_12590	-	unspecified product	0	0	1	20	15	22	9.42798e-05	5.21056	2.65579e-05	17.6495	37.0284	4.02558
CNAG_13023	-	unspecified product	0	2	0	43	24	37	3.93e-07	5.18128	7.29e-08	28.9861	36.2844	6.40542
CNAG_00452	-	Isovaleryl-CoA dehydrogenase	52	33	47	2055	2244	2339	9.3e-181	5.14369	4.57e-184	837.127	35.3512	180.032
CNAG_05305	-	hypothetical protein	2	5	1	134	91	174	1.13e-20	5.113	4.34e-22	93.3689	34.6071	19.9478
CNAG_13012	-	unspecified product	0	0	0	8	7	12	0.00551004	5.08793	0.0022696	9.31763	34.0111	2.25884
CNAG_13005	-	unspecified product	3	2	3	138	88	149	2.74e-21	5.02917	1.04e-22	96.2064	32.6536	20.5619
CNAG_06911	-	hypothetical protein	0	0	0	10	3	13	0.00960216	5.01621	0.00423024	8.18224	32.3615	2.01763
CNAG_00269	-	Sorbitol dehydrogenase	28	6	12	690	703	648	1.18e-55	4.96873	9e-58	256.698	31.3138	54.9278
CNAG_12907	-	unspecified product	0	0	0	13	10	0	0.0393193	4.91721	0.0207305	5.34931	30.2153	1.40539
CNAG_02146	-	hypothetical protein	0	0	0	5	3	16	0.0159309	4.8835	0.00742578	7.16698	29.5176	1.79776
CNAG_12586	-	unspecified product	3	4	2	133	124	101	2.47e-20	4.81241	9.98e-22	91.7211	28.0983	19.6065
CNAG_07722	-	pumilio domain-containing protein c	0	0	0	12	4	6	0.0159948	4.80424	0.00746149	7.15837	27.9395	1.79602
CNAG_12220	-	unspecified product	0	0	0	4	4	14	0.0195221	4.76597	0.00931097	6.76219	27.2081	1.70947
CNAG_05279	-	hypothetical protein	29	17	35	1175	908	1042	7.03e-94	4.7595	1.99e-96	434.193	27.0865	93.1532
CNAG_12969	-	unspecified product	0	5	2	109	81	79	2.27e-14	4.75669	1.58e-15	63.5346	27.0338	13.6435
CNAG_12001	-	unspecified product	10	20	5	384	396	578	1.56e-44	4.75632	1.93e-46	204.737	27.0269	43.8078
CNAG_04116	-	hypothetical protein, variant	8	4	16	367	382	312	2.13e-40	4.74317	2.94e-42	185.578	26.7816	39.6713
CNAG_12127	-	unspecified product	1	1	4	54	62	113	9.53e-12	4.72493	8.89e-13	51.0759	26.4452	11.0207
CNAG_05528	-	hypothetical protein	20	10	13	598	432	584	1.82e-64	4.71516	1.1e-66	297.599	26.2667	63.7392
CNAG_12070	-	unspecified product	0	0	1	8	16	15	0.00250758	4.67427	0.000960729	10.9018	25.5326	2.60075
CNAG_05662	PTP1	Polyol transporter protein 1	52	43	22	1382	1369	1353	8.13e-93	4.62605	2.6e-95	429.064	24.6933	92.0901
CNAG_05299	-	oxidoreductase	7	12	32	668	577	540	3.91e-38	4.62397	5.96e-40	175.007	24.6577	37.4076
CNAG_07042	-	hypothetical protein	0	0	0	7	1	12	0.0350398	4.62136	0.0181554	5.58109	24.6131	1.45544
CNAG_12279	-	unspecified product	0	0	0	5	9	5	0.023738	4.61581	0.0116778	6.35914	24.5186	1.62456
CNAG_07976	-	hypothetical protein	25	18	31	858	693	938	1.81e-91	4.55573	6.46e-94	422.652	23.5186	90.7418
CNAG_02253	-	hypothetical protein	0	0	0	6	9	3	0.0303595	4.54966	0.0153906	5.87119	23.4198	1.51771
CNAG_02660	-	hypothetical protein	6	5	7	239	143	204	2.3e-27	4.50897	5.95e-29	124.69	22.7685	26.6374
CNAG_13135	-	unspecified product	5	5	12	225	236	245	2.31e-35	4.49517	3.97e-37	162.08	22.5518	34.6367
CNAG_12365	-	unspecified product	6	7	11	273	225	254	1.52e-38	4.45888	2.29e-40	176.908	21.9916	37.8191
CNAG_01514	-	hypothetical protein	0	0	0	11	4	2	0.0432676	4.45239	0.0230675	5.16341	21.8929	1.36384
CNAG_06731	-	hypothetical protein	0	0	3	41	19	34	1.86408e-05	4.44883	4.59774e-06	20.998	21.8389	4.72954
CNAG_07920	-	hypothetical protein	0	0	0	6	5	6	0.0338019	4.4326	0.0174317	5.65238	21.5946	1.47106
CNAG_12182	-	unspecified product	6	6	3	176	133	151	1.94e-24	4.42822	6.03e-26	110.964	21.5292	23.7111
CNAG_12289	-	unspecified product	1	0	2	26	30	35	3.92851e-06	4.41035	8.62e-07	24.2147	21.2641	5.40577
CNAG_12637	-	unspecified product	2	5	7	130	110	184	1.95e-20	4.39621	7.63e-22	92.252	21.0567	19.7109
CNAG_12743	-	unspecified product	0	0	0	5	9	2	0.0465216	4.38876	0.0249911	5.0245	20.9483	1.33235
CNAG_12204	-	unspecified product	0	0	2	25	20	14	0.000423799	4.38511	0.000135743	14.5603	20.8953	3.37284
CNAG_05785	STB4	putative transcription factor	9	9	2	196	196	196	1.81e-28	4.37029	4.32e-30	129.897	20.6818	27.7431
CNAG_02226	-	hypothetical protein	214	195	204	6292	5554	6103	1.71e-274	4.36211	4.22e-278	1269.76	20.5649	273.766
CNAG_07779	TDA10	D-glycerate 3-kinase	59	56	52	1470	1631	1781	7.23e-146	4.35895	7.12e-149	675.276	20.5199	145.141
CNAG_12193	-	unspecified product	0	0	0	5	6	5	0.0403343	4.35538	0.0213401	5.29881	20.4691	1.39433
CNAG_00132	-	hypothetical protein, variant	92	103	145	3307	3442	3091	5.89e-114	4.35109	8.69e-117	527.756	20.4084	113.23
CNAG_04142	NBT4	tartrate transporter	294	155	248	7307	6930	5607	1.57e-75	4.3331	7.72e-78	348.804	20.1555	74.8042
CNAG_02118	-	hypothetical protein	5	2	5	100	100	140	3.33e-18	4.3064	1.53e-19	81.771	19.7859	17.4773
CNAG_07910	-	hypothetical protein	2	0	0	20	6	31	0.00195853	4.28816	0.000733517	11.4023	19.5372	2.70807
CNAG_07707	-	glycoside hydrolase family 3 domain-containing protein	58	46	53	1414	1325	1639	2.07e-146	4.28748	1.78e-149	678.045	19.5281	145.685
CNAG_02602	-	flavonol synthase	163	155	143	4549	4210	3945	1.28e-171	4.27967	7.86e-175	794.649	19.4226	170.893
CNAG_06347	BLP2	pr4/barwin domain protein	266	280	242	9118	5907	6391	1.3e-104	4.25612	2.73e-107	484.11	19.1082	103.885
CNAG_12602	-	unspecified product	2	1	4	59	51	75	1.42e-10	4.20501	1.57e-11	45.4428	18.4431	9.8488
CNAG_12883	-	unspecified product	1	5	0	45	44	67	6.09e-08	4.17714	9.94e-09	32.8527	18.0903	7.21551
CNAG_12404	-	unspecified product	0	0	2	22	10	20	0.00146583	4.17666	0.000533307	11.9954	18.0842	2.83392
CNAG_02125	-	hypothetical protein, variant	38	27	54	1014	935	1081	6.22e-87	4.15876	2.52e-89	401.556	17.8612	86.2061
CNAG_01506	-	hypothetical protein	62	50	67	1627	1292	1586	1.1e-121	4.14065	1.49e-124	563.45	17.6384	120.957
CNAG_07850	-	hypothetical protein	0	0	2	26	19	4	0.00587756	4.13743	0.00243874	9.18599	17.5991	2.2308
CNAG_05387	-	galactose transporter	683	1253	512	19516	23102	18252	5.14e-16	4.13437	3.05e-17	71.314	17.5618	15.289
CNAG_06557	-	membrane protein	25	29	24	588	598	703	1.57e-79	4.085	7.14e-82	367.328	16.9709	78.804
CNAG_01612	PSK202	CAMK/CAMKL protein kinase, variant	118	62	90	2206	1998	2069	8e-89	4.03143	3.05e-91	410.368	16.3524	88.0971
CNAG_12403	-	unspecified product	0	8	1	68	53	84	5.11e-08	3.98476	8.28e-09	33.2089	15.8319	7.29145
CNAG_10070	-	unspecified product	0	2	0	24	11	8	0.00695835	3.92492	0.00295514	8.83496	15.1887	2.15749
CNAG_06263	-	hypothetical protein, variant	4	6	10	158	94	182	6.04e-17	3.91349	3.14e-18	75.7971	15.0687	16.2189
CNAG_03650	-	hypothetical protein	32	12	14	529	291	419	1.34e-26	3.90304	3.64e-28	121.098	14.96	25.8715
CNAG_12419	-	unspecified product	4	11	15	225	162	252	2.56e-23	3.89163	8.44e-25	105.733	14.8421	22.5917
CNAG_00870	-	hypothetical protein, variant 2	18	13	8	332	224	261	3.63e-29	3.87871	8.47e-31	133.129	14.7098	28.4406
CNAG_01538	-	hypothetical protein	102	45	116	1835	1796	1788	4.74e-48	3.85954	5.01e-50	221.175	14.5157	47.3241
CNAG_00827	-	ribose 5-phosphate isomerase	20	12	8	364	162	305	2.27e-20	3.8556	9.1e-22	91.9035	14.4761	19.6439
CNAG_12343	-	unspecified product	2	0	2	33	10	41	0.000299048	3.85343	9.31378e-05	15.271	14.4544	3.52426
CNAG_07984	-	hypothetical protein	5	0	0	31	28	44	6.8763e-05	3.84614	1.88627e-05	18.3008	14.3815	4.16265
CNAG_02217	CHS7	Chitin synthase	200	157	251	4706	3828	3824	5.75e-89	3.83927	2.12e-91	411.092	14.3131	88.2405
CNAG_06259	-	MFS transporter, SP family, general alpha glucoside:H symporter	39	43	48	966	746	839	1.79e-75	3.78414	9.01e-78	348.496	13.7766	74.7479
CNAG_12560	-	unspecified product	3	4	1	44	42	71	4.99e-08	3.76955	8.05e-09	33.2629	13.6379	7.30187
CNAG_12111	-	unspecified product	3	5	12	123	126	139	1.58e-16	3.76677	8.78e-18	73.7703	13.6117	15.8006
CNAG_01862	-	hexose transporter	39	23	38	599	615	711	1.82e-64	3.75508	1.08e-66	297.636	13.5018	63.7392
CNAG_12682	-	unspecified product	2	1	7	72	60	58	8.85e-09	3.74214	1.26e-09	36.8674	13.3812	8.05307
CNAG_03980	-	hypothetical protein, variant	17	10	10	259	217	223	4.5e-29	3.73255	1.06e-30	132.688	13.2926	28.3463
CNAG_12875	-	unspecified product	11	4	6	138	98	163	1.99e-16	3.72699	1.12e-17	73.2918	13.2415	15.7011
CNAG_12264	-	unspecified product	14	6	2	110	135	169	5.48e-14	3.71975	3.95e-15	61.724	13.1752	13.2609
CNAG_04416	-	major facilitator superfamily transporter	102	64	62	1474	1412	1365	1.34e-74	3.71575	6.91e-77	344.433	13.1387	73.8734
CNAG_04454	-	hypothetical protein	17	7	5	207	166	162	1.33e-18	3.70087	5.95e-20	83.6369	13.0038	17.8755
CNAG_05129	-	hypothetical protein	41	24	45	680	604	713	6.06e-61	3.67053	3.95e-63	281.281	12.7332	60.2175
CNAG_05992	-	hypothetical protein	19	32	54	732	580	586	2.09e-33	3.66827	3.88e-35	152.975	12.7134	32.68
CNAG_03733	-	hypothetical protein	117	116	133	2142	2201	2204	4.09e-140	3.65347	5.03e-143	648.38	12.5836	139.388
CNAG_07819	CEN4	hypothetical protein	13	24	6	291	177	303	4.53e-19	3.64085	1.98e-20	85.8138	12.474	18.344
CNAG_02053	-	hypothetical protein	24	14	26	387	331	402	3.99e-42	3.61675	5.15e-44	193.624	12.2673	41.3995
CNAG_12995	-	unspecified product	24	33	27	485	413	545	2.33e-53	3.58634	1.98e-55	245.955	12.0115	52.6323
CNAG_12893	-	unspecified product	6	3	6	83	78	95	1.08e-12	3.58011	8.81e-14	55.617	11.9597	11.9678
CNAG_13167	-	unspecified product	0	2	0	11	11	12	0.0157408	3.57405	0.00732943	7.19041	11.9096	1.80297
CNAG_04610	-	hypothetical protein	11	0	2	84	65	69	8.77e-07	3.56363	1.71e-07	27.3312	11.8239	6.05709
CNAG_06609	-	hypothetical protein	3	6	4	73	73	72	5.69e-11	3.55979	6.01e-12	47.3278	11.7924	10.2452
CNAG_01806	-	hypothetical protein	0	2	2	24	9	35	0.00146756	3.54351	0.000534479	11.9914	11.6601	2.8334
CNAG_02521	-	hypothetical protein	0	2	0	21	3	9	0.036864	3.52055	0.0192365	5.47988	11.476	1.4334
CNAG_12889	-	unspecified product	0	2	0	10	12	10	0.0213163	3.49436	0.0102873	6.58446	11.2696	1.67129
CNAG_01776	-	2,4-dihydroxyhept-2-ene-1,7-dioic acid aldolase	277	233	195	3897	3614	3671	9.63e-113	3.48044	1.54e-115	522.019	11.1613	112.016
CNAG_12711	-	unspecified product	2	0	2	18	21	23	0.000881636	3.4447	0.000302768	13.0532	10.8882	3.05471
CNAG_00898	-	multidrug efflux pump	2	0	0	8	10	13	0.0256997	3.44054	0.0127693	6.2008	10.8569	1.59007
CNAG_02934	-	hypothetical protein, variant	52	71	61	1018	712	1131	1.02e-56	3.43714	7.54e-59	261.637	10.8314	55.9903
CNAG_12291	-	unspecified product	6	7	5	73	112	91	8.86e-12	3.43667	8.19e-13	51.2358	10.8278	11.0526
CNAG_12402	-	unspecified product	4	2	4	45	62	45	2.03e-07	3.42833	3.6e-08	30.3562	10.7654	6.69325
CNAG_12164	-	unspecified product	0	2	2	18	24	19	0.00109617	3.428	0.000387091	12.5935	10.7629	2.96012
CNAG_01714	-	sulfonate dioxygenase	33	25	24	415	362	477	1.15e-45	3.41932	1.37e-47	210.002	10.6984	44.9391
CNAG_12774	-	unspecified product	5	0	1	42	22	27	0.00036409	3.41554	0.000115051	14.8721	10.6704	3.43879
CNAG_06009	-	cyclohydrolase	89	87	109	1439	1342	1529	4.91e-110	3.40722	8.46e-113	509.426	10.6091	109.309
CNAG_04915	-	hypothetical protein	9	8	13	147	137	165	1.04e-19	3.39056	4.42e-21	88.7747	10.4872	18.9817
CNAG_02225	EXG104	glucan 1,3-beta-glucosidase	82	107	122	1903	1273	1342	1.06e-49	3.35255	1.04e-51	228.883	10.2145	48.9738
CNAG_07854	-	hypothetical protein	0	1	1	14	5	10	0.0299935	3.33548	0.015194	5.89383	10.0944	1.52297
CNAG_13194	-	unspecified product	0	0	3	13	8	23	0.0158993	3.33518	0.00740715	7.17148	10.0923	1.79862
CNAG_05938	-	hypothetical protein	12	20	32	235	257	437	3.32e-19	3.33179	1.44e-20	86.4414	10.0686	18.4793
CNAG_12095	-	unspecified product	13	6	10	147	114	154	9.11e-17	3.324	4.86e-18	74.9353	10.0144	16.0402
CNAG_02339	-	hypothetical protein	11	11	18	195	184	189	1.14e-22	3.31952	3.97e-24	102.665	9.98332	21.9413
CNAG_00939	-	glucan 1,3-beta-glucosidase	2	1	10	67	53	64	1.29441e-06	3.31073	2.6e-07	26.5292	9.92272	5.88793
CNAG_06870	-	hypothetical protein	95	100	120	1529	1325	1604	1.65e-102	3.30974	3.85e-105	474.229	9.91584	101.783
CNAG_12157	-	unspecified product	3	2	1	35	21	27	0.000164543	3.27789	4.86163e-05	16.5013	9.69934	3.78372
CNAG_07367	-	amino acid transporter, variant	62	43	71	802	743	875	9.81e-62	3.26938	6.27e-64	284.948	9.64229	61.0085
CNAG_06302	-	hypothetical protein, variant	85	80	70	1078	977	1167	1.09e-91	3.26447	3.74e-94	423.742	9.60958	90.964
CNAG_01193	-	hypothetical protein, variant	37	26	68	469	523	809	2.06e-23	3.25796	6.76e-25	106.172	9.56632	22.6851
CNAG_06873	-	5-oxoprolinase	70	83	62	1067	871	977	1.72e-69	3.25043	9.1e-72	320.926	9.51651	68.764
CNAG_00908	-	hypothetical protein	6	0	2	36	32	38	0.000114335	3.21853	3.26992e-05	17.2541	9.30839	3.94182
CNAG_12487	-	unspecified product	3	1	3	31	26	36	6.09636e-05	3.21573	1.65508e-05	18.55	9.29032	4.21493
CNAG_05099	-	hypothetical protein	0	0	3	17	8	15	0.0215475	3.21463	0.0104306	6.55983	9.28326	1.6666
CNAG_07390	-	hypothetical protein	7	2	6	51	63	85	3.69e-08	3.21257	5.84e-09	33.8883	9.27	7.43349
CNAG_12673	-	unspecified product	18	8	14	176	170	181	8.17e-20	3.21129	3.42e-21	89.2856	9.26179	19.0875
CNAG_05325	-	hypothetical protein	95	124	95	1226	1313	1586	3.83e-77	3.20088	1.79e-79	356.312	9.19523	76.4169
CNAG_07723	-	hypothetical protein	6	2	7	85	47	64	1.03e-07	3.19487	1.75e-08	31.7568	9.15699	6.98567
CNAG_01272	-	hypothetical protein	1596	912	1080	20482	13105	12900	1.87e-16	3.19238	1.04e-17	73.4289	9.14121	15.7284
CNAG_05330	-	MFS transporter, SP family, general alpha glucoside:H symporter	11	4	6	82	83	108	5.68e-11	3.1856	6e-12	47.3309	9.09835	10.2454
CNAG_13125	-	unspecified product	5	4	5	64	58	59	1.24e-08	3.1848	1.81e-09	36.1639	9.09326	7.90665
CNAG_07577	-	hypothetical protein	2	4	0	19	23	36	0.000886539	3.17556	0.000304778	13.0408	9.0352	3.0523
CNAG_07831	-	hypothetical protein	45	37	55	534	538	694	1.08e-48	3.17248	1.11e-50	224.183	9.01595	47.9649
CNAG_00840	-	hypothetical protein	103	132	117	1447	1476	1584	8.07e-96	3.16824	2.08e-98	443.288	8.98953	95.0931
CNAG_03971	-	hypothetical protein	0	0	4	24	9	18	0.0158415	3.15035	0.0073783	7.17849	8.87874	1.8002
CNAG_07380	-	hypothetical protein	4	2	3	44	27	43	1.48554e-05	3.14454	3.61477e-06	21.459	8.84305	4.82811
CNAG_03398	ZIP2	solute carrier family 39 (zinc transporter), member 1/2/3	44	23	13	401	290	306	1.77e-17	3.13346	8.61e-19	78.3539	8.77539	16.7511
CNAG_05300	-	mitochondrial carrier protein	293	204	249	3323	2753	3249	2.93e-92	3.13272	9.73e-95	426.429	8.77086	91.533
CNAG_06503	-	uridine permease, variant	8	6	7	100	85	76	6.24e-11	3.13196	6.6e-12	47.1416	8.76626	10.205
CNAG_12644	-	unspecified product	3	0	1	12	24	13	0.00898771	3.1288	0.00392971	8.31601	8.74709	2.04635
CNAG_01719	-	hypothetical protein	64	34	47	653	537	613	4.98e-41	3.12652	6.74e-43	188.506	8.73325	40.3028
CNAG_12648	-	unspecified product	3	0	1	15	11	24	0.00799912	3.11573	0.00345714	8.54899	8.66818	2.09696
CNAG_12117	-	unspecified product	23	9	15	165	168	247	5.97e-17	3.10617	3.09e-18	75.8312	8.61091	16.2241
CNAG_05988	-	hypothetical protein	5	1	2	33	51	11	0.00146685	3.10341	0.000533861	11.9935	8.59447	2.83361
CNAG_12977	-	unspecified product	13	10	13	134	132	173	2.11e-17	3.09225	1.04e-18	77.9759	8.52822	16.6757
CNAG_07789	-	hypothetical protein	2	0	1	6	14	16	0.0242818	3.07286	0.0119812	6.31365	8.41439	1.61472
CNAG_05334	-	hypothetical protein	16	4	12	122	105	158	5.74e-12	3.07023	5.14e-13	52.1489	8.39905	11.2411
CNAG_12945	-	unspecified product	5	0	0	24	21	14	0.0114116	3.0701	0.00512729	7.83399	8.39829	1.94265
CNAG_12873	-	unspecified product	4	11	15	109	84	164	4.28e-10	3.04304	5.04e-11	43.1611	8.24228	9.36857
CNAG_04891	-	hypothetical protein	58	58	78	886	543	846	1.68e-37	3.03244	2.7e-39	172.004	8.18194	36.7755
CNAG_07002	-	hypothetical protein, variant	360	282	372	4156	3700	3945	2.82e-102	3.0324	6.93e-105	473.057	8.1817	101.55
CNAG_04921	-	hypothetical protein	11	13	7	104	108	148	2.63e-13	3.01938	2.04e-14	58.4955	8.1082	12.5807
CNAG_01796	-	hypothetical protein, variant 3	238	185	208	2527	2187	2578	1.09e-107	3.01895	2.15e-110	498.374	8.10575	106.962
CNAG_12961	-	unspecified product	15	15	5	133	102	170	4.2e-12	3.00968	3.68e-13	52.8061	8.05389	11.3768
CNAG_04837	MLN1	bHLH family transcription factor	15	12	32	275	191	200	8.85e-15	2.98934	5.9e-16	65.4711	7.94108	14.0531
CNAG_00446	-	hypothetical protein	4	1	2	31	22	26	0.000522456	2.98678	0.000171438	14.1208	7.92703	3.28195
CNAG_03519	-	cytoplasmic protein, variant 2	15	13	17	161	179	166	1.22e-18	2.98572	5.45e-20	83.8103	7.92119	17.9124
CNAG_01244	-	hypothetical protein, variant	4	10	7	86	62	89	4.06e-09	2.97792	5.51e-10	38.4874	7.87852	8.3911
CNAG_02018	-	hypothetical protein	265	224	297	3224	2790	2776	5.42e-81	2.97703	2.33e-83	374.154	7.87365	80.2661
CNAG_06507	-	hypothetical protein	36	19	21	319	242	281	1.18e-22	2.95984	4.11e-24	102.598	7.78037	21.9281
CNAG_13077	-	unspecified product	4	1	1	29	19	18	0.00230295	2.9566	0.000874684	11.0757	7.76294	2.63772
CNAG_07620	-	hypothetical protein	2	0	1	6	14	13	0.0337101	2.95509	0.0173794	5.65765	7.75483	1.47224
CNAG_12251	-	unspecified product	1	0	4	23	14	18	0.00801032	2.94716	0.00346395	8.54541	7.71228	2.09635
CNAG_07844	-	hypothetical protein	41	32	51	467	382	509	2.3e-36	2.93751	3.88e-38	166.706	7.66087	35.6378
CNAG_12451	-	unspecified product	1	3	0	12	12	20	0.0155475	2.93305	0.00722797	7.21543	7.63724	1.80834
CNAG_04947	-	high-affinity nicotinic acid transporter, variant 2	1	2	6	43	16	40	0.00077455	2.93056	0.000262945	13.3175	7.62408	3.11095
CNAG_12310	-	unspecified product	57	16	47	428	377	499	1.09e-17	2.92795	5.19e-19	79.3545	7.61026	16.9633
CNAG_12303	-	unspecified product	7	0	3	36	27	46	0.000424366	2.92632	0.000136081	14.5556	7.6017	3.37226
CNAG_12252	-	unspecified product	11	0	2	57	32	52	0.000687775	2.92459	0.000230865	13.5616	7.59259	3.16255
CNAG_12375	-	unspecified product	4	4	1	35	21	42	0.000242471	2.91864	7.42349e-05	15.6997	7.56133	3.61534
CNAG_12047	-	unspecified product	5	9	5	71	61	72	2.06e-08	2.9115	3.14e-09	35.0958	7.52399	7.68571
CNAG_12759	-	unspecified product	4	0	0	24	5	14	0.0466598	2.90812	0.0250826	5.01818	7.50637	1.33106
CNAG_13019	-	unspecified product	19	7	23	203	149	171	1.78e-13	2.90663	1.35e-14	59.3072	7.49865	12.7508
CNAG_02544	-	DNA repair protein Swi5/Sae3	30	30	41	418	288	371	5.07e-28	2.90075	1.27e-29	127.761	7.46815	27.2948
CNAG_13117	-	unspecified product	5	15	4	89	60	108	1.99e-07	2.89409	3.53e-08	30.394	7.43375	6.70081
CNAG_00844	-	hypothetical protein	9	2	5	82	32	56	2.18305e-05	2.8933	5.44621e-06	20.6736	7.42967	4.66094
CNAG_06973	-	hypothetical protein	49	52	74	571	600	680	1.86e-43	2.89096	2.36e-45	199.756	7.41762	42.7294
CNAG_12177	-	unspecified product	2	0	1	15	4	13	0.0469335	2.88718	0.025247	5.00686	7.39822	1.32852
CNAG_07658	-	hypothetical protein	0	3	1	17	12	13	0.0183881	2.8804	0.00871135	6.88107	7.36352	1.73546
CNAG_02169	-	hypothetical protein	19	24	22	201	216	264	6.6e-23	2.87444	2.24e-24	103.799	7.33317	22.1806
CNAG_12210	-	unspecified product	39	43	23	313	387	393	1.5e-25	2.87109	4.26e-27	116.219	7.31618	24.8225
CNAG_12816	-	unspecified product	33	15	43	310	264	372	1.16e-18	2.86087	5.17e-20	83.915	7.26455	17.9342
CNAG_02484	-	peptidyl-prolyl cis-trans isomerase, variant	44	28	72	432	473	586	5.36e-22	2.85766	1.96e-23	99.5062	7.24839	21.2712
CNAG_01992	-	hypothetical protein	55	34	78	669	463	592	1.94e-24	2.85494	5.97e-26	110.981	7.23475	23.7131
CNAG_05659	-	hypothetical protein	5	1	1	26	20	26	0.00196986	2.85051	0.000738485	11.3898	7.21254	2.70557
CNAG_07404	-	hypothetical protein	16	18	22	222	137	219	1.11e-16	2.84766	6.04e-18	74.5087	7.19834	15.9553
CNAG_12984	-	unspecified product	7	2	8	79	47	47	6.40273e-06	2.84262	1.45563e-06	23.2057	7.1732	5.19363
CNAG_13158	-	unspecified product	8	4	3	61	57	32	2.39545e-05	2.83153	6.02911e-06	20.4789	7.11828	4.62061
CNAG_12762	-	unspecified product	5	8	6	80	51	61	2.09e-07	2.82523	3.72e-08	30.2905	7.08727	6.67944
CNAG_07913	-	hypothetical protein	8	1	4	40	27	66	0.000177254	2.82292	5.2699e-05	16.3485	7.07592	3.7514
CNAG_03990	-	hypothetical protein	87	43	62	693	576	657	5.57e-32	2.81701	1.11e-33	146.312	7.04703	31.2542
CNAG_02592	-	thioredoxin reductase GliT	88	78	107	958	994	765	5.81e-38	2.81622	9.15e-40	174.157	7.04314	37.2357
CNAG_03404	-	hypothetical protein, variant	383	452	485	4441	4414	4330	1.35e-93	2.81326	3.99e-96	432.804	7.02871	92.8694
CNAG_07765	-	hypothetical protein	0	15	4	76	65	48	0.0004575	2.81113	0.000147831	14.3996	7.01833	3.33961
CNAG_06913	-	L-serine ammonia-lyase	129	97	176	1637	1019	1348	2.1e-31	2.80258	4.34e-33	143.601	6.97687	30.6772
CNAG_01121	-	hypothetical protein	146	43	100	977	770	1125	2.08e-17	2.79682	1.02e-18	78.0158	6.94909	16.6823
CNAG_00932	-	hypothetical protein	227	243	142	2539	1471	1894	1.58e-29	2.75707	3.65e-31	134.8	6.7602	28.8015
CNAG_13055	-	unspecified product	2	3	7	44	21	52	0.000283874	2.75404	8.78882e-05	15.3806	6.74605	3.54687
CNAG_12370	-	unspecified product	5	0	0	11	16	21	0.0355035	2.75021	0.0184262	5.55517	6.72817	1.44973
CNAG_07527	-	alpha-1,6-mannosyltransferase	7	6	21	127	69	132	2.16e-07	2.74549	3.85e-08	30.225	6.70619	6.66567
CNAG_12659	-	unspecified product	1	2	2	18	11	19	0.00963855	2.74072	0.00424983	8.17386	6.68403	2.01599
CNAG_07588	-	hypothetical protein	6	1	3	39	23	33	0.000626133	2.73434	0.000208634	13.7517	6.65456	3.20333
CNAG_01668	-	hypothetical protein	16	1	20	137	97	116	3.56099e-06	2.73275	7.76e-07	24.4158	6.64722	5.44843
CNAG_06189	-	hypothetical protein	21	11	13	168	112	146	1.62e-12	2.73008	1.36e-13	54.7681	6.63493	11.7906
CNAG_06055	-	hypothetical protein	148	153	173	1503	1387	1591	9.18e-88	2.72915	3.61e-90	405.435	6.63066	87.0372
CNAG_07949	0	hypothetical protein	2	9	12	71	66	81	8.2e-07	2.72913	1.59e-07	27.4745	6.63054	6.08623
CNAG_06346	BLP1	Barwin-like protein 1	143	83	144	1259	887	1362	9.15e-33	2.72629	1.77e-34	149.963	6.61752	32.0386
CNAG_07495	-	hypothetical protein	3	12	1	59	47	44	0.000250363	2.7209	7.67126e-05	15.6376	6.59283	3.60143
CNAG_02781	-	dihydrodipicolinate synthetase, variant	121	105	97	1003	950	1081	3.22e-68	2.72045	1.78e-70	314.999	6.59076	67.4928
CNAG_12829	-	unspecified product	1	1	2	11	9	18	0.0233887	2.71922	0.011483	6.389	6.58515	1.63099
CNAG_00907	-	hypothetical protein, variant	215	118	175	1500	1634	1610	2.27e-40	2.71778	3.16e-42	185.431	6.57861	39.6431
CNAG_12603	-	unspecified product	6	11	16	119	79	107	3.51e-09	2.69239	4.71e-10	38.7935	6.46381	8.45447
CNAG_04472	-	membrane protein	44	34	54	423	361	431	4.36e-31	2.69016	9.22e-33	142.105	6.45387	30.3604
CNAG_02040	-	hypothetical protein	54	34	63	503	376	514	9.56e-27	2.69008	2.55e-28	121.803	6.45351	26.0197
CNAG_07954	-	hypothetical protein	68	28	25	345	370	393	3.85e-15	2.6878	2.45e-16	67.2058	6.44329	14.4148
CNAG_12272	-	unspecified product	4	6	5	61	29	48	3.4962e-05	2.68268	9.09194e-06	19.6933	6.42049	4.4564
CNAG_12341	-	unspecified product	3	2	1	19	15	21	0.00609292	2.68022	0.00254358	9.10898	6.40952	2.21517
CNAG_02966	-	carboxypeptidase	107	93	118	925	1001	967	4.96e-55	2.67921	3.84e-57	253.806	6.40504	54.3044
CNAG_07693	-	high-affinity methionine permease, variant	7	4	9	58	69	54	1.26405e-06	2.67793	2.53e-07	26.5798	6.39935	5.89824
CNAG_06787	-	metacaspase	39	58	83	549	426	678	1.99e-22	2.67626	7.06e-24	101.524	6.39198	21.7002
CNAG_07391	-	hypothetical protein	51	43	49	433	414	454	4.3e-38	2.67545	6.61e-40	174.802	6.3884	37.3663
CNAG_06267	-	hypothetical protein	113	120	123	1150	1051	1030	1.15e-60	2.67539	7.76e-63	279.934	6.38812	59.9401
CNAG_12259	-	unspecified product	5	2	6	34	42	42	7.4052e-05	2.67486	2.04191e-05	18.1498	6.38577	4.13046
CNAG_03233	-	yippee-like, putative	118	124	156	1307	922	1374	1e-44	2.65929	1.22e-46	205.654	6.31724	43.9993
CNAG_13011	-	unspecified product	20	16	13	148	126	168	1.71e-14	2.65763	1.16e-15	64.1315	6.30997	13.7681
CNAG_00915	-	hypothetical protein	106	92	138	1127	936	902	5.26e-38	2.63616	8.22e-40	174.369	6.21676	37.2786
CNAG_13182	-	unspecified product	8	2	0	25	33	30	0.00462873	2.63595	0.00187585	9.66722	6.21584	2.33454
CNAG_05032	-	hypothetical protein	216	135	226	1881	1398	1836	8.43e-39	2.63415	1.25e-40	178.108	6.20808	38.074
CNAG_02381	-	hypothetical protein	4	0	2	18	10	25	0.0185629	2.6135	0.00881241	6.86046	6.11987	1.73135
CNAG_12914	-	unspecified product	67	49	95	538	558	749	4.22e-26	2.61109	1.17e-27	118.785	6.10966	25.3748
CNAG_12646	-	unspecified product	4	5	12	49	62	72	5.55891e-06	2.60969	1.25217e-06	23.4953	6.10374	5.25501
CNAG_05304	-	hypothetical protein	57	48	64	464	383	634	5.42e-28	2.6083	1.36e-29	127.621	6.09785	27.2662
CNAG_12583	-	unspecified product	0	1	6	17	26	17	0.0186784	2.60371	0.00886954	6.84891	6.07848	1.72866
CNAG_04023	EZT1	hypothetical protein	3583	4306	3464	35225	29138	33987	3.64e-93	2.60254	1.12e-95	430.747	6.07356	92.4395
CNAG_02184	-	hypothetical protein	1	2	3	22	13	17	0.00989506	2.60151	0.00438118	8.11867	6.06921	2.00458
CNAG_07755	-	hypothetical protein, variant 2	11	30	28	230	158	210	2.64e-12	2.59893	2.26e-13	53.7682	6.05837	11.579
CNAG_12516	-	unspecified product	50	37	40	427	330	332	2.26e-24	2.59383	7.05e-26	110.652	6.03701	23.6463
CNAG_07585	-	hypothetical protein	3	10	3	45	48	44	8.65679e-05	2.59081	2.41513e-05	17.8302	6.02438	4.06264
CNAG_01945	-	hypothetical protein	9	7	6	62	53	74	4.36e-07	2.58587	8.17e-08	28.7647	6.00376	6.36065
CNAG_12176	-	unspecified product	5	3	12	58	42	72	2.45269e-05	2.58154	6.18827e-06	20.4291	5.98578	4.61036
CNAG_12582	-	unspecified product	0	2	3	14	11	18	0.0263245	2.58041	0.0131218	6.15262	5.98108	1.57964
CNAG_06695	46082	Macrophage activating regulator of cell wall-1	75	67	111	682	609	876	4.68e-31	2.57936	9.95e-33	141.955	5.97674	30.3302
CNAG_05326	-	hypothetical protein	139	129	122	1166	1004	1145	3.47e-66	2.5765	2.01e-68	305.579	5.96492	65.4595
CNAG_07725	-	HMG box factor	1	1	3	14	9	20	0.0232992	2.57425	0.011419	6.39892	5.95562	1.63266
CNAG_12728	-	unspecified product	21	8	16	113	123	146	1.17e-10	2.57361	1.28e-11	45.8411	5.95299	9.93304
CNAG_12199	-	unspecified product	4	8	5	56	35	54	2.31114e-05	2.57296	5.80271e-06	20.5522	5.9503	4.63617
CNAG_12498	-	unspecified product	16	8	14	93	98	132	6.02e-10	2.57095	7.24e-11	42.4543	5.94202	9.22064
CNAG_05654	-	hypothetical protein	973	898	506	7537	5730	6829	2.96e-31	2.56814	6.2e-33	142.895	5.93044	30.5281
CNAG_12002	-	unspecified product	10	12	2	81	55	67	9.99684e-06	2.56805	2.36001e-06	22.2771	5.93006	5.00014
CNAG_03091	-	hypothetical protein	8	1	0	28	17	31	0.0149412	2.5589	0.00692404	7.29257	5.8926	1.82562
CNAG_03145	-	hypothetical protein	35	23	13	199	163	235	6.98e-13	2.55439	5.6e-14	56.5057	5.87418	12.1562
CNAG_12234	-	unspecified product	1	1	3	14	12	16	0.0217861	2.55438	0.0105649	6.53707	5.87414	1.66182
CNAG_04459	-	hypothetical protein	8	5	11	110	33	57	7.55259e-05	2.54399	2.0885e-05	18.1068	5.83201	4.1219
CNAG_05472	SPO11	meiotic recombination protein SPO11, variant 2	13	14	24	129	146	147	4.73e-12	2.54031	4.2e-13	52.5496	5.81713	11.3249
CNAG_03346	BZP4	bZip transcription factor, putative	144	224	224	1912	1516	1450	8.32e-33	2.5363	1.6e-34	150.165	5.80101	32.0799
CNAG_08015	-	hypothetical protein	38	32	41	292	233	399	3.63e-20	2.53345	1.48e-21	90.9355	5.78954	19.4407
CNAG_04614	-	hypothetical protein	220	108	144	1210	1299	1367	2.22e-28	2.53053	5.37e-30	129.463	5.77783	27.6543
CNAG_12943	-	unspecified product	7	3	4	32	43	39	0.000180937	2.52149	5.39942e-05	16.3024	5.74175	3.74247
CNAG_06876	-	Alpha-ketoglutarate-dependent taurine dioxygenase	877	738	860	6731	6482	6681	3.02e-103	2.49921	6.68e-106	477.725	5.65375	102.52
CNAG_03772	HXS1	high-affinity glucose transporter	821	514	883	6347	5911	5382	2.1e-35	2.48899	3.6e-37	162.279	5.61384	34.677
CNAG_13007	-	unspecified product	9	22	47	201	160	267	1.14e-07	2.48389	1.94e-08	31.5533	5.59406	6.94237
CNAG_04092	-	Sugar transporter	52	59	51	477	442	362	1.57e-24	2.48174	4.82e-26	111.407	5.5857	23.8029
CNAG_02321	-	hypothetical protein	10	0	12	85	44	45	0.00137071	2.48071	0.000494319	12.137	5.58172	2.86305
CNAG_12968	-	unspecified product	12	20	33	184	150	184	2.11e-11	2.4804	2.06e-12	49.4279	5.58053	10.6756
CNAG_13022	-	unspecified product	14	9	18	101	101	124	5.93e-10	2.47757	7.12e-11	42.4869	5.56959	9.22699
CNAG_03307	-	hypothetical protein	1	8	3	34	23	39	0.00220889	2.47477	0.000835157	11.1614	5.55879	2.65583
CNAG_00549	-	hypothetical protein, variant	45	23	70	309	230	574	1.42e-09	2.47473	1.79e-10	40.6856	5.55862	8.84895
CNAG_01512	-	hypothetical protein, variant	692	475	760	5763	4378	5034	4.3e-41	2.46751	5.71e-43	188.836	5.5309	40.3668
CNAG_06337	-	hypothetical protein	21	22	16	189	114	161	7.43e-12	2.45962	6.78e-13	51.6061	5.5007	11.1287
CNAG_12243	-	unspecified product	8	2	6	53	19	55	0.000976106	2.45863	0.000338571	12.844	5.49694	3.0105
CNAG_05487	-	hypothetical protein	18	22	43	186	201	261	3.48e-12	2.44774	3.02e-13	53.1944	5.45561	11.4584
CNAG_12522	-	unspecified product	9	5	8	66	48	57	5.36041e-06	2.44768	1.20389e-06	23.571	5.45537	5.2708
CNAG_07496	-	hypothetical protein	17	35	20	225	175	157	2.62e-11	2.44651	2.63e-12	48.9472	5.45096	10.5816
CNAG_02572	-	hypothetical protein	35	18	28	219	171	240	5.95e-15	2.4433	3.86e-16	66.3085	5.43886	14.2254
CNAG_07934	-	hypothetical protein	0	3	4	20	10	25	0.0233475	2.44012	0.0114541	6.39346	5.42687	1.63176
CNAG_12043	-	unspecified product	3	1	2	21	12	13	0.0216011	2.43209	0.0104609	6.55467	5.39675	1.66552
CNAG_07505	-	hypothetical protein	12	5	23	89	114	101	1.44082e-06	2.42284	2.92e-07	26.3022	5.36227	5.84139
CNAG_12069	-	unspecified product	24	11	25	175	106	179	9.19e-10	2.41848	1.13e-10	41.5898	5.34608	9.03655
CNAG_12757	-	unspecified product	8	8	11	43	89	72	9.16805e-06	2.41569	2.13391e-06	22.4705	5.33575	5.03772
CNAG_01954	-	aldo-keto reductase	24	27	29	249	202	150	2.26e-12	2.4105	1.92e-13	54.0845	5.31659	11.6458
CNAG_04548	-	hypothetical protein	37	38	12	232	215	209	1.42e-10	2.40839	1.58e-11	45.4383	5.30882	9.84857
CNAG_10503	-	unspecified product	4	4	4	23	28	40	0.0010169	2.40274	0.000354846	12.7561	5.28807	2.99272
CNAG_06727	-	hypothetical protein, variant 2	138	168	165	1070	1166	1291	2.58e-53	2.39307	2.25e-55	245.696	5.25273	52.5882
CNAG_04850	-	hypothetical protein, variant	141	115	145	988	909	1105	1.61e-53	2.39111	1.34e-55	246.724	5.24562	52.7937
CNAG_04911	-	hypothetical protein, variant	84	80	51	537	500	569	1.81e-28	2.38984	4.33e-30	129.89	5.24099	27.7431
CNAG_04274	-	acyl-CoA thioesterase II	10	30	24	138	170	169	1.28e-09	2.38797	1.62e-10	40.8816	5.23419	8.89124
CNAG_01827	-	hypothetical protein	147	121	157	1088	1061	984	4.47e-43	2.37754	5.72e-45	197.994	5.19648	42.3493
CNAG_04551	-	hypothetical protein	33	31	6	185	179	150	6.44e-07	2.37509	1.23e-07	27.971	5.18769	6.19133
CNAG_03825	-	hypothetical protein	6	10	2	44	27	63	0.00073026	2.36313	0.000246024	13.4422	5.14484	3.13652
CNAG_12801	-	unspecified product	12	2	9	69	50	47	0.000177551	2.34914	5.28309e-05	16.3437	5.09522	3.75068
CNAG_07858	-	hypothetical protein	1	4	2	16	15	20	0.0179673	2.3467	0.00849211	6.92664	5.08659	1.74552
CNAG_07303	-	hypothetical protein, variant	49	53	54	440	383	298	7.98e-19	2.34533	3.53e-20	84.6652	5.08176	18.0978
CNAG_05412	-	hypothetical protein	34	29	33	265	198	232	1.85e-17	2.34486	9.03e-19	78.2616	5.0801	16.732
CNAG_06872	-	5-oxoprolinase	38	18	24	179	198	197	1.16e-12	2.33679	9.55e-14	55.4568	5.05177	11.9344
CNAG_07969	-	hypothetical protein	51	15	31	283	164	249	6.94e-09	2.32792	9.82e-10	37.361	5.02082	8.15886
CNAG_12503	-	unspecified product	10	5	10	63	44	72	1.41978e-05	2.31985	3.42681e-06	21.5614	4.99282	4.84778
CNAG_07788	-	hypothetical protein	23	13	37	157	153	210	7.64e-10	2.31534	9.33e-11	41.9569	4.97721	9.11677
CNAG_07762	-	hypothetical protein	12	8	14	78	88	73	3.88e-07	2.3116	7.18e-08	29.0149	4.96435	6.41103
CNAG_12354	-	unspecified product	9	5	5	55	26	54	0.000331732	2.30507	0.000104255	15.058	4.94192	3.47921
CNAG_12716	-	unspecified product	10	1	5	28	27	59	0.00372311	2.30201	0.00148229	10.1005	4.93143	2.42909
CNAG_12722	-	unspecified product	48	59	46	417	306	351	2.1e-21	2.30038	7.85e-23	96.7551	4.92588	20.678
CNAG_12627	-	unspecified product	162	74	183	934	976	1022	4.3e-17	2.29968	2.21e-18	76.4949	4.92348	16.367
CNAG_07893	-	hypothetical protein	390	291	427	2702	2434	2609	5.13e-48	2.29683	5.55e-50	220.972	4.91376	47.2899
CNAG_12318	-	unspecified product	4	4	1	22	16	25	0.0105107	2.28764	0.00468608	7.99677	4.88257	1.97837
CNAG_06292	-	sugar transporter, variant 2	67	67	80	516	428	546	1.4e-31	2.2851	2.86e-33	144.431	4.87398	30.8535
CNAG_07124	-	hypothetical protein	6	3	8	38	37	43	0.000339628	2.28372	0.000106945	15.01	4.8693	3.469
CNAG_02661	ISP4	Identified spore protein 4	621	472	544	3958	3638	3645	5.42e-60	2.27343	3.73e-62	276.805	4.83472	59.2661
CNAG_03041	-	hypothetical protein	34	25	53	258	193	327	2.47e-12	2.27324	2.11e-13	53.8989	4.83408	11.6073
CNAG_03597	-	hypothetical protein, variant	87	54	65	441	408	576	4.82e-23	2.27265	1.62e-24	104.436	4.8321	22.317
CNAG_12561	-	unspecified product	10	8	37	134	98	148	2.30481e-05	2.26897	5.78115e-06	20.5593	4.8198	4.63737
CNAG_01851	-	hypothetical protein	1	2	3	21	10	10	0.0437958	2.26624	0.0233761	5.14034	4.81069	1.35857
CNAG_03504	-	hypothetical protein	262	294	333	2027	2056	1977	7.68e-54	2.2627	6.33e-56	248.226	4.79887	53.1146
CNAG_03635	-	hypothetical protein	14	10	23	107	92	120	4.44e-08	2.24785	7.1e-09	33.5063	4.74973	7.35256
CNAG_12039	-	unspecified product	9	10	23	106	70	109	2.12747e-06	2.24283	4.47e-07	25.4786	4.73324	5.67214
CNAG_07455	-	hypothetical protein	0	3	5	17	13	24	0.034367	2.22675	0.0177561	5.62006	4.68077	1.46386
CNAG_13004	-	unspecified product	14	14	10	104	69	80	4.98e-07	2.22464	9.38e-08	28.4985	4.67395	6.30294
CNAG_04006	-	hypothetical protein	11	12	8	83	44	81	1.14468e-05	2.22364	2.72763e-06	21.9992	4.67071	4.94132
CNAG_07832	-	hypothetical protein	5	4	5	23	35	35	0.00164474	2.22325	0.00060548	11.7591	4.66944	2.7839
CNAG_05987	-	hypothetical protein	5	2	19	58	45	71	0.00165408	2.22171	0.00060912	11.7479	4.66445	2.78144
CNAG_12566	-	unspecified product	4	1	8	28	15	45	0.0109778	2.22156	0.00491323	7.9111	4.66399	1.95948
CNAG_06539	-	monocarboxylic acid transporter, variant	36	28	54	272	231	281	6.14e-15	2.21928	4e-16	66.2386	4.65662	14.2117
CNAG_04337	-	cation diffusion facilitator	28	11	27	162	137	136	8.66e-09	2.21523	1.23e-09	36.914	4.64357	8.0627
CNAG_00651	-	ATP-binding cassette, subfamily D (ALD), peroxisomal long-chain fatty acid import protein	185	277	239	1601	1402	1637	1.35e-39	2.21357	1.96e-41	181.805	4.6382	38.8703
CNAG_05338	-	hypothetical protein	104	104	59	447	605	712	5.73e-17	2.20982	2.95e-18	75.9216	4.62617	16.2419
CNAG_12286	-	unspecified product	5	5	10	51	36	44	0.000299299	2.19914	9.32526e-05	15.2686	4.59206	3.52389
CNAG_02694	-	hypothetical protein, variant	64	26	39	280	279	279	2.71e-12	2.19426	2.33e-13	53.7054	4.57656	11.5664
CNAG_12731	-	unspecified product	10	4	4	30	40	47	0.000995562	2.18837	0.000345931	12.8037	4.55791	3.00193
CNAG_12433	-	unspecified product	2	6	3	29	23	19	0.00899253	2.18654	0.00393292	8.31453	4.55213	2.04612
CNAG_02160	-	hypothetical protein, variant	137	81	106	661	617	828	3.02e-25	2.18466	8.72e-27	114.798	4.54619	24.5205
CNAG_12618	-	unspecified product	13	11	35	109	118	156	2.03876e-06	2.18132	4.26e-07	25.571	4.53567	5.69063
CNAG_05929	-	MFS transporter, SP family, general alpha glucoside:H symporter	244	183	258	1508	1487	1407	4.73e-38	2.17923	7.33e-40	174.596	4.52911	37.3248
CNAG_07538	-	calcium/proton exchanger	1844	2869	1793	13884	12293	15856	5.35e-32	2.17452	1.06e-33	146.406	4.51435	31.272
CNAG_12050	-	unspecified product	1	5	5	18	24	29	0.0109409	2.17348	0.00489267	7.91869	4.51111	1.96095
CNAG_00047	PKP1	pyruvate dehydrogenase kinase	370	381	353	2152	2267	2689	2.37e-69	2.17324	1.28e-71	320.242	4.51034	68.6249
CNAG_06966	AKP1	alkaline phosphatase D	43	40	73	352	277	377	2.59e-15	2.17263	1.62e-16	68.0158	4.50846	14.5873
CNAG_03194	-	saccharopine dehydrogenase, variant	1107	876	775	5720	5965	5957	4.78e-48	2.17091	5.11e-50	221.135	4.50307	47.3206
CNAG_03938	CPR2	Nonmating-type specific pheromone G-protein coupled receptor	63	42	59	425	275	353	1.92e-16	2.17025	1.07e-17	73.3759	4.50102	15.7177
CNAG_07358	-	hypothetical protein	135	95	141	786	747	845	6.52e-33	2.16969	1.23e-34	150.674	4.49927	32.1856
CNAG_01858	HOB2	hypothetical protein	145	120	137	902	750	929	4.67e-42	2.16945	6.08e-44	193.291	4.49851	41.3311
CNAG_04038	-	MFS quinate transporter QutD	361	260	422	2300	2111	2263	5.85e-35	2.16933	1.02e-36	160.204	4.49814	34.233
CNAG_12335	-	unspecified product	0	5	3	12	14	26	0.0469073	2.16731	0.0252272	5.00822	4.49185	1.32876
CNAG_01994	-	hypothetical protein	22	16	21	139	128	107	3.59e-09	2.16254	4.82e-10	38.7496	4.47702	8.4455
CNAG_07425	-	hypothetical protein	2	9	16	51	52	70	0.000654528	2.16041	0.000218739	13.6628	4.47042	3.18407
CNAG_05582	-	hypothetical protein	18	14	26	142	92	137	2.32e-08	2.15988	3.57e-09	34.8448	4.46878	7.63496
CNAG_13190	-	unspecified product	0	5	6	23	23	24	0.0196981	2.15815	0.00942639	6.7402	4.46342	1.70558
CNAG_12878	-	unspecified product	8	6	18	48	63	94	0.000121775	2.15717	3.50368e-05	17.1229	4.46038	3.91444
CNAG_05114	-	peroxisomal copper amine oxidase	214	166	157	1206	1146	1040	7.14e-33	2.15581	1.36e-34	150.48	4.45619	32.146
CNAG_12725	-	unspecified product	3	2	2	15	17	12	0.0338019	2.15453	0.017435	5.65204	4.45225	1.47106
CNAG_03911	-	hydrolase	132	124	136	751	740	1005	3.2e-37	2.15312	5.23e-39	170.69	4.4479	36.4951
CNAG_13176	-	unspecified product	4	1	2	18	14	12	0.0405067	2.15129	0.0214562	5.28936	4.44224	1.39247
CNAG_00374	-	hypothetical protein	672	628	615	4187	3460	4461	7.97e-80	2.14567	3.53e-82	368.736	4.42498	79.0986
CNAG_13133	-	unspecified product	7	24	26	116	97	149	2.59857e-06	2.14396	5.55e-07	25.0637	4.41975	5.58527
CNAG_00262	-	hypothetical protein, variant	9	2	4	36	28	30	0.00414461	2.14139	0.00166487	9.88659	4.41187	2.38252
CNAG_12056	-	unspecified product	3	4	1	22	15	13	0.031368	2.14035	0.0159717	5.80599	4.40868	1.50351
CNAG_04492	-	hypothetical protein	640	589	712	4045	3678	4485	4.08e-77	2.13947	1.96e-79	356.133	4.40601	76.3892
CNAG_04874	-	hypothetical protein	171	168	248	1317	958	1408	8.95e-27	2.1307	2.38e-28	121.942	4.37929	26.0482
CNAG_04059	-	hypothetical protein	16	29	32	165	130	188	6.77e-10	2.12979	8.23e-11	42.2026	4.37652	9.16959
CNAG_05739	-	hypothetical protein	65	62	39	368	305	362	7.29e-18	2.12833	3.41e-19	80.1824	4.37211	17.1374
CNAG_12741	-	unspecified product	7	2	23	89	42	69	0.00330415	2.12619	0.00130167	10.3402	4.36562	2.48094
CNAG_12756	-	unspecified product	25	21	33	189	151	148	1.34e-10	2.12083	1.48e-11	45.5571	4.34945	9.87146
CNAG_01562	BLP4	pr4/barwin domain protein	10140	7633	8445	63093	46892	51313	1.16e-43	2.11305	1.45e-45	200.728	4.32605	42.9374
CNAG_01735	-	hypothetical protein	4570	3402	2085	24094	19469	17881	2.17e-08	2.10866	3.32e-09	34.9881	4.31291	7.66414
CNAG_13099	-	unspecified product	44	45	54	330	195	359	2.56e-13	2.10389	1.98e-14	58.5556	4.29867	12.5925
CNAG_06524	FRE3	hypothetical protein, variant	69	74	75	508	309	527	5.98e-18	2.10204	2.79e-19	80.582	4.29315	17.223
CNAG_12384	-	unspecified product	10	10	3	43	44	54	0.000462505	2.10186	0.000149619	14.377	4.29262	3.33488
CNAG_13107	-	unspecified product	2	6	1	22	15	18	0.031574	2.09758	0.0161306	5.78858	4.27992	1.50067
CNAG_07369	-	hypothetical protein	27	7	35	150	110	162	9.20219e-06	2.09596	2.14412e-06	22.4614	4.2751	5.03611
CNAG_01048	-	hypothetical protein, variant	34	36	24	206	149	219	6.84e-12	2.09212	6.21e-13	51.7793	4.26375	11.1647
CNAG_12534	-	unspecified product	10	9	10	56	50	71	2.13592e-05	2.09171	5.31025e-06	20.722	4.26253	4.67042
CNAG_07578	-	hypothetical protein	32	31	63	315	218	230	7.06e-10	2.0904	8.6e-11	42.1175	4.25867	9.15113
CNAG_01883	GAT8	hypothetical protein	14	17	37	144	134	131	3.28e-07	2.08147	6.01e-08	29.3611	4.23239	6.48427
CNAG_12820	-	unspecified product	9	22	13	65	76	125	2.18749e-05	2.06857	5.45998e-06	20.6688	4.1947	4.66005
CNAG_00036	SEC14-2	SEC14 cytosolic factor	118	153	125	740	808	807	7.14e-32	2.06387	1.44e-33	145.794	4.18106	31.1462
CNAG_04413	-	hypothetical protein	6	8	7	44	39	42	0.000379438	2.06339	0.000120423	14.7861	4.17967	3.42086
CNAG_03697	-	hormone-sensitive lipase	396	601	430	2766	2819	2896	4.21e-33	2.06174	7.87e-35	151.57	4.17489	32.3757
CNAG_01542	-	taurine catabolism dioxygenase TauD	180	159	141	901	956	970	1.3e-37	2.0504	2.07e-39	172.532	4.14219	36.8875
CNAG_01570	-	hypothetical protein, variant	9	27	9	92	58	119	0.000141736	2.04856	4.14071e-05	16.8058	4.13694	3.84852
CNAG_06822	-	hypothetical protein	118	104	148	727	707	741	7.97e-30	2.04675	1.78e-31	136.223	4.13173	29.0987
CNAG_07834	-	hypothetical protein	15	35	32	166	173	141	3.8e-08	2.04637	6.03e-09	33.8245	4.13066	7.42059
CNAG_13106	-	unspecified product	2	4	5	14	14	38	0.0254971	2.04252	0.0126592	6.21612	4.11964	1.59351
CNAG_05064	-	hypothetical protein	28	7	20	100	100	123	8.70101e-06	2.04225	2.01665e-06	22.5791	4.11887	5.06043
CNAG_00393	GLC3	1,4-alpha-glucan-branching enzyme	4588	3742	3276	24077	23212	20252	2.57e-37	2.03921	4.18e-39	171.137	4.1102	36.5895
CNAG_07853	-	hypothetical protein	2	7	8	34	27	39	0.00392643	2.03666	0.00157047	9.99404	4.10295	2.406
CNAG_12537	-	unspecified product	13	13	33	104	81	164	1.83879e-05	2.03427	4.53311e-06	21.0251	4.09615	4.73547
CNAG_06944	-	hypothetical protein	677	530	709	3791	3516	3841	3.93e-51	2.03131	3.67e-53	235.551	4.08775	50.4057
CNAG_04160	-	hypothetical protein, variant	88	49	131	530	487	538	8.75e-12	2.02737	8.08e-13	51.263	4.07662	11.0581
CNAG_12718	-	unspecified product	13	9	15	79	70	65	9.84565e-06	2.02727	2.31695e-06	22.3125	4.07633	5.00676
CNAG_06498	-	hypothetical protein	572	287	426	2495	2245	2726	1.56e-21	2.02718	5.81e-23	97.3482	4.07609	20.8067
CNAG_07869	-	hypothetical protein	6	8	8	51	38	38	0.000575358	2.02185	0.0001903	13.9245	4.06104	3.24006
CNAG_07432	-	hypothetical protein	117	110	155	813	703	680	4.12e-24	2.0174	1.32e-25	109.414	4.04854	23.3851
CNAG_01689	-	hypothetical protein, variant	11	14	17	58	91	93	9.67912e-06	2.01647	2.26834e-06	22.3532	4.04592	5.01416
CNAG_06827	-	hypothetical protein, variant	11	6	12	48	55	63	0.000119308	2.00548	3.42389e-05	17.1667	4.01523	3.92333
CNAG_02590	-	3-hydroxyisobutyrate dehydrogenase	403	314	415	2159	2048	2262	1.4e-47	2.00484	1.58e-49	218.884	4.01343	46.8537
CNAG_02665	-	hypothetical protein, variant	234	215	265	1487	1286	1293	6.1e-38	2.00272	9.68e-40	174.045	4.00754	37.2146
CNAG_05377	ITR3	myo-inositol transporter, putative	50	35	27	243	183	213	4.71e-11	2.00208	4.92e-12	47.72	4.00578	10.327
CNAG_03838	-	hypothetical protein	11	6	28	115	67	74	0.00048507	2.00035	0.000157668	14.2783	4.00097	3.3142
CNAG_06904	-	hypothetical protein	147	114	165	822	697	910	1.17e-28	1.99645	2.77e-30	130.774	3.99017	27.9322
CNAG_12834	-	unspecified product	135	42	93	540	435	558	2.06e-09	1.9936	2.68e-10	39.8983	3.98229	8.6852
CNAG_02531	CPK2	Calcium-dependent protein kinase 2	296	246	312	1551	1499	1783	5.16e-48	1.98797	5.65e-50	220.937	3.96677	47.2871
CNAG_05514	-	hypothetical protein	44	25	38	189	197	218	9.12e-12	1.98702	8.45e-13	51.1736	3.96418	11.04
CNAG_02264	-	AFG1-family ATPase, variant	164	360	247	1335	1369	1663	7.64e-16	1.98528	4.61e-17	70.4953	3.9594	15.1168
CNAG_07931	-	hypothetical protein	13	10	21	54	88	107	4.70547e-05	1.98494	1.24507e-05	19.0929	3.95846	4.3274
CNAG_06256	-	hypothetical protein	17	34	30	159	172	121	1.54e-07	1.98181	2.66e-08	30.9374	3.94989	6.81196
CNAG_07471	-	hypothetical protein	35	9	60	219	174	191	6.52258e-05	1.9818	1.78363e-05	18.4074	3.94985	4.18558
CNAG_07458	-	hypothetical protein, variant	187	109	166	962	715	925	2.04e-20	1.98052	8.02e-22	92.1547	3.94634	19.6909
CNAG_01232	PMC1	calcium-translocating P-type ATPase, PMCA-type	3309	3054	3061	18509	16381	18058	6.47e-95	1.98037	1.75e-97	439.041	3.94594	94.1891
CNAG_08020	-	hypothetical protein	227	268	270	1144	1376	1797	2.97e-28	1.9784	7.23e-30	128.874	3.94056	27.5274
CNAG_03910	ITR6	myo-inositol transporter, putative	1103	1397	1400	7249	7391	7195	1.25e-47	1.97802	1.4e-49	219.13	3.93951	46.9026
CNAG_12411	-	unspecified product	2	4	4	29	13	14	0.035179	1.9774	0.0182362	5.57332	3.93784	1.45372
CNAG_07449	-	amino acid transporter	380	303	361	2131	1866	1838	1.23e-39	1.97683	1.77e-41	182	3.93627	38.9091
CNAG_07443	HLH4	hypothetical protein	34	11	22	137	97	142	2.9505e-06	1.97283	6.35e-07	24.8034	3.92536	5.5301
CNAG_12209	-	unspecified product	68	19	60	306	228	288	3.03e-07	1.97227	5.52e-08	29.5264	3.92386	6.51867
CNAG_12598	-	unspecified product	54	24	40	212	185	265	6.31e-10	1.97106	7.62e-11	42.3518	3.92055	9.20009
CNAG_12295	-	unspecified product	11	7	20	77	42	96	0.000331256	1.9708	0.000104065	15.0615	3.91984	3.47984
CNAG_05746	-	Swi5-dependent recombination DNA repair protein 1, variant	54	54	79	330	356	354	1.1e-16	1.96782	5.96e-18	74.5339	3.91177	15.9589
CNAG_05608	-	hypothetical protein	455	592	323	2519	2341	2767	6.85e-23	1.96336	2.33e-24	103.717	3.89968	22.1642
CNAG_12970	-	unspecified product	6	8	3	37	12	47	0.0152655	1.9571	0.00708188	7.25208	3.88281	1.81629
CNAG_13085	-	unspecified product	68	62	108	474	291	561	2.32e-11	1.95173	2.3e-12	49.2108	3.86837	10.6351
CNAG_04060	-	hypothetical protein	63	28	56	261	262	285	6.31e-11	1.94998	6.69e-12	47.1155	3.86369	10.2002
CNAG_02899	-	hypothetical protein	17	4	12	53	64	64	0.00048507	1.94975	0.000157715	14.2778	3.86308	3.3142
CNAG_00526	-	hypothetical protein	26	13	11	84	95	95	9.71144e-06	1.94786	2.2795e-06	22.3438	3.85801	5.01272
CNAG_05046	-	hypothetical protein	16	7	16	98	53	63	0.000180612	1.94737	5.3875e-05	16.3066	3.85671	3.74325
CNAG_00627	-	specific transcriptional repressor	29	12	27	139	77	160	9.18342e-06	1.94151	2.13862e-06	22.4663	3.84108	5.037
CNAG_07753	-	hypothetical protein	608	527	624	3251	3102	3257	6.96e-61	1.94139	4.62e-63	280.966	3.84075	60.1571
CNAG_07022	-	hypothetical protein	34	48	42	261	233	178	2.78e-10	1.93797	3.2e-11	44.0491	3.83166	9.55555
CNAG_04695	-	hypothetical protein	40	12	38	212	111	169	1.37105e-05	1.93589	3.30246e-06	21.6323	3.82613	4.86295
CNAG_13131	-	unspecified product	27	16	33	117	149	147	1e-07	1.93508	1.69e-08	31.8178	3.824	6.99836
CNAG_03460	-	phosphoglycerate dehydrogenase	6	2	3	14	21	25	0.0291436	1.93471	0.0147047	5.95151	3.823	1.53546
CNAG_00664	-	hypothetical protein	30	39	54	239	216	213	3.64e-11	1.9338	3.73e-12	48.2602	3.8206	10.4389
CNAG_12476	-	unspecified product	6	5	8	40	31	32	0.00263348	1.93087	0.00101479	10.8004	3.81285	2.57947
CNAG_02924	-	histone H1/5	1130	905	1085	5728	5456	5726	5.06e-58	1.93022	3.67e-60	267.662	3.81114	57.296
CNAG_01384	-	hypothetical protein	88	81	71	410	412	482	2.72e-23	1.92941	8.98e-25	105.608	3.80899	22.566
CNAG_02448	-	hypothetical protein	10	3	9	39	31	50	0.00267717	1.92765	0.00103328	10.767	3.80435	2.57232
CNAG_13116	-	unspecified product	1	7	7	23	31	27	0.0174365	1.9265	0.00821979	6.98495	3.80131	1.75854
CNAG_04103	-	hypothetical protein	77	75	88	344	474	480	2.82e-17	1.92639	1.42e-18	77.36	3.80103	16.5499
CNAG_13087	-	unspecified product	53	45	45	224	263	287	8.5e-15	1.9257	5.64e-16	65.5578	3.79922	14.0706
CNAG_03043	-	hypothetical protein, variant 2	146	116	150	804	641	782	4.2e-28	1.92196	1.03e-29	128.167	3.78938	27.3773
CNAG_01001	-	hypothetical protein	103	72	151	548	565	645	2.11e-14	1.91971	1.46e-15	63.687	3.78347	13.6764
CNAG_12697	-	unspecified product	14	9	34	122	93	91	0.000131526	1.91897	3.81009e-05	16.9637	3.78152	3.88099
CNAG_03782	-	hypothetical protein	6	11	11	72	19	62	0.00444086	1.91741	0.00179425	9.74895	3.77745	2.35253
CNAG_12332	-	unspecified product	6	23	7	61	49	86	0.00142178	1.91652	0.000514834	12.0612	3.7751	2.84717
CNAG_02441	-	hypothetical protein	11	7	6	37	44	48	0.000930259	1.91618	0.000321181	12.9426	3.77422	3.0314
CNAG_06031	KRE63	beta-glucan synthesis-associated protein, variant	139	75	135	678	510	694	2.52e-15	1.91617	1.57e-16	68.0797	3.77419	14.5988
CNAG_05738	-	hypothetical protein	28	57	40	183	218	274	1.96e-09	1.9154	2.52e-10	40.0158	3.77218	8.70843
CNAG_04638	CSA1	hypothetical protein	124	104	121	596	591	688	2.95e-30	1.91353	6.45e-32	138.242	3.7673	29.5305
CNAG_04681	LPI14	transmembrane protein, putative	203	116	133	847	785	782	2.05e-18	1.9117	9.25e-20	82.7639	3.76251	17.6884
CNAG_12146	-	unspecified product	9	8	4	33	22	59	0.00587756	1.90395	0.00243905	9.18576	3.74236	2.2308
CNAG_06390	-	hypothetical protein	90	88	88	437	454	529	3.29e-25	1.9038	9.55e-27	114.615	3.74198	24.4825
CNAG_12368	-	unspecified product	133	90	143	698	545	713	5.26e-20	1.90373	2.16e-21	90.189	3.7418	19.2794
CNAG_02685	-	hypothetical protein	220	243	169	1420	856	1093	4.35e-18	1.90122	2e-19	81.2366	3.73529	17.3611
CNAG_04773	-	hypothetical protein	7	9	18	67	50	64	0.00030893	1.89795	9.64054e-05	15.2058	3.72684	3.51014
CNAG_03230	-	yippee-like, putative	119	108	142	651	532	784	3.64e-23	1.89514	1.21e-24	105.015	3.71959	22.4393
CNAG_06438	-	hypothetical protein	30	16	14	129	84	105	7.31784e-06	1.89503	1.67897e-06	22.9313	3.7193	5.13562
CNAG_06853	-	hypothetical protein, variant 2	100	88	151	597	584	611	1.27e-17	1.8936	6.09e-19	79.0385	3.7156	16.8972
CNAG_03193	-	hypothetical protein	106	89	110	516	493	609	6.28e-26	1.89348	1.75e-27	117.987	3.71531	25.202
CNAG_05026	-	mango esterase, variant 2	641	574	738	3658	3238	3425	1.05e-45	1.89338	1.23e-47	210.213	3.71505	44.9807
CNAG_06915	-	hypothetical protein	65	47	51	285	221	362	5.1e-13	1.89125	4.04e-14	57.1505	3.70956	12.2928
CNAG_01706	-	hypothetical protein	61	38	68	283	274	323	2.82e-13	1.8858	2.2e-14	58.3451	3.69557	12.5502
CNAG_06939	-	hypothetical protein	25	38	32	182	182	132	3.01e-08	1.88532	4.72e-09	34.3036	3.69436	7.52075
CNAG_04717	-	hypothetical protein	22	11	24	111	86	103	3.71165e-06	1.88489	8.11e-07	24.3305	3.69325	5.43043
CNAG_12821	-	unspecified product	139	57	156	651	516	687	1.01e-09	1.88305	1.25e-10	41.392	3.68853	8.99564
CNAG_13003	-	unspecified product	21	14	28	111	91	130	9.4e-07	1.8804	1.85e-07	27.1826	3.68177	6.02696
CNAG_03630	-	hypothetical protein	32	45	39	202	182	224	4.52e-12	1.87557	3.98e-13	52.6533	3.66948	11.3448
CNAG_03154	-	hypothetical protein, variant	979	931	828	5119	4255	4929	1.35e-56	1.87384	1.01e-58	261.055	3.66506	55.8706
CNAG_05238	-	hypothetical protein, variant	96	77	81	456	403	463	2.4e-22	1.8688	8.55e-24	101.144	3.6523	21.62
CNAG_01070	-	class II aldolase/adducin family protein	24	52	61	224	216	275	1.78e-08	1.86679	2.69e-09	35.3979	3.64719	7.75061
CNAG_06977	-	L-iditol 2-dehydrogenase	97	157	106	590	592	691	1.91e-18	1.86542	8.61e-20	82.9052	3.64375	17.7183
CNAG_12778	-	unspecified product	3	3	8	25	20	28	0.0189557	1.86532	0.00901518	6.81982	3.64349	1.72226
CNAG_01299	-	hypothetical protein, variant	17	7	18	100	58	59	0.000384129	1.86446	0.000122092	14.7601	3.64131	3.41552
CNAG_06015	-	hypothetical protein	17	27	27	132	105	131	1.19e-07	1.85946	2.02e-08	31.4713	3.62871	6.92497
CNAG_00834	-	phosphatidylserine decarboxylase, variant	475	1606	437	3692	5080	4179	0.0105093	1.85731	0.00468415	7.99752	3.62331	1.97843
CNAG_07600	-	Beta-glucosidase	705	777	727	3645	3844	3890	1.31e-59	1.85678	9.15e-62	275.017	3.62198	58.8841
CNAG_00177	-	hypothetical protein	48	39	68	209	239	358	1.02e-09	1.85673	1.25e-10	41.3785	3.62185	8.99309
CNAG_06307	-	hypothetical protein	70	55	80	326	296	441	8.36e-15	1.85462	5.54e-16	65.5948	3.61657	14.078
CNAG_02476	YRM101	putative transcription factor	337	330	367	1831	1641	1856	3.65e-53	1.85436	3.24e-55	244.975	3.6159	52.4372
CNAG_06666	-	starch phosphorylase	1337	1249	1054	6471	5575	6725	2.63e-52	1.85372	2.39e-54	240.989	3.6143	51.5799
CNAG_13036	-	unspecified product	13	13	19	79	76	76	1.28855e-05	1.85217	3.08788e-06	21.7612	3.61042	4.8899
CNAG_00859	-	hypothetical protein	897	827	1023	4811	4486	4775	6.24e-54	1.84799	5e-56	248.694	3.59997	53.2047
CNAG_03842	-	hypothetical protein	12	16	15	72	83	64	3.49205e-05	1.84758	9.07254e-06	19.6974	3.59897	4.45692
CNAG_03545	-	hypothetical protein, variant 2	318	434	338	1821	1834	1923	1.84e-33	1.8456	3.39e-35	153.245	3.59401	32.7361
CNAG_12633	-	unspecified product	10	10	22	77	56	83	0.000160075	1.84408	4.71979e-05	16.5575	3.59025	3.79568
CNAG_07947	0	hypothetical protein	45	23	36	183	161	187	3.51e-09	1.84165	4.7e-10	38.798	3.5842	8.45506
CNAG_02978	-	hypothetical protein	72	111	100	480	438	529	1.42e-18	1.83994	6.36e-20	83.5036	3.57994	17.8474
CNAG_06954	-	hypothetical protein	13	6	10	65	52	28	0.00344679	1.83203	0.00136422	10.2535	3.56038	2.46258
CNAG_00751	-	hypothetical protein	7	8	10	43	38	46	0.0010876	1.83153	0.000383528	12.6108	3.55914	2.96353
CNAG_08000	-	hypothetical protein	10	12	25	76	63	100	0.000144696	1.82426	4.23432e-05	16.7634	3.54125	3.83954
CNAG_07655	-	hypothetical protein	30	47	38	224	202	149	3.68e-08	1.82246	5.83e-09	33.8919	3.53684	7.43395
CNAG_03392	-	DNA supercoiling protein	332	361	417	2033	1649	1915	4.34e-37	1.8224	7.16e-39	170.066	3.53668	36.3621
CNAG_02523	-	hypothetical protein, variant	726	679	831	3803	3299	4182	5.12e-51	1.82066	4.85e-53	234.996	3.53242	50.2904
CNAG_06910	-	beta-lactamase	256	177	219	1162	1133	963	2.41e-21	1.82004	9.08e-23	96.4668	3.53092	20.6176
CNAG_00091	-	hypothetical protein	1584	3969	1107	11242	13268	8671	0.0104551	1.81986	0.00465614	8.00838	3.53048	1.98067
CNAG_12744	-	unspecified product	4	4	6	26	16	29	0.0195451	1.81948	0.00932818	6.75889	3.52953	1.70896
CNAG_00242	-	hypothetical protein	2	11	15	58	31	53	0.00831853	1.81942	0.00361257	8.46896	3.5294	2.07995
CNAG_12906	-	unspecified product	39	28	37	174	164	181	2.3e-10	1.80921	2.62e-11	44.4384	3.50451	9.63818
CNAG_01370	-	hypothetical protein	229	152	178	1027	863	893	8.62e-22	1.80897	3.18e-23	98.5443	3.50393	21.0647
CNAG_02707	-	hypothetical protein	7	14	7	57	27	57	0.00323112	1.80517	0.00127092	10.3843	3.4947	2.49065
CNAG_06958	-	hypothetical protein	13	6	10	62	53	27	0.00428773	1.80326	0.00172711	9.81908	3.49008	2.36777
CNAG_06521	-	hypothetical protein	208	153	171	906	941	778	1.25e-20	1.80232	4.83e-22	93.1567	3.48781	19.904
CNAG_07786	-	hypothetical protein	6	16	25	57	82	95	0.000809595	1.80035	0.000275838	13.2277	3.48305	3.09173
CNAG_03717	-	hypothetical protein	202	156	246	987	924	1089	1.56e-23	1.80029	5.04e-25	106.753	3.4829	22.8069
CNAG_05544	-	hypothetical protein	306	274	290	1450	1355	1498	1.7e-47	1.79605	1.95e-49	218.475	3.47267	46.7693
CNAG_06672	-	formate dehydrogenase	28	23	16	109	105	117	7.05e-07	1.79417	1.36e-07	27.779	3.46817	6.15184
CNAG_00057	FPP1	fructose-1,6-bisphosphatase I	3279	3563	2369	14798	15652	14888	4.23e-28	1.79347	1.05e-29	128.139	3.46648	27.3733
CNAG_00575	CAT3	Catalase 3	538	1039	463	3178	3381	3478	5.87e-12	1.78797	5.29e-13	52.0958	3.45329	11.2312
CNAG_06209	-	hypothetical protein	10	7	9	36	27	67	0.00396414	1.78719	0.00158751	9.97418	3.45141	2.40185
CNAG_13048	-	unspecified product	2	9	6	23	19	43	0.0253534	1.78592	0.0125785	6.22744	3.44838	1.59596
CNAG_04506	-	hypothetical protein	18	13	38	127	97	115	4.68918e-05	1.78518	1.23928e-05	19.1018	3.44662	4.3289
CNAG_07041	-	hypothetical protein	7	5	28	68	76	50	0.00754265	1.78327	0.00323667	8.66901	3.44207	2.12248
CNAG_13186	-	unspecified product	73	89	105	390	397	527	2.22e-16	1.78156	1.26e-17	73.0487	3.43798	15.6533
CNAG_06761	-	siderophore-iron transporter Str1	440	283	601	2378	1987	2093	3.41e-14	1.77891	2.42e-15	62.6921	3.43167	13.4669
CNAG_02430	-	ABC transporter ABCC.6	469	340	488	2286	1935	2101	6.8e-28	1.77666	1.72e-29	127.15	3.42632	27.1676
CNAG_03873	-	hypothetical protein, variant	603	1511	394	3922	4305	3965	0.00988246	1.77322	0.00437438	8.12148	3.41817	2.00513
CNAG_04385	-	hypothetical protein	10	0	8	33	20	35	0.049234	1.77086	0.0266601	4.91269	3.41257	1.30774
CNAG_13175	-	unspecified product	19	11	19	91	76	70	5.13672e-05	1.7701	1.37118e-05	18.9088	3.41077	4.28931
CNAG_01002	-	hypothetical protein	613	335	588	2756	2227	2464	1.01e-16	1.76939	5.39e-18	74.731	3.4091	15.9973
CNAG_00035	-	hypothetical protein	308	334	244	1549	1413	1321	5.54e-25	1.76817	1.63e-26	113.551	3.40622	24.2567
CNAG_13050	-	unspecified product	13	8	10	55	37	59	0.000897007	1.76532	0.000308818	13.0161	3.3995	3.0472
CNAG_12530	-	unspecified product	25	14	32	103	104	138	5.31461e-06	1.76481	1.19257e-06	23.5892	3.39828	5.27453
CNAG_12438	-	unspecified product	78	71	93	412	350	410	7.37e-18	1.76413	3.46e-19	80.1538	3.39668	17.1323
CNAG_12282	-	unspecified product	5	8	14	35	27	71	0.00824043	1.76125	0.00357359	8.4887	3.38992	2.08405
CNAG_06238	-	Glutathione S-transferase	105	123	89	493	444	600	5.18e-19	1.76027	2.27e-20	85.5363	3.38763	18.2855
CNAG_06698	HAD9	phosphatase	287	435	278	1689	1489	1650	1.5e-20	1.75987	5.87e-22	92.7717	3.38668	19.8236
CNAG_02488	-	methionyl-tRNA formyltransferase	144	105	136	662	518	682	1.15e-20	1.75938	4.43e-22	93.3265	3.38552	19.9399
CNAG_06014	-	hypothetical protein	13	18	26	87	72	118	3.27999e-05	1.75768	8.46513e-06	19.8298	3.38155	4.48413
CNAG_06372	-	hypothetical protein	36	50	35	224	159	200	2.38e-09	1.75458	3.11e-10	39.6012	3.37429	8.62325
CNAG_01131	-	hypothetical protein	969	532	581	3712	2929	3334	2.94e-16	1.75184	1.69e-17	72.4778	3.36789	15.5323
CNAG_06516	-	hypothetical protein	665	346	558	2564	2187	2778	6.04e-17	1.74976	3.14e-18	75.7984	3.36303	16.2189
CNAG_07972	-	hypothetical protein	225	187	198	946	784	1199	2.53e-24	1.74318	7.94e-26	110.417	3.34772	23.5965
CNAG_02206	-	hypothetical protein, variant	4	4	5	14	30	17	0.0433205	1.73918	0.023101	5.16089	3.33845	1.36331
CNAG_04585	-	hypothetical protein	159	171	175	965	660	777	3.07e-20	1.73865	1.25e-21	91.2715	3.33724	19.5131
CNAG_00871	CLR3	hypothetical protein, variant	176	168	245	950	834	1017	2.97e-22	1.7362	1.07e-23	100.704	3.33156	21.5266
CNAG_12782	-	unspecified product	22	12	35	120	105	101	5.08402e-05	1.7351	1.35488e-05	18.9316	3.32902	4.29379
CNAG_02681	APH3	Phytase	594	521	565	2835	2417	2708	1.74e-48	1.73418	1.79e-50	223.223	3.32691	47.7607
CNAG_12963	-	unspecified product	429	350	422	1940	1730	2026	7.96e-42	1.73407	1.05e-43	192.208	3.32665	41.0988
CNAG_00476	-	hypothetical protein	14	3	22	65	68	50	0.00604915	1.73398	0.00252141	9.12499	3.32645	2.21831
CNAG_06099	-	hypothetical protein	28	35	40	171	134	185	8.63e-09	1.73314	1.23e-09	36.9238	3.32452	8.06412
CNAG_04598	-	hypothetical protein, variant	273	183	302	1232	1034	1330	1.51e-19	1.73204	6.46e-21	88.0245	3.32197	18.8208
CNAG_05870	-	hypothetical protein, variant	54	34	79	250	274	260	2.71e-08	1.72582	4.21e-09	34.5257	3.30769	7.56654
CNAG_03050	-	hypothetical protein	129	153	138	676	546	767	9.74e-23	1.72561	3.34e-24	103.006	3.30719	22.0114
CNAG_04486	-	hypothetical protein	37	34	45	195	161	191	5.41e-10	1.72538	6.46e-11	42.6755	3.30666	9.26707
CNAG_13043	-	unspecified product	54	56	54	256	219	300	2.31e-13	1.72362	1.78e-14	58.7666	3.30263	12.6357
CNAG_01191	-	long-chain fatty acid transporter, variant 2	595	504	590	2644	2474	2825	1.27e-50	1.72242	1.22e-52	233.157	3.29989	49.895
CNAG_03833	-	hypothetical protein	5	5	6	31	13	32	0.027043	1.71964	0.0135065	6.10152	3.29354	1.56795
CNAG_01077	-	hypothetical protein	102	96	98	442	472	470	1.44e-20	1.7176	5.6e-22	92.8643	3.2889	19.8412
CNAG_12620	-	unspecified product	14	3	18	53	43	69	0.00551998	1.71713	0.00227437	9.31378	3.28783	2.25806
CNAG_04589	-	hypothetical protein	147	236	215	1006	793	1009	9.23e-18	1.71572	4.37e-19	79.6947	3.28461	17.0348
CNAG_03644	CAS3	capsule related protein	113	74	155	559	493	547	1.16e-11	1.71563	1.1e-12	50.6601	3.2844	10.9344
CNAG_07872	-	hypothetical protein	4	5	4	26	14	21	0.0381056	1.71361	0.0200016	5.41176	3.27982	1.41901
CNAG_06336	-	glucan 1,3-beta-glucosidase	1259	1454	1178	6603	5444	6119	1.2e-40	1.71215	1.64e-42	186.741	3.27649	39.9213
CNAG_00887	-	hypothetical protein	3	5	8	13	28	34	0.0368271	1.71119	0.0192128	5.48204	3.27431	1.43383
CNAG_07357	-	hypothetical protein	4	7	6	20	35	23	0.0236534	1.70115	0.0116275	6.36681	3.2516	1.62611
CNAG_04552	ITR1A	putative myo-inositol transporter	9	24	15	84	46	95	0.00098275	1.69999	0.000341117	12.8299	3.24899	3.00756
CNAG_12351	-	unspecified product	28	13	28	107	107	104	1.62239e-05	1.69893	3.97368e-06	21.2775	3.2466	4.78985
CNAG_01977	FZC39	hypothetical protein	14	15	33	104	73	110	0.000157637	1.69169	4.64403e-05	16.5882	3.23036	3.80234
CNAG_00828	SIP401	pathway-specific nitrogen regulator	313	372	277	1539	1465	1401	8.58e-26	1.68882	2.39e-27	117.359	3.22393	25.0665
CNAG_00798	-	hypothetical protein	24	34	30	141	127	136	1.13e-07	1.68864	1.93e-08	31.5682	3.22352	6.94538
CNAG_05310	-	nipsnap family protein	36	36	27	148	148	157	1.75e-08	1.68449	2.64e-09	35.436	3.21427	7.7576
CNAG_12409	-	unspecified product	23	13	32	96	111	103	4.0303e-05	1.68389	1.05651e-05	19.4064	3.21294	4.39466
CNAG_06935	-	isochorismatase hydrolase	513	421	580	2290	2327	2239	1.86e-28	1.67349	4.49e-30	129.817	3.18985	27.7294
CNAG_00033	-	hypothetical protein	16	6	33	73	89	87	0.00257403	1.67256	0.000988839	10.8483	3.1878	2.58939
CNAG_01194	-	hypothetical protein	34	33	30	168	139	130	1.27e-07	1.66637	2.17e-08	31.3324	3.17416	6.89609
CNAG_05666	-	hypothetical protein	26	9	10	59	69	75	0.00147445	1.66532	0.000537533	11.9807	3.17183	2.83137
CNAG_12501	-	unspecified product	6	7	2	24	19	25	0.0378443	1.66527	0.0198365	5.42623	3.17173	1.422
CNAG_06389	-	hypothetical protein	27	22	45	169	116	139	6.12677e-06	1.66203	1.38837e-06	23.2967	3.16461	5.21277
CNAG_04894	-	hypothetical protein	22	21	11	81	64	100	0.000141674	1.6614	4.13716e-05	16.8074	3.16322	3.84871
CNAG_05341	-	hypothetical protein	129	96	110	540	371	609	6.96e-14	1.66091	5.07e-15	61.2318	3.16216	13.1575
CNAG_04225	-	hypothetical protein	101	67	162	533	415	541	1.09e-08	1.6595	1.57e-09	36.4405	3.15908	7.9634
CNAG_02156	-	hypothetical protein	410	430	372	1982	1460	2029	1.47e-29	1.65743	3.37e-31	134.958	3.15454	28.8338
CNAG_01078	-	aldehyde dehydrogenase (NAD)	1521	1443	1588	5244	7211	7926	3.04e-26	1.65111	8.31e-28	119.459	3.14074	25.5165
CNAG_04508	-	hypothetical protein	128	78	160	562	510	563	2.48e-11	1.65015	2.47e-12	49.0669	3.13867	10.6059
CNAG_12364	-	unspecified product	28	26	33	104	126	160	9.57e-07	1.64835	1.89e-07	27.1423	3.13476	6.01926
CNAG_02192	-	hypothetical protein	3	11	30	37	54	109	0.0276653	1.64706	0.0138888	6.05222	3.13194	1.55806
CNAG_00759	-	hypothetical protein	42	30	35	152	147	179	1.6e-08	1.64638	2.4e-09	35.6177	3.13047	7.795
CNAG_04255	-	hypothetical protein	284	308	263	1266	1123	1427	7.94e-34	1.64302	1.44e-35	154.938	3.12319	33.1002
CNAG_12629	-	unspecified product	43	31	67	219	148	266	1.92167e-06	1.64248	4e-07	25.6965	3.12201	5.71632
CNAG_02103	-	hypothetical protein, variant	739	830	874	3610	3361	3909	7.81e-49	1.64245	7.87e-51	224.861	3.12195	48.1074
CNAG_04582	-	hypothetical protein	96	100	99	401	373	537	2.66e-16	1.63262	1.52e-17	72.6826	3.10076	15.5746
CNAG_04789	-	hypothetical protein	1138	1341	1188	5214	5303	5668	1.1e-47	1.63189	1.21e-49	219.416	3.09919	46.9602
CNAG_03532	-	3-beta hydroxysteroid dehydrogenase/isomerase	14	4	18	46	58	54	0.00591024	1.6297	0.00245406	9.17453	3.09448	2.22839
CNAG_05067	CLR5	hypothetical protein	11	6	14	61	31	45	0.00625179	1.62965	0.00261971	9.05504	3.09437	2.204
CNAG_00542	-	Salicylate hydroxylase	148	119	144	589	568	656	1.86e-22	1.6296	6.51e-24	101.683	3.09427	21.7307
CNAG_03740	-	hypothetical protein	43	16	44	174	125	155	3.45205e-05	1.62908	8.94389e-06	19.7247	3.09316	4.46192
CNAG_02049	PUT1	Proline dehydrogenase	28	34	8	91	101	117	0.000769983	1.62893	0.000261111	13.3306	3.09284	3.11352
CNAG_06020	-	hypothetical protein	54	52	62	274	268	191	1.35e-08	1.6279	2e-09	35.9781	3.09064	7.86853
CNAG_01934	-	hypothetical protein	50	21	48	187	123	218	1.45509e-05	1.62755	3.52457e-06	21.5075	3.08989	4.83711
CNAG_13000	-	unspecified product	18	7	14	61	47	64	0.00152131	1.6266	0.00055686	11.9149	3.08784	2.81778
CNAG_06867	-	hypothetical protein	361	412	460	1745	1731	1943	7.73e-34	1.62426	1.4e-35	155.004	3.08284	33.1117
CNAG_05818	CHS5	Chitin synthase	2628	2423	2369	11247	10171	11116	6.23e-63	1.62287	3.83e-65	290.519	3.07986	62.2053
CNAG_03327	-	hypothetical protein	66	52	67	292	238	282	4.29e-12	1.62235	3.77e-13	52.7577	3.07876	11.3673
CNAG_02603	-	early growth response protein 1	232	228	205	1003	874	1042	5.79e-31	1.62149	1.24e-32	141.521	3.07693	30.2376
CNAG_07708	-	hypothetical protein	144	95	140	510	526	627	1.14e-15	1.62105	7e-17	69.6736	3.076	14.9438
CNAG_03366	ZNF2	C2H2 type zinc finger transcription factor	425	409	554	2104	1903	2041	8.1e-27	1.61422	2.12e-28	122.168	3.06146	26.0917
CNAG_03461	-	hypothetical protein	197	99	153	736	571	648	3.78e-11	1.61379	3.9e-12	48.173	3.06054	10.4222
CNAG_04034	-	hypothetical protein	76	71	111	367	323	436	5.87e-12	1.60907	5.28e-13	52.0963	3.05055	11.2312
CNAG_06668	-	mitochondrial protein	725	1301	439	3458	3669	3567	0.00153652	1.60855	0.000563561	11.8926	3.04946	2.81346
CNAG_01713	-	hypothetical protein	2124	1811	1745	8351	7567	8704	3.05e-48	1.6049	3.18e-50	222.079	3.04174	47.5162
CNAG_02155	-	hypothetical protein	33	16	37	138	109	125	2.28382e-05	1.60325	5.71445e-06	20.5815	3.03827	4.64134
CNAG_04461	HFM1	ATP-dependent DNA helicase HFM1/MER3	30	26	62	194	149	167	1.70805e-05	1.60174	4.19819e-06	21.1722	3.03509	4.7675
CNAG_05523	-	hypothetical protein	25	16	25	102	82	101	2.41503e-05	1.59807	6.0873e-06	20.4606	3.02738	4.61708
CNAG_03734	-	hypothetical protein, variant 2	349	261	343	1404	1266	1438	8.34e-27	1.59743	2.2e-28	122.1	3.02605	26.0787
CNAG_00443	-	hypothetical protein	171	132	208	775	668	757	9.9e-17	1.59574	5.29e-18	74.768	3.02249	16.0044
CNAG_12173	-	unspecified product	20	8	15	65	54	66	0.00115468	1.59375	0.000409172	12.4898	3.01832	2.93754
CNAG_06877	-	hypothetical protein	12	5	7	40	30	33	0.013193	1.59374	0.00601497	7.54581	3.0183	1.87966
CNAG_12765	-	unspecified product	17	9	13	68	49	50	0.00170343	1.59223	0.000629179	11.6876	3.01516	2.76867
CNAG_03132	-	hypothetical protein	27	16	22	105	73	101	5.61359e-05	1.58697	1.51021e-05	18.7246	3.00417	4.25076
CNAG_12285	-	unspecified product	54	52	43	199	183	256	1.27e-09	1.58042	1.59e-10	40.9096	2.99058	8.89703
CNAG_04217	PCK1	phosphoenolpyruvate carboxykinase (ATP)	1063	2418	808	6205	6053	6002	0.00629648	1.58008	0.00264076	9.04041	2.98986	2.2009
CNAG_06163	-	hypothetical protein	24	9	22	77	74	83	0.000522456	1.57965	0.000171454	14.1206	2.98898	3.28195
CNAG_06290	HXT2	Low-affinity glucose transporter HXT2	188	391	176	906	1048	1276	3.47e-08	1.57963	5.45e-09	34.0209	2.98894	7.46004
CNAG_12753	-	unspecified product	26	16	26	98	93	98	2.5822e-05	1.57915	6.54042e-06	20.3232	2.98793	4.58801
CNAG_05941	-	hypothetical protein	75	68	67	315	277	301	2.15e-13	1.57869	1.64e-14	58.9179	2.98699	12.6677
CNAG_12344	-	unspecified product	4	5	11	33	32	19	0.0371708	1.57631	0.0194241	5.46293	2.98206	1.4298
CNAG_05184	-	glycosyl transferase family 8 protein	14	13	13	66	46	58	0.000923694	1.57455	0.000318688	12.9572	2.97843	3.03447
CNAG_13191	-	unspecified product	8	5	5	28	17	32	0.0320046	1.57399	0.0163978	5.75971	2.97727	1.49479
CNAG_06932	-	Sugar transporter	35	40	31	200	131	116	1.10766e-05	1.57286	2.63263e-06	22.0673	2.97495	4.95559
CNAG_05426	-	hypothetical protein	52	49	74	222	203	322	1.93e-08	1.57134	2.93e-09	35.2275	2.9718	7.71404
CNAG_12005	-	unspecified product	32	16	21	92	78	124	0.000105847	1.571	3.01479e-05	17.4085	2.9711	3.97532
CNAG_07421	-	hypothetical protein	46	38	75	246	171	259	6.8e-07	1.56924	1.31e-07	27.8559	2.96749	6.16746
CNAG_04476	-	hypothetical protein	41	31	50	205	134	177	6.97e-07	1.56682	1.34e-07	27.8029	2.96251	6.15666
CNAG_07520	-	endopeptidase, variant 1	65	46	100	303	231	361	2.71e-07	1.56433	4.91e-08	29.7519	2.9574	6.56627
CNAG_04446	-	hypothetical protein	113	104	169	617	465	545	9.16e-12	1.56427	8.52e-13	51.1586	2.95728	11.0381
CNAG_13124	-	unspecified product	39	52	58	219	209	195	1.43e-08	1.55785	2.11e-09	35.8658	2.94415	7.84566
CNAG_02586	-	Sugar transporter	77	38	68	324	214	227	1.31031e-06	1.5575	2.63e-07	26.5045	2.94344	5.88263
CNAG_02553	-	Short-chain dehydrogenase	418	296	253	1420	1403	1201	6.75e-14	1.55614	4.91e-15	61.2982	2.94065	13.1707
CNAG_04831	-	hypothetical protein	387	319	364	1476	1432	1569	7.69e-34	1.5551	1.38e-35	155.028	2.93854	33.114
CNAG_12198	-	unspecified product	9	15	19	73	47	60	0.00191835	1.55161	0.00071658	11.4457	2.93143	2.71707
CNAG_05018	-	hypothetical protein, variant	108	96	100	482	338	452	5.99e-14	1.55022	4.33e-15	61.5438	2.92861	13.2226
CNAG_04280	-	hypothetical protein	51	36	69	252	154	248	1.48926e-06	1.5484	3.02e-07	26.2348	2.92493	5.82703
CNAG_12179	-	unspecified product	6	6	19	48	41	39	0.0168253	1.53989	0.00790065	7.05586	2.90773	1.77404
CNAG_04143	-	hypothetical protein, variant	8	4	27	55	45	62	0.0239421	1.53792	0.0118047	6.33996	2.90375	1.62084
CNAG_07188	-	hypothetical protein	309	232	382	1381	1169	1259	7.96e-16	1.53654	4.82e-17	70.4074	2.90098	15.0992
CNAG_01047	-	hypothetical protein	212	139	93	1001	447	370	0.01642	1.53555	0.00768276	7.10597	2.89899	1.78463
CNAG_02776	-	hypothetical protein	152	136	170	699	514	681	6.34e-17	1.53316	3.33e-18	75.6854	2.89419	16.1982
CNAG_00601	CEL1	glycosyl hydrolase	345	247	346	1458	1193	1200	2.89e-17	1.53162	1.46e-18	77.3068	2.8911	16.5392
CNAG_07444	-	hypothetical protein	105	63	161	489	473	379	1.51703e-06	1.52798	3.08e-07	26.1968	2.88382	5.81901
CNAG_06955	-	hypothetical protein	30	30	49	127	153	167	3.72706e-06	1.52481	8.15e-07	24.3215	2.87749	5.42863
CNAG_07785	-	hypothetical protein	14	5	10	54	17	49	0.0310532	1.52109	0.0157767	5.82759	2.87008	1.50789
CNAG_13118	-	unspecified product	10	16	6	62	30	39	0.0155563	1.5204	0.007234	7.21393	2.8687	1.80809
CNAG_12064	-	unspecified product	42	13	41	148	111	133	0.000406705	1.51998	0.000130068	14.6408	2.86788	3.39072
CNAG_00485	-	hypothetical protein	227	626	234	1597	1185	1691	0.00718459	1.51918	0.0030627	8.76973	2.86629	2.1436
CNAG_07512	-	hypothetical protein	277	393	311	1300	1095	1633	3.27e-17	1.51641	1.67e-18	77.0512	2.86078	16.4851
CNAG_12811	-	unspecified product	55	29	55	189	172	205	6.91e-07	1.5142	1.33e-07	27.8213	2.8564	6.16024
CNAG_03259	-	hypothetical protein	77	23	72	247	185	270	0.000119308	1.5131	3.42287e-05	17.1672	2.85423	3.92333
CNAG_13059	-	unspecified product	24	29	31	132	118	89	4.4742e-05	1.51291	1.17948e-05	19.1962	2.85385	4.34928
CNAG_01841	GLN3	GATA family transcription factor	45	42	37	194	117	196	1.37932e-06	1.51103	2.78e-07	26.3982	2.85014	5.86033
CNAG_05656	-	hypothetical protein	101	87	112	371	374	474	4.6e-14	1.50767	3.29e-15	62.0864	2.8435	13.3371
CNAG_12929	-	unspecified product	27	20	15	91	75	85	0.000193733	1.50731	5.81223e-05	16.1629	2.84279	3.7128
CNAG_12171	-	unspecified product	11	6	5	36	23	30	0.0285475	1.50419	0.0143703	5.99208	2.83664	1.54443
CNAG_06931	-	Beta-glucosidase	51	40	31	212	133	147	9.63171e-06	1.50366	2.25486e-06	22.3647	2.83562	5.0163
CNAG_05185	-	hypothetical protein	134	88	181	533	512	583	1.17e-09	1.50356	1.46e-10	41.082	2.83542	8.93065
CNAG_05971	-	hypothetical protein	100	61	84	341	265	387	1.1e-09	1.50162	1.37e-10	41.2122	2.8316	8.95785
CNAG_03692	-	hypothetical protein	420	353	474	1616	1653	1738	2.28e-25	1.49681	6.57e-27	115.357	2.82219	24.6413
CNAG_05180	-	hypothetical protein	444	349	445	1768	1445	1760	4.5e-25	1.4937	1.31e-26	113.988	2.8161	24.3468
CNAG_12515	-	unspecified product	24	25	26	96	96	109	1.48444e-05	1.49307	3.60844e-06	21.4624	2.81486	4.82844
CNAG_12720	-	unspecified product	54	31	67	222	189	197	2.31292e-06	1.49275	4.91e-07	25.3006	2.81426	5.63584
CNAG_12570	-	unspecified product	9	9	12	48	19	55	0.0200808	1.49097	0.0096293	6.70222	2.81077	1.69722
CNAG_13025	-	unspecified product	56	17	45	153	161	156	0.000216108	1.48989	6.54727e-05	15.9374	2.80868	3.66533
CNAG_07574	-	hypothetical protein	33	30	25	118	87	150	2.29603e-05	1.48934	5.75349e-06	20.5685	2.80761	4.63902
CNAG_07626	-	NAD-binding Rossmann fold oxidoreductase	471	294	531	1842	1597	1736	3.37e-13	1.48919	2.64e-14	57.9891	2.80732	12.473
CNAG_00848	-	hypothetical protein, variant 2	1367	2839	1337	7841	7994	6163	0.00170761	1.48741	0.000631351	11.6812	2.80384	2.76761
CNAG_00653	-	hypothetical protein, variant 2	98	69	109	383	334	385	2.88e-11	1.48657	2.92e-12	48.7437	2.80221	10.5402
CNAG_03224	-	hypothetical protein	6	17	9	33	45	50	0.0143992	1.48571	0.0066428	7.3671	2.80055	1.84166
CNAG_03294	-	hypothetical protein	160	171	154	645	553	744	9.63e-20	1.48491	4.06e-21	88.9449	2.799	19.0165
CNAG_06349	-	hypothetical protein	51	27	42	148	126	208	1.09661e-05	1.4842	2.605e-06	22.0875	2.79761	4.95995
CNAG_03211	-	hypothetical protein	41	23	64	175	164	169	5.7937e-05	1.48141	1.56579e-05	18.6557	2.79222	4.23704
CNAG_00679	-	hypothetical protein	30	7	26	108	58	85	0.00633978	1.48098	0.0026597	9.02735	2.79139	2.19793
CNAG_02044	-	hypothetical protein	71	41	51	297	180	167	2.14328e-05	1.47985	5.33118e-06	20.7145	2.7892	4.66892
CNAG_05632	-	hypothetical protein	275	332	221	1056	1066	1168	1.05e-17	1.47939	5e-19	79.4297	2.78831	16.9776
CNAG_05821	-	hypothetical protein	11	8	6	31	26	43	0.0196873	1.47832	0.00941398	6.74255	2.78624	1.70581
CNAG_06066	-	nucleoside-diphosphate-sugar epimerase	39	21	26	114	94	134	5.08402e-05	1.47509	1.35524e-05	18.9311	2.78001	4.29379
CNAG_01611	LIV8	infection related protein of unknown function	146	124	231	692	591	703	2.91e-10	1.47477	3.36e-11	43.9564	2.77939	9.53592
CNAG_01710	-	hypothetical protein	36	40	38	134	140	179	4.27e-07	1.47466	7.98e-08	28.8104	2.77919	6.36977
CNAG_06651	-	amidohydrolase	13	4	24	46	57	59	0.0184682	1.47441	0.00876062	6.87099	2.77871	1.73358
CNAG_12374	-	unspecified product	6	8	7	25	21	38	0.0314848	1.47418	0.0160773	5.79441	2.77826	1.5019
CNAG_06956	-	hypothetical protein	446	450	444	1683	1340	2309	6.4e-18	1.46729	2.99e-19	80.4434	2.76502	17.1936
CNAG_06693	-	hypothetical protein	467	420	445	1861	1482	1918	3.56e-30	1.46714	7.84e-32	137.854	2.76472	29.4482
CNAG_04029	-	Cytochrome P450	278	206	407	1242	1086	1176	1.06e-10	1.4667	1.16e-11	46.0388	2.7639	9.97589
CNAG_12786	-	unspecified product	64	86	62	268	252	317	4.38e-10	1.46582	5.17e-11	43.1129	2.7622	9.35834
CNAG_12732	-	unspecified product	22	15	27	83	70	100	0.000295919	1.46563	9.20177e-05	15.2938	2.76184	3.52883
CNAG_06786	-	hypothetical protein	426	284	449	1574	1406	1573	3.26e-16	1.46437	1.88e-17	72.268	2.75943	15.4871
CNAG_01777	-	glyoxylate reductase	1606	1797	1299	5723	6254	6453	2.71e-24	1.46179	8.57e-26	110.267	2.75451	23.5669
CNAG_06893	-	hypothetical protein	1922	1566	1572	6730	6025	7118	1.35e-36	1.46179	2.26e-38	167.78	2.75449	35.8692
CNAG_05548	-	hypothetical protein	256	184	214	792	788	990	5.39e-18	1.46022	2.51e-19	80.7937	2.7515	17.2683
CNAG_06463	-	hypothetical protein, variant	56	30	36	146	182	146	1.91078e-05	1.45846	4.71997e-06	20.9477	2.74815	4.71879
CNAG_00160	-	hypothetical protein	134	70	163	469	378	599	6.33e-07	1.45759	1.21e-07	28.0036	2.74649	6.19836
CNAG_12230	-	unspecified product	7	13	14	42	44	47	0.00757221	1.45675	0.00325122	8.66084	2.7449	2.12078
CNAG_00826	DAK101	dihydroxyacetone kinase	78	42	60	294	171	240	3.97171e-06	1.45584	8.73e-07	24.19	2.74316	5.40102
CNAG_06286	-	hypothetical protein	170	154	173	727	608	599	4.02e-16	1.454	2.37e-17	71.8081	2.73966	15.3959
CNAG_12421	-	unspecified product	17	17	24	67	61	100	0.000704174	1.45189	0.00023663	13.5153	2.73567	3.15232
CNAG_05693	-	hypothetical protein	150	135	209	683	572	667	5.26e-13	1.44847	4.18e-14	57.0816	2.72919	12.2787
CNAG_05358	-	hypothetical protein	7	7	9	35	20	35	0.0291486	1.44714	0.0147123	5.9506	2.72667	1.53538
CNAG_01835	-	hypothetical protein	1365	1481	1417	5399	5262	5877	1.2e-51	1.44464	1.11e-53	237.934	2.72195	50.9197
CNAG_12996	-	unspecified product	10	20	9	48	52	51	0.00706956	1.44404	0.00300759	8.80286	2.72082	2.15061
CNAG_07542	-	hypothetical protein	251	219	272	976	907	986	4.25e-23	1.44144	1.43e-24	104.692	2.71592	22.3716
CNAG_12217	-	unspecified product	172	245	310	1021	663	1155	4.61e-09	1.44061	6.31e-10	38.2233	2.71436	8.33639
CNAG_02415	ANXC3.1	annexin XIV	4025	3654	3056	14295	14516	12373	2.33e-21	1.43834	8.75e-23	96.538	2.71009	20.6318
CNAG_05015	CAT4	catalase 4	163	200	189	642	655	840	2.41e-17	1.43646	1.21e-18	77.6903	2.70656	16.6182
CNAG_12051	-	unspecified product	7	13	16	56	30	54	0.0128648	1.43645	0.00585586	7.59413	2.70653	1.8906
CNAG_01165	LCB5	D-erythro-sphingosine kinase	1429	1695	1395	5663	5916	5774	1.46e-29	1.43405	3.34e-31	134.979	2.70205	28.836
CNAG_12938	-	unspecified product	12	3	17	31	36	57	0.0368271	1.4322	0.0192124	5.48208	2.69857	1.43383
CNAG_12835	-	unspecified product	14	6	16	41	32	67	0.0166642	1.43058	0.00781882	7.07451	2.69555	1.77822
CNAG_06652	-	allantoate permease	195	220	325	1042	830	969	8.36e-12	1.42888	7.69e-13	51.3607	2.69237	11.0779
CNAG_01960	-	efflux protein EncT	101	62	91	300	361	307	2.32e-08	1.42861	3.57e-09	34.8469	2.69188	7.63509
CNAG_07835	-	hypothetical protein	23	10	33	85	83	84	0.00230267	1.42629	0.000874296	11.0765	2.68754	2.63777
CNAG_12742	-	unspecified product	9	9	9	32	29	43	0.0164698	1.42619	0.0077114	7.0993	2.68737	1.78331
CNAG_02164	-	hypothetical protein	1089	1443	1113	4334	4227	5443	1.14e-22	1.42486	3.96e-24	102.671	2.68489	21.9413
CNAG_07405	-	hypothetical protein, variant	168	164	180	578	592	796	1.52e-16	1.42359	8.38e-18	73.8617	2.68253	15.8188
CNAG_03746	-	hypothetical protein	23	36	53	158	106	167	0.000148977	1.42327	4.37057e-05	16.7033	2.68193	3.82688
CNAG_07993	-	hypothetical protein	27	11	41	118	81	103	0.00272766	1.42266	0.00105511	10.7283	2.68079	2.56421
CNAG_01702	-	Integral membrane protein	509	454	581	2246	1789	1848	1.41e-19	1.42259	5.99e-21	88.1748	2.68067	18.8513
CNAG_06918	-	hypothetical protein	64	38	22	158	178	133	0.000455776	1.42252	0.000147218	14.4075	2.68053	3.34125
CNAG_00414	MAK32	Maintenance of killer protein 32, putative	454	422	418	1629	1545	1766	1.07e-35	1.42124	1.82e-37	163.633	2.67815	34.9697
CNAG_00054	-	hypothetical protein	26	27	40	119	98	139	3.69406e-05	1.41878	9.63826e-06	19.5818	2.67359	4.4325
CNAG_06622	-	hypothetical protein, variant	89	123	92	380	321	464	1.4e-10	1.41861	1.55e-11	45.4655	2.67327	9.85316
CNAG_12034	-	unspecified product	10	6	5	31	22	27	0.0430952	1.41841	0.0229597	5.17155	2.67292	1.36557
CNAG_00833	-	hypothetical protein	29	22	29	107	116	78	0.000289248	1.41584	8.96943e-05	15.3421	2.66814	3.53873
CNAG_04816	-	hypothetical protein	416	809	368	2095	1872	2097	5.45e-08	1.4155	8.88e-09	33.0724	2.66753	7.26361
CNAG_04495	-	hypothetical protein	48	28	61	174	120	232	0.000103548	1.41478	2.94234e-05	17.4547	2.66619	3.98486
CNAG_04960	-	hypothetical protein	59	52	63	176	210	278	1.44e-07	1.41475	2.48e-08	31.08	2.66614	6.84161
CNAG_04869	PNB1	para-nitrobenzyl esterase	945	736	784	3170	3050	3092	1.01e-26	1.41071	2.7e-28	121.686	2.65868	25.9963
CNAG_13188	-	unspecified product	37	27	46	127	126	165	1.27677e-05	1.41034	3.05808e-06	21.7798	2.65801	4.89389
CNAG_12135	-	unspecified product	21	23	10	72	43	92	0.00553199	1.40991	0.00228068	9.3087	2.6572	2.25712
CNAG_12057	-	unspecified product	39	28	52	164	119	168	2.12117e-05	1.40589	5.27097e-06	20.7362	2.64981	4.67343
CNAG_05439	CMK1	CAMK/CAMK1/CAMK1-CMK protein kinase	709	703	708	2729	2549	2706	3.71e-40	1.40396	5.2e-42	184.438	2.64628	39.4303
CNAG_12676	-	unspecified product	70	70	93	340	238	302	9.78e-09	1.40373	1.4e-09	36.6632	2.64585	8.00981
CNAG_00107	-	hypothetical protein	919	2550	861	5230	5365	5743	0.0171554	1.4024	0.00807041	7.01778	2.64341	1.7656
CNAG_12585	-	unspecified product	114	48	150	396	365	411	3.90119e-05	1.40014	1.02075e-05	19.4722	2.63928	4.4088
CNAG_07845	-	hypothetical protein, variant 2	28	55	19	118	117	149	0.000817379	1.39512	0.000278892	13.2071	2.63011	3.08758
CNAG_12511	-	unspecified product	20	37	10	118	72	59	0.0123356	1.39125	0.00558615	7.67918	2.62307	1.90884
CNAG_02061	-	hypothetical protein	342	308	414	1320	1111	1563	4.99e-18	1.39043	2.31e-19	80.9563	2.62156	17.3018
CNAG_07882	-	hypothetical protein	13	15	20	68	53	58	0.00261342	1.38896	0.00100642	10.8157	2.61889	2.58279
CNAG_02552	-	transketolase, variant 2	1177	1283	1396	4769	4843	4708	3.63e-30	1.38625	8.04e-32	137.805	2.61398	29.4399
CNAG_13192	-	unspecified product	20	7	25	78	51	64	0.0100264	1.38105	0.00444178	8.09376	2.60458	1.99886
CNAG_00336	-	hypothetical protein	549	452	731	2169	1817	2443	3.24e-14	1.37594	2.29e-15	62.7961	2.59537	13.4891
CNAG_07946	-	hypothetical protein	17	18	14	65	53	63	0.00200417	1.3729	0.000752334	11.3553	2.58991	2.69807
CNAG_12175	-	unspecified product	27	15	29	91	63	110	0.00119001	1.3726	0.000422569	12.4297	2.58936	2.92445
CNAG_12752	-	unspecified product	19	12	11	50	56	48	0.00664073	1.37199	0.00280392	8.93086	2.58828	2.17778
CNAG_05147	-	hypothetical protein	235	167	276	935	747	813	2.94e-11	1.37122	2.97e-12	48.7056	2.58689	10.5323
CNAG_12298	-	unspecified product	33	24	34	127	112	94	0.000136266	1.36978	3.95914e-05	16.8909	2.5843	3.86561
CNAG_12862	-	unspecified product	13	22	13	77	29	73	0.0148529	1.36919	0.00688131	7.30369	2.58325	1.82819
CNAG_07784	-	hypothetical protein	29	22	47	108	112	141	0.000236264	1.36635	7.22475e-05	15.7511	2.57818	3.6266
CNAG_05993	-	transmembrane transporter Liz1p, variant	545	583	409	1861	1676	2126	3.19e-18	1.36628	1.46e-19	81.8658	2.57805	17.4958
CNAG_05501	-	hypothetical protein, variant	102	75	120	395	300	396	5.32e-09	1.36262	7.36e-10	37.9233	2.57151	8.27413
CNAG_02124	-	hypothetical protein	801	930	875	3261	2875	3428	7.61e-34	1.36259	1.36e-35	155.062	2.57146	33.1184
CNAG_12992	-	unspecified product	16	8	10	49	36	39	0.01706	1.35917	0.00802134	7.0287	2.56537	1.76802
CNAG_00738	-	hypothetical protein	77	54	126	359	261	319	1.33343e-05	1.35747	3.20857e-06	21.6876	2.56235	4.87503
CNAG_12481	-	unspecified product	54	41	40	196	164	129	2.92803e-05	1.35724	7.49199e-06	20.0633	2.56194	4.53342
CNAG_05924	-	hypothetical protein	16	39	46	113	112	145	0.000948749	1.35533	0.000328382	12.9011	2.55855	3.02285
CNAG_12815	-	unspecified product	14	10	15	42	38	63	0.00978633	1.35198	0.00432582	8.14172	2.55262	2.00938
CNAG_06629	-	hypothetical protein	34	17	26	105	86	88	0.000662268	1.35104	0.000221652	13.638	2.55096	3.17897
CNAG_02463	-	hypothetical protein	291	255	307	984	982	1131	2.13e-22	1.34845	7.57e-24	101.386	2.54639	21.6716
CNAG_05914	-	MFS transporter, SP family, general alpha glucoside:H symporter	252	280	273	932	968	1016	2.71e-22	1.34745	9.71e-24	100.892	2.54462	21.5663
CNAG_12976	-	unspecified product	17	6	30	54	51	89	0.0231023	1.34725	0.011314	6.41532	2.54426	1.63634
CNAG_13203	-	unspecified product	35	35	70	164	167	176	7.76406e-05	1.34715	2.1508e-05	18.0509	2.54409	4.10991
CNAG_00546	CHS4	Chitin synthase	1660	1636	1765	6520	5807	5930	1.05e-33	1.34344	1.92e-35	154.373	2.53755	32.9797
CNAG_05444	-	NADPH dehydrogenase	1113	917	1187	4009	3784	3778	1.59e-23	1.34028	5.16e-25	106.707	2.532	22.7987
CNAG_13165	-	unspecified product	23	8	10	29	55	64	0.0314213	1.33979	0.0160101	5.80177	2.53115	1.50278
CNAG_01401	-	hypothetical protein	29	11	26	64	80	94	0.00378278	1.33863	0.00150884	10.0678	2.52912	2.42219
CNAG_06309	-	hypothetical protein	26	41	27	90	111	139	0.000252267	1.33796	7.73893e-05	15.621	2.52793	3.59814
CNAG_12642	-	unspecified product	36	37	26	126	97	135	5.73143e-05	1.33783	1.54403e-05	18.6824	2.52771	4.24174
CNAG_12540	-	unspecified product	20	17	10	52	57	60	0.00565843	1.33713	0.00233768	9.26348	2.52647	2.2473
CNAG_04711	-	hypothetical protein	7	10	20	50	25	60	0.0354671	1.33641	0.018403	5.55738	2.52522	1.45017
CNAG_04025	-	transaldolase	59	66	49	248	198	177	2.70994e-06	1.33612	5.81e-07	24.9739	2.52472	5.56704
CNAG_04333	-	hypothetical protein	83	88	115	346	336	345	5.79e-10	1.33582	6.95e-11	42.534	2.52418	9.237
CNAG_01993	-	hypothetical protein	1110	728	939	3354	3221	3387	2.75e-17	1.33545	1.38e-18	77.421	2.52353	16.5612
CNAG_07781	-	ATP-dependent bile acid transporter	878	870	1096	3318	3184	3701	1.26e-25	1.3307	3.52e-27	116.594	2.51525	24.9008
CNAG_12080	-	unspecified product	51	43	65	219	159	192	3.00352e-06	1.33015	6.47e-07	24.7679	2.5143	5.52237
CNAG_12019	-	unspecified product	31	22	32	121	70	115	0.000564063	1.32897	0.000186148	13.966	2.51223	3.24867
CNAG_03443	-	hypothetical protein	14	8	8	49	28	30	0.0359347	1.32815	0.0186892	5.53037	2.51081	1.44449
CNAG_07798	-	amidohydrolase 3	127	68	84	355	302	338	3.1e-07	1.32566	5.65e-08	29.48	2.50647	6.50858
CNAG_00498	CDC14	cell division cycle protein 14	1200	1171	1104	4128	4246	3977	8.25e-29	1.3245	1.95e-30	131.476	2.50447	28.0834
CNAG_03067	-	hydroxymethylglutaryl-CoA lyase	511	582	472	1740	1778	2075	6.09e-24	1.3244	1.96e-25	108.625	2.50429	23.2155
CNAG_07540	-	hypothetical protein	1890	1305	1738	6199	5367	6007	5.29e-19	1.32349	2.33e-20	85.4917	2.50271	18.2769
CNAG_01034	-	hypothetical protein	51	37	65	181	136	233	3.04099e-05	1.32299	7.79596e-06	19.9873	2.50184	4.51699
CNAG_00015	-	hypothetical protein	265	166	235	780	710	883	3.78e-12	1.32007	3.3e-13	53.0233	2.49678	11.4224
CNAG_04727	-	hypothetical protein	34	131	63	298	263	249	0.00158361	1.31988	0.00058161	11.8339	2.49646	2.80035
CNAG_00699	LPI15	transmembrane receptor	714	676	767	2784	2142	2760	5.99e-25	1.31873	1.78e-26	113.386	2.49447	24.2223
CNAG_03642	-	hypothetical protein	52	61	84	206	201	298	2.47963e-06	1.31849	5.28e-07	25.1585	2.49405	5.60561
CNAG_00123	-	hypothetical protein	141	151	150	463	478	636	3.5e-13	1.31778	2.75e-14	57.9051	2.49283	12.4558
CNAG_03546	-	hypothetical protein	99	76	91	344	289	309	1.48e-09	1.31579	1.88e-10	40.592	2.48938	8.82942
CNAG_07868	-	hypothetical protein	420	352	465	1483	1360	1544	7.13e-21	1.31556	2.73e-22	94.2878	2.48899	20.1466
CNAG_05539	-	hypothetical protein	811	1281	997	3442	3452	4087	1.37e-14	1.31515	9.24e-16	64.5858	2.48828	13.8643
CNAG_12357	-	unspecified product	20	11	20	58	40	85	0.00950381	1.31501	0.0041799	8.20396	2.48804	2.0221
CNAG_01695	-	hypothetical protein	180	194	211	630	645	804	3.81e-16	1.31431	2.24e-17	71.9235	2.48684	15.4195
CNAG_01939	-	hypothetical protein	103	99	91	380	336	314	9.71e-10	1.3085	1.19e-10	41.4759	2.47685	9.01299
CNAG_04106	-	hypothetical protein	295	756	218	1387	1684	1379	0.0414014	1.30587	0.0219759	5.24769	2.47232	1.38299
CNAG_12994	-	unspecified product	62	34	52	139	137	251	0.000206416	1.30538	6.22275e-05	16.0336	2.47149	3.68526
CNAG_12197	-	unspecified product	43	38	68	194	142	190	3.42201e-05	1.30463	8.85289e-06	19.7442	2.4702	4.46572
CNAG_05293	-	glycogenin glucosyltransferase	1903	1482	1348	6329	5306	4929	1.72e-14	1.30391	1.18e-15	64.1069	2.46897	13.7635
CNAG_12568	-	unspecified product	130	42	129	335	325	399	0.000299578	1.30322	9.33765e-05	15.2661	2.46779	3.52349
CNAG_00531	ENA1	potassium/sodium efflux P-type ATPase, fungal- type	3358	4474	2914	12776	12572	12350	4.01e-15	1.30319	2.56e-16	67.1187	2.46775	14.3964
CNAG_06000	CMP1	glycoprotein	15258	9815	11714	49393	37988	41653	2.72e-14	1.30277	1.9e-15	63.1657	2.46702	13.566
CNAG_12442	-	unspecified product	7	7	9	29	23	29	0.0498247	1.30256	0.027029	4.88896	2.46667	1.30255
CNAG_06321	-	hypothetical protein, variant	126	71	186	437	483	413	3.47347e-05	1.29806	9.01573e-06	19.7094	2.45899	4.45924
CNAG_02497	-	thaumatin family protein, variant	77	45	62	218	225	197	4.78201e-06	1.29604	1.06718e-06	23.803	2.45553	5.32039
CNAG_12307	-	unspecified product	25	22	33	88	83	109	0.000428202	1.29164	0.000137522	14.5358	2.44805	3.36835
CNAG_00905	-	MFS transporter	61	66	96	299	213	267	1.45691e-06	1.2912	2.95e-07	26.2796	2.44731	5.83657
CNAG_03677	-	hypothetical protein	4393	4281	4257	16546	13231	15304	3.56e-34	1.29054	6.31e-36	156.584	2.44619	33.448
CNAG_02799	DAK202a	dihydroxyacetone kinase	1548	1484	1479	4883	5029	5810	6.34e-40	1.28902	8.96e-42	183.358	2.44362	39.1981
CNAG_02150	-	mRNA methyltransferase	242	323	299	951	942	1116	2.63e-16	1.28635	1.5e-17	72.7132	2.43909	15.5804
CNAG_04879	-	Glycogen debranching enzyme	3500	4242	2873	12068	12658	12017	3.71e-16	1.28521	2.17e-17	71.9838	2.43718	15.431
CNAG_04105	-	hypothetical protein	1991	2590	1003	8899	5978	4329	0.0184178	1.28441	0.00872769	6.87772	2.43583	1.73476
CNAG_04688	-	acyl-CoA dehydrogenase	358	261	382	996	1130	1353	1.32e-12	1.28397	1.09e-13	55.201	2.43509	11.8798
CNAG_06499	DPP101	hypothetical protein	1191	1150	1144	4357	3672	4044	8.08e-32	1.2828	1.64e-33	145.537	2.43311	31.0927
CNAG_12946	-	unspecified product	74	33	48	188	150	200	0.000113054	1.28165	3.23191e-05	17.2763	2.43116	3.94671
CNAG_05458	-	endo-1,3(4)-beta-glucanase	193	191	167	850	535	512	1.22e-07	1.27904	2.09e-08	31.4105	2.42678	6.9123
CNAG_07335	-	cystinosin	879	475	1018	2952	2207	3060	1.13e-07	1.27741	1.91e-08	31.5814	2.42404	6.94801
CNAG_07480	-	cytochrome b5 reductase	11	7	20	45	40	46	0.0270254	1.27451	0.0134944	6.10311	2.41917	1.56823
CNAG_02828	-	hypothetical protein	69	51	91	253	226	246	2.05853e-06	1.27145	4.31e-07	25.549	2.41404	5.68644
CNAG_05639	PPS1	hypothetical protein	821	955	917	3190	2978	3081	1.16e-26	1.27142	3.13e-28	121.395	2.41398	25.9345
CNAG_01056	-	hypothetical protein	22	28	31	104	75	100	0.000598091	1.26887	0.000198555	13.8447	2.40973	3.22323
CNAG_12621	-	unspecified product	90	46	88	258	250	259	8.94289e-06	1.26869	2.07601e-06	22.5234	2.40943	5.04852
CNAG_00507	-	nitrilase	27	21	22	85	70	85	0.00093841	1.26534	0.000324457	12.9236	2.40383	3.02761
CNAG_02479	-	Monosaccharide transporter	363	241	340	1174	975	1074	3.05e-12	1.26284	2.63e-13	53.4678	2.39968	11.5164
CNAG_12710	-	unspecified product	23	30	35	106	88	107	0.000356583	1.26073	0.00011246	14.9151	2.39616	3.44784
CNAG_04737	-	hypothetical protein	2547	4547	2093	10731	10130	10430	0.00179017	1.25798	0.000664077	11.5872	2.3916	2.74711
CNAG_04861	-	transglycosylase SLT domain-containing protein	4554	3508	3706	15357	12355	12229	8.08e-17	1.2578	4.29e-18	75.1822	2.39131	16.0926
CNAG_01207	-	hypothetical protein	612	513	535	2022	1687	1945	1.3e-22	1.25728	4.54e-24	102.4	2.39045	21.8864
CNAG_04759	-	hypothetical protein	43	23	74	165	133	180	0.00190798	1.2562	0.000712239	11.457	2.38866	2.71943
CNAG_02342	-	hypothetical protein	645	514	560	2055	1812	1975	1.24e-21	1.25584	4.59e-23	97.818	2.38806	20.9068
CNAG_13084	-	unspecified product	44	26	59	155	122	163	0.000350241	1.2554	0.000110374	14.9504	2.38734	3.45563
CNAG_01996	-	hypothetical protein, variant	872	983	904	3107	2996	3273	1.51e-31	1.2543	3.11e-33	144.266	2.38552	30.8199
CNAG_07809	-	hypothetical protein	18	13	32	83	60	71	0.00800189	1.25316	0.00345932	8.54784	2.38364	2.09681
CNAG_03560	-	hypothetical protein	219	221	260	806	774	791	4.02e-16	1.25192	2.37e-17	71.8124	2.38158	15.396
CNAG_02865	-	hypothetical protein, variant	25	44	37	105	113	143	0.000310156	1.2512	9.69022e-05	15.1961	2.3804	3.50842
CNAG_07971	-	hypothetical protein	12	11	14	47	32	47	0.0196948	1.25071	0.00942177	6.74108	2.37959	1.70565
CNAG_03413	-	alginate lyase	1069	913	1024	3652	3217	3293	4.32e-24	1.25012	1.39e-25	109.31	2.37861	23.3641
CNAG_00492	-	hypothetical protein	32	21	46	106	102	128	0.000844283	1.24896	0.000289006	13.1403	2.3767	3.07351
CNAG_12649	-	unspecified product	19	12	13	35	54	60	0.0172934	1.24832	0.00814382	7.00157	2.37565	1.76212
CNAG_06381	-	hypothetical protein	17237	15498	13636	50649	55841	49479	5.8e-20	1.24718	2.4e-21	89.9888	2.37376	19.2368
CNAG_06578	-	hypothetical protein	8875	16186	5984	33833	34619	36574	0.00972432	1.24686	0.00429242	8.15578	2.37325	2.01214
CNAG_04945	-	hypothetical protein	225	156	228	720	617	721	2.19e-11	1.24573	2.15e-12	49.3462	2.37138	10.6602
CNAG_00049	-	hypothetical protein	173	151	193	607	544	593	2.38e-13	1.24455	1.83e-14	58.7044	2.36944	12.6226
CNAG_01930	-	endopeptidase	1671	1762	1628	5872	5277	5869	1.14e-36	1.23895	1.89e-38	168.138	2.36026	35.9443
CNAG_06017	-	hypothetical protein	41	20	49	129	128	110	0.00152231	1.2367	0.000557601	11.9124	2.35659	2.8175
CNAG_00587	-	hypothetical protein	97	80	107	358	265	330	3.77e-08	1.23388	5.98e-09	33.8398	2.35198	7.42367
CNAG_07417	-	hypothetical protein	196	110	169	559	543	478	2.46e-07	1.23223	4.41e-08	29.9588	2.3493	6.60905
CNAG_05212	-	hypothetical protein	55	36	45	122	129	208	0.000202716	1.23207	6.10417e-05	16.0701	2.34904	3.69311
CNAG_04317	-	hypothetical protein	54	92	59	259	218	207	2.545e-05	1.23148	6.43995e-06	20.3528	2.34808	4.59431
CNAG_12293	-	unspecified product	50	39	58	175	108	214	0.000221911	1.2314	6.73946e-05	15.8826	2.34794	3.65382
CNAG_12991	-	unspecified product	20	35	33	89	92	114	0.000973266	1.22939	0.000337384	12.8505	2.34468	3.01177
CNAG_02182	GRE2	D-lactaldehyde dehydrogenase	6811	7757	5788	25996	24252	17029	5.48e-10	1.22845	6.55e-11	42.6483	2.34314	9.26148
CNAG_12647	-	unspecified product	75	81	83	297	215	288	9.42e-08	1.22765	1.58e-08	31.9488	2.34185	7.02606
CNAG_01605	-	rossman fold oxidoreductase	99	78	87	323	247	312	2.87e-08	1.22711	4.48e-09	34.4034	2.34097	7.54167
CNAG_06869	-	HPP family protein, variant 2	44	31	40	106	127	151	0.000145347	1.22636	4.25513e-05	16.754	2.33976	3.8376
CNAG_12229	-	unspecified product	14	8	20	38	38	65	0.0314244	1.22294	0.0160155	5.80117	2.33423	1.50273
CNAG_02159	-	hypothetical protein	594	447	698	1873	1936	1956	1.1e-12	1.22209	8.99e-14	55.5766	2.33285	11.9602
CNAG_02043	-	hypothetical protein, variant	233	183	169	705	598	638	2.33e-11	1.22205	2.32e-12	49.1958	2.33278	10.6323
CNAG_05324	-	Sugar transporter	14	23	30	90	60	73	0.00668454	1.22194	0.00282488	8.91726	2.3326	2.17493
CNAG_03744	-	hypothetical protein	11	9	17	44	28	52	0.0341765	1.22102	0.0176408	5.63147	2.33111	1.46627
CNAG_07787	-	hypothetical protein	23	12	20	57	61	64	0.00789465	1.21823	0.0034081	8.575	2.32662	2.10267
CNAG_01262	GPB1	guanine nucleotide-binding protein subunit beta	1014	734	872	3110	2406	3192	5.34e-16	1.21811	3.18e-17	71.2307	2.32642	15.2724
CNAG_03021	-	hypothetical protein	38	17	56	125	124	117	0.00452602	1.21702	0.00183256	9.71012	2.32466	2.34428
CNAG_06453	-	benzodiazapine receptor	4088	4568	3229	18166	11806	9047	0.00152607	1.2164	0.000559164	11.9072	2.32366	2.81643
CNAG_13056	-	unspecified product	14	6	17	49	29	45	0.0446191	1.21633	0.0238978	5.10204	2.32355	1.35048
CNAG_05244	-	hypothetical protein	23	16	35	97	52	98	0.00870573	1.21608	0.00379464	8.37956	2.32315	2.06019
CNAG_07659	-	hypothetical protein	3523	4009	3029	12413	11070	11391	2.55e-19	1.21523	1.1e-20	86.972	2.32177	18.5934
CNAG_12733	-	unspecified product	73	32	60	193	166	186	0.00021779	1.21512	6.60359e-05	15.9212	2.3216	3.66196
CNAG_03019	-	long-chain acyl-CoA synthetase	2417	2408	2413	8474	7940	7407	1.4e-24	1.21389	4.27e-26	111.649	2.31963	23.8524
CNAG_12884	-	unspecified product	26	22	34	103	57	113	0.00374842	1.21035	0.00149374	10.0863	2.31394	2.42615
CNAG_13017	-	unspecified product	18	14	34	80	45	95	0.0170569	1.20968	0.00801778	7.0295	2.31287	1.7681
CNAG_05201	MSH4	DNA mismatch repair protein Msh4	162	149	163	450	554	548	5.51e-11	1.20357	5.8e-12	47.3947	2.30309	10.2585
CNAG_04015	-	amino acid transporter	28	35	49	141	124	100	0.00102594	1.20271	0.000358759	12.7356	2.30171	2.98888
CNAG_02478	-	Glycerol dehydrogenase	724	538	587	1991	1990	2069	2.21e-17	1.20251	1.1e-18	77.8763	2.3014	16.6559
CNAG_04556	-	translocation protein Sec62	54	86	75	224	210	273	3.42996e-06	1.20053	7.46e-07	24.4935	2.29825	5.46471
CNAG_02429	-	hypothetical protein	65	41	79	202	176	229	4.39862e-05	1.19967	1.15847e-05	19.2305	2.29687	4.35668
CNAG_02968	PLC2	Phosphatidylinositol-specific phospholipase C, putative	292	312	237	853	889	1012	2.91e-14	1.19929	2.04e-15	63.0261	2.29627	13.5368
CNAG_04195	-	O-methyltransferase	1014	822	965	2946	2897	3317	1.79e-24	1.19817	5.49e-26	111.148	2.29448	23.748
CNAG_02958	CFO2	ferroxidase	1058	705	1871	3464	3451	5043	0.0136552	1.19813	0.00626598	7.47218	2.29443	1.8647
CNAG_12902	-	unspecified product	16	8	19	45	33	64	0.0334029	1.19782	0.0172046	5.67538	2.29393	1.47622
CNAG_04409	-	hypothetical protein	649	1546	749	2509	3153	4016	0.0188821	1.1968	0.00897554	6.82769	2.2923	1.72395
CNAG_06139	-	hypothetical protein	220	184	303	701	675	943	1.56e-08	1.19533	2.34e-09	35.6675	2.28998	7.80575
CNAG_02757	-	hypothetical protein	496	624	559	1663	1640	2203	5.19e-16	1.19517	3.08e-17	71.2906	2.28971	15.2847
CNAG_07479	-	hypothetical protein	585	503	427	1672	1555	1709	1.58e-16	1.19433	8.78e-18	73.7704	2.28838	15.8006
CNAG_03857	-	hypothetical protein	8243	6958	7618	26040	22812	25461	1.28e-30	1.19351	2.76e-32	139.925	2.28708	29.8912
CNAG_02797	CPL1/CPL	putative secreted protein	1754	1232	1381	5162	4653	4337	1.72e-13	1.19294	1.3e-14	59.3784	2.28619	12.7637
CNAG_04043	-	hypothetical protein	358	300	290	1067	951	1069	7.27e-17	1.19294	3.85e-18	75.3967	2.28618	16.1387
CNAG_01519	EEP1	endonuclease/exonuclease/phosphatase	437	455	349	1277	1282	1486	2.18e-16	1.19219	1.23e-17	73.1031	2.28499	15.6624
CNAG_12116	-	unspecified product	9	13	14	32	27	60	0.0481736	1.19166	0.0260207	4.95464	2.28415	1.31719
CNAG_05872	-	endopeptidase	1319	2485	1265	5815	5010	5696	4.27e-07	1.19125	8e-08	28.8063	2.28351	6.36927
CNAG_05192	-	hypothetical protein	104	98	95	340	270	358	5.12e-09	1.18933	7.06e-10	38.0034	2.28047	8.29041
CNAG_03688	-	hypothetical protein	1901	1848	1318	6012	4913	5526	9.71e-14	1.18875	7.23e-15	60.5358	2.27955	13.0126
CNAG_03480	-	NAD epimerase domain-containing protein	824	646	753	2398	2463	2329	1.34e-17	1.18873	6.46e-19	78.9215	2.27953	16.8737
CNAG_01635	-	hypothetical protein	596	591	480	1682	1828	1887	1.43e-17	1.1863	6.91e-19	78.7888	2.27568	16.8457
CNAG_01936	-	Sugar transporter	56	22	54	153	119	156	0.00188455	1.18399	0.000702334	11.4831	2.27204	2.72479
CNAG_12663	-	unspecified product	47	37	46	141	126	154	4.25481e-05	1.18239	1.11798e-05	19.2984	2.26952	4.37112
CNAG_13199	-	unspecified product	20	21	8	47	47	65	0.0261197	1.18013	0.0129972	6.16949	2.26597	1.58303
CNAG_04602	-	hypothetical protein	311	401	327	1166	962	1236	3.14e-14	1.1794	2.21e-15	62.8649	2.26482	13.5035
CNAG_03265	-	hypothetical protein	1309	1376	1292	4455	4063	4294	1.09e-29	1.17878	2.47e-31	135.577	2.26385	28.9621
CNAG_06816	-	hypothetical protein	130	93	118	351	356	392	6.42e-09	1.17841	8.97e-10	37.5372	2.26327	8.19278
CNAG_02735	-	hypothetical protein	65	38	69	189	181	183	7.4465e-05	1.17815	2.0555e-05	18.1372	2.26286	4.12805
CNAG_03058	-	hypothetical protein	4656	7401	2780	17347	16091	14152	0.0115239	1.17703	0.00518171	7.8149	2.26111	1.9384
CNAG_03076	-	hypothetical protein	85	93	112	329	255	354	1.14e-07	1.17655	1.94e-08	31.5488	2.26036	6.94166
CNAG_07862	-	fumarate reductase	1130	1077	1050	3617	3309	3543	5.76e-30	1.17538	1.28e-31	136.878	2.25853	29.2394
CNAG_12662	-	unspecified product	14	10	13	36	35	48	0.0314472	1.16872	0.0160379	5.79871	2.24812	1.50242
CNAG_02446	-	response regulator receiver protein	332	290	359	1110	993	1033	2.59e-15	1.16858	1.62e-16	68.0191	2.2479	14.5873
CNAG_04077	-	hypothetical protein	136	84	145	391	360	417	5.97e-07	1.16723	1.14e-07	28.1243	2.2458	6.22433
CNAG_12290	-	unspecified product	25	8	30	60	54	89	0.030409	1.16641	0.0154195	5.86789	2.24452	1.517
CNAG_12541	-	unspecified product	15	14	31	72	31	92	0.041956	1.16486	0.0222806	5.22374	2.24211	1.37721
CNAG_12122	-	unspecified product	30	23	40	91	101	104	0.00145275	1.16176	0.00052819	12.0134	2.2373	2.83781
CNAG_02407	-	Phospholipase D	1842	2148	1536	5574	6115	5845	1.36e-14	1.15946	9.2e-16	64.5958	2.23373	13.8658
CNAG_07306	-	hypothetical protein	29	23	71	138	134	117	0.0101463	1.1582	0.00450616	8.06769	2.23179	1.99369
CNAG_02087	-	Acyl-CoA-dependent ceramide synthase	69	58	79	173	193	294	4.48357e-05	1.15791	1.1825e-05	19.1913	2.23134	4.34838
CNAG_03082	-	cupin domain-containing protein	16	17	16	57	47	51	0.0136088	1.15167	0.00623656	7.48065	2.22172	1.86618
CNAG_03464	LAC2	Laccase 2	128	118	96	366	392	317	5.05e-07	1.15138	9.53e-08	28.4678	2.22127	6.29661
CNAG_02718	-	NAD binding dehydrogenase	961	870	945	3361	2711	2683	6.42e-16	1.15117	3.84e-17	70.8562	2.22093	15.1927
CNAG_05873	-	hypothetical protein	55	79	48	255	154	166	0.000573883	1.15068	0.000189742	13.93	2.22019	3.24118
CNAG_04735	MEP1	extracellular elastinolytic metalloproteinase	1503	1761	1262	5041	4068	5240	7e-15	1.14916	4.58e-16	65.9712	2.21784	14.1552
CNAG_04085	-	oxidoreductase, variant	103	134	116	387	352	372	1.01e-08	1.14443	1.45e-09	36.6023	2.21059	7.99773
CNAG_05119	-	GABA permease	109	204	79	387	380	472	0.000358229	1.14344	0.000113067	14.9049	2.20907	3.44584
CNAG_12739	-	unspecified product	38	20	38	87	90	126	0.00319419	1.14083	0.001256	10.4061	2.20508	2.49564
CNAG_02744	-	hypothetical protein	936	749	1183	3008	2561	3477	4e-11	1.14065	4.13e-12	48.0611	2.20481	10.3985
CNAG_06999	-	hypothetical protein	207	234	199	568	684	758	7.09e-11	1.13918	7.56e-12	46.8761	2.20255	10.1491
CNAG_06243	-	hypothetical protein	84	133	126	365	286	433	3.15342e-06	1.13899	6.81e-07	24.6675	2.20226	5.50122
CNAG_01989	-	hypothetical protein	70	85	65	245	190	258	3.24063e-06	1.13893	7.02e-07	24.6094	2.20217	5.48937
CNAG_05410	-	hypothetical protein	276	547	310	1103	1018	1461	6.14205e-06	1.13868	1.39259e-06	23.2909	2.2018	5.21169
CNAG_03181	-	hypothetical protein, variant	36	18	28	85	71	102	0.00477899	1.13704	0.00194615	9.59965	2.1993	2.32066
CNAG_01076	-	4-aminobutyrate aminotransferase	96	103	92	310	268	336	1.78e-08	1.13697	2.7e-09	35.3901	2.19918	7.74923
CNAG_00419	-	DNA polymerase beta subunit	24	24	54	108	80	134	0.00849212	1.13562	0.00369318	8.42883	2.19714	2.07098
CNAG_12218	-	unspecified product	22	16	25	65	33	103	0.0321868	1.13537	0.0165063	5.74812	2.19675	1.49232
CNAG_07476	-	hypothetical protein	165	199	188	534	549	644	1.02e-11	1.13223	9.54e-13	50.9361	2.19197	10.9926
CNAG_02524	-	hypothetical protein	468	716	377	1562	1576	1738	2.41e-07	1.13112	4.31e-08	30.0033	2.19029	6.61842
CNAG_06523	-	hypothetical protein	145	128	145	483	318	512	1.35e-07	1.13106	2.32e-08	31.2066	2.19019	6.86887
CNAG_06658	-	rhomboid family membrane protein	1106	1130	1077	3805	3029	3505	5.14e-22	1.13059	1.87e-23	99.5943	2.18949	21.2891
CNAG_01969	-	zinc metalloprotease	210	199	240	666	682	665	4.69e-12	1.12633	4.15e-13	52.5699	2.18303	11.3288
CNAG_00080	-	hypothetical protein	22	24	31	87	59	95	0.00501722	1.12575	0.00204933	9.50482	2.18215	2.29954
CNAG_06135	-	hypothetical protein	113	121	133	421	324	397	1.18e-08	1.12471	1.72e-09	36.2653	2.18058	7.92743
CNAG_01745	GPD2	glycerol-3-phosphate dehydrogenase (NAD())	6461	9663	5027	23393	20664	21446	1.05e-07	1.12137	1.77e-08	31.7292	2.17554	6.98012
CNAG_12079	-	unspecified product	29	17	27	61	57	111	0.013842	1.12125	0.00635576	7.44657	2.17536	1.8588
CNAG_02319	-	hypothetical protein	1187	1173	1300	4255	3513	3539	3.8e-17	1.12045	1.94e-18	76.7468	2.17415	16.4203
CNAG_01645	-	hypothetical protein	79	52	55	190	181	204	3.08715e-05	1.11809	7.92948e-06	19.9548	2.17059	4.51044
CNAG_07981	-	hypothetical protein	56	17	14	97	71	101	0.0439567	1.11503	0.0234728	5.13318	2.16599	1.35698
CNAG_12091	-	unspecified product	23	20	29	85	57	81	0.00667403	1.11492	0.00281962	8.92066	2.16582	2.17561
CNAG_05220	TLK1	phosphatidylinositol 3-kinase	80	122	133	335	320	381	2.31056e-06	1.11473	4.9e-07	25.3036	2.16555	5.63628
CNAG_07912	-	hypothetical protein	32	26	13	61	90	66	0.0212438	1.11394	0.0102451	6.59178	2.16436	1.67277
CNAG_12909	-	unspecified product	489	384	445	1379	1223	1465	2.12e-16	1.1134	1.2e-17	73.1596	2.16355	15.6739
CNAG_02994	-	hypothetical protein, variant	21699	20174	17204	62202	61538	57581	8.11e-18	1.11335	3.83e-19	79.9549	2.16347	17.0908
CNAG_04631	RIK1	ribitol kinase	740	654	602	2288	1896	1945	1.66e-14	1.11146	1.13e-15	64.1881	2.16064	13.7793
CNAG_05258	SMG1	glucose-methanol-choline oxidoreductase	17	15	13	45	48	45	0.0252345	1.11072	0.0125102	6.23709	2.15953	1.598
CNAG_07486	-	hypothetical protein	232	248	347	891	798	852	3.27e-09	1.11005	4.37e-10	38.9381	2.15853	8.48503
CNAG_12734	-	unspecified product	52	49	71	187	150	193	6.34493e-05	1.10916	1.72583e-05	18.4702	2.15721	4.19757
CNAG_05394	-	cation:cation antiporter	944	861	1010	2997	2701	2935	3.88e-22	1.10726	1.4e-23	100.163	2.15436	21.4109
CNAG_05503	-	LIM domain-containing protein	560	537	484	1575	1506	1778	1.47e-20	1.10721	5.74e-22	92.8163	2.15428	19.832
CNAG_12967	-	unspecified product	74	64	65	247	181	194	2.30155e-05	1.10711	5.77015e-06	20.563	2.15414	4.63798
CNAG_00662	-	carboxymethylenebutenolidase	2441	2085	2503	6977	6988	7587	2.69e-24	1.10684	8.46e-26	110.292	2.15374	23.5709
CNAG_07621	-	hypothetical protein	132	125	128	445	303	436	9.28e-08	1.10379	1.56e-08	31.9825	2.14919	7.03265
CNAG_07823	-	solute carrier family 35 (UDP-galactose transporter), member B1	23	26	45	65	107	116	0.0111706	1.10316	0.00500363	7.87813	2.14825	1.95192
CNAG_01913	-	hypothetical protein	199	237	220	687	614	707	9.43e-13	1.10193	7.66e-14	55.8899	2.14642	12.0255
CNAG_13038	-	unspecified product	23	16	24	58	52	84	0.0130769	1.10114	0.0059572	7.5632	2.14524	1.8835
CNAG_06169	-	hypothetical protein	475	655	418	1742	1546	1419	2.87e-08	1.09921	4.48e-09	34.4027	2.14238	7.54167
CNAG_06137	-	hypothetical protein	33	19	25	67	84	83	0.00717579	1.09677	0.00305807	8.77249	2.13876	2.14413
CNAG_05778	-	WSC domain-containing protein, variant	398	428	553	1403	1244	1567	4.14e-12	1.09668	3.62e-13	52.8392	2.13861	11.3826
CNAG_12761	-	unspecified product	51	41	68	166	124	201	0.000468398	1.09658	0.000151813	14.3496	2.13847	3.32938
CNAG_04320	CPS1	polysaccharide synthase Cps1p	5942	5060	5378	17414	16490	15754	2.74e-20	1.09519	1.11e-21	91.5081	2.13641	19.5624
CNAG_06814	SXI1alpha	Alpha cell-type homeodomain transcription factor	453	291	448	1149	1173	1303	2.47e-09	1.09485	3.24e-10	39.522	2.13591	8.60736
CNAG_06819	-	DNA helicase INO80	3993	3817	3812	11655	11215	12441	1.46e-38	1.09276	2.18e-40	177.006	2.13282	37.8369
CNAG_02834	-	sterol 3-beta-glucosyltransferase	585	1045	686	2140	2258	2661	1.53e-07	1.09267	2.64e-08	30.9561	2.13268	6.81532
CNAG_13111	-	unspecified product	47	33	66	145	107	196	0.00239275	1.09251	0.000912321	10.9976	2.13245	2.6211
CNAG_12312	-	unspecified product	19	12	19	60	41	51	0.0272568	1.09238	0.0136401	6.08413	2.13226	1.56452
CNAG_04787	-	membrane protein	231	199	232	628	623	760	1.96e-12	1.08941	1.66e-13	54.3703	2.12786	11.7071
CNAG_00332	SIP4	hypothetical protein	789	782	835	2469	2318	2499	9.75e-25	1.08886	2.91e-26	112.405	2.12705	24.0111
CNAG_04907	-	hypothetical protein, variant	71	66	82	232	155	283	8.9277e-05	1.08882	2.4984e-05	17.7658	2.127	4.04926
CNAG_05460	-	2-dehydropantoate 2-reductase	1038	894	1005	3134	2698	3067	1.31e-21	1.08873	4.85e-23	97.7067	2.12686	20.8838
CNAG_03083	-	cupin domain-containing protein	148	93	125	408	336	363	1.69445e-06	1.08866	3.48e-07	25.9635	2.12676	5.77097
CNAG_05567	PPP3	serine-threonine protein phosphatase	1413	1132	1457	4037	3615	4494	1.22e-17	1.08804	5.83e-19	79.126	2.12586	16.9154
CNAG_06148	-	hypothetical protein	1903	1621	1812	5610	4823	5744	2.89e-24	1.08803	9.16e-26	110.133	2.12584	23.5394
CNAG_04689	-	hypothetical protein	665	511	624	1696	1624	2150	5.08e-14	1.08748	3.64e-15	61.8852	2.12503	13.2942
CNAG_01135	-	delta(3,5)-Delta(2,4)-dienoyl-CoA isomerase, variant 2	263	259	227	760	633	883	8.07e-12	1.08601	7.41e-13	51.4319	2.12286	11.0931
CNAG_04086	-	hypothetical protein	32	23	28	104	51	98	0.0112482	1.0858	0.0050439	7.86363	2.12256	1.94892
CNAG_06218	-	Amidase	848	797	793	2745	2251	2356	6.04e-17	1.08452	3.15e-18	75.7901	2.12067	16.2189
CNAG_12632	-	unspecified product	26	16	39	93	59	94	0.0165398	1.08384	0.00774824	7.09076	2.11967	1.78147
CNAG_03709	CSA2	hypothetical protein	250	258	400	852	788	1118	3.47e-07	1.08356	6.39e-08	29.2429	2.11926	6.45923
CNAG_01422	-	endoplasmic reticulum protein	1740	1953	1760	5273	5447	5726	2.96e-24	1.08318	9.43e-26	110.076	2.1187	23.5286
CNAG_02543	-	hypothetical protein	1157	1251	1047	3468	3175	3799	6.41e-22	1.08236	2.36e-23	99.1359	2.1175	21.193
CNAG_03876	-	Ras family protein	2581	2548	2824	8171	7914	7777	9.1e-23	1.07865	3.11e-24	103.148	2.11206	22.0409
CNAG_06396	-	hypothetical protein	109	199	62	416	421	264	0.00706509	1.0781	0.00300481	8.80454	2.11125	2.15088
CNAG_04933	-	hypothetical protein, variant 2	167	134	232	525	456	629	1.87668e-06	1.07773	3.9e-07	25.7457	2.11072	5.72661
CNAG_07596	-	hypothetical protein	48	28	37	89	98	155	0.00412084	1.07566	0.00165432	9.8983	2.10768	2.38501
CNAG_07647	-	voltage-gated chloride channel protein	2061	2614	1998	6664	6251	7145	3.48e-16	1.07553	2.03e-17	72.1189	2.1075	15.4588
CNAG_01866	-	hypothetical protein	1035	983	1290	3333	3364	3192	1.27e-13	1.07447	9.49e-15	59.9985	2.10595	12.8977
CNAG_01294	IPK1	inositol-pentakisphosphate 2-kinase, variant	1357	1296	1421	3990	3980	4241	5.53e-27	1.07435	1.44e-28	122.943	2.10577	26.257
CNAG_12795	-	unspecified product	135	144	167	428	360	560	1.44e-07	1.07429	2.48e-08	31.0791	2.10568	6.84161
CNAG_05431	RIM101	pH-response transcription factor pacC/RIM101	4044	3808	4134	12666	10996	12175	5.74e-28	1.07014	1.45e-29	127.496	2.09964	27.241
CNAG_04744	-	mannose-6-phosphate isomerase, class I	1310	1273	1156	4871	3379	2860	1.57e-07	1.07013	2.72e-08	30.8947	2.09963	6.80374
CNAG_01603	-	hypothetical protein	2777	2963	2506	8475	7198	9048	3.97e-22	1.06936	1.44e-23	100.114	2.0985	21.4017
CNAG_04457	FZC30	hypothetical protein	26	18	22	66	64	67	0.0100574	1.06928	0.00445923	8.08666	2.09839	1.99751
CNAG_05686	-	hypothetical protein	749	589	479	1990	1650	1777	2.15e-09	1.06779	2.79e-10	39.817	2.09622	8.66796
CNAG_00964	-	hypothetical protein	114	100	168	315	308	529	0.000128685	1.06643	3.71989e-05	17.0092	2.09424	3.89047
CNAG_03705	-	hypothetical protein	3810	3687	3068	11448	10517	9364	3.8e-13	1.06528	3e-14	57.7366	2.09258	12.4206
CNAG_00522	-	C2 domain-containing protein, variant	2289	3816	1614	7681	8146	7036	0.0146745	1.06232	0.00678268	7.32964	2.08828	1.83344
CNAG_02719	MAM3	hypothetical protein	182	113	182	518	455	431	6.35251e-06	1.05332	1.44343e-06	23.2219	2.0753	5.19705
CNAG_03759	HBF1	conidiation-specific protein 6	38	18	18	96	51	72	0.0326081	1.05271	0.0167391	5.72353	2.07443	1.48667
CNAG_06874	-	HpcH/HpaI aldolase/citrate lyase	968	773	869	2802	2279	2632	1.58e-15	1.05267	9.75e-17	69.0192	2.07437	14.8014
CNAG_07076	-	hypothetical protein	50	50	55	150	128	182	0.000148411	1.05154	4.34849e-05	16.7129	2.07275	3.82854
CNAG_12703	-	unspecified product	39	31	36	108	87	119	0.00149503	1.05096	0.000546135	11.9512	2.07191	2.82535
CNAG_03455	-	hypothetical protein, variant	311	207	280	819	720	815	5.06e-09	1.05078	6.97e-10	38.0288	2.07165	8.29569
CNAG_00941	-	hypothetical protein	213	185	194	559	557	631	1.45e-11	1.05	1.38e-12	50.2099	2.07053	10.8381
CNAG_01942	-	hypothetical protein	412	591	277	1240	1189	1352	1.29725e-05	1.04987	3.11193e-06	21.7463	2.07034	4.88698
CNAG_07489	-	hypothetical protein	951	808	830	2587	2310	2736	2.79e-20	1.0478	1.14e-21	91.4654	2.06738	19.5543
CNAG_13001	-	unspecified product	26	18	39	84	69	92	0.0124767	1.04647	0.00565768	7.65622	2.06547	1.9039
CNAG_00674	-	hypothetical protein	849	867	735	2223	2322	2676	1.07e-17	1.04644	5.1e-19	79.3884	2.06543	16.9697
CNAG_01680	-	3-methylcrotonyl-CoA carboxylase alpha subunit	54	73	52	193	145	190	0.000190367	1.04516	5.70421e-05	16.1984	2.0636	3.72041
CNAG_08005	-	hypothetical protein	129	74	106	260	290	360	4.68918e-05	1.04453	1.23961e-05	19.1013	2.0627	4.3289
CNAG_13145	-	unspecified product	41	28	34	94	95	114	0.00217811	1.04411	0.000821378	11.1923	2.0621	2.66192
CNAG_00097	ITR1	myo-inositol transporter, putative	267	324	310	852	869	924	1.38e-12	1.04358	1.14e-13	55.1118	2.06134	11.8607
CNAG_02944	APH1	phosphate-repressible vacuolar acid phosphatase	179	130	208	511	475	529	3.62e-07	1.04111	6.67e-08	29.1595	2.0578	6.44169
CNAG_01567	-	hypothetical protein	318	330	327	1029	821	1011	1.23e-13	1.03973	9.19e-15	60.0615	2.05585	12.9109
CNAG_12078	-	unspecified product	33	20	31	101	56	90	0.0142546	1.03846	0.00657259	7.38621	2.05403	1.84604
CNAG_01513	-	hypothetical protein	603	473	648	1757	1464	1827	5.31e-12	1.03662	4.73e-13	52.3123	2.05142	11.2749
CNAG_04036	-	hypothetical protein	200	206	240	677	555	656	3.02e-10	1.03511	3.5e-11	43.8773	2.04926	9.51974
CNAG_06119	-	spermine transporter	86	97	93	275	200	337	2.17433e-05	1.03394	5.41911e-06	20.6831	2.04761	4.66267
CNAG_06522	-	hypothetical protein	94	101	126	334	280	323	1.4788e-06	1.03388	3e-07	26.2496	2.04752	5.83009
CNAG_05667	ITR3B	myo-inositol transporter, putative	756	445	750	1937	1812	1924	1.86e-07	1.03237	3.27e-08	30.5374	2.04538	6.72957
CNAG_05331	-	hypothetical protein	45	40	46	119	121	142	0.000451517	1.03152	0.000145731	14.4266	2.04417	3.34533
CNAG_03667	-	hypothetical protein	2161	3281	1560	7329	6551	6454	9.69236e-06	1.03022	2.27263e-06	22.3496	2.04234	5.01357
CNAG_00967	-	hypothetical protein	918	823	732	2341	2365	2472	3.33e-16	1.02887	1.94e-17	72.2089	2.04042	15.4778
CNAG_12661	-	unspecified product	70	50	94	212	183	227	0.000338588	1.02613	0.000106576	15.0165	2.03655	3.47033
CNAG_07790	-	hypothetical protein	117	168	181	521	315	525	5.58858e-05	1.02402	1.50211e-05	18.7349	2.03358	4.2527
CNAG_04095	-	alpha-L-rhamnosidase	534	593	539	1666	1410	1762	8.43e-17	1.02367	4.49e-18	75.0934	2.03309	16.074
CNAG_06493	-	hypothetical protein	38	51	31	128	109	110	0.00267944	1.02364	0.00103448	10.7648	2.03304	2.57196
CNAG_00766	-	hypothetical protein	385	597	317	1286	1171	1305	4.51542e-06	1.02202	1.00324e-06	23.9219	2.03076	5.3453
CNAG_06780	-	hypothetical protein	876	719	1097	2530	2240	3048	1.24e-09	1.02117	1.55e-10	40.9617	2.02956	8.90734
CNAG_05397	-	hypothetical protein, variant	177	183	153	461	437	591	1.38e-08	1.0201	2.03e-09	35.9431	2.02806	7.86143
CNAG_03432	-	solute carrier family 2, variant	696	678	769	2196	1879	2113	2.06e-17	1.01925	1.01e-18	78.0387	2.02687	16.6851
CNAG_03997	-	hypothetical protein	141	135	162	415	455	387	5.25e-07	1.01828	9.92e-08	28.389	2.0255	6.2798
CNAG_12605	-	unspecified product	60	19	37	114	87	135	0.0212157	1.01676	0.0102257	6.59515	2.02337	1.67334
CNAG_01411	-	hypothetical protein	294	246	333	914	785	812	2.36e-09	1.01662	3.09e-10	39.6167	2.02317	8.62628
CNAG_01579	-	vacuolar membrane-associated protein IML1	2159	2311	2051	6407	6031	6327	1.94e-22	1.01601	6.83e-24	101.589	2.02232	21.7116
CNAG_07892	-	hypothetical protein	386	349	459	1209	980	1258	4.32e-11	1.01504	4.49e-12	47.8966	2.02096	10.3646
CNAG_07338	-	N-acyl-phosphatidylethanolamine-hydrolyzing phospholipase D	817	1030	775	2227	2523	2805	2.5e-11	1.01461	2.5e-12	49.0477	2.02036	10.6022
CNAG_12203	-	unspecified product	36	56	24	117	88	131	0.0103798	1.01427	0.00462007	8.02246	2.01988	1.98381
CNAG_06752	-	hypothetical protein, variant	1597	896	1652	4154	3372	4428	1.57499e-06	1.014	3.21e-07	26.1186	2.0195	5.80272
CNAG_02708	-	prenylcysteine oxidase/farnesylcysteine lyase	651	767	647	1966	1858	2123	1.49e-16	1.01392	8.2e-18	73.904	2.01939	15.8272
CNAG_13162	-	unspecified product	16	19	35	83	65	52	0.0409521	1.01322	0.0217072	5.2691	2.01841	1.38772
CNAG_01385	GGT1	Glycosylinositolphosphoceramide galactosyltransferase	3656	3514	3245	10055	9652	10181	7.34e-25	1.01217	2.18e-26	112.976	2.01694	24.1344
CNAG_04594	FZC27	hypothetical protein	490	676	518	1567	1516	1764	6.86e-11	1.01186	7.29e-12	46.9472	2.01651	10.1639
CNAG_00360	-	nuclear protein SNF4, variant	130	186	166	446	418	525	2.6e-07	1.01133	4.69e-08	29.8398	2.01577	6.58536
CNAG_00642	-	hypothetical protein	1223	1195	1435	3754	3458	3831	3.2e-18	1.00867	1.46e-19	81.8557	2.01206	17.4948
CNAG_08009	-	hypothetical protein	17	27	29	77	41	94	0.0356924	1.00772	0.0185305	5.54529	2.01073	1.44742
CNAG_05913	-	Alpha-glucosidase	711	773	849	2243	2221	2201	3.24e-15	1.00715	2.05e-16	67.556	2.00993	14.4894
CNAG_12267	-	unspecified product	14	18	17	54	35	52	0.0443132	1.00706	0.0237012	5.11636	2.00981	1.35347
CNAG_12558	-	unspecified product	55	60	29	175	87	153	0.0119975	1.00598	0.00542565	7.73181	2.00831	1.92091
CNAG_12531	-	unspecified product	70	27	61	169	112	173	0.0095588	1.00568	0.00420761	8.19197	2.00789	2.0196
CNAG_07586	-	hypothetical protein	169	181	173	538	375	593	3.29e-07	1.00525	6.04e-08	29.3502	2.0073	6.48241
CNAG_12951	-	unspecified product	86	65	71	204	168	267	0.000129877	1.00452	3.75595e-05	16.9909	2.00627	3.88647
CNAG_04714	-	MFS multidrug transporter protein	1397	1278	1510	4183	3873	3870	1.06e-16	1.00407	5.69e-18	74.6261	2.00565	15.9762
CNAG_04374	CBG2	Beta-glucuronidase	486	435	680	1547	1432	1595	1.73e-08	1.00406	2.61e-09	35.454	2.00563	7.76096
CNAG_07791	-	hypothetical protein	73	112	115	345	223	290	0.000235402	1.00118	7.1955e-05	15.7587	2.00164	3.62819
CNAG_12453	-	unspecified product	58	31	45	123	105	156	0.00343429	1.00088	0.00135758	10.2625	2.00123	2.46416
CNAG_01208	CCH1	calcium-channel protein CCH1	1450	1701	1536	4465	4342	4538	7.7e-19	1.00039	3.4e-20	84.7435	2.00054	18.1137

## Sheet: Genes dowregulated by EZT1oe
Supplementary Data 2. RNA sequencing data for transcriptome analysis of EZT1, EZT2, or CBF1 overexpression strains compared with the wild-type strain.
Locus_tag	Gene_name	Function	H99_1	H99_2	H99_3	EZT1_1	EZT1_2	EZT1_3	padj	log2FoldChange	pvalue	stat	foldChange	log10padj
CNAG_12327	-	unspecified product	5	10	4	0	0	0	0.00294993	-5.61735	0.00115306	10.5641	0.0203708	2.53019
CNAG_03454	-	hypothetical protein	2294	1682	7135	83	107	171	2.71e-10	-5.46958	3.11e-11	44.1062	0.022568	9.56682
CNAG_09011	-	NADH dehydrogenase subunit 3	2	13	18	2	0	2	0.00879549	-3.57949	0.00383701	8.35938	0.0836498	2.05574
CNAG_09010	-	NADH dehydrogenase subunit 2	6	38	136	8	2	12	0.000280548	-3.57738	8.66516e-05	15.4073	0.0837723	3.55199
CNAG_09004	-	cytochrome c oxidase subunit III	12	84	138	11	5	15	1.12308e-05	-3.45173	2.67066e-06	22.0397	0.0913957	4.94959
CNAG_09000	-	NADH dehydrogenase subunit 1	8	68	219	13	16	17	0.0178314	-3.19365	0.00842348	6.94115	0.109299	1.74882
CNAG_13156	-	unspecified product	28	29	34	6	3	6	9.52e-07	-3.11885	1.88e-07	27.1546	0.115115	6.02149
CNAG_13073	-	unspecified product	99	361	851	78	63	78	0.00106122	-3.09762	0.000373051	12.6626	0.116821	2.9742
CNAG_07767	-	hypothetical protein	16	14	23	1	5	3	0.000534275	-3.05885	0.00017553	14.0764	0.120004	3.27223
CNAG_09002	-	apocytochrome b	6	68	171	13	13	18	0.0243113	-2.99865	0.0119987	6.31106	0.125117	1.61419
CNAG_09012	-	cytochrome c oxidase subunit II	10	57	185	17	4	28	0.0410694	-2.91863	0.0217845	5.26291	0.132253	1.38648
CNAG_05161	-	hypothetical protein	265	224	322	45	58	57	1.09e-29	-2.85027	2.46e-31	135.585	0.13867	28.9621
CNAG_02984	-	sarcosine oxidase	295	282	282	48	59	82	2.44e-32	-2.70128	4.75e-34	147.999	0.153757	31.6122
CNAG_12988	-	unspecified product	1182	1110	1071	298	275	217	1.44e-49	-2.59103	1.43e-51	228.258	0.165967	48.843
CNAG_01494	-	hypothetical protein, variant	675	591	742	184	160	155	3.04e-47	-2.51553	3.55e-49	217.278	0.174884	46.5172
CNAG_02347	-	hypothetical protein	1212	1251	1070	319	238	339	9.6e-62	-2.49611	6.02e-64	285.03	0.177254	61.0177
CNAG_12993	-	unspecified product	9	79	131	16	16	24	0.0010385	-2.49137	0.000364427	12.7063	0.177837	2.98359
CNAG_09006	ND5	NADH:ubiquinone oxidoreductase subunit 5	20	76	197	26	6	45	0.0479099	-2.4863	0.0258665	4.96492	0.178463	1.31957
CNAG_09009	-	Cytochrome c oxidase subunit I	60	221	465	68	46	85	0.00772188	-2.43505	0.00332402	8.62049	0.184917	2.11228
CNAG_13093	-	unspecified product	52	37	30	13	12	7	1.64441e-05	-2.39286	4.03167e-06	21.2497	0.190405	4.78399
CNAG_03056	-	hypothetical protein	810	682	674	225	170	236	1.2e-44	-2.2946	1.48e-46	205.268	0.203825	43.9195
CNAG_00378	-	hypothetical protein	102	81	153	27	25	49	6.5e-09	-2.25985	9.09e-10	37.511	0.208794	8.18733
CNAG_12271	-	unspecified product	39	27	42	12	4	19	0.00042768	-2.1617	0.000137249	14.5395	0.223493	3.36888
CNAG_12869	-	unspecified product	177	139	184	58	26	79	9.51e-10	-2.14956	1.17e-10	41.5202	0.225381	9.02197
CNAG_13013	-	unspecified product	685	429	575	162	176	208	1.11e-24	-2.14094	3.35e-26	112.13	0.226732	23.9543
CNAG_12407	-	unspecified product	192	184	244	75	49	88	5.26e-15	-2.06948	3.39e-16	66.5642	0.238245	14.2793
CNAG_01621	-	hypothetical protein	13719	17789	16588	4738	4451	7409	2.66e-32	-2.06131	5.21e-34	147.814	0.239598	31.5745
CNAG_13066	-	unspecified product	41	27	35	20	7	9	0.000734058	-2.02534	0.000247394	13.4318	0.245648	3.13427
CNAG_12546	-	unspecified product	45	41	53	19	17	15	1.44337e-05	-1.95258	3.49417e-06	21.5241	0.258353	4.84062
CNAG_12372	-	unspecified product	168	106	123	59	44	46	6.77e-10	-1.92113	8.22e-11	42.2048	0.264047	9.16965
CNAG_05022	-	hypothetical protein	162	120	126	58	49	46	2.3e-11	-1.92096	2.28e-12	49.2302	0.264078	10.6389
CNAG_02752	-	Short-chain dehydrogenase	1737	1849	1826	742	647	650	2.34e-52	-1.91599	2.1e-54	241.25	0.26499	51.6309
CNAG_07836	-	NAD binding dehydrogenase	41	44	46	28	10	12	0.000401462	-1.89857	0.000128144	14.6689	0.268209	3.39636
CNAG_02706	-	hypothetical protein	90	34	64	29	21	24	0.000104554	-1.85308	2.97349e-05	17.4347	0.276802	3.98066
CNAG_04313	-	NADPH2 dehydrogenase	2432	2849	2716	1101	943	1178	2.53e-54	-1.82606	1.99e-56	250.529	0.282034	53.5969
CNAG_00289	-	hypothetical protein	1345	1295	1189	550	480	517	3.04e-47	-1.81697	3.53e-49	217.286	0.283816	46.5172
CNAG_06530	IDH1	Inositol 2-dehydrogenase	838	753	875	329	313	368	4.91e-41	-1.79998	6.58e-43	188.553	0.287178	40.3091
CNAG_02941	LPI17	hypothetical protein	1463	1162	1597	638	473	651	2.3e-27	-1.77635	5.92e-29	124.699	0.291921	26.6374
CNAG_02777	PHO84	phosphate:H symporter, variant	8824	3730	7251	3051	2529	2656	1.96e-12	-1.77139	1.66e-13	54.376	0.292927	11.7077
CNAG_07516	-	hypothetical protein	46	16	24	18	12	6	0.0136287	-1.74741	0.00625045	7.47664	0.297836	1.86555
CNAG_12960	-	unspecified product	100	96	123	46	38	53	6.56e-09	-1.73517	9.2e-10	37.4883	0.300373	8.18327
CNAG_01473	-	hypothetical protein	166	214	169	83	63	94	7.12e-12	-1.71203	6.49e-13	51.6938	0.30523	11.1473
CNAG_03166	-	hypothetical protein	492	356	431	235	151	184	9.32e-15	-1.67668	6.22e-16	65.3649	0.312803	14.0305
CNAG_07450	-	hypothetical protein	664	652	667	277	289	347	3.88e-32	-1.63236	7.63e-34	147.056	0.322561	31.4114
CNAG_01716	-	hypothetical protein	2959	3334	3001	1451	1318	1512	2.56e-53	-1.63032	2.2e-55	245.74	0.323016	52.5917
CNAG_01577	-	glutamate dehydrogenase (NADP)	59535	51529	56618	26341	26250	25666	1.29e-50	-1.60532	1.25e-52	233.113	0.328664	49.8909
CNAG_13010	-	unspecified product	254	158	190	87	87	109	4.6e-10	-1.60195	5.45e-11	43.0087	0.329431	9.33762
CNAG_12367	-	unspecified product	181	96	127	48	66	77	1.87188e-06	-1.59246	3.88e-07	25.7529	0.331606	5.72772
CNAG_06517	-	cytoplasmic protein	4572	3291	4477	2013	1825	2011	4.54e-28	-1.58625	1.13e-29	127.99	0.333036	27.3427
CNAG_05009	-	Integral membrane protein	1813	1414	1535	733	762	790	3.9e-31	-1.56741	8.2e-33	142.339	0.337413	30.409
CNAG_00235	AMT1	amt family ammonium transporter	2528	2377	3258	1353	1111	1520	2.2e-24	-1.55177	6.84e-26	110.713	0.341091	23.6579
CNAG_12100	-	unspecified product	19	28	30	10	8	20	0.0134485	-1.55082	0.00615294	7.50496	0.341316	1.87133
CNAG_12746	-	unspecified product	17	14	18	10	6	8	0.0333512	-1.54247	0.0171657	5.67936	0.343298	1.47689
CNAG_04417	-	alpha-ketoglutarate-dependent 2,4- dichlorophenoxyacetate dioxygenase	523	523	710	246	329	286	7.52e-14	-1.53226	5.52e-15	61.0658	0.345735	13.1238
CNAG_00434	-	arginine N-methyltransferase 2	2102	1624	1800	869	832	1036	1.34e-30	-1.52729	2.9e-32	139.828	0.346928	29.8725
CNAG_03410	-	cytoplasmic protein	5569	4861	5184	2603	2457	2689	6.24e-54	-1.52047	5.07e-56	248.669	0.348572	53.2047
CNAG_12948	-	unspecified product	20	11	17	8	6	10	0.0422773	-1.51795	0.0224668	5.20927	0.349183	1.37389
CNAG_13069	-	unspecified product	45	15	25	8	10	25	0.0318615	-1.51669	0.0163088	5.76927	0.349487	1.49673
CNAG_05638	-	hypothetical protein	12059	13714	11758	5686	6215	6958	1.05e-39	-1.50478	1.5e-41	182.338	0.352385	38.9792
CNAG_02561	-	spermine transporter	997	1221	984	450	564	600	5.22e-20	-1.49932	2.14e-21	90.208	0.35372	19.2823
CNAG_05170	PIP2	hypothetical protein	1229	1627	1071	712	628	650	1.08e-16	-1.48977	5.84e-18	74.575	0.35607	15.967
CNAG_01192	-	hypothetical protein	1210	831	1019	535	480	546	8.39e-20	-1.48111	3.52e-21	89.2279	0.358213	19.0761
CNAG_12038	-	unspecified product	25	13	26	4	11	18	0.0492652	-1.48039	0.0266891	4.91081	0.358392	1.30746
CNAG_04440	-	thiamine pyrophosphokinase, variant	1052	882	943	481	506	489	3.34e-26	-1.46927	9.17e-28	119.265	0.361165	25.4759
CNAG_00131	-	Alcohol dehydrogenase	147	131	135	74	64	76	2.91e-09	-1.46047	3.87e-10	39.1774	0.363376	8.53548
CNAG_06820	-	hypothetical protein, variant	3364	3195	4150	1783	1744	2023	1.41e-29	-1.46044	3.22e-31	135.051	0.363381	28.8493
CNAG_00999	-	hypothetical protein	2459	2136	2235	1298	1144	1089	1.6e-27	-1.45688	4.1e-29	125.43	0.364279	26.7952
CNAG_03538	-	hypothetical protein	384	212	342	154	154	180	5.01e-09	-1.45355	6.89e-10	38.0513	0.365121	8.30031
CNAG_05061	-	hypothetical protein, variant	62	32	71	25	27	34	0.00143472	-1.45337	0.000520401	12.0411	0.365167	2.84323
CNAG_10502	-	unspecified product	132353	209038	341229	100118	98064	163482	0.00297316	-1.4438	0.0011647	10.5455	0.367597	2.52678
CNAG_12574	-	unspecified product	124	54	118	59	48	48	0.000257247	-1.43865	7.90433e-05	15.581	0.368911	3.58965
CNAG_02738	-	hypothetical protein	3911	3077	3793	1895	1874	1891	2.99e-29	-1.43647	6.95e-31	133.521	0.36947	28.524
CNAG_12161	-	unspecified product	457	281	329	207	162	193	2.6e-10	-1.43537	2.98e-11	44.1885	0.369752	9.58462
CNAG_13103	-	unspecified product	72	39	50	20	21	45	0.00296615	-1.43351	0.00116049	10.5522	0.370229	2.52781
CNAG_02149	-	hypothetical protein	147	142	164	76	68	98	6.63e-09	-1.42183	9.31e-10	37.4636	0.373238	8.17869
CNAG_04355	-	hypothetical protein	618	487	615	354	316	237	3.22e-11	-1.4217	3.28e-12	48.5149	0.373271	10.4927
CNAG_12361	-	unspecified product	75	38	65	25	32	38	0.000986773	-1.41789	0.000342635	12.8216	0.374259	3.00578
CNAG_02532	-	D-amino-acid oxidase	1353	863	1128	651	547	588	7.52e-15	-1.41256	4.94e-16	65.8204	0.375644	14.1236
CNAG_00444	-	hypothetical protein	1466	851	1141	601	527	732	1.57e-12	-1.41072	1.32e-13	54.8261	0.376125	11.8027
CNAG_12536	-	unspecified product	58	49	84	42	22	39	0.000825286	-1.4103	0.000281995	13.1864	0.376233	3.0834
CNAG_06391	-	hypothetical protein	307	179	335	151	144	150	1.45e-07	-1.39104	2.49e-08	31.0696	0.381289	6.83978
CNAG_05717	-	hypothetical protein	913	677	867	427	446	466	2.28e-18	-1.38406	1.03e-19	82.546	0.38314	17.6417
CNAG_04474	-	monocarboxylic acid transporter	1095	865	1139	644	488	564	2.76e-17	-1.37996	1.39e-18	77.4103	0.384228	16.5599
CNAG_05697	-	hypothetical protein	1010	1021	1481	702	556	698	8.65e-14	-1.35834	6.41e-15	60.7711	0.390031	13.0631
CNAG_02691	-	hypothetical protein	1386	4753	3071	1275	1612	2306	0.0182196	-1.35213	0.00862031	6.89985	0.391714	1.73946
CNAG_03570	-	hypothetical protein	26	29	42	8	22	25	0.0261606	-1.3335	0.0130208	6.16628	0.396806	1.58235
CNAG_06071	-	hypothetical protein	788	821	870	406	451	553	2.2e-20	-1.32874	8.78e-22	91.9738	0.398116	19.6566
CNAG_01529	-	solute carrier family 25 (mitochondrial phosphate transporter), member 23/24/25/41	2036	2134	1776	1122	914	1373	2.06e-20	-1.32276	8.14e-22	92.1255	0.399768	19.6859
CNAG_03386	-	solute carrier family 25 (mitochondrial carnitine/acylcarnitine transporter), member 20/29	4552	3943	4508	2587	2476	2343	5.65e-27	-1.317	1.47e-28	122.893	0.401368	26.2482
CNAG_13141	-	unspecified product	163	73	125	78	53	77	0.000259256	-1.31001	7.97244e-05	15.5648	0.403318	3.58627
CNAG_00005	-	TPR repeat-containing protein	231	257	282	170	136	141	4.94e-10	-1.29339	5.89e-11	42.8583	0.407991	9.30586
CNAG_12469	-	unspecified product	20	23	20	11	10	16	0.0372582	-1.28791	0.0194789	5.458	0.409545	1.42878
CNAG_05086	URM1	ubiquitin-related modifier	1770	1268	1591	1012	792	899	8.28e-16	-1.28562	5.03e-17	70.324	0.410193	15.0817
CNAG_03894	PDR802	Putative Zn2-Cys6 zinc-finger transcription factor	56	59	80	50	31	33	0.00113243	-1.28304	0.00040059	12.5294	0.410928	2.94599
CNAG_12608	-	unspecified product	67	69	59	24	38	53	0.00123956	-1.28133	0.000441534	12.3477	0.411416	2.90673
CNAG_02422	-	hypothetical protein	2203	1992	2146	1305	1129	1290	5.18e-33	-1.27878	9.75e-35	151.145	0.412144	32.2856
CNAG_02039	-	integral membrane protein, variant	41	48	28	28	17	24	0.00899362	-1.27708	0.0039345	8.3138	0.412629	2.04607
CNAG_02421	-	hypothetical protein	7005	6720	6056	4022	3653	3997	4.09e-35	-1.27086	7.08e-37	160.931	0.414412	34.3887
CNAG_06448	-	Cystathionine gamma-lyase	123	84	67	59	39	65	0.000474605	-1.26818	0.000154175	14.3205	0.415184	3.32367
CNAG_03196	URA5	Orotate phosphoribosyltransferase	8470	6457	7086	4306	4217	4513	1.04e-24	-1.26439	3.12e-26	112.27	0.416275	23.9833
CNAG_05266	-	membrane protein	168	168	195	120	85	111	6.17e-08	-1.26267	1.01e-08	32.8231	0.416771	7.20955
CNAG_13015	-	unspecified product	54	32	44	31	20	27	0.00649238	-1.24964	0.0027309	8.97907	0.420552	2.1876
CNAG_06379	-	N-acetyltransferase 10	14899	11394	14221	8744	7732	7814	2.34e-20	-1.24432	9.41e-22	91.8376	0.422107	19.6308
CNAG_13155	-	unspecified product	23	17	28	15	11	15	0.0401363	-1.24409	0.0212057	5.30981	0.422173	1.39646
CNAG_01648	H4	Histone H4	40097	26150	36076	22112	17454	22149	1.1e-14	-1.2424	7.36e-16	65.0355	0.42267	13.9595
CNAG_03481	-	ribonuclease P protein component	922	872	1060	608	550	560	2.45e-18	-1.24008	1.12e-19	82.3939	0.423348	17.6107
CNAG_01963	-	CMP/dCMP deaminase zinc-binding protein	438	287	386	228	192	252	1.77e-09	-1.23934	2.26e-10	40.2261	0.423565	8.75227
CNAG_02412	-	rRNA-processing protein CGR1	3373	2106	2670	1848	1431	1636	4.55e-12	-1.23854	4.02e-13	52.6358	0.4238	11.3416
CNAG_00676	VPS28	ESCRT-I complex subunit VPS28	1552	1057	1482	917	703	855	1.09e-12	-1.23649	8.94e-14	55.5863	0.424403	11.9617
CNAG_12827	-	unspecified product	1929	1402	2083	1110	910	1274	3.4e-13	-1.23372	2.67e-14	57.966	0.42522	12.4686
CNAG_03897	-	protein BCP1	3372	2918	3385	2092	1853	1934	1.43e-25	-1.22661	4.03e-27	116.329	0.42732	24.8447
CNAG_12745	-	unspecified product	40	22	26	12	17	25	0.033436	-1.22316	0.0172278	5.67302	0.428343	1.47579
CNAG_05367	-	hypothetical protein	6346	4240	5246	2982	2963	3757	3.39e-15	-1.22071	2.15e-16	67.4619	0.429073	14.4695
CNAG_00750	-	hypothetical protein	4295	2717	4153	2191	2082	2573	1.83e-12	-1.21865	1.54e-13	54.512	0.429686	11.7365
CNAG_02378	-	H/ACA ribonucleoprotein complex subunit 2	13888	10819	13234	7829	7312	8086	5.37e-25	-1.21755	1.58e-26	113.619	0.430012	24.2696
CNAG_07456	-	hypothetical protein, variant	51	42	73	40	28	34	0.00365326	-1.21421	0.00145178	10.1388	0.431008	2.43732
CNAG_02418	-	asparagine-tRNA ligase	34541	32881	33325	19697	20810	21397	3.49e-39	-1.21078	5.11e-41	179.896	0.432035	38.4571
CNAG_06994	-	hypothetical protein	1317	1280	1321	840	767	805	1.71e-26	-1.20874	4.66e-28	120.607	0.432648	25.7659
CNAG_04030	-	hypothetical protein, variant	2235	1211	1587	1171	877	1055	1.31e-08	-1.20786	1.92e-09	36.0531	0.43291	7.88378
CNAG_03975	ERB1	ribosome biogenesis protein ERB1	13422	11520	12379	7866	7840	7459	1.65e-25	-1.19302	4.7e-27	116.022	0.437387	24.783
CNAG_03476	-	Spermidine synthase	44198	35760	35330	23101	23986	24672	3e-23	-1.19148	9.95e-25	105.406	0.437852	22.5232
CNAG_03438	HXT1	hexose transporter	65251	63000	63478	38415	39253	42436	2.27e-45	-1.18463	2.74e-47	208.629	0.439937	44.6439
CNAG_04192	-	phosphoribosylformylglycinamidine synthase	23839	20411	22758	14487	13316	14348	6.64e-32	-1.17769	1.33e-33	145.952	0.442058	31.1781
CNAG_05062	PUt2	hypothetical protein	2539	2684	2325	1548	1592	1606	1.27e-24	-1.17738	3.85e-26	111.851	0.442154	23.8949
CNAG_05646	-	hypothetical protein	1973	1557	1652	1108	910	1261	3.2e-17	-1.17676	1.62e-18	77.1009	0.442343	16.495
CNAG_00270	-	mitochondrial protein	6408	4123	4893	3224	2924	3590	1.81e-13	-1.17588	1.38e-14	59.2616	0.442614	12.7414
CNAG_00758	-	regulatory protein Ral2	1670	1911	2355	1125	1244	1382	5.33e-14	-1.17399	3.83e-15	61.7851	0.443194	13.2729
CNAG_05401	-	hypothetical protein	3351	2523	3190	1989	1843	1877	2.09e-17	-1.17369	1.03e-18	77.9954	0.443287	16.6789
CNAG_04784	-	Monosaccharide transporter	37	32	46	20	22	31	0.0119498	-1.17313	0.00539969	7.74047	0.443459	1.92264
CNAG_00752	WDP12	transducin family protein	1065	1464	1130	577	816	928	4.23e-09	-1.17087	5.76e-10	38.4013	0.444154	8.37352
CNAG_02054	-	hypothetical protein	6297	5356	5793	3592	3479	4021	2.31e-31	-1.16495	4.81e-33	143.399	0.44598	30.6356
CNAG_07612	-	hypothetical protein	250	206	243	119	167	158	2.82e-07	-1.16143	5.12e-08	29.6703	0.44707	6.54916
CNAG_06272	-	hypothetical protein	1233	799	1175	717	651	674	1.99e-10	-1.15818	2.24e-11	44.7482	0.448078	9.70173
CNAG_01456	-	hypothetical protein, variant	70	53	71	26	40	59	0.00467731	-1.15475	0.00189784	9.64581	0.449143	2.33
CNAG_00092	-	mitochondrial protein	10344	7091	8650	5501	5250	6036	6.36e-16	-1.14646	3.8e-17	70.8769	0.451732	15.1964
CNAG_06294	-	hypothetical protein	1565	1643	1611	1035	813	1278	8.57e-16	-1.14587	5.23e-17	70.2487	0.451918	15.0669
CNAG_12794	-	unspecified product	257	218	284	171	139	181	1.65e-08	-1.14256	2.47e-09	35.5607	0.452954	7.78302
CNAG_00781	-	U6 snRNA-associated Sm-like protein LSm3	3766	2670	2957	1923	1838	2319	5.69e-15	-1.14145	3.68e-16	66.4017	0.453304	14.2451
CNAG_02712	BUD32	BUD32 protein kinase	3300	2948	2859	2048	1812	2021	4.06e-26	-1.14105	1.12e-27	118.868	0.45343	25.391
CNAG_07736	-	glucan endo-1,3-alpha-glucosidase agn1	862	479	788	542	448	376	4.07632e-06	-1.14005	8.97e-07	24.1371	0.453745	5.38973
CNAG_07536	-	DNA-directed RNA polymerase I subunit RPA43	2988	2342	2649	1798	1617	1770	7.73e-20	-1.13103	3.22e-21	89.4016	0.456589	19.1117
CNAG_07881	-	hypothetical protein, variant 2	86	24	59	49	28	33	0.0379404	-1.12637	0.0198916	5.42139	0.458067	1.4209
CNAG_07362	-	nucleolin	40417	26351	33332	24888	20354	20057	5.55e-11	-1.12087	5.85e-12	47.3806	0.459817	10.2559
CNAG_05239	-	cytoplasmic protein	1233	1037	1116	746	669	818	1.42e-19	-1.11355	6.05e-21	88.157	0.462155	18.8486
CNAG_07597	-	hypothetical protein, variant	230	141	234	160	121	116	8.16584e-05	-1.11233	2.26712e-05	17.9506	0.462545	4.088
CNAG_03792	-	tRNA adenylyltransferase	1564	1749	1503	1080	1020	1073	2.2e-20	-1.11133	8.75e-22	91.9813	0.462868	19.6569
CNAG_00536	-	hypothetical protein, variant	13659	7962	10169	6866	6381	7735	3.52e-10	-1.11119	4.1e-11	43.5647	0.462913	9.4536
CNAG_04072	-	60S ribosome subunit biogenesis protein Nip7	8396	4948	6841	5124	3912	4250	5.38e-09	-1.11057	7.44e-10	37.9006	0.463112	8.26947
CNAG_04571	-	dimethyladenosine transferase	3398	2656	3237	2202	1893	2032	4.29e-17	-1.10899	2.2e-18	76.5016	0.463618	16.3674
CNAG_01455	RPL39alpha	large subunit ribosomal protein L39	69404	42158	50210	36200	33157	37570	5.47e-11	-1.10673	5.75e-12	47.4128	0.464345	10.262
CNAG_01761	-	hypothetical protein	31598	33257	24386	17419	20119	21508	2.74e-14	-1.10602	1.92e-15	63.1444	0.464573	13.5621
CNAG_03634	-	DNA-directed RNA polymerase I subunit RPA49	4201	3713	3973	2757	2543	2550	3.74e-23	-1.10539	1.25e-24	104.952	0.464777	22.427
CNAG_02198	-	mitochondrial inner membrane protease ATP23	626	482	568	392	350	366	8.71e-12	-1.10507	8.03e-13	51.2738	0.46488	11.0599
CNAG_00585	-	hypothetical protein	1720	1491	1699	1153	962	1152	2.15e-20	-1.09987	8.52e-22	92.0336	0.46656	19.6671
CNAG_00303	-	high-affinity nicotinic acid transporter	94	72	83	53	40	74	0.00107311	-1.09925	0.000377628	12.6398	0.466759	2.96935
CNAG_03679	ACY1	hypothetical protein, variant	756	530	552	633	275	312	0.000314999	-1.09765	9.87251e-05	15.1609	0.467278	3.50169
CNAG_10500	-	unspecified product	272392	390723	723651	261135	257072	415664	0.0359318	-1.09639	0.018675	5.53169	0.467686	1.44452
CNAG_12452	-	unspecified product	258	129	162	146	112	106	0.000525998	-1.09605	0.000172681	14.1072	0.467795	3.27902
CNAG_07466	-	U3 small nucleolar RNA-associated protein 7, variant 1	36828	47949	83193	33354	30234	50376	0.0163865	-1.08587	0.00766233	7.11074	0.471109	1.78551
CNAG_03310	-	nicotinamide N-methyltransferase	2659	2200	2468	1702	1627	1579	8.02e-18	-1.08376	3.78e-19	79.9829	0.471796	17.0958
CNAG_02920	-	hydrolase	1456	1247	1363	963	830	941	2.14e-19	-1.0831	9.23e-21	87.3202	0.472015	18.6686
CNAG_06072	-	Chorismate mutase	2477	2143	2341	1510	1473	1715	1.51e-24	-1.07916	4.59e-26	111.504	0.473304	23.8224
CNAG_02926	-	hypothetical protein	1476	1570	1212	889	965	1019	3.74e-14	-1.07733	2.66e-15	62.5042	0.473906	13.427
CNAG_06997	-	tRNA-dihydrouridine synthase 3	615	507	594	428	354	381	1.32e-11	-1.06998	1.25e-12	50.4035	0.476325	10.8793
CNAG_06128	-	hypothetical protein	644	574	689	451	412	431	2.12e-13	-1.06807	1.62e-14	58.9454	0.476957	12.673
CNAG_03524	-	transmembrane receptor	5262	4086	5422	3687	2981	3362	4.6e-14	-1.06802	3.28e-15	62.0902	0.476973	13.3372
CNAG_00559	BZP3	bZip transcription factor, putative	1452	2803	1357	1213	1102	1545	3.55359e-05	-1.06102	9.25427e-06	19.6595	0.479293	4.44933
CNAG_03624	-	pescadillo	16545	12099	16355	11591	10013	9104	1.34e-10	-1.0539	1.48e-11	45.5568	0.481664	9.87146
CNAG_02508	-	hypothetical protein	3116	3262	2430	1925	1844	2307	7.11e-14	-1.05065	5.2e-15	61.1852	0.482751	13.1479
CNAG_04822	-	deoxyhypusine synthase	2104	1903	2207	1287	1490	1499	1.23e-16	-1.04703	6.78e-18	74.2792	0.483963	15.9087
CNAG_05623	-	chorismate synthase	19233	16902	17070	11619	12178	12901	2.25e-25	-1.04475	6.45e-27	115.393	0.484727	24.6472
CNAG_12800	-	unspecified product	59	55	77	37	36	60	0.00598876	-1.04443	0.00249329	9.14551	0.484836	2.22266
CNAG_05786	-	hypothetical protein, variant	180	158	180	125	94	141	5.3131e-06	-1.04255	1.19158e-06	23.5908	0.485468	5.27465
CNAG_05814	-	small subunit ribosomal protein S10e	155934	117642	120127	92099	88939	90615	4.03e-15	-1.04197	2.57e-16	67.1078	0.485663	14.3949
CNAG_02059	-	CCR4-Not complex subunit Caf16	1650	1328	1628	1063	992	1133	2e-16	-1.04175	1.13e-17	73.2782	0.485737	15.6991
CNAG_06906	TIF3	Translation initiation factor 4B	36369	29258	31486	22404	22232	22389	1.66e-19	-1.04157	7.14e-21	87.8271	0.485798	18.7787
CNAG_03817	-	cell growth-regulating nucleolar protein	6828	5559	6370	4575	4152	4221	5.29e-18	-1.0415	2.45e-19	80.8368	0.485823	17.2767
CNAG_06808	STE3alpha	pheromone a factor receptor	718	480	698	445	414	453	1.72e-08	-1.0402	2.59e-09	35.4721	0.486261	7.76434
CNAG_04795	-	adenine nucleotide transporter	878	820	921	567	592	656	1.13e-16	-1.03994	6.2e-18	74.4574	0.486348	15.946
CNAG_00590	-	para-aminobenzoate synthetase	9371	7896	8406	5553	5642	6621	5.4e-23	-1.03937	1.83e-24	104.202	0.486539	22.2672
CNAG_01390	-	adenine phosphoribosyltransferase	14465	11522	12386	7774	9283	9491	3.83e-15	-1.0392	2.43e-16	67.2212	0.486597	14.4174
CNAG_03724	-	ribosomal RNA methyltransferase Nop2	20039	16361	19906	13922	12329	12715	2.08e-17	-1.03823	1.02e-18	78.0196	0.486925	16.6823
CNAG_01489	CAS9	maltose O-acetyltransferase	146	70	81	64	64	79	0.0047311	-1.03266	0.0019241	9.62057	0.488809	2.32504
CNAG_03185	-	low temperature-responsive protein	1278	1137	1105	804	800	846	1.32e-17	-1.03181	6.34e-19	78.9593	0.489097	16.8809
CNAG_02852	-	4-aminobutyrate transaminase	19624	15597	14861	11676	11743	11418	2.1e-14	-1.02902	1.45e-15	63.6945	0.490042	13.6772
CNAG_05884	KAP123	importin beta-4 subunit	38000	29624	33888	26666	23388	20428	3.01e-11	-1.02782	3.06e-12	48.6501	0.49045	10.5211
CNAG_00011	-	hypothetical protein	1132	1080	1268	818	714	911	3.29e-16	-1.02507	1.9e-17	72.2413	0.491386	15.483
CNAG_01729	-	ATP-dependent RNA helicase DHX37/DHR1	4395	3872	4223	3123	2777	2859	9.25e-20	-1.01941	3.89e-21	89.0302	0.493318	19.034
CNAG_01629	-	multifunctional methyltransferase subunit TRM112	2256	1686	2061	1439	1339	1443	7.12e-14	-1.01677	5.21e-15	61.179	0.494222	13.1473
CNAG_07406	-	pheromone alpha	224	166	168	125	128	140	9.22138e-06	-1.01552	2.15073e-06	22.4555	0.494651	5.0352
CNAG_02768	-	hypothetical protein	218	177	177	157	115	131	1.09125e-05	-1.01513	2.58958e-06	22.0989	0.494784	4.96208
CNAG_00247	LYS9	alpha-aminoadipic semialdehyde synthase	923	981	990	654	612	785	1.75e-16	-1.01211	9.74e-18	73.5655	0.495819	15.7575
CNAG_03795	OGG1	N-glycosylase/DNA lyase	96	109	93	76	69	65	0.000391604	-1.01195	0.000124757	14.7194	0.495876	3.40715
CNAG_04988	-	Gly-Xaa carboxypeptidase	58	60	53	52	39	29	0.0127631	-1.01191	0.00580639	7.60943	0.49589	1.89404
CNAG_04236	PXP1	pyridoxal phosphate phosphatase phospho2	7317	6086	7030	4726	4384	5414	7.98e-21	-1.0061	3.06e-22	94.0589	0.497889	20.0978
CNAG_06385	-	GAF domain-containing protein, variant	2783	2200	2541	1736	1712	1888	6.36e-17	-1.00558	3.35e-18	75.6736	0.498071	16.1966
CNAG_02754	-	small subunit ribosomal protein S12e	121860	89719	99499	75498	71035	73742	1.66e-14	-1.00511	1.13e-15	64.1858	0.498233	13.7793
CNAG_00304	-	hypothetical protein	1631	1131	1185	1001	868	928	2.01e-09	-1.00466	2.6e-10	39.9545	0.498388	8.69687
CNAG_04694	PWP1	periodic tryptophan protein 1	15198	11492	13984	10379	8813	9651	1.49e-14	-1.00462	1.01e-15	64.4144	0.498401	13.8281
CNAG_01693	-	exosome complex component RRP45	2045	2103	2091	1537	1338	1572	2.06e-23	-1.00072	6.78e-25	106.167	0.49975	22.6851

## Sheet: Complete dataset for EZT1oe
Supplementary Data 2. RNA sequencing data for transcriptome analysis of EZT1, EZT2, or CBF1 overexpression strains compared with the wild-type strain.
Locus_tag	Gene_name	Function	H99_1	H99_2	H99_3	EZT1_1	EZT1_2	EZT1_3	padj	log2FoldChange	pvalue	stat	foldChange	log10padj
CNAG_00001	-	hypothetical protein	99	118	106	217	223	262	0.00612273	0.606688	0.00255735	9.0991	1.52276	2.21305
CNAG_00002	-	hypothetical protein	2632	1729	2114	2153	1798	1804	0.000123905	-0.675433	3.56953e-05	17.0876	0.626144	3.90691
CNAG_00003	-	drug transporter	507	343	490	1138	878	1078	0.000170275	0.695344	5.04355e-05	16.4317	1.61927	3.76885
CNAG_00004	-	hypothetical protein	1747	1592	1833	2750	2684	2807	0.175652	0.163608	0.11505	2.48345	1.12009	0.755346
CNAG_00005	-	TPR repeat-containing protein	231	257	282	170	136	141	4.94e-10	-1.29339	5.89e-11	42.8583	0.407991	9.30586
CNAG_00006	-	prohibitin-2	7045	6621	6927	11063	10459	12414	0.0214535	0.207914	0.0103667	6.57078	1.15502	1.6685
CNAG_00007	-	methionine-tRNA ligase	6743	6195	6475	7096	7118	7332	0.000282116	-0.357577	8.72051e-05	15.3953	0.780475	3.54957
CNAG_00008	-	hypothetical protein	3249	3974	2878	4872	4457	5064	0.99695	-0.00107895	0.993458	6.72247e-05	0.999252	0.0013267
CNAG_00009	-	calcium-binding protein	1574	1649	1222	2127	1930	2133	0.859787	-0.0326585	0.808409	0.0587959	0.977617	0.065609
CNAG_00010	-	cation transporter	3596	3619	3877	5262	5116	5791	0.780414	0.0322616	0.712284	0.136006	1.02261	0.107675
CNAG_00011	-	hypothetical protein	1132	1080	1268	818	714	911	3.29e-16	-1.02507	1.9e-17	72.2413	0.491386	15.483
CNAG_00012	-	hypothetical protein	3299	3057	3002	5470	5431	5760	0.00124816	0.323226	0.000444793	12.334	1.25113	2.90373
CNAG_00013	-	hypothetical protein, variant 2	631	781	676	1263	1059	1419	0.0316801	0.324285	0.0162004	5.781	1.25204	1.49921
CNAG_00014	-	hypothetical protein	954	916	1074	2023	1899	2073	1.31084e-05	0.516011	3.14937e-06	21.7233	1.43	4.88245
CNAG_00015	-	hypothetical protein	265	166	235	780	710	883	3.78e-12	1.32007	3.3e-13	53.0233	2.49678	11.4224
CNAG_00016	-	U6 snRNA-associated Sm-like protein LSm5	6756	4840	5383	5023	4577	5343	4.43e-07	-0.695299	8.31e-08	28.7322	0.617581	6.35392
CNAG_00017	-	hypothetical protein	454	417	460	1020	862	1097	1.03796e-06	0.647982	2.06e-07	26.9797	1.56697	5.98382
CNAG_00018	FZC6	hypothetical protein	3923	3924	3421	4348	4177	4817	0.0135428	-0.268236	0.00620106	7.49093	0.830334	1.86829
CNAG_00019	-	mitochondrial import inner membrane translocase subunit tim9	8420	5918	6951	6927	6589	7477	0.000157848	-0.53038	4.65218e-05	16.5848	0.692372	3.80176
CNAG_00020	-	hypothetical protein	1246	1167	1214	2026	1648	1979	0.325993	0.127899	0.23749	1.39543	1.0927	0.486792
CNAG_00021	-	S-adenosylmethionine decarboxylase proenzyme	3410	2532	3291	2349	2135	2081	2.05e-11	-0.997208	1.99e-12	49.4958	0.500969	10.689
CNAG_00022	-	cytochrome c heme-lyase	4912	4524	4385	4526	4392	5073	2.49e-07	-0.494174	4.47e-08	29.936	0.709968	6.60455
CNAG_00023	-	hypothetical protein	128	100	128	272	272	320	0.00025949	0.766953	7.98284e-05	15.5624	1.70167	3.58588
CNAG_00024	-	hypothetical protein, variant 2	61070	52784	54795	57496	56966	55085	1.00526e-05	-0.497781	2.37687e-06	22.2635	0.708195	4.99772
CNAG_00025	VCX1	vacuolar calcium exchanger	1797	1778	1620	4632	3737	4291	3.72e-11	0.774095	3.82e-12	48.2131	1.71012	10.4295
CNAG_00026	-	kynurenine aminotransferase	18599	15403	16770	15425	15558	16110	1.29e-08	-0.616276	1.89e-09	36.0824	0.652353	7.88994
CNAG_00027	-	transcriptional activator	817	995	718	902	948	1100	0.0869031	-0.291661	0.05099	3.8086	0.816961	1.06096
CNAG_00028	-	high-affinity nicotinic acid transporter, variant	508	472	691	677	559	788	0.241778	-0.241325	0.167041	1.9093	0.845968	0.616584
CNAG_00029	-	D-3-phosphoglycerate dehydrogenase	238	166	276	232	176	240	0.0197482	-0.584633	0.00945281	6.73521	0.666819	1.70447
CNAG_00030	-	D-3-phosphoglycerate dehydrogenase, variant	180	234	242	238	184	196	0.0097057	-0.595662	0.00428301	8.15976	0.661741	2.01297
CNAG_00031	MLR1	hypothetical protein	1509	1268	1629	1516	1323	1569	0.000132373	-0.511334	3.83627e-05	16.9507	0.701573	3.8782
CNAG_00032	-	2,4-dihydroxyhept-2-ene-1,7-dioic acid aldolase	192	120	188	403	295	373	0.0166458	0.58659	0.00780815	7.07696	1.50169	1.7787
CNAG_00033	-	hypothetical protein	16	6	33	73	89	87	0.00257403	1.67256	0.000988839	10.8483	3.1878	2.58939
CNAG_00034	RPL9B	large subunit ribosomal protein L9e	131238	103428	116509	103856	106277	108019	3.87e-08	-0.649427	6.17e-09	33.7808	0.637533	7.41185
CNAG_00035	-	hypothetical protein	308	334	244	1549	1413	1321	5.54e-25	1.76817	1.63e-26	113.551	3.40622	24.2567
CNAG_00036	SEC14-2	SEC14 cytosolic factor	118	153	125	740	808	807	7.14e-32	2.06387	1.44e-33	145.794	4.18106	31.1462
CNAG_00038	-	Alcohol dehydrogenase	1402	1410	1415	2187	1802	2210	0.773372	0.039083	0.704336	0.144	1.02746	0.111611
CNAG_00039	ZFC6	hypothetical protein	1620	1767	1830	3084	2648	3209	0.0223316	0.263777	0.0108684	6.4867	1.20062	1.65108
CNAG_00040	ERG11	cytochrome P450, family 51 (sterol 14- demethylase)	12995	10058	10261	13726	12178	11548	0.0287299	-0.335182	0.0144727	5.97955	0.792684	1.54167
CNAG_00043	-	hypothetical protein, variant	1582	1788	1566	2601	2617	2850	0.100754	0.198245	0.060356	3.52758	1.1473	0.996736
CNAG_00044	-	ribosome assembly protein 1	5374	5671	5206	7309	7643	8182	0.998901	-0.000426177	0.996322	2.12473e-05	0.999705	0.000477371
CNAG_00045	-	hypothetical protein	521	479	441	885	779	1020	0.00813438	0.38187	0.0035246	8.51382	1.30303	2.08968
CNAG_00046	-	26S proteasome regulatory subunit N8	6741	7521	6957	7081	8104	9095	0.00972928	-0.317748	0.00429701	8.15384	0.802321	2.01192
CNAG_00047	PKP1	pyruvate dehydrogenase kinase	370	381	353	2152	2267	2689	2.37e-69	2.17324	1.28e-71	320.242	4.51034	68.6249
CNAG_00048	-	Sugar transporter	66	62	83	95	77	108	0.765318	-0.108518	0.694178	0.1546	0.92754	0.116158
CNAG_00049	-	hypothetical protein	173	151	193	607	544	593	2.38e-13	1.24455	1.83e-14	58.7044	2.36944	12.6226
CNAG_00050	-	hypothetical protein	553	656	630	697	673	873	0.142887	-0.229901	0.0906724	2.8624	0.852693	0.845008
CNAG_00051	SNT1	putative set3c deacetylase complex subunit	5052	5666	5139	5107	4953	5664	1.43e-07	-0.524291	2.45e-08	31.0971	0.695301	6.84499
CNAG_00052	-	hypothetical protein	74	140	48	125	105	114	0.808609	-0.118853	0.745674	0.105202	0.92092	0.0922615
CNAG_00053	-	hypothetical protein	605	453	529	575	664	620	0.131307	-0.276594	0.0823555	3.01779	0.825537	0.881712
CNAG_00054	-	hypothetical protein	26	27	40	119	98	139	3.69406e-05	1.41878	9.63826e-06	19.5818	2.67359	4.4325
CNAG_00055	-	hypothetical protein	3667	3551	3383	4046	4611	4761	0.171523	-0.168688	0.112008	2.52566	0.889651	0.765677
CNAG_00056	-	hypothetical protein	2030	2192	1719	2367	2377	2740	0.202762	-0.179314	0.135923	2.22352	0.883123	0.693013
CNAG_00057	FPP1	fructose-1,6-bisphosphatase I	3279	3563	2369	14798	15652	14888	4.23e-28	1.79347	1.05e-29	128.139	3.46648	27.3733
CNAG_00058	-	T-complex protein 1 subunit epsilon	16216	16852	14645	16193	18170	19894	0.00589832	-0.32548	0.00244838	9.17877	0.798033	2.22927
CNAG_00059	-	hypothetical protein	635	580	574	794	596	698	0.0741654	-0.288082	0.0426134	4.11067	0.81899	1.1298
CNAG_00060	-	chaperone regulator, variant	2214	2382	1993	2520	2409	2747	0.0133495	-0.291523	0.00609285	7.52263	0.817039	1.87454
CNAG_00061	CIT1	citrate synthase, mitochondrial	81796	68372	65524	80878	83653	92940	0.037141	-0.254882	0.0194039	5.46474	0.838056	1.43015
CNAG_00062	-	26S proteasome regulatory subunit N3	8935	8442	9274	9074	9650	10862	0.00040026	-0.360693	0.000127711	14.6753	0.77879	3.39766
CNAG_00063	CSE4	Histone H3	1441	1554	1516	1477	1657	1841	0.00287235	-0.370365	0.00111956	10.6186	0.773587	2.54176
CNAG_00064	EMP24	COPII-coated vesicle protein	4601	3742	3966	5334	5676	6753	0.919684	0.0162699	0.887569	0.0199885	1.01134	0.0363614
CNAG_00065	-	ran-binding protein 1	18133	16101	15585	18219	17045	19327	0.000143626	-0.378886	4.20124e-05	16.7782	0.769031	3.84277
CNAG_00066	-	membrane protein	4110	4037	4251	6801	6400	7508	0.0128045	0.227691	0.00582681	7.6031	1.17096	1.89264
CNAG_00067	SSS1	protein translocase SEC61 complex gamma subunit	9527	6116	7258	8171	7560	8445	0.00883001	-0.430999	0.00385315	8.35175	0.741748	2.05404
CNAG_00068	-	specific RNA polymerase II transcription factor	1567	1393	1663	2176	1996	2109	0.643961	-0.0663844	0.555992	0.346692	0.955028	0.19114
CNAG_00069	-	hypothetical protein	0	0	0	0	0	0	1		1
CNAG_00070	-	hypothetical protein	2371	2373	1985	3790	3247	3705	0.220057	0.163715	0.149572	2.07661	1.12017	0.657466
CNAG_00072	-	protein disulfide-isomerase	5819	5581	5447	9054	8630	9852	0.0302573	0.19736	0.0153351	5.87755	1.1466	1.51917
CNAG_00073	FAR8	nuclear mRNA splicing protein	6000	7409	5776	7741	7687	8815	0.213105	-0.175094	0.144271	2.1318	0.88571	0.671406
CNAG_00074	-	protein PNS1	5107	6206	4361	9708	10334	9577	0.0105306	0.412766	0.00469755	7.99235	1.33124	1.97755
CNAG_00075	-	hypothetical protein	4089	2998	2907	4832	3082	3598	0.141126	-0.305217	0.0893813	2.88548	0.80932	0.850394
CNAG_00076	NDX6	A/G-specific adenine glycosylase	773	970	954	982	874	1152	0.0184627	-0.35937	0.00875351	6.87244	0.779505	1.7337
CNAG_00077	-	solute carrier family 26 (sodium-independent sulfate anion transporter), member 11	4270	4768	4697	5863	5943	6053	0.279173	-0.129487	0.197718	1.65915	0.914157	0.554127
CNAG_00078	-	vacuolar protein	2597	2285	2391	3890	3749	3638	0.339063	0.127029	0.248888	1.32954	1.09204	0.46972
CNAG_00079	-	hypothetical protein	356	600	338	848	874	1116	0.00982223	0.615288	0.00434289	8.13458	1.53186	2.00779
CNAG_00080	-	hypothetical protein	22	24	31	87	59	95	0.00501722	1.12575	0.00204933	9.50482	2.18215	2.29954
CNAG_00081	-	pre-mRNA-processing factor 6	6667	6655	6454	5891	5346	6332	1.34e-15	-0.683367	8.23e-17	69.3547	0.62271	14.8744
CNAG_00082	-	cytosolic Fe-S cluster assembly factor CFD1	1999	2054	1903	2309	2278	2826	0.0842771	-0.199011	0.0491901	3.86885	0.871148	1.07429
CNAG_00083	CCC1	hypothetical protein	2312	2967	2704	3239	3193	3650	0.209661	-0.175866	0.141578	2.16072	0.885236	0.678483
CNAG_00084	-	glutamine-tRNA ligase	16224	13178	14168	12182	11911	12098	1.25e-11	-0.774614	1.19e-12	50.5068	0.584545	10.9016
CNAG_00085	ASF1	histone chaperone ASF1	1000	753	1153	1543	1311	1622	0.581671	0.110138	0.486163	0.485008	1.07933	0.235322
CNAG_00086	-	N2,N2-dimethylguanosine tRNA methyltransferase	4527	4528	4888	4180	3980	4311	1.47e-12	-0.67081	1.22e-13	54.9812	0.628154	11.8338
CNAG_00087	-	hypothetical protein	2134	2391	2095	2633	2683	2902	0.0960736	-0.198461	0.0571031	3.61958	0.87148	1.0174
CNAG_00088	-	prohibitin PHB1	12392	9200	10549	12480	12233	13799	0.0633653	-0.249393	0.0356055	4.4159	0.84125	1.19815
CNAG_00089	-	exosome complex component RRP4	2549	2495	2535	2751	2627	3124	0.000241304	-0.347148	7.38182e-05	15.7104	0.786136	3.61744
CNAG_00090	-	hypothetical protein, variant	2049	2013	2053	2469	2574	2976	0.291658	-0.121327	0.208246	1.58358	0.919342	0.535125
CNAG_00091	-	hypothetical protein	1584	3969	1107	11242	13268	8671	0.0104551	1.81986	0.00465614	8.00838	3.53048	1.98067
CNAG_00092	-	mitochondrial protein	10344	7091	8650	5501	5250	6036	6.36e-16	-1.14646	3.8e-17	70.8769	0.451732	15.1964
CNAG_00093	-	hypothetical protein	1335	3578	926	4211	5105	4638	0.292702	0.748818	0.209135	1.57741	1.68042	0.533574
CNAG_00094	-	NAD-dependent epimerase/dehydratase	219	288	250	379	282	428	0.989144	0.00447948	0.980672	0.000586903	1.00311	0.00474028
CNAG_00095	-	hypothetical protein	0	0	0	0	0	0	1		1
CNAG_00096	-	hypothetical protein	692	779	804	1040	1016	1024	0.657088	-0.0710155	0.570074	0.322559	0.951968	0.182377
CNAG_00097	ITR1	myo-inositol transporter, putative	267	324	310	852	869	924	1.38e-12	1.04358	1.14e-13	55.1118	2.06134	11.8607
CNAG_00098	-	palmitoyl-protein thioesterase	807	802	717	1290	1222	1615	0.0221403	0.310715	0.0107612	6.50434	1.24032	1.65482
CNAG_00099	MCM3	minichromosome maintenance protein 3	4219	3603	4379	4555	4275	4564	0.00142529	-0.374179	0.000516805	12.054	0.771545	2.8461
CNAG_00100	-	stress-induced-phosphoprotein 1	16986	25800	17167	14417	20196	26085	0.0263228	-0.501824	0.0131164	6.15334	0.706213	1.57967
CNAG_00101	KEI1	Inositolphosphorylceramide synthase subunit Kei1 domain-containing protein	3798	2702	3280	4620	4134	4500	0.680894	-0.0700425	0.597174	0.27928	0.95261	0.166921
CNAG_00104	-	elongation factor 3	30221	23274	27649	35540	32866	31543	0.164949	-0.203931	0.107208	2.59491	0.868182	0.78265
CNAG_00105	-	pyridoxal reductase	186	257	299	382	361	390	0.696759	0.0999174	0.615631	0.252056	1.07171	0.156918
CNAG_00106	TCO5	Two-component-like sensor kinase	5358	5535	5695	12397	10672	12202	1.79e-09	0.577023	2.3e-10	40.1964	1.49177	8.74609
CNAG_00107	-	hypothetical protein	919	2550	861	5230	5365	5743	0.0171554	1.4024	0.00807041	7.01778	2.64341	1.7656
CNAG_00108	-	RuvB-like helicase 1	8645	8488	8219	8610	9033	10097	5.99786e-05	-0.381347	1.62686e-05	18.5827	0.767721	4.222
CNAG_00109	-	large subunit ribosomal protein L34, variant	5216	4594	4987	4811	4653	5560	6.26e-07	-0.4909	1.2e-07	28.0268	0.711581	6.2033
CNAG_00110	HPI3	hypothetical protein	2358	2276	2182	2587	2794	2480	0.0277708	-0.297611	0.0139457	6.04501	0.813599	1.55641
CNAG_00111	-	splicing factor 3A subunit 1	7863	8162	7665	8467	9152	9985	0.00519296	-0.290055	0.00212303	9.44001	0.817871	2.28459
CNAG_00115	-	chlorophyll synthesis pathway protein BchC	5246	5415	3415	3779	3419	3803	8.1e-07	-0.866117	1.57e-07	27.4992	0.548621	6.09151
CNAG_00116	-	small subunit ribosomal protein S3	150504	110850	111443	104127	100454	104104	2.48e-08	-0.779369	3.83e-09	34.7068	0.582622	7.6059
CNAG_00117	ERG24	c-14 sterol reductase	7171	5855	6442	7560	7755	7470	0.0293361	-0.278317	0.0148177	5.93801	0.824552	1.5326
CNAG_00118	-	hypothetical protein	1076	821	1064	889	960	897	0.000120724	-0.613393	3.46751e-05	17.1426	0.653658	3.9182
CNAG_00119	-	hypothetical protein	292	242	292	346	306	316	0.149182	-0.279036	0.0952908	2.78264	0.824141	0.826284
CNAG_00120	-	hypothetical protein	1443	1367	1567	1419	1227	1794	0.000312379	-0.498841	9.77605e-05	15.1795	0.707675	3.50532
CNAG_00121	GPD1	glycerol-3-phosphate dehydrogenase (NAD())	10745	10070	9737	14788	12754	13676	0.535267	-0.0767771	0.438586	0.599978	0.948173	0.27143
CNAG_00122	-	Alpha-amylase	3039	2714	2452	3721	3991	3177	0.630215	-0.0910723	0.54118	0.373357	0.938825	0.200512
CNAG_00123	-	hypothetical protein	141	151	150	463	478	636	3.5e-13	1.31778	2.75e-14	57.9051	2.49283	12.4558
CNAG_00124	CAS32	Capsule structure designer protein	1412	888	1429	3168	2823	2859	8.96419e-05	0.740994	2.50971e-05	17.7572	1.67133	4.04749
CNAG_00125	CRG1	Putative regulator of G-protein signaling protein	124	154	175	398	302	391	0.000474605	0.753012	0.000154168	14.3206	1.68531	3.32367
CNAG_00126	-	2-deoxy-D-gluconate 3-dehydrogenase	3737	3549	3882	4372	4026	5031	0.0150391	-0.248461	0.0069724	7.28007	0.841794	1.82278
CNAG_00127	-	hypothetical protein	981	883	1251	1528	1227	1424	0.655319	-0.0872077	0.568056	0.325946	0.941343	0.183547
CNAG_00128	-	hypothetical protein	58	48	102	97	52	66	0.310599	-0.463786	0.224137	1.47768	0.725081	0.507799
CNAG_00129	-	hypothetical protein	1244	966	1265	2410	1840	2112	0.025894	0.362456	0.0128722	6.18659	1.28561	1.5868
CNAG_00130	RCK2	CAMK/CAMK1/CAMK1-RCK protein kinase	5536	9096	5006	6676	8217	8799	0.321194	-0.241358	0.233244	1.42097	0.845949	0.493233
CNAG_00131	-	Alcohol dehydrogenase	147	131	135	74	64	76	2.91e-09	-1.46047	3.87e-10	39.1774	0.363376	8.53548
CNAG_00132	-	hypothetical protein, variant	92	103	145	3307	3442	3091	5.89e-114	4.35109	8.69e-117	527.756	20.4084	113.23
CNAG_00133	-	hypothetical protein	357	296	427	549	460	768	0.412838	0.194892	0.316849	1.00191	1.14464	0.384221
CNAG_00134	-	hypothetical protein	1082	1320	995	1587	1685	1757	0.753945	0.0564259	0.680495	0.169569	1.03989	0.12266
CNAG_00135	-	cyclophilin	2431	1648	1916	1803	1614	1977	2.03978e-05	-0.664826	5.0562e-06	20.8159	0.630765	4.69042
CNAG_00136	-	ubiquitin-activating enzyme E1	13796	16980	12205	19452	22049	24435	0.545878	0.105371	0.449361	0.572262	1.07577	0.262904
CNAG_00137	-	hypothetical protein	1714	1742	1736	4225	3885	3876	3.39e-10	0.699997	3.94e-11	43.6454	1.6245	9.47012
CNAG_00138	-	ubiquinone biosynthesis methyltransferase	7350	6437	6535	7364	7586	7922	0.00149503	-0.337803	0.000545835	11.9522	0.791246	2.82535
CNAG_00139	-	hypothetical protein	2823	3056	2885	5621	5370	6043	2.37245e-06	0.447367	5.04e-07	25.2493	1.36355	5.6248
CNAG_00140	-	U1 small nuclear ribonucleoprotein 70kDa	6312	6617	6735	6512	6151	8766	0.00167296	-0.395782	0.000616895	11.7243	0.760077	2.77651
CNAG_00141	-	monooxygenase	333	298	389	582	511	799	0.0631225	0.369702	0.0354458	4.42357	1.29209	1.19982
CNAG_00142	-	hypothetical protein	2737	2385	3189	2529	2266	2631	3.97e-07	-0.673977	7.36e-08	28.9678	0.626777	6.40161
CNAG_00143	-	phosphoribosylaminoimidazolesuccinocarboxamide synthase	12143	10402	10472	9239	9375	9593	1.01e-11	-0.734633	9.45e-13	50.9556	0.600971	10.9958
CNAG_00144	-	hypothetical protein, variant	228	227	279	328	307	390	0.886521	-0.033119	0.844119	0.0386626	0.977305	0.0523111
CNAG_00145	-	actin-2	2361	1972	2276	2759	2480	2812	0.0606846	-0.225827	0.0339276	4.49835	0.855104	1.21692
CNAG_00146	PBY101	5'/3'-nucleotidase SurE	2929	3080	3065	3786	3839	4223	0.236955	-0.125942	0.163039	1.94581	0.916405	0.625335
CNAG_00147	-	pre-mRNA-processing-splicing factor 8	35606	33839	32893	41399	42108	43681	0.0486497	-0.194676	0.0263198	4.93489	0.873769	1.31292
CNAG_00148	-	hypothetical protein	6573	8029	5795	11027	11954	12274	0.0678004	0.280438	0.0383851	4.28788	1.21456	1.16877
CNAG_00149	-	NADH dehydrogenase (ubiquinone) 1 alpha subcomplex 4	15857	12083	13564	16304	16459	19058	0.15214	-0.191157	0.09758	2.74466	0.875903	0.817756
CNAG_00150	PQP1	peptidase	11109	7829	10397	24449	21203	23065	7.92e-07	0.719659	1.54e-07	27.5443	1.64679	6.10136
CNAG_00151	-	transcription elongation regulator 1	4490	5420	4519	5004	5778	7099	0.188421	-0.206397	0.124905	2.35471	0.866699	0.724871
CNAG_00152	-	hypothetical protein	1201	1332	1314	1300	1253	1496	0.000130414	-0.439648	3.77467e-05	16.9815	0.737315	3.88468
CNAG_00153	-	hypothetical protein, variant	590	524	684	684	659	770	0.0782311	-0.279233	0.0452765	4.00831	0.824029	1.10662
CNAG_00154	-	oxidoreductase	1565	1526	1366	1562	1721	1653	0.00673235	-0.358959	0.00284757	8.90265	0.779727	2.17183
CNAG_00155	-	hypothetical protein	0	0	0	0	0	0	1		1
CNAG_00156	CRZ1	Putative zinc finger transcription factor	2218	3063	2159	4990	4718	5072	0.00278839	0.479678	0.00108375	10.6787	1.39443	2.55465
CNAG_00157	-	hypothetical protein	1939	2041	1707	2146	2264	2786	0.214949	-0.175362	0.145784	2.11582	0.885545	0.667664
CNAG_00158	HOC3	alpha-1,6-mannosyltransferase	316	359	340	636	540	620	0.0495592	0.311641	0.0268727	4.89897	1.24112	1.30488
CNAG_00159	-	hypothetical protein	984	689	837	1180	1159	1205	0.965057	-0.00978831	0.946664	0.0044751	0.993238	0.0154472
CNAG_00160	-	hypothetical protein	134	70	163	469	378	599	6.33e-07	1.45759	1.21e-07	28.0036	2.74649	6.19836
CNAG_00161	-	auxin-induced protein	538	415	401	1164	1044	1040	5.36799e-06	0.756263	1.20719e-06	23.5657	1.68911	5.27019
CNAG_00162	AOX1	alternative oxidase, mitochondrial	1419	11474	1290	1760	2375	3276	1	-1.46416	1	1.84731	0.362446
CNAG_00163	-	general transcription factor 3C polypeptide 4, variant	1032	1219	1105	2170	2239	2564	8.522e-06	0.54244	1.97306e-06	22.6211	1.45643	5.06946
CNAG_00164	-	hypothetical protein	154	140	217	413	307	485	0.00289904	0.716806	0.00113032	10.6009	1.64354	2.53775
CNAG_00165	-	methylthioadenosine phosphorylase	8687	7457	8323	11583	12197	12228	0.703722	0.0505586	0.623512	0.240962	1.03567	0.152599
CNAG_00166	-	ATP-dependent RNA helicase DBP8	3584	2957	3435	3567	3366	3750	0.000273663	-0.411337	8.43903e-05	15.4573	0.751926	3.56278
CNAG_00167	-	hypothetical protein	1196	1436	1111	2073	2019	2413	0.0477741	0.283455	0.0257756	4.97101	1.21711	1.32081
CNAG_00171	-	peroxin-2	1467	1197	1397	2097	2235	2124	0.272918	0.163645	0.192281	1.70005	1.12011	0.563967
CNAG_00172	-	kinesin	1561	1857	1592	1857	1970	1840	0.0216011	-0.328031	0.0104619	6.5545	0.796623	1.66552
CNAG_00173	-	hypothetical protein	802	683	743	1106	1042	1205	0.589907	0.0781871	0.494454	0.466819	1.05569	0.229216
CNAG_00174	-	hypothetical protein	1749	2058	1630	3381	3166	3881	0.00102384	0.425023	0.000357776	12.7407	1.34259	2.98977
CNAG_00175	-	hypothetical protein	1026	1081	865	2000	1889	2275	3.084e-05	0.538883	7.9176e-06	19.9577	1.45285	4.51089
CNAG_00176	-	glutamate carboxypeptidase, variant	14422	11090	11804	15839	16257	18555	0.636204	-0.0702061	0.547721	0.361416	0.952502	0.196404
CNAG_00177	-	hypothetical protein	48	39	68	209	239	358	1.02e-09	1.85673	1.25e-10	41.3785	3.62185	8.99309
CNAG_00178	-	DNA repair protein REV1	1403	1398	1450	2526	2250	2901	0.00192538	0.337314	0.000719678	11.4377	1.2634	2.71548
CNAG_00179	GPA2	guanine nucleotide-binding protein subunit alpha, variant	161	162	187	183	164	214	0.0836322	-0.377772	0.0487726	3.88316	0.769625	1.07763
CNAG_00180	-	ubiquitin carboxyl-terminal hydrolase L3	1456	1487	1447	1358	1309	1262	3.18e-08	-0.666371	4.98e-09	34.1963	0.63009	7.49714
CNAG_00181	FYV10	macrophage erythroblast attacher isoform 1	1046	1190	954	1591	1559	1818	0.392143	0.126243	0.297591	1.08496	1.09145	0.406556
CNAG_00182	VPS29	retrograde transporter, variant	2149	2037	1921	2237	2404	2732	0.0432552	-0.239997	0.0230556	5.16431	0.846747	1.36396
CNAG_00183	-	alternative cyclin Pcl12, variant	2646	4024	2292	2548	2159	2735	0.000105731	-0.784305	3.00954e-05	17.4118	0.580632	3.9758
CNAG_00184	-	pre-mRNA cleavage complex 2 protein Pcf11	6045	5515	5606	8225	7662	8131	0.845431	-0.0241224	0.791481	0.0699011	0.983419	0.0729217
CNAG_00185	-	hypothetical protein	2776	2774	2575	3977	3882	4518	0.388512	0.0948455	0.294113	1.1007	1.06795	0.410595
CNAG_00186	-	mitotic spindle organizing protein 1	364	214	256	370	302	301	0.284546	-0.28271	0.202118	1.62701	0.822046	0.545847
CNAG_00187	UBP16	ubiquitin carboxyl-terminal hydrolase 1	2719	2981	2822	2642	2793	3001	8.39e-07	-0.524903	1.63e-07	27.4273	0.695006	6.0762
CNAG_00188	-	endoplasmic reticulum protein	1712	1376	1444	1705	1771	1810	0.0360187	-0.285453	0.0187379	5.52582	0.820484	1.44347
CNAG_00189	-	hypothetical protein	1339	1215	1374	2228	2268	2603	0.00250608	0.342011	0.000959849	10.9035	1.26752	2.601
CNAG_00190	-	hypothetical protein	2150	2595	2206	4351	3992	4722	0.000932544	0.397119	0.000322085	12.9374	1.31688	3.03033
CNAG_00191	-	etoposide-induced protein	799	492	777	1178	989	1157	0.432343	0.174238	0.33469	0.930666	1.12837	0.364171
CNAG_00192	-	hypothetical protein	869	973	879	1737	1773	2024	1.42263e-05	0.511929	3.43543e-06	21.5566	1.42596	4.84691
CNAG_00193	GAT1	GATA type zinc finger protein asd-4	8268	8204	8298	9834	9229	9588	0.00203401	-0.298286	0.000764287	11.326	0.813218	2.69165
CNAG_00194	-	hypothetical protein	3537	2911	3243	4768	4835	4925	0.575142	0.0768495	0.478967	0.501215	1.05471	0.240225
CNAG_00195	-	exosome complex protein LRP1	2679	1710	2149	2161	1893	2174	0.000576987	-0.580012	0.000190981	13.9178	0.668958	3.23883
CNAG_00229	-	hypothetical protein	517	310	417	800	643	813	0.105354	0.346156	0.0636035	3.44084	1.27117	0.97735
CNAG_00231	-	hypothetical protein	645	846	765	707	636	786	9.22193e-05	-0.598376	2.58981e-05	17.6974	0.660497	4.03518
CNAG_00232	RPL30	large subunit ribosomal protein L30e	90444	63170	74579	61972	57749	61765	1.74e-09	-0.83837	2.22e-10	40.2651	0.559275	8.76012
CNAG_00233	-	chaperone protein	3522	2702	3130	4314	4201	5187	0.816844	0.0371058	0.755076	0.0973148	1.02605	0.0878608
CNAG_00234	-	tRNA-dihydrouridine synthase 4	1585	1450	1348	1808	1704	2022	0.150521	-0.176149	0.0963495	2.76495	0.885062	0.822404
CNAG_00235	AMT1	amt family ammonium transporter	2528	2377	3258	1353	1111	1520	2.2e-24	-1.55177	6.84e-26	110.713	0.341091	23.6579
CNAG_00236	-	8-Amino-7-oxononanoate synthase	1009	824	986	1036	839	955	0.00050488	-0.504585	0.000165003	14.1928	0.704863	3.29681
CNAG_00237	-	3-isopropylmalate dehydratase, large subunit	20714	21134	18524	19407	22681	21713	0.000667799	-0.426409	0.000223749	13.6203	0.744111	3.17535
CNAG_00238	-	isoleucine-tRNA ligase	45046	38398	44238	33344	32918	33666	3.26e-16	-0.860955	1.88e-17	72.2636	0.550588	15.487
CNAG_00239	YAP1	hypothetical protein	617	759	672	1297	1045	1317	0.031234	0.322528	0.0158916	5.81483	1.25052	1.50537
CNAG_00240	-	hypothetical protein	2489	2788	2163	3442	3094	3211	0.444649	-0.118849	0.346403	0.886589	0.920922	0.351982
CNAG_00241	-	protein AIR1/2	3292	3153	3303	3389	3380	3526	1.06698e-05	-0.429853	2.52806e-06	22.1451	0.742338	4.97184
CNAG_00242	-	hypothetical protein	2	11	15	58	31	53	0.00831853	1.81942	0.00361257	8.46896	3.5294	2.07995
CNAG_00243	-	hypothetical protein	1110	854	998	1249	1137	1452	0.371425	-0.140584	0.278032	1.17668	0.907152	0.430129
CNAG_00246	-	hypothetical protein	2313	2611	2086	3763	3746	4386	0.0538823	0.249773	0.0296343	4.73038	1.18902	1.26855
CNAG_00247	LYS9	alpha-aminoadipic semialdehyde synthase	923	981	990	654	612	785	1.75e-16	-1.01211	9.74e-18	73.5655	0.495819	15.7575
CNAG_00248	VPS36	ESCRT-II complex subunit VPS36	819	931	826	1136	964	1190	0.254229	-0.161051	0.177363	1.81958	0.894373	0.594775
CNAG_00249	-	hypothetical protein	1436	1636	1622	1795	1728	2070	0.0296452	-0.260913	0.015003	5.91611	0.83456	1.52805
CNAG_00250	-	hypothetical protein	1766	1371	1478	1817	1803	1552	0.0424973	-0.337152	0.0226151	5.19783	0.791603	1.37164
CNAG_00251	-	hypothetical protein	6	0	2	1	6	3	0.942482	-0.158563	0.916524	0.0109857	0.895917	0.0257268
CNAG_00252	-	transcription elongation factor B, polypeptide 1, variant	706	564	681	681	699	669	0.00572344	-0.434917	0.00236805	9.23984	0.739736	2.24234
CNAG_00253	-	hypothetical protein	1053	1415	1017	1358	1529	1703	0.55522	-0.115108	0.459304	0.547591	0.923313	0.255535
CNAG_00254	-	NADH dehydrogenase	998	1356	833	1134	1239	1415	0.204686	-0.264043	0.137372	2.20715	0.832751	0.688911
CNAG_00255	-	hypothetical protein	3641	2643	3117	4438	3297	4457	0.421672	-0.139979	0.324699	0.969924	0.907532	0.375026
CNAG_00256	-	Aspartate-semialdehyde dehydrogenase	15892	13198	13586	16201	15656	17546	0.00642842	-0.299185	0.00270005	8.99983	0.812711	2.1919
CNAG_00257	-	kinesin family member 21A, variant	4001	4405	4426	5198	5186	5401	0.0562632	-0.210153	0.0311305	4.64575	0.864446	1.24978
CNAG_00258	-	Fungal gamma tubulin complex family protein	1670	1534	2027	2532	2195	2315	0.64244	-0.0794542	0.554443	0.349417	0.946416	0.192167
CNAG_00259	-	bud site selection protein	5345	4483	5226	4403	4087	4170	7.7e-11	-0.75699	8.26e-12	46.7022	0.591729	10.1137
CNAG_00260	-	transformer-2 protein	6646	6435	5686	6616	6458	6535	8.35542e-05	-0.444085	2.32283e-05	17.9044	0.735051	4.07803
CNAG_00261	-	hypothetical protein	40289	30228	34184	47015	40862	45066	0.248952	-0.16446	0.173078	1.85608	0.892262	0.603884
CNAG_00262	-	hypothetical protein, variant	9	2	4	36	28	30	0.00414461	2.14139	0.00166487	9.88659	4.41187	2.38252
CNAG_00263	PTP4	serine/threonine/tyrosine-interacting protein	852	971	944	1497	1483	1801	0.0316286	0.27469	0.0161701	5.78428	1.20973	1.49992
CNAG_00264	-	nuclease I, variant	2214	2077	1731	3356	3384	3698	0.0320749	0.283464	0.0164417	5.75501	1.21711	1.49384
CNAG_00265	IDI1	isopentenyl-diphosphate delta-isomerase	7012	4721	5768	6648	5886	6004	0.00905979	-0.423052	0.00396791	8.29844	0.745845	2.04288
CNAG_00266	YFH7	hypothetical protein	751	987	839	1011	881	998	0.0263228	-0.346472	0.0131177	6.15316	0.786505	1.57967
CNAG_00267	-	hypothetical protein	497	623	520	757	844	843	0.723882	0.0670769	0.647248	0.209387	1.04759	0.140332
CNAG_00268	ILV2	acetolactate synthase, mitochondrial	20226	19089	17748	17803	16809	15744	1.36e-08	-0.684954	2.01e-09	35.9677	0.622026	7.86656
CNAG_00269	-	Sorbitol dehydrogenase	28	6	12	690	703	648	1.18e-55	4.96873	9e-58	256.698	31.3138	54.9278
CNAG_00270	-	mitochondrial protein	6408	4123	4893	3224	2924	3590	1.81e-13	-1.17588	1.38e-14	59.2616	0.442614	12.7414
CNAG_00271	-	INO80 complex subunit C	2053	1597	2034	2905	2624	2776	0.818969	0.039036	0.75808	0.0948657	1.02743	0.0867325
CNAG_00272	-	hypothetical protein	2585	2747	2593	3930	4068	3960	0.501835	0.0868218	0.404544	0.694777	1.06203	0.299439
CNAG_00273	-	hypothetical protein	491	396	532	696	597	562	0.584088	-0.11806	0.4885	0.479829	0.921426	0.233521
CNAG_00274	-	hypothetical protein	715	648	627	1313	1193	1270	0.00125474	0.415233	0.000447406	12.323	1.33351	2.90145
CNAG_00275	-	hypothetical protein	712	754	714	659	686	868	0.000376693	-0.493887	0.000119451	14.8013	0.71011	3.42401
CNAG_00276	-	hypothetical protein	440	344	406	518	457	590	0.522171	-0.119261	0.425158	0.636015	0.920659	0.282187
CNAG_00277	-	hypothetical protein	714	376	529	503	431	485	0.00260699	-0.698859	0.00100299	10.822	0.616059	2.58386
CNAG_00278	-	methionine aminopeptidase, type I	2031	2086	2253	3304	3342	3683	0.091614	0.186573	0.0540807	3.71021	1.13806	1.03804
CNAG_00279	-	hypothetical protein	13761	10100	11662	12311	12073	13269	0.00126594	-0.425314	0.000452022	12.3039	0.744677	2.89759
CNAG_00280	-	complement component 1 Q subcomponent-binding protein, mitochondrial	7386	6817	7583	7432	7133	8199	1.19593e-06	-0.448287	2.39e-07	26.6916	0.732912	5.92229
CNAG_00283	-	hypothetical protein	1136	994	1017	1533	1338	1505	0.817467	-0.0346972	0.755954	0.0965957	0.976237	0.0875296
CNAG_00284	-	efflux protein EncT, variant	178	207	230	527	488	588	3.8e-07	0.868487	7.03e-08	29.0573	1.82575	6.41995
CNAG_00285	-	hypothetical protein	1043	1335	1143	2404	2256	2507	0.000114548	0.513963	3.27742e-05	17.2497	1.42797	3.94101
CNAG_00286	NAB2	putative nuclear polyadenylated mRNA-binding protein	5633	6432	6404	7477	7887	9131	0.409576	-0.10565	0.313741	1.01486	0.929386	0.387666
CNAG_00287	-	cytoplasmic protein	12211	16031	10602	11819	15285	18186	0.14454	-0.293991	0.0918938	2.84088	0.815643	0.840012
CNAG_00288	-	oligoribonuclease	2576	1679	2161	2942	2658	3031	0.666823	-0.0820734	0.58127	0.304186	0.944699	0.17599
CNAG_00289	-	hypothetical protein	1345	1295	1189	550	480	517	3.04e-47	-1.81697	3.53e-49	217.286	0.283816	46.5172
CNAG_00290	-	Aminopeptidase	2616	2286	2406	3511	3319	3605	0.976631	0.00443192	0.963542	0.00208928	1.00308	0.0102693
CNAG_00291	-	hypothetical protein	2237	1885	2626	3145	2942	3347	0.879396	-0.0275359	0.833442	0.0442216	0.981095	0.0558156
CNAG_00292	-	zinc finger protein	13355	13066	13801	11110	12281	12941	7.55e-11	-0.65604	8.08e-12	46.745	0.634618	10.1221
CNAG_00293	RAS1	Ras-like protein	5599	5251	5002	6920	7129	7640	0.627545	-0.057188	0.538502	0.378322	0.961136	0.202355
CNAG_00294	-	splicing factor 45	4478	4506	3964	4234	4202	4358	1.0016e-06	-0.525743	1.98e-07	27.051	0.694601	5.9993
CNAG_00295	-	hypothetical protein	0	0	0	0	0	0	1		1
CNAG_00299	-	DNA repair protein rad5	1761	1805	2186	2811	2739	3278	0.47441	0.104531	0.37583	0.784298	1.07514	0.323846
CNAG_00300	SPC97	gamma-tubulin complex component 2	2006	2075	2242	3687	3253	3848	0.0172654	0.258148	0.00812851	7.00494	1.19594	1.76282
CNAG_00301	-	hypothetical protein	1284	1711	1061	3549	3505	3375	2.617e-06	0.855608	5.59e-07	25.049	1.80952	5.5822
CNAG_00302	-	hypothetical protein	496	461	792	593	660	664	0.111448	-0.37549	0.0680503	3.32943	0.770844	0.952926
CNAG_00303	-	high-affinity nicotinic acid transporter	94	72	83	53	40	74	0.00107311	-1.09925	0.000377628	12.6398	0.466759	2.96935
CNAG_00304	-	hypothetical protein	1631	1131	1185	1001	868	928	2.01e-09	-1.00466	2.6e-10	39.9545	0.498388	8.69687
CNAG_00305	-	chaperone activator	14714	20866	16254	15569	20205	23911	0.101291	-0.312082	0.0607149	3.51775	0.805479	0.994429
CNAG_00306	MTN2	Copper-detoxifying metallothionein 2	1232	1221	1061	2139	2124	2370	0.000542499	0.405585	0.000178313	14.0468	1.32463	3.2656
CNAG_00307	-	hypothetical protein	5141	4213	4365	4565	4728	5116	0.00018285	-0.438593	5.46549e-05	16.2794	0.737854	3.73791
CNAG_00308	-	gly-X carboxypeptidase	1964	1948	1883	2344	2426	2814	0.282707	-0.124345	0.200498	1.63874	0.91742	0.548664
CNAG_00309	-	membrane protein	1980	1727	2032	3815	3684	3995	7.77541e-06	0.492509	1.78969e-06	22.8085	1.40689	5.10928
CNAG_00310	ORC5	origin recognition complex subunit 5	1413	1539	1406	1708	1595	1735	0.00824043	-0.301042	0.00357343	8.48878	0.811666	2.08405
CNAG_00311	-	3-hydroxyisobutyryl-CoA hydrolase	8814	8986	8776	8869	9598	9981	3.82009e-05	-0.410688	9.98588e-06	19.5141	0.752265	4.41793
CNAG_00312	-	Synaptobrevin	1207	1242	1324	1834	1882	2513	0.15031	0.20565	0.0961961	2.7675	1.15321	0.823013
CNAG_00313	-	hypothetical protein	973	1079	1091	2443	2549	2647	2.19e-11	0.772169	2.16e-12	49.3374	1.70784	10.6588
CNAG_00314	-	hypothetical protein	680	594	802	1159	1127	1260	0.0953304	0.261717	0.0565911	3.63457	1.1989	1.02077
CNAG_00315	-	HHE domain-containing protein	0	0	0	0	0	0	1		1
CNAG_00316	HAM1	rdgB/HAM1 family non-canonical purine NTP pyrophosphatase	3004	2356	2768	2237	2173	2735	3.66e-08	-0.700297	5.79e-09	33.9031	0.615446	7.43612
CNAG_00317	-	hypothetical protein	1438	1651	1410	1420	1277	1581	1.38449e-06	-0.587156	2.79e-07	26.3886	0.665654	5.85871
CNAG_00318	-	arp2/3 complex 16 kda subunit	3067	2630	2830	3065	3006	3535	0.00160716	-0.34037	0.000590656	11.8052	0.789839	2.79394
CNAG_00319	-	hypothetical protein	5689	4530	4970	6461	5930	6404	0.111109	-0.20143	0.0677613	3.33643	0.869688	0.954249
CNAG_00320	-	anaphase-promoting complex subunit 3	1446	1470	1331	1907	1801	1945	0.439226	-0.0972212	0.340828	0.907313	0.934832	0.357312
CNAG_00321	-	dRaptor	65	104	93	198	160	170	0.0870875	0.500946	0.0511089	3.8047	1.41514	1.06004
CNAG_00322	-	hypothetical protein	630	809	700	876	803	1104	0.439059	-0.138818	0.34059	0.908208	0.908263	0.357477
CNAG_00323	-	hypothetical protein	1	0	4	11	6	11	0.166468	1.96382	0.108297	2.5789	3.90092	0.77867
CNAG_00326	-	hypothetical protein	5313	5768	5692	5167	5145	5310	1.06e-09	-0.611165	1.31e-10	41.2915	0.654668	8.97506
CNAG_00327	DAD2	DASH complex subunit DAD2	552	489	565	756	660	711	0.528887	-0.103796	0.431993	0.61746	0.930581	0.276637
CNAG_00328	-	DNA excision repair protein ERCC-5	790	1146	664	1265	1276	1629	0.487489	0.164362	0.389248	0.74129	1.12067	0.312035
CNAG_00329	-	NADH dehydrogenase (ubiquinone) 1 beta subcomplex 8	5426	5262	4571	5394	5212	6060	0.000429308	-0.384935	0.00013793	14.5302	0.765814	3.36723
CNAG_00330	-	transcription factor TFIIIB component b''	1273	1040	1085	1537	1158	1652	0.327611	-0.161836	0.238991	1.38653	0.893887	0.484642
CNAG_00331	-	anon-23da protein	22	20	36	57	57	68	0.11534	0.709316	0.0708233	3.26384	1.63503	0.938022
CNAG_00332	SIP4	hypothetical protein	789	782	835	2469	2318	2499	9.75e-25	1.08886	2.91e-26	112.405	2.12705	24.0111
CNAG_00333	-	hypothetical protein	1471	1350	1677	2320	2046	2493	0.506879	0.0954667	0.409405	0.680528	1.06841	0.295095
CNAG_00334	-	hsp75-like protein	367935	289131	300842	251822	260661	250520	6.91e-11	-0.833183	7.36e-12	46.9293	0.56129	10.1604
CNAG_00335	TAP42	hypothetical protein	2483	2396	2524	3428	3476	4189	0.560665	0.0697775	0.464912	0.534043	1.04955	0.251296
CNAG_00336	-	hypothetical protein	549	452	731	2169	1817	2443	3.24e-14	1.37594	2.29e-15	62.7961	2.59537	13.4891
CNAG_00337	-	hypothetical protein	3981	7263	4211	10838	10400	11302	0.0104255	0.562106	0.00464166	8.01402	1.47642	1.9819
CNAG_00342	-	hypothetical protein	2436	2625	1879	3220	3065	3712	0.949949	0.0126489	0.926054	0.00861372	1.00881	0.0222997
CNAG_00343	-	hypothetical protein	1462	1619	1391	1630	1476	1925	0.0061409	-0.346283	0.00256645	9.09261	0.786608	2.21177
CNAG_00344	-	hypothetical protein	550	707	740	948	918	937	0.925228	-0.0196424	0.895081	0.0173918	0.986477	0.0337513
CNAG_00345	-	porphobilinogen synthase	7182	6223	6171	5082	5029	5215	7.46e-16	-0.86104	4.5e-17	70.5456	0.550556	15.127
CNAG_00346	YPI1	hypothetical protein	478	650	428	561	602	763	0.347314	-0.209042	0.256012	1.29019	0.865112	0.459277
CNAG_00347	-	DEAH box polypeptide 36	1891	1989	1768	3263	3014	3327	0.020128	0.255399	0.00965737	6.69703	1.19367	1.6962
CNAG_00348	-	hypothetical protein	74	66	74	115	91	103	0.960223	0.0196	0.939927	0.00567944	1.01368	0.0176277
CNAG_00349	-	hypothetical protein	66	113	171	272	185	253	0.167388	0.503393	0.108978	2.56898	1.41754	0.776275
CNAG_00351	-	hypothetical protein	1736	1343	1480	1135	1042	1127	2.49e-13	-0.973364	1.92e-14	58.6163	0.509317	12.6046
CNAG_00352	-	A1 cistron-splicing factor AAR2	1522	1877	1765	2616	3066	3271	0.0544726	0.283147	0.0300125	4.70858	1.21685	1.26382
CNAG_00353	LPI16	3-oxo-5-alpha-steroid 4-dehydrogenase 1	654	541	676	885	823	1013	0.88278	0.0268661	0.838169	0.0417125	1.0188	0.0541475
CNAG_00354	-	vacuolar protein 8	7807	7670	7286	11286	10903	11509	0.60545	0.0571014	0.512172	0.429627	1.04037	0.217922
CNAG_00355	-	hypothetical protein	3821	3506	3804	3236	2677	3631	2.51e-11	-0.738455	2.51e-12	49.0402	0.599381	10.6011
CNAG_00356	-	survival factor 1	8197	8074	8288	16326	16820	17426	6.78e-09	0.533626	9.56e-10	37.4134	1.44756	8.16903
CNAG_00357	-	ribonuclease HI, variant	693	736	622	615	553	609	2.1e-07	-0.717353	3.73e-08	30.2859	0.608212	6.67872
CNAG_00358	-	tRNA dimethylallyltransferase	1149	1399	1590	2464	2372	2640	0.0232999	0.341906	0.0114278	6.39756	1.26743	1.63265
CNAG_00359	-	hypothetical protein	782	544	959	1197	941	1238	0.852031	0.0486002	0.799022	0.0648281	1.03426	0.0695445
CNAG_00360	-	nuclear protein SNF4, variant	130	186	166	446	418	525	2.6e-07	1.01133	4.69e-08	29.8398	2.01577	6.58536
CNAG_00361	RVS167	hypothetical protein	5852	5702	5162	6537	6695	6794	0.0271646	-0.247045	0.0135906	6.09056	0.84262	1.566
CNAG_00362	-	hypothetical protein	2164	2396	2430	2956	2812	3019	0.120253	-0.1798	0.0743874	3.18345	0.882825	0.919904
CNAG_00363	TCO6	Two-component-like sensor kinase	6917	8277	6756	8862	8937	9151	0.105706	-0.212576	0.0638942	3.4333	0.862995	0.975899
CNAG_00364	-	tRNA threonylcarbamoyladenosine biosynthesis protein	2572	2148	2620	2845	2911	3223	0.0840039	-0.219536	0.0489997	3.87536	0.858842	1.0757
CNAG_00365	-	lysophospholipid acyltransferase	3944	4272	4144	5295	5438	6311	0.684193	-0.0492182	0.601072	0.273381	0.96646	0.164821
CNAG_00366	-	hypothetical protein	49	42	40	92	71	116	0.108642	0.569779	0.0659358	3.38141	1.4843	0.964003
CNAG_00367	DYN5	dynactin 5	930	713	919	969	985	1008	0.0579053	-0.298179	0.032153	4.59032	0.813278	1.23728
CNAG_00368	-	vacuolar-sorting protein 53 long isoform	1648	1782	1704	1981	2153	2513	0.283244	-0.140602	0.201019	1.63495	0.90714	0.547839
CNAG_00369	MED6	hypothetical protein	1472	1409	1448	1715	1807	2195	0.390846	-0.112852	0.296276	1.09088	0.924758	0.407995
CNAG_00370	UBI1	Predicted ubiquitin-ribosomal 60s subunit protein L40a fusion protein	129224	95187	105629	93880	92043	92308	1.77e-08	-0.752445	2.67e-09	35.4076	0.593597	7.75206
CNAG_00371	-	methylglutaconyl-CoA hydratase	552	458	588	901	828	760	0.486979	0.135286	0.388541	0.743503	1.09831	0.31249
CNAG_00372	-	chromatin structure-remodeling complex protein RSC7	3123	3009	3046	3895	3503	4437	0.158165	-0.147986	0.102021	2.67367	0.902509	0.800889
CNAG_00373	-	glucan 1,3-beta-glucosidase	608	419	674	1573	1209	1256	0.000292576	0.740667	9.08701e-05	15.3175	1.67095	3.53376
CNAG_00374	-	hypothetical protein	672	628	615	4187	3460	4461	7.97e-80	2.14567	3.53e-82	368.736	4.42498	79.0986
CNAG_00375	GCN5	histone acetyltransferase	2180	2983	2660	2872	3135	3426	0.125937	-0.241691	0.0784617	3.09648	0.845753	0.899847
CNAG_00376	-	hypothetical protein	5	0	11	12	18	18	0.346847	1.07837	0.255625	1.2923	2.11165	0.459862
CNAG_00377	TOP2	DNA topoisomerase II, variant	7299	7900	8925	10161	11174	10397	0.468451	-0.109768	0.369554	0.805163	0.926737	0.329336
CNAG_00378	-	hypothetical protein	102	81	153	27	25	49	6.5e-09	-2.25985	9.09e-10	37.511	0.208794	8.18733
CNAG_00383	APT3	Aminophospholipid translocase, putative	5034	5141	5297	7650	7647	7693	0.592112	0.0638391	0.496958	0.461427	1.04524	0.227596
CNAG_00384	-	RAD51-like protein 2	707	510	658	908	822	905	0.930318	-0.0183398	0.901265	0.0153918	0.987368	0.0313684
CNAG_00385	-	20S proteasome subunit beta 3	4873	4583	4808	6011	5970	6621	0.194786	-0.127514	0.129737	2.29564	0.915407	0.710443
CNAG_00386	-	translation initiation factor 4G	26055	21528	19882	19564	18033	17205	7.13e-09	-0.804502	1.01e-09	37.306	0.57256	8.14699
CNAG_00387	LPI13	hypothetical protein	1234	1365	1092	1756	1658	1718	0.843628	-0.0331536	0.789067	0.0715684	0.977282	0.0738489
CNAG_00388	MSS4	1-phosphatidylinositol-4-phosphate 5-kinase	2062	2661	2266	3694	3273	3425	0.704253	0.0631088	0.624069	0.240191	1.04471	0.152271
CNAG_00389	-	mitochondrial protein	2423	2431	2261	2880	2681	3047	0.0197698	-0.236552	0.00946804	6.73234	0.848771	1.704
CNAG_00390	YMR1	myotubularin	1735	1736	1869	2429	2543	2786	0.833233	0.028221	0.776988	0.0802288	1.01975	0.0792334
CNAG_00391	-	hypothetical protein	387	483	424	542	474	468	0.0895626	-0.309875	0.0527156	3.75291	0.806712	1.04787
CNAG_00392	-	kelch repeat-containing protein, variant	681	791	680	873	825	889	0.086782	-0.244608	0.0509082	3.81129	0.844045	1.06157
CNAG_00393	GLC3	1,4-alpha-glucan-branching enzyme	4588	3742	3276	24077	23212	20252	2.57e-37	2.03921	4.18e-39	171.137	4.1102	36.5895
CNAG_00394	-	diphthamide biosynthesis protein 3	796	450	634	837	765	872	0.635781	-0.113476	0.547133	0.362479	0.924358	0.196692
CNAG_00395	-	structure-specific endonuclease subunit SLX1	589	619	668	1050	944	1347	0.0386689	0.313543	0.0203353	5.38288	1.24276	1.41264
CNAG_00396	PKA1	AGC/PKA protein kinase	1233	1369	1247	2346	2730	2714	9.04167e-05	0.509259	2.53474e-05	17.7383	1.42332	4.04375
CNAG_00397	-	2-oxoisovalerate dehydrogenase E1 component, beta subunit	293	249	237	384	409	481	0.309726	0.197124	0.223469	1.48196	1.14641	0.509023
CNAG_00398	-	hypothetical protein	2073	1825	1679	3557	3457	3552	0.000844283	0.414243	0.000288922	13.1409	1.3326	3.07351
CNAG_00399	-	transformer-2-beta isoform 3	1240	1528	1313	1849	1563	1731	0.237325	-0.177082	0.163382	1.94264	0.88449	0.624656
CNAG_00400	-	secondary thiamine-phosphate synthase enzyme, variant	4658	4117	3298	6299	5612	6369	0.601021	0.0878943	0.507391	0.439444	1.06282	0.22111
CNAG_00401	-	phosphatidylinositol glycan, class U	1821	1453	1991	2412	2286	2489	0.722411	-0.0603642	0.645666	0.211408	0.959022	0.141216
CNAG_00402	-	translation initiation factor 4G	14400	13311	12758	17854	18593	17297	0.481699	-0.0952152	0.382935	0.761259	0.936133	0.317224
CNAG_00403	-	mitochondrial protein	1548	1591	1379	2244	2259	2371	0.469615	0.0963976	0.370818	0.800921	1.0691	0.328258
CNAG_00404	-	RING zinc finger protein	291	407	300	756	685	802	0.000253438	0.655082	7.77797e-05	15.6115	1.57471	3.59613
CNAG_00405	KIC1	ste/ste20/ysk protein kinase	1517	1627	1573	2275	1997	2432	0.965526	-0.00646267	0.9476	0.00431931	0.99553	0.0152361
CNAG_00406	-	hypothetical protein	964	801	779	1102	987	1025	0.160754	-0.216024	0.103967	2.64361	0.860935	0.79384
CNAG_00407	-	glyoxal oxidase	9418	11456	8537	16627	14584	15234	0.345132	0.1503	0.254022	1.30105	1.1098	0.462014
CNAG_00408	PPH3	serine/threonine-protein phosphatase PP-X isozyme 1	1335	1450	1302	1990	1676	2085	0.885787	-0.0213745	0.843311	0.0390693	0.985294	0.0526705
CNAG_00409	-	hypothetical protein	2350	3022	2762	3553	3980	4652	0.684558	0.0690358	0.601566	0.272641	1.04902	0.16459
CNAG_00410	-	hypothetical protein	9687	9991	8584	9404	9827	10326	4.8495e-05	-0.444509	1.28855e-05	19.0274	0.734834	4.3143
CNAG_00411	-	nucleoporin p58/p45	3823	4082	3449	4042	4090	4240	0.000855152	-0.384854	0.000293042	13.1144	0.765857	3.06796
CNAG_00412	-	hypothetical protein	27	9	37	48	33	53	0.58633	0.357713	0.490735	0.474914	1.28139	0.231858
CNAG_00413	OFD1	putative oxidoreductase	12689	12771	11250	17292	16452	17387	0.810089	-0.0308794	0.747736	0.103444	0.978823	0.0914675
CNAG_00414	MAK32	Maintenance of killer protein 32, putative	454	422	418	1629	1545	1766	1.07e-35	1.42124	1.82e-37	163.633	2.67815	34.9697
CNAG_00415	CDC2801	CMGC/CDK protein kinase	1213	1473	1289	1686	1616	1770	0.248493	-0.159282	0.172628	1.85997	0.895471	0.604686
CNAG_00416	WDP9	f-box/wd-repeat protein lin-23	247	233	267	298	258	288	0.0721962	-0.334348	0.0412689	4.16494	0.793142	1.14149
CNAG_00417	-	elongation factor 1-gamma	94530	79803	79828	60835	62629	59821	1.21e-16	-0.976673	6.66e-18	74.3145	0.50815	15.9155
CNAG_00418	-	S-adenosylmethionine synthase	60227	40830	49768	46408	43086	39763	7.05776e-06	-0.72552	1.61323e-06	23.0081	0.604779	5.15133
CNAG_00419	-	DNA polymerase beta subunit	24	24	54	108	80	134	0.00849212	1.13562	0.00369318	8.42883	2.19714	2.07098
CNAG_00420	-	dolichyl-phosphate mannosyltransferase polypeptide 3	1178	948	1148	1136	916	1182	0.000170475	-0.531894	5.05159e-05	16.4287	0.691646	3.76834
CNAG_00421	-	charged multivesicular body protein 3	1149	1119	1011	1319	1196	1631	0.205587	-0.178825	0.138271	2.19709	0.883422	0.687004
CNAG_00422	-	hypothetical protein, variant	2497	2660	2742	3506	3360	3561	0.351154	-0.108759	0.259404	1.27194	0.927386	0.454503
CNAG_00423	-	kinetochore protein Spc24, fungi type	678	580	710	823	691	783	0.059185	-0.287394	0.0330091	4.54531	0.819381	1.22779
CNAG_00424	-	choline-phosphate cytidylyltransferase	3523	3905	2796	3926	3743	4226	0.0503008	-0.293158	0.0273244	4.8702	0.816114	1.29842
CNAG_00425	-	hypothetical protein	0	0	0	0	0	0	1		1
CNAG_00426	-	UBA/TS-N domain-containing protein	2084	2235	1810	3509	2792	3641	0.204848	0.182411	0.137598	2.20462	1.13478	0.688568
CNAG_00427	PTC5	type 2C protein Phosphatase	5261	4274	4401	6575	5401	6468	0.447342	-0.107479	0.349381	0.875704	0.928209	0.34936
CNAG_00428	-	hypothetical protein	1879	1427	1637	2242	2103	2271	0.570637	-0.088194	0.474513	0.511447	0.9407	0.24364
CNAG_00429	-	tRNA-dihydrouridine synthase 1	985	851	1068	874	907	959	1.58988e-05	-0.59292	3.88625e-06	21.3201	0.663	4.79863
CNAG_00430	-	hypothetical protein	377	391	361	422	428	439	0.0441977	-0.317561	0.023634	5.12129	0.802425	1.3546
CNAG_00433	-	hypothetical protein	445	310	410	1139	773	963	5.60797e-05	0.791536	1.50801e-05	18.7274	1.73092	4.25119
CNAG_00434	-	arginine N-methyltransferase 2	2102	1624	1800	869	832	1036	1.34e-30	-1.52729	2.9e-32	139.828	0.346928	29.8725
CNAG_00435	-	hypothetical protein	285	344	416	291	270	330	0.00015535	-0.744216	4.57474e-05	16.6167	0.596992	3.80869
CNAG_00436	-	palmitoyltransferase akr1	1576	1516	1735	2835	2361	3393	0.0208836	0.312534	0.0100553	6.62507	1.24189	1.6802
CNAG_00437	-	anaphase-promoting complex subunit 11	575	480	550	589	582	631	0.0195363	-0.342632	0.00932015	6.76043	0.788601	1.70916
CNAG_00438	-	hypothetical protein	493	437	477	462	476	505	0.00115404	-0.472927	0.000408716	12.4919	0.720501	2.93778
CNAG_00439	-	hypothetical protein	4050	4244	4284	4176	4246	4585	1.42079e-06	-0.46175	2.88e-07	26.3304	0.726105	5.84747
CNAG_00440	SSN801	RNA polymerase II holoenzyme cyclin-like subunit	699	725	762	818	748	876	0.0048492	-0.352598	0.00197682	9.57094	0.783172	2.31433
CNAG_00441	IMD1	inosine-5'-monophosphate dehydrogenase	49490	41959	45224	38481	39234	39218	9.14e-12	-0.731666	8.49e-13	51.1662	0.602208	11.039
CNAG_00442	-	cyclin	3899	4250	3475	3437	4166	3553	0.000224555	-0.561778	6.82805e-05	15.8579	0.677467	3.64868
CNAG_00443	-	hypothetical protein	171	132	208	775	668	757	9.9e-17	1.59574	5.29e-18	74.768	3.02249	16.0044
CNAG_00444	-	hypothetical protein	1466	851	1141	601	527	732	1.57e-12	-1.41072	1.32e-13	54.8261	0.376125	11.8027
CNAG_00445	NHP6B01	nonhistone chromosomal protein	4477	5986	4524	5744	5849	5734	0.0574251	-0.298255	0.0318511	4.6065	0.813236	1.2409
CNAG_00446	-	hypothetical protein	4	1	2	31	22	26	0.000522456	2.98678	0.000171438	14.1208	7.92703	3.28195
CNAG_00447	-	T-complex protein 1 subunit beta	21933	22207	21012	21148	23276	26052	0.000125964	-0.398237	3.63968e-05	17.0506	0.758785	3.89975
CNAG_00448	-	V-type H -transporting ATPase subunit AC39	7926	7698	7501	8050	8524	8780	0.000151415	-0.375558	4.44769e-05	16.6701	0.770807	3.81983
CNAG_00449	-	RNA-binding protein NOB1, variant	4758	4171	4577	5298	4769	4634	0.00227334	-0.38321	0.000862042	11.1027	0.766729	2.64333
CNAG_00450	LEU2	3-isopropylmalate dehydrogenase	12950	10444	12087	12323	11656	13566	0.000105719	-0.429973	3.00792e-05	17.4128	0.742276	3.97585
CNAG_00451	-	cytoplasmic protein	888	942	949	1231	1285	1580	0.770748	0.0449032	0.700747	0.147696	1.03161	0.113088
CNAG_00452	-	Isovaleryl-CoA dehydrogenase	52	33	47	2055	2244	2339	9.3e-181	5.14369	4.57e-184	837.127	35.3512	180.032
CNAG_00453	-	mitochondrial protein	2707	6696	2212	2670	2535	3147	0.108864	-0.993843	0.0660839	3.37771	0.502138	0.963117
CNAG_00454	-	hypothetical protein	10	90	13	91	81	121	0.26579	0.847311	0.186573	1.74448	1.79914	0.575461
CNAG_00455	UBP16	ubiquitin carboxyl-terminal hydrolase Ubp16	4269	3695	3705	3865	3071	3039	4.1e-07	-0.731946	7.64e-08	28.8951	0.602091	6.38674
CNAG_00456	ISP6	Identified spore protein 6	7075	5353	6591	6794	6111	8202	0.00835491	-0.365915	0.00363042	8.46	0.775976	2.07806
CNAG_00457	GLN1	glutamine synthetase, variant	65248	52980	57231	65372	63802	67045	0.00222322	-0.346721	0.000841123	11.1482	0.786369	2.65302
CNAG_00458	-	hypothetical protein, variant	5417	4862	4884	4690	4195	4388	7.4e-11	-0.700075	7.91e-12	46.7875	0.61554	10.131
CNAG_00460	LIV1	virulence related protein of unknown function	1677	1844	1492	2057	2492	2547	0.970506	-0.00759312	0.954927	0.00319461	0.994751	0.0130019
CNAG_00461	-	protein kinase C substrate 80K-H	4775	5946	5206	6437	7029	7970	0.577787	-0.0841541	0.481879	0.494607	0.943337	0.238233
CNAG_00462	-	electron-transferring-flavoprotein dehydrogenase	10246	9762	9622	9654	9606	10026	1.12e-08	-0.525342	1.62e-09	36.3877	0.694794	7.95213
CNAG_00463	-	hypothetical protein	0	1	1	1	0	3	0.900658	0.425746	0.862231	0.0301144	1.34327	0.04544
CNAG_00464	-	pre-mRNA-splicing factor rse1	10303	10016	10222	12152	12221	12293	0.0150391	-0.243625	0.00697314	7.27987	0.84462	1.82278
CNAG_00465	-	hypothetical protein	1136	1391	851	3118	2584	2880	5.36799e-06	0.834305	1.2067e-06	23.5665	1.783	5.27019
CNAG_00466	-	adaptin ear-binding coat-associated protein 2	782	709	563	815	784	869	0.148548	-0.245398	0.0947945	2.79101	0.843583	0.828133
CNAG_00467	-	hypothetical protein	468	446	424	462	434	543	0.00538754	-0.409215	0.00221233	9.36446	0.753033	2.26861
CNAG_00468	-	hypothetical protein	3139	2940	2708	3687	3394	4007	0.111956	-0.17681	0.0684154	3.32063	0.884657	0.950952
CNAG_00469	-	endoplasmic reticulum protein	2212	2025	2178	2564	2500	2811	0.0377132	-0.215106	0.0197563	5.4333	0.861483	1.42351
CNAG_00470	-	charged multivesicular body protein 1	1671	1594	1391	1632	1522	1965	0.00312264	-0.378757	0.00122556	10.4514	0.7691	2.50548
CNAG_00471	-	mitochondrial protein	3663	3310	3243	3660	3784	4415	0.00688088	-0.297238	0.00291801	8.85804	0.813809	2.16236
CNAG_00472	-	hypothetical protein	1398	1176	1574	2031	1798	2096	0.989867	0.00288575	0.982078	0.000504637	1.002	0.00442308
CNAG_00473	OST2	oligosaccharyltransferase complex subunit epsilon	2417	2009	2033	2609	2588	3219	0.339223	-0.132354	0.249047	1.32864	0.912342	0.469514
CNAG_00474	-	hypothetical protein	248	273	331	515	437	589	0.0753	0.338209	0.0433116	4.0832	1.26419	1.1232
CNAG_00475	-	WSC domain-containing protein	1877	1522	1697	2107	1849	1820	0.0250142	-0.325021	0.0123918	6.25393	0.798287	1.60181
CNAG_00476	-	hypothetical protein	14	3	22	65	68	50	0.00604915	1.73398	0.00252141	9.12499	3.32645	2.21831
CNAG_00480	-	hypothetical protein	1218	1648	1216	1045	1138	1277	3.74033e-06	-0.751111	8.19e-07	24.3125	0.594146	5.42709
CNAG_00481	-	hypothetical protein	0	0	0	0	0	0	1		1
CNAG_00482	-	26S proteasome regulatory subunit N10	7574	7530	7126	8631	9381	10293	0.139095	-0.162178	0.0880438	2.90978	0.893675	0.856689
CNAG_00483	ACT1	actin	63563	53094	56920	79886	71942	79932	0.441862	-0.0927194	0.343797	0.896221	0.937753	0.354714
CNAG_00484	-	2-oxoisovalerate dehydrogenase E2 component (dihydrolipoyl transacylase)	582	722	675	786	863	952	0.494346	-0.117425	0.396181	0.719885	0.921831	0.305969
CNAG_00485	-	hypothetical protein	227	626	234	1597	1185	1691	0.00718459	1.51918	0.0030627	8.76973	2.86629	2.1436
CNAG_00486	-	succinate dehydrogenase assembly factor 2, mitochondrial	2758	2703	2603	2796	2821	3496	0.00183479	-0.338245	0.000683112	11.5346	0.791003	2.73641
CNAG_00487	-	hypothetical protein	51	58	52	159	123	148	0.00135485	0.904729	0.000487767	12.1619	1.87219	2.86811
CNAG_00488	-	hypothetical protein, variant	214	283	310	614	582	723	7.20825e-05	0.734507	1.98353e-05	18.205	1.66383	4.14217
CNAG_00490	POT1	acetyl-CoA acyltransferase	1612	1254	1198	1847	1626	1868	0.48654	-0.116364	0.387951	0.745353	0.92251	0.312882
CNAG_00491	-	hypothetical protein	1425	1471	1381	1695	1460	1847	0.0112778	-0.288711	0.00505857	7.85838	0.818633	1.94778
CNAG_00492	-	hypothetical protein	32	21	46	106	102	128	0.000844283	1.24896	0.000289006	13.1403	2.3767	3.07351
CNAG_00493	-	hypothetical protein	1836	1983	1737	2345	2208	2303	0.0928093	-0.205479	0.0548777	3.6858	0.867251	1.03241
CNAG_00495	-	hypothetical protein	891	699	905	1467	1234	1606	0.0778966	0.272916	0.0450364	4.01728	1.20825	1.10848
CNAG_00496	-	hypothetical protein	1227	1359	1337	1305	1071	1406	4.21946e-06	-0.568598	9.32e-07	24.0642	0.674272	5.37474
CNAG_00497	-	hypothetical protein	1879	2311	1527	4361	4600	4600	7.07294e-06	0.73808	1.61844e-06	23.0019	1.66795	5.1504
CNAG_00498	CDC14	cell division cycle protein 14	1200	1171	1104	4128	4246	3977	8.25e-29	1.3245	1.95e-30	131.476	2.50447	28.0834
CNAG_00499	-	solute carrier family 25 (mitochondrial carnitine/acylcarnitine transporter), member 20/29	2443	2175	2327	2478	2377	2447	6.77533e-05	-0.43551	1.85774e-05	18.3298	0.739432	4.16907
CNAG_00500	PTC1	Protein phosphatase	4203	3552	2844	7066	5873	6377	0.031044	0.357267	0.0157663	5.82875	1.281	1.50802
CNAG_00501	-	hypothetical protein	237	191	241	406	427	381	0.0811382	0.355978	0.0471685	3.93937	1.27985	1.09077
CNAG_00502	-	large subunit ribosomal protein L35	2297	2082	2083	2476	2297	2375	0.00133768	-0.362334	0.000480925	12.1882	0.777905	2.87365
CNAG_00503	-	hypothetical protein	3717	2762	3088	7221	5908	6941	5.53513e-05	0.558044	1.4857e-05	18.7558	1.47227	4.25687
CNAG_00504	-	peptidyl-prolyl cis-trans isomerase-like 4	3168	3516	2886	3485	3158	3925	0.00196703	-0.371553	0.000737181	11.3931	0.77295	2.70619
CNAG_00505	FZC28	hypothetical protein	579	706	884	935	937	1073	0.738245	-0.0713462	0.662995	0.189906	0.951749	0.1318
CNAG_00506	-	hypothetical protein	911	929	891	1248	1247	1175	0.60545	-0.0793046	0.512159	0.429653	0.946514	0.217922
CNAG_00507	-	nitrilase	27	21	22	85	70	85	0.00093841	1.26534	0.000324457	12.9236	2.40383	3.02761
CNAG_00508	VPS17	vacuolar protein sorting-associated protein vps17	2075	2620	1898	2669	2600	3071	0.283228	-0.174591	0.200972	1.6353	0.886018	0.547864
CNAG_00509	-	translation initiation factor 3 subunit M	29467	23263	25098	23910	22402	23737	1.75e-08	-0.660017	2.64e-09	35.4356	0.632871	7.7576
CNAG_00510	GIM4	prefoldin subunit 2	3108	2529	2915	2707	2380	3052	9.49e-07	-0.585968	1.87e-07	27.1619	0.666202	6.02287
CNAG_00511	-	hypothetical protein	181	125	213	425	318	414	0.00788807	0.642807	0.00340429	8.57703	1.56136	2.10303
CNAG_00512	-	mitochondrial carrier protein	9217	8447	8772	9440	9524	9739	7.67626e-05	-0.389009	2.12459e-05	18.0742	0.763654	4.11485
CNAG_00513	-	nucleolar protein 53	7628	5398	6747	8628	7141	7269	0.084945	-0.285504	0.0496322	3.85384	0.820455	1.07086
CNAG_00514	-	hypothetical protein	3356	3302	3201	4199	4118	4566	0.213032	-0.124729	0.144196	2.1326	0.917176	0.671554
CNAG_00515	-	mannitol dehydrogenase, variant	228	237	205	546	400	573	0.000311671	0.663337	9.74523e-05	15.1854	1.58374	3.5063
CNAG_00516	PEX7	peroxin-7	474	545	540	863	876	854	0.144262	0.226797	0.0916871	2.8445	1.17023	0.840847
CNAG_00517	-	hypothetical protein	5565	3592	4290	5403	5241	5218	0.12995	-0.267126	0.0813128	3.03846	0.830973	0.886223
CNAG_00519	ERG3	lathosterol oxidase	5091	5544	4263	4435	4329	3652	1.51207e-06	-0.764722	3.07e-07	26.2043	0.588567	5.82043
CNAG_00520	-	hypothetical protein	14252	14480	13707	14278	14700	18201	0.000544551	-0.362227	0.000179107	14.0385	0.777963	3.26396
CNAG_00521	-	hypothetical protein	1754	2021	1355	3967	3453	4184	2.92208e-05	0.663875	7.47317e-06	20.0681	1.58433	4.53431
CNAG_00522	-	C2 domain-containing protein, variant	2289	3816	1614	7681	8146	7036	0.0146745	1.06232	0.00678268	7.32964	2.08828	1.83344
CNAG_00523	-	hypothetical protein, variant	1180	1170	1125	1678	1417	1753	0.811868	-0.033269	0.749678	0.101802	0.977204	0.0905143
CNAG_00524	-	acetyl-CoA acyltransferase 2	1294	1325	1279	2041	2001	2064	0.243889	0.139038	0.16883	1.8933	1.10117	0.612807
CNAG_00525	-	dynein light intermediate chain 1, cytosolic	2466	2488	2303	3393	3306	3729	0.927109	0.0116958	0.897442	0.0166134	1.00814	0.032869
CNAG_00526	-	hypothetical protein	26	13	11	84	95	95	9.71144e-06	1.94786	2.2795e-06	22.3438	3.85801	5.01272
CNAG_00527	-	translation initiation factor eIF-2B subunit epsilon	10733	10151	10391	9598	9887	10482	3.1e-10	-0.570783	3.58e-11	43.8283	0.673251	9.50934
CNAG_00528	WDP5	WD-repeat protein 23	671	756	599	1460	1284	1792	1.43901e-05	0.644288	3.4803e-06	21.5317	1.56297	4.84194
CNAG_00529	-	sulfite transporter	710	428	739	925	893	811	0.956515	-0.0165662	0.934794	0.00669371	0.988583	0.0193083
CNAG_00531	ENA1	potassium/sodium efflux P-type ATPase, fungal- type	3358	4474	2914	12776	12572	12350	4.01e-15	1.30319	2.56e-16	67.1187	2.46775	14.3964
CNAG_00532	-	hypothetical protein	2638	1893	2209	2919	2643	2632	0.170105	-0.223862	0.110956	2.54055	0.85627	0.769282
CNAG_00533	TIM50	mitochondrial import inner membrane translocase subunit tim50	12586	12236	10902	13130	14094	16322	0.0535049	-0.226897	0.0293673	4.74595	0.854471	1.27161
CNAG_00534	-	hypothetical protein	22177	15238	18851	18856	16755	20776	0.000467868	-0.509839	0.000151584	14.3524	0.702301	3.32988
CNAG_00535	-	large subunit ribosomal protein L16	7233	6068	6014	7668	8446	7262	0.137758	-0.226327	0.087028	2.92851	0.854808	0.860884
CNAG_00536	-	hypothetical protein, variant	13659	7962	10169	6866	6381	7735	3.52e-10	-1.11119	4.1e-11	43.5647	0.462913	9.4536
CNAG_00537	-	Carnitine O-acetyltransferase	958	897	1019	1605	1419	1745	0.078221	0.217071	0.0452528	4.00919	1.16237	1.10668
CNAG_00538	HTF1	hypothetical protein	5678	3506	4449	4437	4365	4672	0.00225756	-0.524764	0.000854669	11.1186	0.695073	2.64636
CNAG_00539	-	membrane transporter	627	1829	680	1442	1468	3752	0.510113	0.539902	0.41277	0.670809	1.45387	0.292333
CNAG_00540	-	pantothenate transporter	35	34	30	30	23	48	0.327575	-0.498721	0.238924	1.38693	0.707734	0.48469
CNAG_00541	-	dimethylaniline monooxygenase	416	372	519	686	587	717	0.642861	0.0934352	0.554886	0.348637	1.06691	0.191883
CNAG_00542	-	Salicylate hydroxylase	148	119	144	589	568	656	1.86e-22	1.6296	6.51e-24	101.683	3.09427	21.7307
CNAG_00543	-	hypothetical protein	2507	2446	2316	3597	3626	4011	0.282375	0.117361	0.200228	1.64071	1.08475	0.549174
CNAG_00544	-	hypothetical protein	378	226	305	547	364	624	0.384554	0.234412	0.290633	1.11669	1.17643	0.415043
CNAG_00545	SCC2	cohesin loading factor subunit SCC2	1863	2247	2025	3383	3223	3701	0.0530742	0.236058	0.0290985	4.76178	1.17777	1.27512
CNAG_00546	CHS4	Chitin synthase	1660	1636	1765	6520	5807	5930	1.05e-33	1.34344	1.92e-35	154.373	2.53755	32.9797
CNAG_00547	-	hypothetical protein	7953	9699	8021	11087	10169	10598	0.141236	-0.197753	0.0894961	2.88341	0.871907	0.850055
CNAG_00549	-	hypothetical protein, variant	45	23	70	309	230	574	1.42e-09	2.47473	1.79e-10	40.6856	5.55862	8.84895
CNAG_00550	MSH5	DNA mismatch repair protein Msh5	250	224	418	592	406	626	0.22363	0.344762	0.152414	2.04793	1.26994	0.65047
CNAG_00551	-	poly(A) polymerase	6842	8052	7490	9417	9403	9859	0.206593	-0.151853	0.139024	2.18873	0.900094	0.684884
CNAG_00554	ISC1	inositol phosphorylsphingolipid-phospholipase C	1099	1419	940	1904	1941	2111	0.12742	0.273336	0.0795569	3.07393	1.2086	0.894764
CNAG_00555	-	hypothetical protein, variant	1309	958	1231	2643	2474	2842	1.34512e-06	0.67526	2.7e-07	26.4503	1.59688	5.87124
CNAG_00556	CCK1	Casein kinase I	7212	7047	7158	9392	9138	9921	0.299389	-0.100158	0.214575	1.54029	0.932931	0.523764
CNAG_00557	-	U6 snRNA-associated Sm-like protein LSm8	3899	3255	3327	3221	3107	3552	6.47e-08	-0.596285	1.06e-08	32.7274	0.661455	7.18913
CNAG_00558	-	hypothetical protein	4149	4609	4462	7481	7108	7420	0.0375425	0.226502	0.0196506	5.44267	1.17	1.42548
CNAG_00559	BZP3	bZip transcription factor, putative	1452	2803	1357	1213	1102	1545	3.55359e-05	-1.06102	9.25427e-06	19.6595	0.479293	4.44933
CNAG_00560	-	V-type H -transporting ATPase subunit E	6288	5245	5382	8548	8235	8810	0.486886	0.0886932	0.388353	0.744092	1.06341	0.312573
CNAG_00561	HAT1	histone acetyltransferase type B catalytic subunit	4220	4227	4707	4687	4643	5043	0.000181476	-0.382231	5.4222e-05	16.2945	0.76725	3.74118
CNAG_00562	-	hypothetical protein	3621	3574	3834	4005	3725	3962	2.02019e-05	-0.42488	5.00514e-06	20.8353	0.744901	4.69461
CNAG_00563	-	hypothetical protein	1330	1681	1268	1974	2013	2363	0.753957	0.0558072	0.680721	0.169315	1.03944	0.122653
CNAG_00564	-	hypothetical protein	942	953	1068	1899	2099	1937	0.000295919	0.497205	9.19887e-05	15.2944	1.41148	3.52883
CNAG_00565	VPS1	dynamin GTPase	13573	15103	13973	21234	22958	25311	0.0861032	0.193298	0.050436	3.82691	1.14337	1.06498
CNAG_00566	-	DNA ligase 1	964	1713	1252	1964	2528	2770	0.104422	0.372939	0.0629637	3.45755	1.29499	0.98121
CNAG_00567	RRF2	WD40 repeat protein	3018	2310	2871	3467	3195	3425	0.138179	-0.209491	0.0873284	2.92294	0.864842	0.859557
CNAG_00568	-	hypothetical protein	107	68	75	4630	4724	3946	8.72e-144	5.23313	9.65e-147	665.471	37.6123	143.059
CNAG_00569	-	GTP cyclohydrolase II	5515	5299	5313	6318	6112	6942	0.00546599	-0.246877	0.00224876	9.33452	0.842719	2.26233
CNAG_00570	PKR1	cAMP-dependent protein kinase regulator	8664	7630	8082	11068	10718	11646	0.63584	-0.0537533	0.547262	0.362246	0.963427	0.196652
CNAG_00571	-	hypothetical protein	515	585	753	1003	1067	1105	0.149282	0.267731	0.0954098	2.78064	1.20391	0.825993
CNAG_00572	-	DNA excision repair protein ERCC-2	1403	1552	1631	2947	2976	3027	0.000125647	0.456408	3.62898e-05	17.0562	1.37212	3.90085
CNAG_00573	-	NADH dehydrogenase (ubiquinone) 1 alpha subcomplex 6	6017	5056	4982	7360	7340	7862	0.901849	-0.0180681	0.86435	0.0291861	0.987554	0.0448662
CNAG_00574	-	amino acid/metabolite permease, variant	1606	1660	1878	2635	2331	2807	0.537941	0.082365	0.441174	0.593227	1.05875	0.269265
CNAG_00575	CAT3	Catalase 3	538	1039	463	3178	3381	3478	5.87e-12	1.78797	5.29e-13	52.0958	3.45329	11.2312
CNAG_00576	-	mitochondrial protein	2555	2705	2664	3393	3613	4061	0.820566	-0.0297801	0.76114	0.0924066	0.97957	0.0858866
CNAG_00577	-	hypothetical protein	1380	1138	1297	1868	1775	1998	0.705928	0.0537263	0.626152	0.237314	1.03794	0.151239
CNAG_00580	-	translation initiation factor IF-2	6818	6472	7367	9239	8642	9065	0.27909	-0.125023	0.197587	1.66012	0.91699	0.554256
CNAG_00581	-	saccharopepsin	11798	11003	9981	23103	21856	22285	1.69298e-06	0.529134	3.47e-07	25.9663	1.44306	5.77135
CNAG_00582	-	vacuolar transporter chaperone 1	2525	2161	2189	2059	1889	2184	6.56e-10	-0.676346	7.95e-11	42.2702	0.625748	9.18284
CNAG_00583	-	hypothetical protein	7202	8131	7192	9619	9507	11010	0.432367	-0.0927391	0.334798	0.930252	0.937741	0.364148
CNAG_00584	PFY1	Profilin	17037	12669	14619	20607	16894	19436	0.325421	-0.148907	0.236914	1.39886	0.901933	0.487554
CNAG_00585	-	hypothetical protein	1720	1491	1699	1153	962	1152	2.15e-20	-1.09987	8.52e-22	92.0336	0.46656	19.6671
CNAG_00586	-	hypothetical protein	228	135	224	560	481	588	1.47755e-05	0.960494	3.58806e-06	21.4732	1.94598	4.83046
CNAG_00587	-	hypothetical protein	97	80	107	358	265	330	3.77e-08	1.23388	5.98e-09	33.8398	2.35198	7.42367
CNAG_00588	-	hypothetical protein	53	61	84	99	53	112	0.806762	-0.111882	0.743546	0.107035	0.92538	0.0932543
CNAG_00589	-	5-formyltetrahydrofolate cyclo-ligase	3153	2960	2834	3102	3449	3356	0.00272828	-0.359394	0.00105586	10.727	0.779492	2.56411
CNAG_00590	-	para-aminobenzoate synthetase	9371	7896	8406	5553	5642	6621	5.4e-23	-1.03937	1.83e-24	104.202	0.486539	22.2672
CNAG_00591	-	hypothetical protein	7	14	22	27	17	54	0.392815	0.645148	0.29843	1.0812	1.5639	0.405812
CNAG_00592	-	dolichol-phosphate mannosyltransferase	858	839	1035	1829	1711	2040	7.11515e-05	0.517317	1.95529e-05	18.2324	1.43129	4.14782
CNAG_00593	-	hypothetical protein, variant	2184	1830	2096	2077	1988	2129	2.3179e-05	-0.489247	5.82255e-06	20.5457	0.712397	4.6349
CNAG_00594	-	lipid particle protein	3017	3030	2731	6722	5976	6991	3.16e-11	0.653292	3.22e-12	48.5487	1.57275	10.4997
CNAG_00595	-	hypothetical protein	427	468	468	382	334	472	6.72362e-06	-0.716308	1.53189e-06	23.1075	0.608653	5.1724
CNAG_00596	-	hypothetical protein	499	384	405	628	505	674	0.901849	-0.0265197	0.864181	0.0292597	0.981786	0.0448662
CNAG_00597	DIP5	amino acid transporter, variant	2415	1562	2915	3218	3127	3068	0.82871	-0.055542	0.771038	0.0846913	0.962233	0.0815973
CNAG_00598	-	nicotinamide mononucleotide permease	64	74	67	146	138	162	0.0214773	0.608662	0.0103888	6.56699	1.52484	1.66802
CNAG_00599	-	anion transporter	1492	1250	1551	2763	2749	2659	0.00188468	0.422893	0.000702843	11.4817	1.34061	2.72476
CNAG_00600	CAP60	capsular associated protein	10431	6578	9853	13357	12806	13109	0.847296	0.0415652	0.793747	0.0683549	1.02923	0.0719649
CNAG_00601	CEL1	glycosyl hydrolase	345	247	346	1458	1193	1200	2.89e-17	1.53162	1.46e-18	77.3068	2.8911	16.5392
CNAG_00602	TIF34	translation initiation factor 3 subunit I	4726	4887	5086	4488	4502	5014	4.6e-10	-0.580988	5.46e-11	43.005	0.668506	9.33753
CNAG_00603	-	pre-rRNA-processing protein PNO1	4545	3537	4072	4242	3830	3841	6.50024e-05	-0.535061	1.77592e-05	18.4157	0.69013	4.18707
CNAG_00604	-	hypothetical protein	1022	931	1010	2037	1820	2201	1.74295e-06	0.518812	3.59e-07	25.901	1.43277	5.75872
CNAG_00605	-	cytoplasmic protein	2480	2550	2151	8033	6037	6248	3.62e-11	0.993104	3.71e-12	48.2712	1.99046	10.4408
CNAG_00606	-	transcription initiation factor TFIID subunit 7	1809	2311	2004	2129	2236	2945	0.0975266	-0.262665	0.0581586	3.58913	0.833547	1.01088
CNAG_00607	-	hypothetical protein	2849	2577	3243	2771	2635	2719	1.69555e-06	-0.601408	3.48e-07	25.9611	0.659111	5.77069
CNAG_00608	-	hypothetical protein	5348	4510	4989	3505	3358	3797	3.12e-22	-0.988713	1.12e-23	100.606	0.503927	21.5065
CNAG_00609	-	hypothetical protein	2695	2372	2811	2255	2127	2217	2.82e-11	-0.763742	2.84e-12	48.7931	0.588967	10.5496
CNAG_00612	-	DNA excision repair protein ERCC-3	712	921	728	1303	1339	1651	0.0295396	0.347111	0.0149395	5.92358	1.27201	1.5296
CNAG_00613	FCY1	Cytosine deaminase	2789	2119	2414	1996	1943	2289	6.72e-09	-0.745352	9.46e-10	37.4331	0.596522	8.17265
CNAG_00614	-	hypothetical protein	0	0	0	0	0	0	1		1
CNAG_00615	-	hypothetical protein	414	359	378	628	552	604	0.470805	0.122635	0.37199	0.797008	1.08872	0.327159
CNAG_00619	-	tubulin folding cofactor C	1096	1184	1079	1255	1365	1354	0.043972	-0.265142	0.0234863	5.13217	0.832117	1.35682
CNAG_00622	ARG8	Acetylornithine aminotransferase	9917	10110	8802	9034	10069	10093	2.7567e-05	-0.489394	7.01292e-06	20.1897	0.712324	4.55961
CNAG_00623	EGCrP1	fungus-specific glucosylceramide	1690	1618	1639	2223	2216	2239	0.553513	-0.0747398	0.457409	0.552228	0.949513	0.256872
CNAG_00624	-	hypothetical protein	3507	2979	3318	4040	3810	4326	0.0735127	-0.198258	0.0421661	4.12853	0.871602	1.13364
CNAG_00625	-	ARF guanyl-nucleotide exchange factor	2208	2823	2699	4257	3854	4777	0.11025	0.222417	0.0671421	3.35154	1.16669	0.957623
CNAG_00626	-	hypothetical protein	15312	15910	13243	22707	16970	18571	0.467667	-0.119647	0.368763	0.807828	0.920413	0.330063
CNAG_00627	-	specific transcriptional repressor	29	12	27	139	77	160	9.18342e-06	1.94151	2.13862e-06	22.4663	3.84108	5.037
CNAG_00628	-	hypothetical protein	935	780	1015	1307	1229	1213	0.789777	-0.0486791	0.724133	0.124567	0.966821	0.102495
CNAG_00632	-	hypothetical protein	3548	2806	3434	5110	4669	4763	0.680582	0.0642895	0.596696	0.280008	1.04557	0.16712
CNAG_00633	-	hypothetical protein	6021	5565	5586	6781	6661	6129	0.0112294	-0.315432	0.00503409	7.86715	0.80361	1.94964
CNAG_00634	-	hypothetical protein	2688	2736	2753	4568	4690	5243	0.00117223	0.315238	0.00041568	12.4604	1.24422	2.93099
CNAG_00635	-	cytoplasmic protein	6145	5319	5762	9690	8947	9072	0.13562	0.178844	0.0854276	2.95849	1.13198	0.867675
CNAG_00636	CDC7	CDC7 protein kinase	1510	1616	1753	2545	2321	2500	0.531118	0.0845731	0.434206	0.611546	1.06037	0.274809
CNAG_00637	-	Cystathionine beta-synthase	221	312	318	447	375	620	0.342656	0.236241	0.252036	1.31198	1.17792	0.465141
CNAG_00638	-	GTPase	1757	2820	1883	3338	3789	4466	0.110393	0.328436	0.0672429	3.34907	1.25565	0.957059
CNAG_00639	URO3	hypothetical protein	1928	1390	1412	2259	2454	2544	0.546054	0.109939	0.449573	0.571727	1.07918	0.262764
CNAG_00640	-	small subunit ribosomal protein S4-A	379207	269401	302905	253563	250159	258266	2.06e-09	-0.827439	2.67e-10	39.901	0.563529	8.6854
CNAG_00641	-	transcription elongation factor spt5	8353	8883	8733	9334	9157	10490	8.99759e-05	-0.353765	2.52017e-05	17.7493	0.782539	4.04587
CNAG_00642	-	hypothetical protein	1223	1195	1435	3754	3458	3831	3.2e-18	1.00867	1.46e-19	81.8557	2.01206	17.4948
CNAG_00643	-	hypothetical protein	2270	2795	2596	2419	2505	2690	3.10132e-05	-0.519422	7.97351e-06	19.9442	0.697651	4.50845
CNAG_00644	-	sphingolipid delta-4 desaturase	1538	1305	1382	2154	2118	2067	0.592294	0.0793402	0.497401	0.460477	1.05653	0.227463
CNAG_00645	-	2,5-diamino-6-(ribosylamino)-4(3H)-pyrimidinone 5'-phosphate reductase	1009	684	833	1053	913	941	0.0974582	-0.303963	0.0581026	3.59073	0.810024	1.01118
CNAG_00647	-	hypothetical protein	2158	1434	1941	3623	2856	3678	0.0353847	0.36283	0.0183558	5.56187	1.28595	1.45118
CNAG_00648	-	esterase/lipase	1265	1386	1239	1791	1587	2235	0.955388	0.0102135	0.933069	0.00705335	1.0071	0.01982
CNAG_00649	-	tryptophan synthase, beta subunit	20297	17979	18677	18902	19009	19327	7.12e-07	-0.500134	1.37e-07	27.7585	0.707041	6.1478
CNAG_00650	-	GRAM domain-containing protein	1772	1884	1504	3302	3047	3480	0.000814913	0.418012	0.00027795	13.2134	1.33609	3.08889
CNAG_00651	-	ATP-binding cassette, subfamily D (ALD), peroxisomal long-chain fatty acid import protein	185	277	239	1601	1402	1637	1.35e-39	2.21357	1.96e-41	181.805	4.6382	38.8703
CNAG_00652	-	hypothetical protein, variant 2	679	755	732	1128	1127	1220	0.197118	0.17157	0.131582	2.27374	1.12628	0.705273
CNAG_00653	-	hypothetical protein, variant 2	98	69	109	383	334	385	2.88e-11	1.48657	2.92e-12	48.7437	2.80221	10.5402
CNAG_00654	SRX1	sulfiredoxin	352	464	280	603	652	672	0.173992	0.304571	0.113748	2.50135	1.23505	0.75947
CNAG_00655	-	large subunit acidic ribosomal protein P1	152864	107555	122807	98156	85051	103252	1.48e-11	-0.931955	1.41e-12	50.1672	0.524148	10.8298
CNAG_00656	-	large subunit ribosomal protein L7e	254833	199723	201187	170609	173383	183749	2.27e-11	-0.821629	2.25e-12	49.2553	0.565803	10.6433
CNAG_00657	-	hypothetical protein	0	0	0	0	0	0	1		1
CNAG_00658	-	hypothetical protein	1029	990	1001	1840	1757	1877	0.00139634	0.348704	0.000504935	12.0974	1.27342	2.85501
CNAG_00659	-	TFIIH basal transcription factor complex TTD-A subunit	233	285	304	383	328	423	0.821037	-0.0512995	0.761981	0.0917366	0.965067	0.085637
CNAG_00660	-	histone deacetylase HOS3	1108	1169	979	1493	1272	1381	0.27636	-0.161043	0.195215	1.67781	0.894378	0.558525
CNAG_00661	-	hypothetical protein	1485	1451	1365	2142	2006	2456	0.380358	0.104857	0.286499	1.136	1.07539	0.419808
CNAG_00662	-	carboxymethylenebutenolidase	2441	2085	2503	6977	6988	7587	2.69e-24	1.10684	8.46e-26	110.292	2.15374	23.5709
CNAG_00663	-	hypothetical protein	1848	1655	1555	4598	3709	5152	9.67e-13	0.894752	7.88e-14	55.8352	1.85929	12.0147
CNAG_00664	-	hypothetical protein	30	39	54	239	216	213	3.64e-11	1.9338	3.73e-12	48.2602	3.8206	10.4389
CNAG_00665	-	DNA topoisomerase 2-associated protein PAT1	10252	10090	9614	9972	9986	9876	4.71e-07	-0.512648	8.85e-08	28.6109	0.700935	6.3273
CNAG_00666	-	nucleoporin NSP1	11186	11193	10005	11219	10293	9919	5.11811e-06	-0.548751	1.14533e-06	23.6669	0.683612	5.29089
CNAG_00667	-	hypothetical protein	1816	1934	1949	2012	1934	2174	6.40305e-05	-0.408534	1.74543e-05	18.4487	0.753389	4.19361
CNAG_00668	-	hypothetical protein	5246	5296	5145	11639	10263	10933	2.25e-08	0.556734	3.46e-09	34.9079	1.47094	7.64834
CNAG_00669	-	hypothetical protein	3085	2404	2839	2719	2683	2749	2.71716e-05	-0.538248	6.89898e-06	20.221	0.688607	4.56588
CNAG_00670	FZC12	hypothetical protein, variant	597	639	603	885	785	669	0.429159	-0.155501	0.331578	0.942726	0.897821	0.367382
CNAG_00671	-	cytoplasmic protein	2965	3022	2777	4480	4108	4466	0.583714	0.0649892	0.488044	0.480837	1.04608	0.2338
CNAG_00672	-	small subunit ribosomal protein S11	204250	135496	154018	128924	116284	127224	1.98e-09	-0.91525	2.56e-10	39.9829	0.530252	8.70278
CNAG_00673	-	cytoplasmic protein	5882	5892	5504	7384	7328	8761	0.521942	-0.0713699	0.42478	0.637053	0.951734	0.282378
CNAG_00674	-	hypothetical protein	849	867	735	2223	2322	2676	1.07e-17	1.04644	5.1e-19	79.3884	2.06543	16.9697
CNAG_00675	-	carnitine/acyl carnitine carrier, variant	2975	2504	3164	5074	4613	5401	0.0188716	0.292032	0.00896825	6.82914	1.22436	1.72419
CNAG_00676	VPS28	ESCRT-I complex subunit VPS28	1552	1057	1482	917	703	855	1.09e-12	-1.23649	8.94e-14	55.5863	0.424403	11.9617
CNAG_00677	UHF1	E3 ubiquitin-protein ligase UHRF1	1791	1527	1655	1920	2009	2042	0.0511772	-0.2437	0.0278948	4.83456	0.844577	1.29092
CNAG_00678	URE7	urease accessory protein UreG	6599	6374	6197	9861	10153	12069	0.0244366	0.229662	0.0120696	6.30062	1.17256	1.61196
CNAG_00679	-	hypothetical protein	30	7	26	108	58	85	0.00633978	1.48098	0.0026597	9.02735	2.79139	2.19793
CNAG_00680	NUF2	kinetochore protein Nuf2, variant	2001	1561	2233	2090	1726	2006	0.00139261	-0.504142	0.000503252	12.1036	0.70508	2.85617
CNAG_00681	YCG1	condensin complex subunit 3, variant	2495	2342	2625	3683	3547	3525	0.887335	0.020589	0.845221	0.0381105	1.01437	0.0519123
CNAG_00682	-	kinesin	2796	3825	3017	5286	5368	6445	0.0410299	0.312315	0.0217585	5.265	1.2417	1.3869
CNAG_00683	-	CMGC/CLK protein kinase	1880	1925	1728	2128	1946	2331	0.00546711	-0.301965	0.0022499	9.3336	0.811147	2.26224
CNAG_00684	-	Ribulose-phosphate 3-epimerase	6767	6425	6121	8279	6563	7408	0.0118132	-0.305954	0.00532779	7.76467	0.808907	1.92763
CNAG_00685	-	pre-mRNA-splicing ATP-dependent RNA helicase PRP28	4224	4550	4312	4380	4151	4956	6.92e-07	-0.469846	1.33e-07	27.8199	0.722042	6.1602
CNAG_00686	-	hypothetical protein	15162	16603	10908	42385	35036	32390	2.80529e-06	0.859346	6.03e-07	24.904	1.81422	5.55202
CNAG_00687	-	hypothetical protein, variant	852	961	1032	1341	1276	1223	0.665488	-0.0736261	0.579735	0.306664	0.950247	0.17686
CNAG_00688	-	hypothetical protein	1736	1143	1358	1862	1592	1674	0.213762	-0.231641	0.144795	2.12625	0.851666	0.670069
CNAG_00689	-	beta-1,4-mannosyltransferase	2842	2381	2859	3838	3491	4020	0.88388	-0.0213773	0.840616	0.0404436	0.985292	0.0536065
CNAG_00690	-	hypothetical protein	5481	4747	5221	5274	4996	5626	2.03636e-06	-0.469495	4.26e-07	25.5744	0.722217	5.69115
CNAG_00691	-	hypothetical protein	1006	1060	1008	1883	1843	1948	0.000756515	0.374906	0.000255799	13.3691	1.29675	3.12118
CNAG_00692	-	FAD dependent oxidoreductase	381	482	390	330	313	432	4.62828e-05	-0.739423	1.22237e-05	19.128	0.598979	4.33458
CNAG_00693	CDC4	F-box and WD-40 domain-containing protein CDC4, variant	1764	1857	1774	2888	2774	3030	0.0933852	0.177735	0.0552412	3.67479	1.13111	1.02972
CNAG_00694	CLF1	pre-mRNA-splicing factor CLF1	10215	9625	9985	9781	9706	11857	2.66779e-06	-0.442365	5.71e-07	25.0075	0.735927	5.57385
CNAG_00695	-	hypothetical protein	1317	1160	1301	1674	1596	1876	0.613459	-0.0663899	0.521964	0.410011	0.955025	0.212215
CNAG_00696	-	alpha-mannosidase	860	999	808	1708	1701	1877	0.00029663	0.475845	9.22753e-05	15.2885	1.39073	3.52778
CNAG_00697	UGE1	UDP-glucose 4-epimerase	9344	8898	8212	10276	11059	11449	0.0798656	-0.198936	0.0463305	3.96954	0.871193	1.09764
CNAG_00698	-	hypothetical protein	2868	2385	2840	3982	3640	4290	0.740589	0.0457168	0.665283	0.18717	1.0322	0.130423
CNAG_00699	LPI15	transmembrane receptor	714	676	767	2784	2142	2760	5.99e-25	1.31873	1.78e-26	113.386	2.49447	24.2223
CNAG_00700	ADE16	phosphoribosylaminoimidazolecarboxamide formyltransferase/IMP cyclohydrolase	30735	23730	27283	24252	23384	23144	1.54e-08	-0.713638	2.3e-09	35.699	0.60978	7.81135
CNAG_00701	CAS31	protein involved in gxm O-acetylation	6721	6266	7210	11193	11124	12306	0.00902062	0.267107	0.00394742	8.30784	1.20339	2.04476
CNAG_00702	-	hypothetical protein	6127	3781	5114	13275	12246	13981	7.72e-08	0.884981	1.28e-08	32.3591	1.84674	7.11235
CNAG_00703	-	large subunit ribosomal protein L31e	108451	75283	86071	76589	73992	80316	1.92e-07	-0.733258	3.38e-08	30.4746	0.601544	6.71705
CNAG_00704	-	hypothetical protein, variant	1818	2286	1878	3217	3093	3394	0.182415	0.186905	0.12022	2.41446	1.13832	0.738939
CNAG_00705	-	RuvB-like helicase 2	7081	6575	6780	6350	6231	7178	1.85e-10	-0.560418	2.08e-11	44.8966	0.678106	9.73274
CNAG_00706	-	RNA-binding protein rnp24	3236	2802	3464	2872	2484	2603	2.46e-09	-0.763564	3.22e-10	39.5363	0.58904	8.60963
CNAG_00707	-	protein sym1	3122	2365	2828	3723	3435	3144	0.243919	-0.194032	0.168881	1.89285	0.874159	0.612754
CNAG_00708	-	pre-mRNA-splicing factor slt11	3500	3336	3768	5078	4858	5436	0.841308	0.0248842	0.786587	0.0733032	1.0174	0.0750448
CNAG_00709	-	uracil-DNA glycosylase	2049	1514	1722	2900	2327	2737	0.638566	0.0807896	0.550315	0.356754	1.0576	0.194794
CNAG_00710	-	Glutamine synthetase	1950	1922	1700	3035	3207	3587	0.00898082	0.307577	0.00392559	8.31792	1.23763	2.04668
CNAG_00711	-	hypothetical protein	1063	683	1097	2039	1284	1655	0.207966	0.296007	0.140127	2.17657	1.22774	0.682008
CNAG_00712	-	hypothetical protein	1285	1361	1419	1691	1466	1822	0.063071	-0.221572	0.0353936	4.42609	0.85763	1.20017
CNAG_00713	-	V-type H -transporting ATPase 54 kDa subunit	2967	3369	3035	3658	3683	4249	0.0711044	-0.206044	0.0405574	4.19441	0.866911	1.1481
CNAG_00714	-	hypothetical protein	1154	979	1182	1331	1272	1518	0.13859	-0.198655	0.0876563	2.9169	0.871363	0.858267
CNAG_00715	-	hypothetical protein	6006	3842	4641	4472	3845	4799	6.39675e-05	-0.656321	1.74292e-05	18.4514	0.634494	4.19404
CNAG_00716	-	Cytochrome c	65172	51460	54682	57245	58949	62445	0.00018128	-0.448016	5.41188e-05	16.2981	0.73305	3.74165
CNAG_00717	-	hypothetical protein	741	1110	657	1384	1353	1692	0.161655	0.304082	0.104689	2.63261	1.23463	0.79141
CNAG_00718	CAC2	chromatin assembly factor 1 subunit B	2142	2148	2315	2821	2706	3093	0.240972	-0.127588	0.166343	1.9156	0.91536	0.618033
CNAG_00719	-	ribosome biogenesis ATPase	9186	6983	7428	6893	5755	6290	1.15e-09	-0.825879	1.43e-10	41.1227	0.564139	8.93883
CNAG_00720	-	DNA repair protein RAD51	2112	1475	2288	3007	2238	3017	0.921221	-0.023074	0.890072	0.0191028	0.984134	0.0356361
CNAG_00721	CAP59	alpha-1,3-mannosyltransferase	7203	5500	6700	9033	8942	9216	0.901399	-0.0204515	0.863494	0.0295592	0.985924	0.045083
CNAG_00722	-	large subunit ribosomal protein L27	5479	4935	5295	4806	4980	5452	1.44e-08	-0.554085	2.14e-09	35.8409	0.681089	7.84048
CNAG_00723	-	hypothetical protein	205	192	223	282	299	435	0.414343	0.192484	0.318157	0.996506	1.14273	0.38264
CNAG_00726	-	hypothetical protein	10	2	7	9	8	10	0.998901	-0.00381215	0.99622	2.24432e-05	0.997361	0.000477371
CNAG_00727	-	mitochondrial protein with role in iron accumulation	1317	1831	1071	1572	1543	1806	0.161404	-0.291732	0.104471	2.63593	0.816921	0.792085
CNAG_00728	-	dityrosine transporter	223	211	287	508	366	580	0.0236526	0.491228	0.0116242	6.36731	1.40564	1.62612
CNAG_00729	RRM3	hypothetical protein	0	0	0	0	0	0	1		1
CNAG_00730	AFR1	ATP-binding cassette transporter	30718	24727	23330	29388	28004	27535	0.00423715	-0.397109	0.00170517	9.84259	0.759379	2.37293
CNAG_00732	CCD3	hypothetical protein	1592	2405	1329	2163	2385	2136	0.472885	-0.177512	0.374331	0.789238	0.884227	0.325245
CNAG_00733	-	hypothetical protein	4752	3707	4926	6532	6289	6168	0.99695	-0.00110575	0.993247	7.16276e-05	0.999234	0.0013267
CNAG_00734	-	dihydroorotase, homodimeric type, variant	2006	1754	1738	1771	1864	1942	3.52444e-05	-0.48789	9.17403e-06	19.6761	0.713067	4.45291
CNAG_00735	-	aldehyde dehydrogenase family 7 member A1	1857	1482	1790	1528	1423	1887	8.65296e-06	-0.600231	2.00445e-06	22.5908	0.659648	5.06284
CNAG_00736	SEC5	exocyst protein	1555	1631	1710	3000	2711	3106	0.00136373	0.337018	0.000491276	12.1485	1.26314	2.86527
CNAG_00737	-	hypothetical protein	2308	2641	2052	1932	1952	2152	2.18e-08	-0.725078	3.34e-09	34.9742	0.604964	7.66161
CNAG_00738	-	hypothetical protein	77	54	126	359	261	319	1.33343e-05	1.35747	3.20857e-06	21.6876	2.56235	4.87503
CNAG_00739	-	hypothetical protein	2546	2599	2926	4505	4314	5276	0.00972487	0.29021	0.00429387	8.15517	1.22282	2.01212
CNAG_00740	SNF5	swi/snf chromatin-remodeling complex subunit	4538	5522	4547	5875	5363	6048	0.033386	-0.268719	0.0171917	5.67669	0.830056	1.47644
CNAG_00741	-	ATP-dependent RNA helicase SUB2	32151	25861	27743	27212	25796	26564	1.17e-07	-0.615177	1.99e-08	31.5006	0.65285	6.93122
CNAG_00742	-	Serine palmitoyltransferase	4375	3535	3961	6553	5537	6027	0.48157	0.10116	0.382686	0.762056	1.07264	0.317341
CNAG_00743	-	imidazoleglycerol phosphate synthase, cyclase subunit	14326	12196	11370	10671	10510	10447	3.83e-10	-0.767002	4.5e-11	43.3849	0.587637	9.41688
CNAG_00744	OCH1	alpha 1,6-mannosyltransferase	1754	1656	1748	2742	2715	2830	0.11149	0.175492	0.0680896	3.32848	1.12935	0.952762
CNAG_00745	HRK1	HAL protein kinase	4156	4513	3569	5863	5844	6655	0.609564	0.0733701	0.517077	0.41972	1.05217	0.21498
CNAG_00746	CAS35	capsular associated protein	10320	8281	9258	12417	11247	12076	0.244423	-0.149116	0.16929	1.88922	0.901803	0.611858
CNAG_00747	-	succinyl-CoA synthetase beta subunit	31834	24631	22299	34774	33738	36553	0.579865	-0.093163	0.483898	0.490065	0.937465	0.236673
CNAG_00748	-	hypothetical protein	776	687	705	783	945	932	0.182812	-0.212142	0.120571	2.40989	0.863254	0.737995
CNAG_00749	NBT2	alternative sulfate transporter	0	0	0	0	0	0	1		1
CNAG_00750	-	hypothetical protein	4295	2717	4153	2191	2082	2573	1.83e-12	-1.21865	1.54e-13	54.512	0.429686	11.7365
CNAG_00751	-	hypothetical protein	7	8	10	43	38	46	0.0010876	1.83153	0.000383528	12.6108	3.55914	2.96353
CNAG_00752	WDP12	transducin family protein	1065	1464	1130	577	816	928	4.23e-09	-1.17087	5.76e-10	38.4013	0.444154	8.37352
CNAG_00753	-	hypothetical protein	1770	2046	1920	3050	3317	3572	0.0221137	0.282461	0.0107455	6.50692	1.21627	1.65534
CNAG_00754	-	ATP-binding cassette, sub-family E, member 1	21322	19720	20603	18294	18630	18634	1.63e-11	-0.656958	1.56e-12	49.9699	0.634214	10.7889
CNAG_00755	-	hypothetical protein	621	706	787	977	877	991	0.621422	-0.0829906	0.530803	0.392854	0.944099	0.206613
CNAG_00756	-	hypothetical protein	1234	956	842	1090	1007	1186	0.0183013	-0.39684	0.00866796	6.88999	0.75952	1.73752
CNAG_00757	DOA4	ubiquitin carboxyl-terminal hydrolase 8	2167	2742	1995	2552	2659	2953	0.0855831	-0.269986	0.0500471	3.83988	0.829328	1.06761
CNAG_00758	-	regulatory protein Ral2	1670	1911	2355	1125	1244	1382	5.33e-14	-1.17399	3.83e-15	61.7851	0.443194	13.2729
CNAG_00759	-	hypothetical protein	42	30	35	152	147	179	1.6e-08	1.64638	2.4e-09	35.6177	3.13047	7.795
CNAG_00760	-	methylenetetrahydrofolate reductase	3431	3309	3012	4916	4596	4755	0.760712	0.0408785	0.689056	0.160109	1.02874	0.11878
CNAG_00761	-	coiled-coil domain-containing protein 12	2840	2283	2551	3080	2495	3619	0.0773055	-0.25766	0.0446553	4.03161	0.836443	1.11179
CNAG_00762	DPH1	diphthamide biosynthesis protein 1	2153	2121	2140	2178	2060	1909	6.98371e-06	-0.566038	1.59544e-06	23.0294	0.675469	5.15591
CNAG_00764	-	ATP-dependent RNA helicase DBP4	6088	5483	5530	6163	5189	5337	7.19917e-06	-0.542398	1.64998e-06	22.9648	0.686629	5.14272
CNAG_00765	-	hypothetical protein	1439	1407	1536	2793	3001	3564	5.64e-07	0.58111	1.07e-07	28.2382	1.496	6.24877
CNAG_00766	-	hypothetical protein	385	597	317	1286	1171	1305	4.51542e-06	1.02202	1.00324e-06	23.9219	2.03076	5.3453
CNAG_00768	-	hypothetical protein	2813	2651	2144	5405	4798	5817	1.66351e-05	0.561166	4.08668e-06	21.2238	1.47546	4.77897
CNAG_00769	PBS2	STE/STE7 protein kinase	2898	2724	2608	5998	5279	5904	4.93e-08	0.551513	7.94e-09	33.2886	1.46562	7.30694
CNAG_00770	MSH2	DNA mismatch repair protein Msh2	2374	2205	2866	2937	2590	3009	0.0214218	-0.314397	0.0103461	6.57431	0.804187	1.66914
CNAG_00771	-	large subunit ribosomal protein L29	107909	76303	88027	75409	73435	79216	1.97e-08	-0.763938	3e-09	35.1856	0.588887	7.70504
CNAG_00772	RAD23	UV excision repair protein Rad23	8329	7304	7213	7541	7546	7643	2.24471e-06	-0.514519	4.74e-07	25.3673	0.700026	5.64884
CNAG_00773	-	hypothetical protein	454	536	463	799	777	1025	0.0404327	0.322959	0.021412	5.29294	1.25089	1.39327
CNAG_00774	-	phosphoglycerate dehydrogenase	15929	14980	14301	14353	14159	14124	8.63e-09	-0.591389	1.23e-09	36.9209	0.663703	8.06385
CNAG_00775	UTP15	U3 small nucleolar RNA-associated protein 15	4056	3392	3868	3833	3463	3541	2.17156e-06	-0.569497	4.57e-07	25.4357	0.673852	5.66323
CNAG_00776	MP88	immunoreactive mannoprotein MP88	42984	33212	35430	79389	72657	71925	0.000196919	0.499048	5.91751e-05	16.1289	1.41328	3.70571
CNAG_00777	-	CCR4-NOT transcriptional complex subunit CAF120	4879	5234	4370	7789	7077	7639	0.321665	0.126194	0.233744	1.41793	1.09141	0.492596
CNAG_00778	-	hypothetical protein	2202	2419	2194	3914	3324	3936	0.0821412	0.200737	0.0478425	3.91551	1.14929	1.08544
CNAG_00779	RPL27	large subunit ribosomal protein L27e	117168	87014	89359	82751	79703	83866	1.5e-08	-0.760711	2.24e-09	35.7558	0.590205	7.82293
CNAG_00780	-	hypothetical protein	980	1129	1054	1837	1529	1769	0.169374	0.187178	0.110417	2.54824	1.13853	0.771153
CNAG_00781	-	U6 snRNA-associated Sm-like protein LSm3	3766	2670	2957	1923	1838	2319	5.69e-15	-1.14145	3.68e-16	66.4017	0.453304	14.2451
CNAG_00782	SPS1	STE/STE20/Fray protein kinase	1070	874	1142	1585	1450	2093	0.208575	0.213564	0.140768	2.16954	1.15955	0.680738
CNAG_00783	-	hypothetical protein	1542	1483	1417	1821	1421	1953	0.0266034	-0.290729	0.0132707	6.13267	0.817489	1.57506
CNAG_00784	-	hypothetical protein	31	19	24	19	19	21	0.136286	-0.836518	0.0858804	2.94995	0.559993	0.865549
CNAG_00785	-	ATP-dependent RNA helicase eIF4A	132078	101652	113134	100586	103827	99826	7.32e-08	-0.694114	1.21e-08	32.4735	0.618089	7.13566
CNAG_00786	-	hypothetical protein	2184	1459	1891	2056	2165	2369	0.131716	-0.257288	0.082707	3.01089	0.836659	0.880362
CNAG_00787	-	hypothetical protein	1772	2133	1585	2950	2659	3049	0.356222	0.145098	0.264067	1.24731	1.10581	0.44828
CNAG_00788	NDH1	NADH dehydrogenase	60778	44515	50572	39071	38425	38975	2.38e-12	-0.926814	2.03e-13	53.9739	0.526019	11.6232
CNAG_00789	-	hypothetical protein	0	0	1	2	1	3	0.504623	1.94479	0.407334	0.686567	3.84982	0.297033
CNAG_00790	DPP1	PAP2 domain-containing protein	2011	2440	1866	2975	3049	3658	0.528476	0.101703	0.431592	0.618536	1.07304	0.276975
CNAG_00791	HLH1	hypothetical protein	1496	1449	1182	2421	2339	2778	0.00735741	0.356188	0.00314452	8.72166	1.28004	2.13328
CNAG_00792	-	ATP-binding cassette transporter	3110	3172	3257	5391	5181	5674	0.00640118	0.257875	0.00268703	9.00866	1.19572	2.19374
CNAG_00793	-	DNA-directed RNA polymerase I, II, and III subunit RPABC1	7833	5257	6612	6280	5946	6727	0.000163222	-0.565841	4.8206e-05	16.5174	0.675562	3.78722
CNAG_00794	-	hypothetical protein	1900	1741	1741	3153	3125	3716	0.000265592	0.380002	8.18035e-05	15.5161	1.30134	3.57579
CNAG_00795	CFL1	Putative flocculin	0	0	0	7	1	3	0.125937	3.79721	0.0784764	3.09618	13.9019	0.899847
CNAG_00796	MDR1	ATP-binding cassette, subfamily B (MDR/TAP), member 1	2236	2283	2150	5666	5058	4892	3.22e-09	0.721645	4.29e-10	38.9755	1.64906	8.49257
CNAG_00797	ACS1	acetyl-CoA synthetase	22941	18870	19818	17254	17593	18143	6.54e-11	-0.725492	6.95e-12	47.0417	0.604791	10.1843
CNAG_00798	-	hypothetical protein	24	34	30	141	127	136	1.13e-07	1.68864	1.93e-08	31.5682	3.22352	6.94538
CNAG_00799	-	cellulase	43540	36999	36008	78468	77608	68385	0.00151989	0.443326	0.000556152	11.9173	1.35974	2.81819
CNAG_00800	-	nicotinamidase	409	326	355	841	686	719	0.00160343	0.535424	0.000589088	11.8101	1.44937	2.79495
CNAG_00801	-	hypothetical protein	98	93	85	212	208	245	0.00066741	0.756136	0.000223537	13.6221	1.68896	3.17561
CNAG_00802	CBP1	calcineurin-binding protein	375	536	383	575	607	792	0.696961	0.0913997	0.616065	0.251438	1.0654	0.156791
CNAG_00803	-	solute carrier family 24 (sodium/potassium/calcium exchanger), member 6	1721	1975	1529	2911	3165	3340	0.0160361	0.339849	0.00748469	7.1528	1.26562	1.7949
CNAG_00804	-	Gtr1/RagA G protein Gtr1	2377	2233	2159	4749	4772	5427	7.4e-11	0.631438	7.91e-12	46.7882	1.54911	10.131
CNAG_00805	-	hypothetical protein	1489	1168	1274	2188	1984	2265	0.142278	0.200888	0.0902162	2.87051	1.14941	0.846862
CNAG_00806	-	hypothetical protein	12793	10597	10313	13295	10557	13624	0.0056211	-0.361174	0.00231949	9.27779	0.778531	2.25018
CNAG_00807	-	hypothetical protein	930	2008	857	1518	2011	2319	0.85527	0.107598	0.803216	0.0620944	1.07743	0.0678967
CNAG_00808	-	myosin regulatory light chain cdc4	9282	5802	6693	8500	7645	8457	0.0617261	-0.332608	0.0345706	4.46626	0.7941	1.20953
CNAG_00809	-	ATP-dependent RNA helicase DED1	23408	19384	21477	29252	26847	25386	0.253374	-0.161954	0.176673	1.82539	0.893814	0.596238
CNAG_00810	HAD4/SSU72	polynucleotide kinase 3'-phosphatase	2396	2355	2467	1860	2009	2083	1.05e-13	-0.787057	7.88e-15	60.3661	0.579525	12.9774
CNAG_00811	-	anthranilate phosphoribosyltransferase	5808	5446	4999	7594	7089	7450	0.619555	-0.0629303	0.529054	0.396209	0.957318	0.20792
CNAG_00812	IRR1	cohesin complex subunit SA-1/2	3542	3542	3820	3987	3771	3970	7.2287e-05	-0.403761	1.99094e-05	18.1979	0.755885	4.14094
CNAG_00813	-	hypothetical protein	19	81	65	25	42	93	0.386786	-0.587287	0.292479	1.10818	0.665593	0.41253
CNAG_00814	-	hypothetical protein	272	459	312	585	585	975	0.0494242	0.51288	0.0267813	4.90485	1.4269	1.30606
CNAG_00815	SIT1	MFS transporter, SIT family, siderophore-iron:H symporter	2708	2418	3716	2926	3225	4121	0.119206	-0.299932	0.0736958	3.19872	0.812291	0.923702
CNAG_00816	ATG8	microtubule binding protein	3632	3201	2923	7309	6357	8053	5.04e-08	0.640251	8.15e-09	33.2396	1.5586	7.29733
CNAG_00817	-	hypothetical protein	897	1010	760	1020	860	947	0.00724758	-0.426241	0.00309134	8.75276	0.744199	2.13981
CNAG_00818	-	hypothetical protein	1008	755	1023	2412	1851	2111	2.75874e-05	0.684275	7.02489e-06	20.1864	1.60689	4.55929
CNAG_00819	-	small subunit ribosomal protein S30	46459	27133	34475	27202	24819	27802	7.78e-08	-0.945925	1.29e-08	32.3423	0.519097	7.10891
CNAG_00820	-	Prephenate dehydratase	2241	1851	2073	2073	2129	2387	0.000466887	-0.414747	0.000151151	14.3578	0.750151	3.33079
CNAG_00821	-	large subunit ribosomal protein L34e	70248	48557	51895	50969	49570	46722	5.85409e-06	-0.716776	1.32082e-06	23.3926	0.608456	5.23254
CNAG_00822	SQT1	ribosome assembly protein SQT1	15692	12511	14037	11208	10322	11134	7.77e-15	-0.879622	5.12e-16	65.7492	0.54351	14.1096
CNAG_00823	-	cadmium ion transporter	305	409	517	913	726	1057	0.00473092	0.611104	0.00192254	9.62206	1.52743	2.32505
CNAG_00824	-	ubiquitin-conjugating enzyme E2 2	1492	1589	1656	2003	2052	2189	0.372713	-0.111352	0.279409	1.16996	0.92572	0.428625
CNAG_00825	-	solute carrier family 25 (mitochondrial folate transporter), member 32	2144	1878	1993	2107	2187	2315	0.000849942	-0.373116	0.000291047	13.1271	0.772113	3.07061
CNAG_00826	DAK101	dihydroxyacetone kinase	78	42	60	294	171	240	3.97171e-06	1.45584	8.73e-07	24.19	2.74316	5.40102
CNAG_00827	-	ribose 5-phosphate isomerase	20	12	8	364	162	305	2.27e-20	3.8556	9.1e-22	91.9035	14.4761	19.6439
CNAG_00828	SIP401	pathway-specific nitrogen regulator	313	372	277	1539	1465	1401	8.58e-26	1.68882	2.39e-27	117.359	3.22393	25.0665
CNAG_00829	-	E3 ubiquitin ligase complex SCF subunit sconC	7705	6262	7071	7524	7300	7592	0.000310215	-0.416219	9.69589e-05	15.195	0.749386	3.50834
CNAG_00830	FZC38	hypothetical protein	826	1110	796	1395	1283	1509	0.588434	0.102514	0.493002	0.469968	1.07364	0.230303
CNAG_00831	-	nucleoside-diphosphate-sugar epimerase	2508	2005	2286	4564	4081	4229	0.0013456	0.41374	0.00048427	12.1753	1.33213	2.87108
CNAG_00832	-	D-lactate dehydrogenase	486	493	558	701	660	782	0.84672	-0.0333013	0.792999	0.0688632	0.977182	0.0722604
CNAG_00833	-	hypothetical protein	29	22	29	107	116	78	0.000289248	1.41584	8.96943e-05	15.3421	2.66814	3.53873
CNAG_00834	-	phosphatidylserine decarboxylase, variant	475	1606	437	3692	5080	4179	0.0105093	1.85731	0.00468415	7.99752	3.62331	1.97843
CNAG_00835	-	hypothetical protein	893	884	972	1051	1089	1274	0.126452	-0.200226	0.0788284	3.08889	0.870414	0.898074
CNAG_00836	-	2-hydroxyacid dehydrogenase	1336	1106	1416	1332	1244	1385	0.000443745	-0.472151	0.000142895	14.4636	0.720889	3.35287
CNAG_00837	-	hypothetical protein	1137	1065	1302	1726	1681	1970	0.459811	0.105349	0.361551	0.832499	1.07575	0.33742
CNAG_00838	-	hypothetical protein	354	317	430	316	336	350	0.000450339	-0.644892	0.000145296	14.4322	0.639541	3.34646
CNAG_00839	-	mitochondrial protein	421	446	370	608	657	687	0.389562	0.14868	0.295057	1.0964	1.10856	0.409424
CNAG_00840	-	hypothetical protein	103	132	117	1447	1476	1584	8.07e-96	3.16824	2.08e-98	443.288	8.98953	95.0931
CNAG_00841	-	hypothetical protein	971	1007	920	1007	1017	1204	0.00336364	-0.357582	0.00132718	10.3043	0.780472	2.47319
CNAG_00843	-	Salicylate hydroxylase	131	151	183	369	410	522	4.55775e-06	0.967893	1.01377e-06	23.9018	1.95598	5.34125
CNAG_00844	-	hypothetical protein	9	2	5	82	32	56	2.18305e-05	2.8933	5.44621e-06	20.6736	7.42967	4.66094
CNAG_00845	-	hypothetical protein	5089	4493	5240	4270	3904	4407	3.67e-13	-0.747158	2.88e-14	57.8116	0.595776	12.4358
CNAG_00846	-	hypothetical protein	1481	1232	1667	1486	1217	1708	0.0010876	-0.507197	0.000383417	12.6113	0.703588	2.96353
CNAG_00847	-	hypothetical protein	1095	1188	983	1421	1409	1410	0.380358	-0.13113	0.286543	1.13579	0.913116	0.419808
CNAG_00848	-	hypothetical protein, variant 2	1367	2839	1337	7841	7994	6163	0.00170761	1.48741	0.000631351	11.6812	2.80384	2.76761
CNAG_00849	-	hypothetical protein	172	180	257	383	368	368	0.107583	0.370057	0.0651741	3.40057	1.2924	0.968257
CNAG_00850	-	plant-inducible protein	354	431	311	488	531	712	0.531762	0.140932	0.435125	0.609105	1.10262	0.274283
CNAG_00851	-	hypothetical protein	71	191	64	119	162	195	0.962985	0.0276524	0.943804	0.00496883	1.01935	0.0163804
CNAG_00852	-	hypothetical protein	3121	2845	2766	4541	3982	4088	0.880386	0.0229315	0.834813	0.043486	1.01602	0.0553271
CNAG_00853	-	exosome complex component RRP43	2991	2450	2588	2699	2522	2839	1.0864e-05	-0.504818	2.57674e-06	22.1084	0.704749	4.96401
CNAG_00854	ERG2	C-8 sterol isomerase	6926	6114	6705	5940	5787	6131	2.7e-11	-0.653636	2.72e-12	48.8818	0.635676	10.5687
CNAG_00855	-	ligase	1226	1367	953	1675	1653	1932	0.770005	0.0559451	0.69985	0.148628	1.03954	0.113506
CNAG_00858	-	hypothetical protein	1316	1164	1559	3388	3029	4045	1.04e-09	0.856573	1.28e-10	41.3403	1.81073	8.98503
CNAG_00859	-	hypothetical protein	897	827	1023	4811	4486	4775	6.24e-54	1.84799	5e-56	248.694	3.59997	53.2047
CNAG_00860	-	hypothetical protein	1068	968	1154	2589	2499	3345	6.02e-12	0.88544	5.44e-13	52.0381	1.84733	11.2202
CNAG_00861	-	3-hydroxyacyl-CoA dehydrogenase	626	542	480	477	435	451	1.27871e-06	-0.781956	2.56e-07	26.554	0.581578	5.89323
CNAG_00862	-	hypothetical protein	1853	1418	1533	3088	3064	2911	0.00487998	0.411148	0.00199028	9.55848	1.32974	2.31158
CNAG_00863	-	Flavin-containing monooxygenase	621	514	694	1749	1476	1525	3.48e-08	0.869557	5.47e-09	34.0135	1.8271	7.45873
CNAG_00864	ITR2	myo-inositol transporter, putative	37	52	37	83	104	83	0.113925	0.597051	0.0697725	3.28836	1.51262	0.943381
CNAG_00865	CAS92	maltose O-acetyltransferase	0	1	0	1	2	0	0.792841	1.02841	0.727818	0.121124	2.03977	0.100814
CNAG_00866	-	transketolase, variant	2351	2513	2098	6664	5312	4767	4.46954e-06	0.762703	9.92e-07	23.9426	1.69667	5.34974
CNAG_00867	ITR3A	myo-inositol transporter, putative	43	24	37	140	76	79	0.0210903	0.998919	0.0101627	6.60616	1.9985	1.67592
CNAG_00868	-	hypothetical protein	0	0	0	0	0	0	1		1
CNAG_00869	PDR5/AFR2	ATP-binding cassette transporter	3005	2365	2135	5138	5480	4060	0.0156871	0.471211	0.00730249	7.19701	1.38627	1.80446
CNAG_00870	-	hypothetical protein, variant 2	18	13	8	332	224	261	3.63e-29	3.87871	8.47e-31	133.129	14.7098	28.4406
CNAG_00871	CLR3	hypothetical protein, variant	176	168	245	950	834	1017	2.97e-22	1.7362	1.07e-23	100.704	3.33156	21.5266
CNAG_00872	-	ATP-dependent DNA helicase	2705	3220	2903	4016	3975	4623	0.992313	0.0018479	0.98609	0.000303946	1.00128	0.00335137
CNAG_00873	-	hypothetical protein	302	359	303	342	245	365	0.00646849	-0.536874	0.00271926	8.98687	0.689263	2.1892
CNAG_00874	-	multisite-specific tRNA:(cytosine-C5)- methyltransferase	13987	11355	12042	11361	10813	11005	6.03e-09	-0.679035	8.39e-10	37.6675	0.624583	8.2195
CNAG_00875	-	rab family protein	1708	1949	1779	2083	1925	2476	0.0325898	-0.261651	0.0167257	5.72493	0.834133	1.48692
CNAG_00876	FRE7	ferric-chelate reductase	4113	2766	6028	5402	4023	8044	0.862518	-0.0929254	0.81172	0.0567431	0.93762	0.0642316
CNAG_00877	-	adenylate kinase, variant	1497	1639	1494	1845	1735	2389	0.284762	-0.1519	0.202306	1.62565	0.900064	0.545519
CNAG_00878	-	hypothetical protein	364	322	491	407	323	452	0.0163725	-0.510895	0.00765177	7.11322	0.701787	1.78589
CNAG_00879	-	Glutamate dehydrogenase	17684	19772	15702	30877	33098	35793	0.00142529	0.397759	0.000516726	12.0543	1.31746	2.8461
CNAG_00883	ECM2201	Putative Zn2-Cys6 zinc-finger transcription factor	323	445	312	395	361	490	0.144581	-0.311847	0.091943	2.84002	0.80561	0.839889
CNAG_00884	-	exocyst complex component protein	1968	2593	2177	2912	3330	3328	0.992382	-0.0023473	0.986285	0.000295485	0.998374	0.00332123
CNAG_00885	-	hypothetical protein	0	0	0	2	1	0	0.597383	1.9694	0.503291	0.447989	3.91605	0.223747
CNAG_00886	SAH1	Adenosylhomocysteinase	64960	44550	47904	58385	54258	50029	0.00716181	-0.455418	0.00305123	8.77658	0.729299	2.14498
CNAG_00887	-	hypothetical protein	3	5	8	13	28	34	0.0368271	1.71119	0.0192128	5.48204	3.27431	1.43383
CNAG_00888	CNB1	calcineurin subunit B	3203	2273	2215	2661	2282	2780	0.00189689	-0.506094	0.000707866	11.4685	0.704126	2.72196
CNAG_00889	-	hypothetical protein, variant	96	65	62	151	132	186	0.0633653	0.555848	0.0356021	4.41606	1.47003	1.19815
CNAG_00890	-	hypothetical protein	3875	3636	3774	5256	5317	5075	0.806762	-0.0339265	0.743773	0.106838	0.976758	0.0932543
CNAG_00891	-	ATP-binding cassette, subfamily F, member 2	32637	26860	28852	37036	35502	34484	0.0733182	-0.228718	0.0420185	4.13446	0.853393	1.13479
CNAG_00892	-	hypothetical protein	776	604	626	889	961	1292	0.503749	0.130187	0.406505	0.688999	1.09444	0.297786
CNAG_00893	-	hypothetical protein, variant	778	866	748	1918	1710	2014	8.77e-10	0.725316	1.07e-10	41.6827	1.65326	9.05676
CNAG_00894	-	hypothetical protein	20142	14328	15527	15537	14746	15941	9.94834e-06	-0.621648	2.34489e-06	22.2895	0.649928	5.00225
CNAG_00895	ZIP1	solute carrier family 39 (zinc transporter), member 1/2/3	5819	5187	6637	7598	6301	7886	0.121153	-0.209569	0.0749886	3.1703	0.864796	0.916667
CNAG_00896	FZC34	transcription factor	363	536	488	447	424	604	0.0383046	-0.431556	0.0201248	5.40104	0.741462	1.41675
CNAG_00897	SKN1	putative glucosidase	9342	10359	10744	20883	20524	21293	4.11e-07	0.533519	7.66e-08	28.8907	1.44746	6.38605
CNAG_00898	-	multidrug efflux pump	2	0	0	8	10	13	0.0256997	3.44054	0.0127693	6.2008	10.8569	1.59007
CNAG_00899	-	hypothetical protein	4061	3484	3684	3084	2699	2671	2.65e-13	-0.915536	2.06e-14	58.4711	0.530147	12.576
CNAG_00900	-	hypothetical protein	202	238	261	482	417	559	0.0031557	0.539721	0.00123931	10.4308	1.45369	2.5009
CNAG_00901	-	hypothetical protein	328	477	369	534	529	670	0.848488	0.0453839	0.794988	0.0675163	1.03196	0.0713541
CNAG_00902	-	hypothetical protein	2322	1782	1908	1827	1744	1936	1.11619e-06	-0.636353	2.22e-07	26.8321	0.643337	5.95226
CNAG_00903	-	hypothetical protein, variant 2	527	469	580	845	703	1155	0.188394	0.255164	0.124846	2.35545	1.19347	0.724933
CNAG_00904	-	aflatoxin efflux pump AFLT	723	655	703	506	501	560	4.18e-13	-0.920147	3.31e-14	57.5436	0.528455	12.3787
CNAG_00905	-	MFS transporter	61	66	96	299	213	267	1.45691e-06	1.2912	2.95e-07	26.2796	2.44731	5.83657
CNAG_00906	-	nucleolar pre-ribosomal-associated protein 1, variant	12669	10960	11866	9165	8214	8006	1.11e-16	-0.989143	6.01e-18	74.5183	0.503777	15.9564
CNAG_00907	-	hypothetical protein, variant	215	118	175	1500	1634	1610	2.27e-40	2.71778	3.16e-42	185.431	6.57861	39.6431
CNAG_00908	-	hypothetical protein	6	0	2	36	32	38	0.000114335	3.21853	3.26992e-05	17.2541	9.30839	3.94182
CNAG_00909	-	phosphopantothenoylcysteine decarboxylase	525	579	553	945	797	1042	0.104243	0.232886	0.0628429	3.46072	1.17518	0.981955
CNAG_00911	-	phytanoyl-CoA dioxygenase	0	0	7	21	22	9	0.0756912	2.40909	0.0435924	4.07228	5.3114	1.12095
CNAG_00914	KRE6	glucosidase	13803	12281	13792	20341	19444	19957	0.529787	0.0756911	0.432858	0.615142	1.05387	0.275899
CNAG_00915	-	hypothetical protein	106	92	138	1127	936	902	5.26e-38	2.63616	8.22e-40	174.369	6.21676	37.2786
CNAG_00916	WDP2	transcription factor	3148	3704	2949	4875	5012	5328	0.381232	0.124523	0.287436	1.13159	1.09015	0.418811
CNAG_00917	-	alkylbase DNA N-glycosylase	2297	2248	2130	2326	2345	2760	0.000603997	-0.358042	0.00020059	13.8256	0.780223	3.21897
CNAG_00919	-	carboxypeptidase D	2352	1850	2691	1789	1526	1616	4.54e-10	-0.991215	5.37e-11	43.0379	0.503054	9.34258
CNAG_00920	-	YjeF family protein	741	909	755	994	1054	1403	0.991423	0.00278631	0.984914	0.000357514	1.00193	0.00374113
CNAG_00921	-	glutathione transferase	797	937	750	1732	1547	1672	0.000492993	0.48503	0.000160512	14.2447	1.39961	3.30716
CNAG_00922	-	hypothetical protein	1808	1867	1689	2344	2165	2588	0.352249	-0.109216	0.260387	1.2667	0.927092	0.45315
CNAG_00923	-	membrane protein	663	591	653	1662	1252	1559	2.53e-07	0.716955	4.55e-08	29.8994	1.64371	6.59723
CNAG_00924	-	hypothetical protein	0	0	0	0	0	0	1		1
CNAG_00925	ISP7	Identified spore protein 7	77	114	151	319	266	319	0.00109026	0.888712	0.000384868	12.6043	1.85152	2.96247
CNAG_00926	-	alpha-1,3/alpha-1,6-mannosyltransferase	2911	2601	2712	3573	3163	3679	0.113619	-0.170793	0.0695432	3.29377	0.888354	0.94455
CNAG_00927	SWT21	guanyl nucleotide binding protein	1164	932	1200	1453	1412	1580	0.622275	-0.0789178	0.531952	0.390662	0.946768	0.206017
CNAG_00928	-	peptidase	780	939	895	986	995	1149	0.0723909	-0.252924	0.0413891	4.16001	0.839194	1.14032
CNAG_00929	-	hypothetical protein	1539	2071	1489	1762	1555	2093	0.00960699	-0.432574	0.00423355	8.18083	0.740939	2.01741
CNAG_00930	-	Argininosuccinate synthase	59844	46313	49295	39720	38283	34682	5.97e-12	-0.966958	5.39e-13	52.059	0.511584	11.2242
CNAG_00931	-	protein transporter	514	614	609	598	511	763	0.0160246	-0.412502	0.00747734	7.15456	0.751319	1.79521
CNAG_00932	-	hypothetical protein	227	243	142	2539	1471	1894	1.58e-29	2.75707	3.65e-31	134.8	6.7602	28.8015
CNAG_00933	-	hypothetical protein	463	411	501	1051	878	1312	6.72677e-06	0.717225	1.53344e-06	23.1056	1.64402	5.17219
CNAG_00934	DAL1	Allantoinase	24	47	41	43	25	40	0.264108	-0.572491	0.18523	1.75516	0.672455	0.578218
CNAG_00935	-	DNA-binding protein	27420	23450	24403	26905	24324	26224	8.3391e-06	-0.467645	1.92764e-06	22.6658	0.723144	5.07888
CNAG_00936	-	lipid particle protein	1836	2237	1911	2658	2762	3400	0.785695	0.0443112	0.718458	0.129975	1.03119	0.104746
CNAG_00937	-	hypothetical protein, variant 2	10	8	15	18	10	18	0.966512	-0.0414259	0.949324	0.00403929	0.971694	0.0147929
CNAG_00938	-	hypothetical protein	673	934	694	1097	1159	1465	0.366839	0.176653	0.273607	1.19857	1.13026	0.435525
CNAG_00939	-	glucan 1,3-beta-glucosidase	2	1	10	67	53	64	1.29441e-06	3.31073	2.6e-07	26.5292	9.92272	5.88793
CNAG_00940	RRP44	exosome complex exonuclease DIS3/RRP44	6306	6421	6379	8370	8938	8496	0.576833	-0.0721444	0.480812	0.49702	0.951223	0.23895
CNAG_00941	-	hypothetical protein	213	185	194	559	557	631	1.45e-11	1.05	1.38e-12	50.2099	2.07053	10.8381
CNAG_00960	-	ATP-dependent RNA helicase DHX8/PRP22	6859	8206	7820	10166	10000	10543	0.516245	-0.08531	0.419001	0.653115	0.942582	0.287144
CNAG_00961	-	hypothetical protein	597	1012	604	1524	1802	1825	0.00139248	0.708865	0.000503025	12.1044	1.63452	2.85621
CNAG_00964	-	hypothetical protein	114	100	168	315	308	529	0.000128685	1.06643	3.71989e-05	17.0092	2.09424	3.89047
CNAG_00966	-	aromatic-L-amino-acid decarboxylase	2813	2580	2614	4299	4179	4609	0.0482919	0.198568	0.0260909	4.94998	1.14756	1.31613
CNAG_00967	-	hypothetical protein	918	823	732	2341	2365	2472	3.33e-16	1.02887	1.94e-17	72.2089	2.04042	15.4778
CNAG_00968	-	hypothetical protein, variant	322	393	347	540	670	742	0.0488361	0.365936	0.0264386	4.9271	1.28872	1.31126
CNAG_00969	-	hypothetical protein	208	172	163	226	200	263	0.465048	-0.171416	0.366298	0.816186	0.887971	0.332502
CNAG_00970	-	phosphatidate cytidylyltransferase	10589	10057	8911	12276	13428	13653	0.481204	-0.0947001	0.382277	0.763365	0.936467	0.31767
CNAG_00971	MON1	vacuolar fusion protein MON1	601	640	589	862	800	901	0.875259	-0.0252829	0.827799	0.047317	0.982628	0.0578634
CNAG_00972	-	hypothetical protein	4236	3415	3652	4943	4352	5030	0.183248	-0.169108	0.120904	2.40557	0.889393	0.73696
CNAG_00973	-	hypothetical protein	1739	1230	1966	1691	1626	1837	0.0126592	-0.447679	0.00574826	7.62757	0.733221	1.89759
CNAG_00974	-	beta-lactamase	145	127	133	297	322	346	0.000123963	0.742698	3.57273e-05	17.0859	1.6733	3.90671
CNAG_00975	-	hypothetical protein	858	776	1023	1680	1378	1371	0.196582	0.230901	0.131079	2.27968	1.17357	0.706455
CNAG_00976	-	carbamoyl-phosphate synthase, small subunit	14729	10495	14754	15809	14635	15873	0.0554188	-0.296293	0.0305815	4.6763	0.814342	1.25634
CNAG_00977	-	VHS domain-containing protein	4612	5216	4281	6299	6604	7920	0.753756	0.0473191	0.680077	0.170039	1.03334	0.122769
CNAG_00978	-	NADH dehydrogenase (ubiquinone) 1 alpha subcomplex 9	8627	7330	6914	8323	8765	8755	0.00944261	-0.33044	0.0041495	8.21721	0.795294	2.02491
CNAG_00979	CTR4	Copper uptake transporter	19872	16206	27997	23060	20870	32121	0.207997	-0.274634	0.140188	2.1759	0.82666	0.681943
CNAG_00980	-	hypothetical protein	14	37	23	48	62	84	0.0888587	0.869292	0.0522576	3.7675	1.82677	1.0513
CNAG_00981	-	hypothetical protein	6	1	0	4	17	14	0.200211	1.8242	0.133975	2.24584	3.54112	0.698513
CNAG_00982	-	hypothetical protein	4052	3849	3720	4019	4052	4646	8.4224e-05	-0.38181	2.34411e-05	17.887	0.767474	4.07456
CNAG_00983	-	hypothetical protein	1063	1493	1167	1577	1499	1844	0.535292	-0.113131	0.438738	0.59958	0.924579	0.271409
CNAG_00984	-	glucose and ribitol dehydrogenase	1593	1529	962	6146	2913	1958	0.141716	0.936519	0.0898424	2.87719	1.9139	0.848581
CNAG_00985	-	hypothetical protein, variant	769	719	599	821	710	758	0.0178435	-0.37555	0.0084314	6.93947	0.770812	1.74852
CNAG_00986	UBA4	adenylyltransferase and sulfurtransferase	1964	1955	2017	2219	2247	2371	0.00323888	-0.305364	0.00127437	10.3793	0.809238	2.4896
CNAG_00987	PAC10	prefoldin subunit	3809	3496	3428	4201	3964	4812	0.019596	-0.239498	0.00936068	6.75268	0.84704	1.70783
CNAG_00988	-	importin subunit beta-1	14571	12350	12382	16198	16054	15815	0.0815047	-0.215615	0.0474116	3.93072	0.861179	1.08882
CNAG_00989	UCH2	ubiquitin carboxyl-terminal hydrolase L5	1291	1129	991	1336	1364	1380	0.0965407	-0.248977	0.0574282	3.61014	0.841493	1.01529
CNAG_00990	-	F-type H -transporting ATPase subunit H, variant	15634	13345	12194	14773	13497	14876	0.000267753	-0.442058	8.2502e-05	15.5001	0.736084	3.57227
CNAG_00991	-	flap endonuclease 1	3845	2951	3882	4521	4417	5017	0.408128	-0.12459	0.312482	1.02016	0.917264	0.389203
CNAG_00992	-	homocitrate synthase, mitochondrial	37949	33581	33359	32568	31401	30413	4.99e-09	-0.657782	6.85e-10	38.0616	0.633852	8.30221
CNAG_00993	-	ubiquinone biosynthesis monooxygenase Coq7	1530	1389	1545	1806	1742	2081	0.123724	-0.17837	0.0769087	3.12905	0.883701	0.907545
CNAG_00994	-	protein mago nashi	5148	3925	4171	4944	4808	5167	0.0111932	-0.336826	0.00501512	7.87398	0.791781	1.95105
CNAG_00995	-	hypothetical protein, variant	1360	3772	969	5250	5623	4798	0.197525	0.855163	0.131902	2.26998	1.80896	0.704379
CNAG_00996	PMT4	dolichyl-phosphate-mannose-protein mannosyltransferase	7577	6725	7030	9510	9059	9974	0.403365	-0.0898251	0.307942	1.03948	0.939637	0.394302
CNAG_00997	-	hypothetical protein	3936	2749	3218	3292	3051	3514	0.000373377	-0.51729	0.000118169	14.8217	0.698683	3.42785
CNAG_00998	-	hypothetical protein	2985	3159	2921	4080	3858	4274	0.46914	-0.0808206	0.370386	0.802369	0.94552	0.328697
CNAG_00999	-	hypothetical protein	2459	2136	2235	1298	1144	1089	1.6e-27	-1.45688	4.1e-29	125.43	0.364279	26.7952
CNAG_01000	-	nuclear pore complex protein Nup155	8723	9136	8660	9449	9419	9255	5.75527e-05	-0.422024	1.55399e-05	18.6701	0.746377	4.23993
CNAG_01001	-	hypothetical protein	103	72	151	548	565	645	2.11e-14	1.91971	1.46e-15	63.687	3.78347	13.6764
CNAG_01002	-	hypothetical protein	613	335	588	2756	2227	2464	1.01e-16	1.76939	5.39e-18	74.731	3.4091	15.9973
CNAG_01003	NCP1	NADPH-ferrihemoprotein reductase	8467	8167	7888	8521	8360	8793	1.87586e-06	-0.442525	3.89e-07	25.7476	0.735845	5.7268
CNAG_01004	-	hypothetical protein, variant 2	2711	2744	3178	2532	2621	2551	5.04e-08	-0.670839	8.14e-09	33.2411	0.628141	7.29733
CNAG_01005	-	glutaredoxin	10964	9515	9987	10314	8533	10269	5.17e-08	-0.577655	8.37e-09	33.1864	0.670052	7.28676
CNAG_01006	-	hypothetical protein	643	711	691	989	862	1005	0.849731	-0.030309	0.796446	0.0665378	0.979211	0.0707187
CNAG_01007	-	C2 domain-containing protein	744	1102	806	1293	1505	1614	0.265339	0.222833	0.186189	1.74752	1.16702	0.5762
CNAG_01008	-	hypothetical protein	1718	1784	1782	1371	1425	1515	2.36e-14	-0.803384	1.65e-15	63.4494	0.573004	13.6263
CNAG_01009	-	hypothetical protein	3252	2631	2941	5109	4294	4888	0.15896	0.185364	0.102592	2.66478	1.1371	0.798713
CNAG_01010	-	hypothetical protein	2796	2651	3010	3743	3258	3457	0.0999125	-0.202241	0.0597534	3.54422	0.8692	1.00038
CNAG_01011	-	hypothetical protein	476	394	553	1011	840	940	0.00730225	0.461959	0.00311915	8.73643	1.37741	2.13654
CNAG_01012	-	hypothetical protein	1442	1475	1279	1545	1496	1638	0.00275311	-0.353179	0.00106699	10.7076	0.782857	2.56018
CNAG_01013	SWD3	chromatin binding protein	1536	1659	1409	1608	1525	1587	0.000115728	-0.472896	3.31404e-05	17.2286	0.720517	3.93656
CNAG_01014	ZFC4	hypothetical protein	1863	3142	1784	5543	4452	5064	0.00347726	0.636801	0.00137714	10.2362	1.55488	2.45876
CNAG_01015	-	cytoplasmic protein	1955	1741	1715	3460	3061	3565	0.00035879	0.386825	0.000113288	14.9012	1.30751	3.44516
CNAG_01016	SEA3	vacuolar membrane protein	1966	2108	1596	2888	2654	2973	0.636204	0.0756512	0.547809	0.361256	1.05384	0.196404
CNAG_01017	-	E3 ubiquitin-protein ligase SHPRH, variant	1410	1976	1614	2104	2100	2520	0.626985	-0.0873176	0.537405	0.38037	0.941271	0.202743
CNAG_01018	-	histone-lysine N-methyltransferase Su(var)3-9	24647	20745	23270	23257	22908	24826	6.82937e-06	-0.461208	1.5585e-06	23.0744	0.726378	5.16562
CNAG_01019	SOD1	superoxide dismutase [Cu-Zn]	18244	17695	10396	38275	34503	28033	0.00599838	0.621585	0.00249951	9.14095	1.53856	2.22197
CNAG_01020	-	hypothetical protein	4689	4015	4307	4741	4212	4917	5.74435e-05	-0.419304	1.54963e-05	18.6755	0.747785	4.24076
CNAG_01021	-	ATP phosphoribosyltransferase	15678	12926	12820	12682	12793	12904	2.26e-07	-0.616937	4.03e-08	30.1358	0.652054	6.64661
CNAG_01022	-	hypothetical protein	799	1283	891	1242	1397	1740	0.871513	0.0415424	0.8234	0.049807	1.02921	0.059726
CNAG_01023	SCC1	cohesin complex subunit SCC1	1743	1625	1768	1580	1700	1899	9.56564e-06	-0.499157	2.23822e-06	22.3789	0.70752	5.01929
CNAG_01024	-	translocation protein SEC72	1661	1556	1438	2238	1695	2511	0.772149	-0.0498545	0.702463	0.145922	0.966034	0.112299
CNAG_01025	-	hypothetical protein	2596	2396	2140	3634	3117	3552	0.896864	0.0199156	0.857606	0.0321925	1.0139	0.0472736
CNAG_01026	-	gamma-glutamyltransferase	1037	942	950	2575	2221	2573	6.69e-14	0.819707	4.85e-15	61.3198	1.76505	13.1747
CNAG_01027	-	succinate-semialdehyde dehydrogenase (NADP)	11446	9372	9312	12744	12951	14386	0.464211	-0.0984716	0.365524	0.818824	0.934022	0.333284
CNAG_01028	-	hypothetical protein	474	499	504	712	523	862	0.942827	-0.0168171	0.916975	0.010867	0.988411	0.0255682
CNAG_01029	-	impact family protein	2637	2763	2417	3049	3082	3444	0.0524547	-0.218616	0.028675	4.78702	0.859389	1.28022
CNAG_01030	-	hypothetical protein, variant	550	580	588	773	742	808	0.616126	-0.0750957	0.525266	0.403541	0.949279	0.210331
CNAG_01031	-	hypothetical protein	676	2288	443	1909	2464	2052	0.655085	0.409203	0.567692	0.32656	1.32795	0.183702
CNAG_01032	-	hypothetical protein	325	327	364	795	716	756	8.99983e-06	0.648899	2.09033e-06	22.5102	1.56797	5.04577
CNAG_01033	-	exosome complex component CSL4	1427	1398	1563	1617	1596	1890	0.0102496	-0.295184	0.00455832	8.04683	0.814968	1.98929
CNAG_01034	-	hypothetical protein	51	37	65	181	136	233	3.04099e-05	1.32299	7.79596e-06	19.9873	2.50184	4.51699
CNAG_01035	-	20S proteasome subunit alpha 4	9240	7986	9121	9440	10012	10764	0.00465105	-0.311782	0.00188604	9.65727	0.805646	2.33245
CNAG_01036	-	geranylgeranyl transferase type-2 subunit beta	1102	1060	986	915	946	1023	8e-08	-0.636446	1.33e-08	32.2853	0.643296	7.09682
CNAG_01037	MLH3	DNA mismatch repair protein MLH3	592	729	797	766	825	928	0.125038	-0.262143	0.0778084	3.1101	0.833848	0.902959
CNAG_01038	-	hypothetical protein	1153	1332	1251	1471	1342	1568	0.0202241	-0.282882	0.00971544	6.68634	0.821947	1.69413
CNAG_01039	-	superkiller protein 3	4905	6293	5445	6790	6903	7757	0.299874	-0.146125	0.21496	1.5377	0.903674	0.52306
CNAG_01040	-	carboxypeptidase D	68	93	72	171	207	219	0.0013149	0.846539	0.000471927	12.2234	1.79818	2.88111
CNAG_01041	-	hypothetical protein	148	168	203	251	190	231	0.593365	-0.140122	0.498727	0.457645	0.907442	0.226678
CNAG_01042	-	hypothetical protein	496	357	622	1187	1107	1375	5.7937e-05	0.801035	1.56557e-05	18.656	1.74235	4.23704
CNAG_01043	-	hypothetical protein	10416	11389	8222	13071	12564	12271	0.298102	-0.170344	0.213579	1.547	0.888631	0.525635
CNAG_01044	-	dihydroceramidase	1239	1615	1082	1294	1109	1330	0.000578345	-0.59008	0.000191573	13.912	0.664306	3.23781
CNAG_01045	-	hypothetical protein	5432	4899	5345	5120	5065	4719	1.21335e-06	-0.577357	2.42e-07	26.6625	0.670191	5.91601
CNAG_01046	-	N,N-dimethylglycine oxidase	3390	3490	3304	3515	3613	3723	4.04367e-05	-0.416989	1.06101e-05	19.3983	0.748986	4.39322
CNAG_01047	-	hypothetical protein	212	139	93	1001	447	370	0.01642	1.53555	0.00768276	7.10597	2.89899	1.78463
CNAG_01048	-	hypothetical protein, variant	34	36	24	206	149	219	6.84e-12	2.09212	6.21e-13	51.7793	4.26375	11.1647
CNAG_01049	-	H/ACA ribonucleoprotein complex subunit 3	6537	4518	5529	4689	4541	4411	2.07e-07	-0.786714	3.67e-08	30.3141	0.579663	6.68442
CNAG_01050	-	hypothetical protein	2192	2415	1989	3331	2924	3356	0.833728	0.0313625	0.777756	0.0796618	1.02198	0.0789758
CNAG_01051	NIP100	dynactin 1	2309	2612	2907	3911	3943	3852	0.637688	0.0736323	0.549402	0.35839	1.05236	0.195391
CNAG_01052	-	hypothetical protein	2061	3050	1162	8889	4956	4143	0.0936123	1.01792	0.0553985	3.67005	2.025	1.02867
CNAG_01053	-	nuclear pore complex protein Nup160	7308	7889	7211	10977	11527	11067	0.557629	0.0770213	0.46164	0.541915	1.05484	0.253654
CNAG_01054	SSU72	RNA polymerase II subunit A domain phosphatase ssu72	1614	2123	1761	2143	2344	2432	0.263499	-0.178089	0.184673	1.75961	0.883873	0.57922
CNAG_01055	-	phospholipid transporter, variant	3999	3984	4056	4180	4279	4929	0.000171568	-0.359017	5.0903e-05	16.4142	0.779696	3.76556
CNAG_01056	-	hypothetical protein	22	28	31	104	75	100	0.000598091	1.26887	0.000198555	13.8447	2.40973	3.22323
CNAG_01057	CSN2	COP9 signalosome complex subunit 2	3312	3341	3303	3977	3944	4299	0.0249836	-0.214632	0.0123736	6.25654	0.861766	1.60234
CNAG_01058	-	nitric oxide synthase-interacting protein	1831	1996	1935	2243	1926	2345	0.00220259	-0.336583	0.000831964	11.1685	0.791915	2.65707
CNAG_01059	-	vacuolar membrane protein, variant	493	389	515	597	550	568	0.24456	-0.21182	0.169445	1.88785	0.863447	0.611615
CNAG_01060	-	hypothetical protein	36398	26828	27789	25970	24046	28283	4.69e-08	-0.728535	7.53e-09	33.3924	0.603517	7.32847
CNAG_01061	FRK102	serine/threonine protein kinase	260	222	271	558	499	550	0.00038602	0.583759	0.000122788	14.7494	1.49875	3.41339
CNAG_01062	PSK201	CAMK/CAMKL/PASK protein kinase	3917	4313	3632	8279	8110	8281	1.54773e-06	0.548253	3.15e-07	26.1546	1.46231	5.8103
CNAG_01063	KOG1	WD-repeat protein mip1	6490	6521	5920	8640	8854	9230	0.932075	-0.0113389	0.90425	0.0144706	0.992171	0.0305492
CNAG_01064	-	hypothetical protein	536	442	523	1038	862	995	0.00303156	0.436816	0.00118869	10.5078	1.35361	2.51833
CNAG_01065	-	hypothetical protein	611	568	606	1141	1197	1307	2.28746e-05	0.519649	5.72639e-06	20.5775	1.43361	4.64065
CNAG_01069	-	hypothetical protein	669	645	603	905	801	913	0.686845	-0.0609753	0.604167	0.268757	0.958616	0.163141
CNAG_01070	-	class II aldolase/adducin family protein	24	52	61	224	216	275	1.78e-08	1.86679	2.69e-09	35.3979	3.64719	7.75061
CNAG_01071	-	hypothetical protein	827	1258	1014	1372	1264	1463	0.584156	-0.109834	0.488628	0.479546	0.926695	0.233472
CNAG_01072	-	Amidase	480	604	471	972	868	975	0.0317602	0.34471	0.0162492	5.77571	1.2699	1.49812
CNAG_01073	-	hypothetical protein, variant	599	625	707	1396	1243	1469	5.87763e-06	0.576484	1.32686e-06	23.3839	1.49121	5.2308
CNAG_01074	-	neutral amino acid transporter, variant	61	97	57	109	117	133	0.533877	0.226365	0.437185	0.60366	1.16988	0.272558
CNAG_01075	-	methylmalonate-semialdehyde dehydrogenase (acylating)	128	138	115	288	324	356	3.75732e-05	0.833988	9.81256e-06	19.5476	1.78261	4.42512
CNAG_01076	-	4-aminobutyrate aminotransferase	96	103	92	310	268	336	1.78e-08	1.13697	2.7e-09	35.3901	2.19918	7.74923
CNAG_01077	-	hypothetical protein	102	96	98	442	472	470	1.44e-20	1.7176	5.6e-22	92.8643	3.2889	19.8412
CNAG_01078	-	aldehyde dehydrogenase (NAD)	1521	1443	1588	5244	7211	7926	3.04e-26	1.65111	8.31e-28	119.459	3.14074	25.5165
CNAG_01079	-	2,4-dihydroxyhept-2-ene-1,7-dioic acid aldolase	78	96	107	244	164	326	0.00296886	0.856942	0.00116265	10.5488	1.8112	2.52741
CNAG_01080	-	Glycolate oxidase	539	399	579	615	512	667	0.159282	-0.272502	0.102859	2.66065	0.827883	0.797833
CNAG_01081	-	hypothetical protein	163	179	159	456	315	460	0.000118948	0.779052	3.41064e-05	17.174	1.716	3.92464
CNAG_01082	-	hypothetical protein	2943	3589	2755	5732	6069	6320	0.000934901	0.454916	0.000323129	12.9313	1.3707	3.02923
CNAG_01083	RPN5	26S proteasome regulatory subunit N5	10077	11026	10520	11764	13163	13523	0.0496018	-0.226783	0.0269019	4.89709	0.854538	1.3045
CNAG_01084	UBC4	ubiquitin-conjugating enzyme 4	919	1021	836	1352	1078	1282	0.573896	-0.093259	0.477647	0.504231	0.937403	0.241167
CNAG_01085	-	hypothetical protein	292	233	244	424	407	569	0.0736105	0.346698	0.0422312	4.12591	1.27165	1.13306
CNAG_01086	-	hypothetical protein	345	459	375	549	506	770	0.631926	0.10815	0.543038	0.369937	1.07785	0.199334
CNAG_01087	-	hypothetical protein	1634	2251	1788	4059	3610	4537	6.37497e-05	0.589677	1.73621e-05	18.4588	1.50491	4.19552
CNAG_01088	-	hypothetical protein	2121	1523	1774	2290	2215	2067	0.183787	-0.225204	0.121304	2.4004	0.855474	0.735685
CNAG_01089	-	hypothetical protein	2442	1946	2278	2844	2740	3440	0.600374	-0.0773341	0.506549	0.441189	0.947807	0.221578
CNAG_01090	-	alpha/beta hydrolase fold protein	622	583	820	772	765	919	0.196991	-0.235016	0.131473	2.27503	0.849675	0.705553
CNAG_01091	-	U5 small nuclear ribonucleoprotein component	15434	15846	15706	16978	17849	18928	0.000867117	-0.315325	0.000297355	13.087	0.80367	3.06192
CNAG_01092	-	hypothetical protein	6259	5797	5281	4868	5222	5332	2.34e-09	-0.676743	3.06e-10	39.6384	0.625576	8.6307
CNAG_01093	-	hypothetical protein	1185	1268	1042	1520	1506	1972	0.998055	-0.00073002	0.995233	3.56979e-05	0.999494	0.00084538
CNAG_01094	-	pre-mRNA-splicing factor CWC25	2896	3010	2887	3900	3392	4123	0.198135	-0.136939	0.132382	2.26435	0.909447	0.70304
CNAG_01095	-	BEM46 family protein	777	799	703	1109	1009	1157	0.945526	0.0114592	0.92009	0.0100642	1.00797	0.0243264
CNAG_01096	-	hypothetical protein	1211	1022	1378	1330	1151	1469	0.0102496	-0.384997	0.00455721	8.04728	0.765781	1.98929
CNAG_01097	-	short-chain dehydrogenase/reductase SDR	2450	2288	2237	5414	4047	4308	0.00107329	0.473176	0.000377821	12.6388	1.38816	2.96928
CNAG_01098	-	pre-rRNA-processing protein ipi1	5055	4456	4842	4873	4265	4544	1.21e-07	-0.577573	2.07e-08	31.4298	0.67009	6.9163
CNAG_01099	-	cleavage and polyadenylation specificity factor subunit 2	4135	4000	4164	4731	4938	5513	0.0394016	-0.207307	0.0207787	5.34526	0.866153	1.40449
CNAG_01100	-	hypothetical protein	1017	1223	1124	1794	1694	2205	0.0808025	0.242309	0.0469336	3.94777	1.18288	1.09257
CNAG_01101	-	hypothetical protein	1546	1542	1799	1140	1194	1266	6.33e-15	-0.950544	4.12e-16	66.1758	0.517437	14.1987
CNAG_01102	-	oxidoreductase	1232	3293	957	4023	4410	3668	0.352597	0.637541	0.260774	1.26464	1.55568	0.452721
CNAG_01103	PRP11	splicing factor 3a subunit 2	4209	3423	4046	3823	3770	4575	0.000137034	-0.45397	3.98483e-05	16.8786	0.730031	3.86317
CNAG_01104	-	ribosomal RNA-processing protein 8	4694	3786	4541	3738	3364	3731	4.09e-11	-0.775096	4.23e-12	48.0131	0.58435	10.3883
CNAG_01105	-	hypothetical protein	2226	2196	2372	3222	2534	2727	0.184096	-0.188488	0.121577	2.39689	0.877525	0.734955
CNAG_01106	VPH1	V-type H -transporting ATPase subunit I	7509	7007	7103	9352	9234	10301	0.353715	-0.0926029	0.261731	1.25958	0.937829	0.451347
CNAG_01107	-	phosphatidylinositol glycan, class A	3504	3565	3801	3934	3872	4275	0.000223327	-0.358297	6.78522e-05	15.8698	0.780085	3.65106
CNAG_01108	DAL2	Allantoicase	1973	1961	1798	3565	3621	3589	0.000380247	0.403573	0.000120811	14.78	1.32278	3.41993
CNAG_01109	-	hypothetical protein	3996	2894	3850	6030	5714	5714	0.226246	0.194894	0.154614	2.02613	1.14464	0.645419
CNAG_01110	RBL2	co-chaperone	1916	1541	1831	2440	2423	2595	0.93751	-0.0128615	0.910421	0.0126581	0.991125	0.0280243
CNAG_01111	-	translation initiation factor 3 subunit K	14027	12098	13176	10273	10418	11077	1.73e-16	-0.815862	9.63e-18	73.5864	0.568069	15.7611
CNAG_01112	-	xenobiotic reductase	2281	2257	2243	3565	2762	3337	0.995238	-0.00135983	0.990092	0.000154212	0.999058	0.00207291
CNAG_01113	-	hypothetical protein	5629	4167	4945	4084	3587	4614	4.94e-09	-0.777326	6.77e-10	38.0845	0.583447	8.30654
CNAG_01114	-	hypothetical protein	1312	997	1196	919	788	1235	3.95193e-06	-0.773731	8.68e-07	24.2011	0.584903	5.40319
CNAG_01115	-	hypothetical protein	3544	4601	3619	6907	6744	7353	0.0196131	0.325294	0.00937366	6.75021	1.25292	1.70745
CNAG_01116	-	beta-ketoacyl reductase	535	403	454	685	547	654	0.712643	-0.0732423	0.633957	0.226733	0.950499	0.147128
CNAG_01117	EF3	elongation factor 3	171876	143671	147113	148124	149013	137563	2.30126e-06	-0.593699	4.88e-07	25.3125	0.662642	5.63803
CNAG_01118	-	AAT family amino acid transporter	436	258	513	473	358	465	0.123724	-0.410724	0.0768912	3.12942	0.752246	0.907545
CNAG_01119	-	POT family proton-dependent oligopeptide transporter	26586	18746	23792	17471	18241	18067	1.26e-09	-0.867928	1.59e-10	40.9176	0.547933	8.89838
CNAG_01120	-	pyruvate dehydrogenase complex dihydrolipoamide acetyltransferase	54973	45809	40836	51067	51657	60124	0.0214773	-0.310351	0.0103852	6.56759	0.806446	1.66802
CNAG_01121	-	hypothetical protein	146	43	100	977	770	1125	2.08e-17	2.79682	1.02e-18	78.0158	6.94909	16.6823
CNAG_01122	-	hypothetical protein	56	54	73	138	114	124	0.0840914	0.529254	0.0490714	3.87291	1.44318	1.07525
CNAG_01123	-	DRAP deaminase	3727	3309	3364	3056	2737	3057	2.96e-13	-0.743042	2.31e-14	58.245	0.597478	12.5288
CNAG_01124	-	hypothetical protein	462	271	387	452	390	465	0.212897	-0.288231	0.144078	2.13386	0.818905	0.671831
CNAG_01125	-	hypothetical protein	7724	9055	6785	6453	6570	6803	1.25e-08	-0.758184	1.84e-09	36.1401	0.59124	7.90171
CNAG_01126	-	guanine nucleotide exchange protein for ADP- robosylation factor	6812	6997	7078	9960	9749	10591	0.809761	0.0266182	0.747319	0.103797	1.01862	0.0916432
CNAG_01127	-	hypothetical protein	1582	1321	1504	2512	2385	2328	0.133981	0.207405	0.0842466	2.98101	1.15461	0.872958
CNAG_01128	-	Hydroxyacylglutathione hydrolase	3492	3136	3031	3806	3701	4217	0.0310833	-0.23174	0.0157958	5.82547	0.851607	1.50747
CNAG_01129	ERG7	lanosterol synthase	3845	3386	3455	4814	4409	4670	0.274515	-0.129825	0.19371	1.68917	0.913942	0.561433
CNAG_01130	-	hypothetical protein	21564	16195	17639	23815	22750	20354	0.155159	-0.229684	0.0997761	2.70912	0.852822	0.809224
CNAG_01131	-	hypothetical protein	969	532	581	3712	2929	3334	2.94e-16	1.75184	1.69e-17	72.4778	3.36789	15.5323
CNAG_01132	-	nucleolar protein 6	2855	2523	2979	2536	2050	2448	2.23e-10	-0.760613	2.54e-11	44.5052	0.590246	9.65161
CNAG_01133	-	mitochondrial protein	458	507	514	628	684	699	0.70542	-0.0656098	0.625537	0.238162	0.955541	0.151552
CNAG_01134	-	hypothetical protein	1565	1556	1618	2803	2575	2994	0.00179842	0.308929	0.000667581	11.5774	1.23879	2.74511
CNAG_01135	-	delta(3,5)-Delta(2,4)-dienoyl-CoA isomerase, variant 2	263	259	227	760	633	883	8.07e-12	1.08601	7.41e-13	51.4319	2.12286	11.0931
CNAG_01136	-	hypothetical protein	5618	5257	5325	6087	5882	7070	0.00283244	-0.280299	0.00110213	10.6476	0.82342	2.54784
CNAG_01137	-	aconitate hydratase, mitochondrial	51079	44636	45851	49426	54223	52123	0.00161461	-0.367588	0.000593591	11.796	0.775077	2.79193
CNAG_01138	CCP1	cytochrome c peroxidase, mitochondrial	11311	12401	11278	18902	23270	21645	0.00747019	0.361533	0.0032019	8.68869	1.28479	2.12667
CNAG_01139	-	hypothetical protein	20	38	48	107	89	56	0.125232	0.753226	0.0779753	3.10661	1.68556	0.902286
CNAG_01140	-	ATP-dependent RNA helicase DRS1	8577	8955	9759	7779	7549	7673	9.69e-13	-0.754568	7.91e-14	55.8278	0.592724	12.0137
CNAG_01141	RRP40	exosome complex component RRP40	2292	1923	2061	2437	2043	2577	0.00447005	-0.344574	0.0018077	9.73523	0.78754	2.34969
CNAG_01142	-	endoplasmic reticulum protein	1888	2425	1862	2563	2957	3160	0.920673	-0.0196316	0.889022	0.0194719	0.986485	0.0358945
CNAG_01143	-	hypothetical protein	1543	1324	1675	2087	1989	2408	0.999846	0.00034849	0.99751	9.73919e-06	1.00024	6.69764e-05
CNAG_01144	RPA70/RFA1	replication factor A1	5867	4682	7101	8836	7531	8855	0.989144	0.00351931	0.980785	0.000580068	1.00244	0.00474028
CNAG_01145	-	hypothetical protein	2642	2379	2366	2605	2464	2784	3.27039e-05	-0.422628	8.43633e-06	19.8363	0.746064	4.4854
CNAG_01146	-	U3 small nucleolar RNA-associated protein 22	9171	7853	9002	8193	7421	7195	1.7e-08	-0.695703	2.55e-09	35.5016	0.617408	7.77055
CNAG_01147	-	arp2/3 complex 20 kDa subunit	2627	2099	2189	2740	2762	3133	0.151456	-0.190402	0.097114	2.75231	0.876362	0.819715
CNAG_01148	FPR3	FK506-binding protein 4	34715	31563	34604	29642	31862	33926	2.72e-09	-0.589456	3.6e-10	39.3206	0.664593	8.5649
CNAG_01149	-	hypothetical protein	2732	3046	3212	4383	3925	4535	0.989144	0.00247004	0.980874	0.0005747	1.00171	0.00474028
CNAG_01150	-	omega-6 fatty acid desaturase (delta-12 desaturase)	22143	19714	20251	29893	30984	30822	0.657147	0.055456	0.570206	0.322337	1.03919	0.182337
CNAG_01151	UBC5	ubiquitin-conjugating enzyme E2 D/E	1466	1326	1407	1350	1199	1501	2.89e-07	-0.566106	5.25e-08	29.6206	0.675437	6.53858
CNAG_01152	-	small subunit ribosomal protein S6e, variant	178373	141547	131365	140927	137072	141201	5.36041e-06	-0.613583	1.20416e-06	23.5706	0.653572	5.2708
CNAG_01153	-	small subunit ribosomal protein S13e	116525	90148	94836	84092	85444	85935	2.98e-09	-0.7455	3.96e-10	39.1344	0.596461	8.5263
CNAG_01154	-	hypothetical protein	259	282	252	710	557	717	3.37e-07	0.808306	6.18e-08	29.3048	1.75115	6.47253
CNAG_01155	GUT1	glycerol kinase	9994	15612	8277	11251	12874	13395	0.109279	-0.363526	0.0664303	3.36909	0.777263	0.961462
CNAG_01156	CAP2	capsular related protein	6803	6772	6451	8264	8497	9069	0.1606	-0.142373	0.103825	2.64578	0.906028	0.794254
CNAG_01157	-	hypothetical protein	2188	2390	2203	3466	3747	4239	0.0379819	0.243899	0.019918	5.41907	1.18419	1.42042
CNAG_01158	-	branchpoint-bridging protein	16269	15880	14558	16543	16376	17508	3.48504e-05	-0.3988	9.05006e-06	19.7021	0.758489	4.45779
CNAG_01159	-	pre-mRNA-splicing factor slu7	3698	3458	3491	4427	4081	4950	0.0760349	-0.175307	0.0438278	4.06318	0.885579	1.11899
CNAG_01161	-	hypothetical protein	2777	2471	2530	3385	3439	3342	0.357073	-0.119705	0.26483	1.24333	0.920376	0.447243
CNAG_01162	MAK3201	hypothetical protein	1666	1607	1544	2133	2122	2694	0.929694	0.0132921	0.900427	0.0156556	1.00926	0.03166
CNAG_01163	RAD54	DNA repair and recombination protein RAD54-like protein	1175	1170	1293	2600	2463	2473	4.43472e-06	0.54334	9.84e-07	23.9598	1.45734	5.35313
CNAG_01164	-	glutamine-fructose-6-phosphate transaminase (isomerizing)	26837	24116	21528	37195	37067	35777	0.500459	0.096848	0.402927	0.699574	1.06943	0.300632
CNAG_01165	LCB5	D-erythro-sphingosine kinase	1429	1695	1395	5663	5916	5774	1.46e-29	1.43405	3.34e-31	134.979	2.70205	28.836
CNAG_01166	URE4	urease accessory protein	2261	1843	1853	1790	1721	1947	1.9e-07	-0.636857	3.35e-08	30.4927	0.643113	6.72049
CNAG_01167	URE2/SMC3	chromosome associated protein	1942	2083	2401	3387	2951	3739	0.338345	0.134026	0.248111	1.33391	1.09735	0.47064
CNAG_01168	-	H/ACA ribonucleoprotein complex subunit 4	30511	23874	29667	24720	22079	23983	6.66e-10	-0.756695	8.07e-11	42.2407	0.591851	9.17674
CNAG_01169	-	Aspartyl aminopeptidase	3966	3299	3358	3343	3015	3300	2.06e-08	-0.646699	3.13e-09	35.1033	0.63874	7.68704
CNAG_01170	-	small subunit ribosomal protein S17	140612	101870	87655	100794	93288	93865	4.59559e-05	-0.703071	1.21261e-05	19.1433	0.614263	4.33766
CNAG_01171	-	hypothetical protein	1471	879	1360	1148	895	1022	9.61979e-05	-0.784664	2.71455e-05	17.6079	0.580487	4.01683
CNAG_01172	PBX1	parallel beta-helix repeat protein	3315	2767	3173	4612	4521	4747	0.561752	0.0764372	0.465951	0.531563	1.05441	0.250456
CNAG_01173	LAG1	LAG1 family transcription factor, putative	2390	2815	2265	4321	4375	4646	0.0109109	0.326911	0.00487658	7.92465	1.25433	1.96214
CNAG_01174	-	hypothetical protein	4758	4433	4491	10960	8834	8965	1.31071e-05	0.565024	3.14744e-06	21.7245	1.47941	4.88249
CNAG_01175	-	hypothetical protein	3104	2449	2827	3378	3070	3639	0.0525855	-0.244444	0.0287723	4.78118	0.844141	1.27913
CNAG_01177	NEM1	nuclear envelope-endoplasmic reticulum network protein	3377	2906	2852	5097	4718	5497	0.0394814	0.233526	0.0208257	5.34132	1.17571	1.40361
CNAG_01178	-	nuclear envelope-endoplasmic reticulum network protein	1858	2008	2046	2440	2282	2837	0.168879	-0.160154	0.110052	2.55347	0.89493	0.772425
CNAG_01179	-	DNA-directed RNA polymerase I and III subunit RPAC1	8206	6832	7932	6967	6425	6592	8.25e-10	-0.70812	1.01e-10	41.8065	0.612117	9.08381
CNAG_01180	-	hypothetical protein	533	661	489	1120	961	1149	0.00841255	0.427162	0.00365651	8.44698	1.34459	2.07507
CNAG_01181	-	small subunit ribosomal protein S27Ae	178313	145442	145473	128440	128529	130496	2.64e-11	-0.783138	2.66e-12	48.9257	0.581102	10.5779
CNAG_01182	-	cytoplasmic protein	24593	19372	19901	20862	20392	20204	1.17375e-05	-0.561344	2.80267e-06	21.9471	0.677671	4.93043
CNAG_01183	LSB1	hypothetical protein	2086	2391	1971	3179	3278	3504	0.394016	0.117335	0.299448	1.07665	1.08473	0.404487
CNAG_01184	-	hypothetical protein	1367	1586	1659	2655	2606	2971	0.00919784	0.323663	0.00403063	8.26996	1.2515	2.03631
CNAG_01185	-	Hsp70-like protein	7311	8962	7233	6849	8686	10570	0.0315667	-0.364712	0.016123	5.78942	0.776624	1.50077
CNAG_01186	-	hypothetical protein	1341	1572	1622	2653	2617	3131	0.00283244	0.375528	0.00110226	10.6474	1.29731	2.54784
CNAG_01187	-	ribosome production factor 2	6329	5273	6532	4866	4648	4870	7.71e-13	-0.842334	6.23e-14	56.2981	0.557741	12.113
CNAG_01188	-	peroxin-19	1460	1389	1516	2043	2111	2041	0.99649	-0.00110494	0.991712	0.000107907	0.999234	0.00152691
CNAG_01189	-	DNA-directed RNA polymerase I subunit RPA1	10692	9196	11059	9724	9581	9013	4.24e-07	-0.632674	7.91e-08	28.827	0.64498	6.37263
CNAG_01190	-	vesicle transporter SEC22	3446	3373	3328	3699	3766	4256	0.00154012	-0.303441	0.00056507	11.8877	0.810318	2.81245
CNAG_01191	-	long-chain fatty acid transporter, variant 2	595	504	590	2644	2474	2825	1.27e-50	1.72242	1.22e-52	233.157	3.29989	49.895
CNAG_01192	-	hypothetical protein	1210	831	1019	535	480	546	8.39e-20	-1.48111	3.52e-21	89.2279	0.358213	19.0761
CNAG_01193	-	hypothetical protein, variant	37	26	68	469	523	809	2.06e-23	3.25796	6.76e-25	106.172	9.56632	22.6851
CNAG_01194	-	hypothetical protein	34	33	30	168	139	130	1.27e-07	1.66637	2.17e-08	31.3324	3.17416	6.89609
CNAG_01195	-	cation-transporting ATPase 13A3/4/5	4820	4522	4390	6224	5960	6331	0.48827	-0.0777745	0.390052	0.73878	0.947518	0.31134
CNAG_01196	-	tyrosyl-DNA phosphodiesterase 1	2996	2787	2744	3165	3495	3419	0.0270534	-0.265342	0.0135169	6.10017	0.832002	1.56778
CNAG_01197	-	ran GTPase-activating protein 1	7340	5936	6959	7664	7184	8393	0.00662699	-0.311837	0.00279649	8.93571	0.805615	2.17868
CNAG_01198	-	small nuclear ribonucleoprotein F	5480	3788	4542	4256	3830	4631	1.37587e-05	-0.631056	3.31576e-06	21.6246	0.645703	4.86142
CNAG_01199	-	nuclear pore complex protein Nup62	8039	7951	6304	8814	8884	9105	0.0772281	-0.242226	0.044601	4.03366	0.84544	1.11222
CNAG_01200	-	pre-mRNA-splicing factor 38A	1114	1168	992	1115	1122	1205	0.000503375	-0.437789	0.000164394	14.1997	0.738265	3.29811
CNAG_01201	-	hypothetical protein	1053	684	926	954	875	1033	0.0228849	-0.407268	0.0111962	6.4339	0.75405	1.64045
CNAG_01202	-	hypothetical protein	2263	1982	1986	1972	1869	2119	7.68e-08	-0.575071	1.27e-08	32.373	0.671253	7.11448
CNAG_01203	YVH1	dual specificity phosphatase 12	2437	2183	2147	3957	3612	3896	0.0249741	0.25152	0.0123627	6.2581	1.19046	1.60251
CNAG_01204	-	ATP synthase F1, delta subunit	37783	29805	29254	34974	32064	35299	0.000768072	-0.429656	0.000260274	13.3366	0.742439	3.1146
CNAG_01207	-	hypothetical protein	612	513	535	2022	1687	1945	1.3e-22	1.25728	4.54e-24	102.4	2.39045	21.8864
CNAG_01208	CCH1	calcium-channel protein CCH1	1450	1701	1536	4465	4342	4538	7.7e-19	1.00039	3.4e-20	84.7435	2.00054	18.1137
CNAG_01209	FAB1	1-phosphatidylinositol-3-phosphate 5-kinase	1629	1910	1674	2487	2443	2352	0.884016	-0.0243025	0.840864	0.040316	0.983296	0.0535399
CNAG_01210	-	hypothetical protein	19	7	15	37	28	24	0.367976	0.617264	0.274772	1.19277	1.53396	0.43418
CNAG_01211	-	hypothetical protein	6737	6339	6565	7974	7985	8951	0.0745217	-0.168135	0.0428364	4.10184	0.889992	1.12772
CNAG_01212	-	hypothetical protein	1359	1693	1186	1718	1910	1929	0.53145	-0.117757	0.434609	0.610476	0.921619	0.274538
CNAG_01213	-	hypothetical protein	4491	5053	4789	5614	5946	5882	0.059395	-0.224207	0.0331408	4.53849	0.856066	1.22625
CNAG_01214	HOC2	alpha-1,6-mannosyltransferase	207	241	241	317	266	416	0.958323	0.0144905	0.937467	0.00615507	1.01009	0.0184881
CNAG_01215	-	hypothetical protein	1827	1175	1299	1776	1421	1760	0.106187	-0.307185	0.0642109	3.42514	0.808217	0.973929
CNAG_01216	-	6-phosphogluconolactonase	6700	5682	5012	10303	9045	9453	0.135079	0.219947	0.08502	2.96623	1.16469	0.869414
CNAG_01217	-	protein MPE1	3676	3813	3622	4979	5266	5846	0.856679	0.023067	0.804855	0.0610432	1.01612	0.0671819
CNAG_01220	-	mitochondrial FAD-linked sulfhydryl oxidase ERV1	918	856	1013	1159	1132	1468	0.592493	-0.0842547	0.497642	0.459962	0.943272	0.227317
CNAG_01221	-	di-trans,poly-cis-decaprenylcistransferase	1300	1248	1267	1771	1722	2132	0.726343	0.0458476	0.649716	0.206258	1.03229	0.138858
CNAG_01222	-	hypothetical protein	6793	5683	5438	7325	7476	7140	0.126598	-0.212476	0.0789505	3.08637	0.863055	0.897573
CNAG_01223	-	hypothetical protein	921	680	828	2351	2152	1923	5.08e-08	0.901151	8.22e-09	33.2222	1.86756	7.29411
CNAG_01224	-	large subunit ribosomal protein L18-A	277503	190333	222142	182870	175272	182480	2.57e-09	-0.858994	3.39e-10	39.4375	0.551337	8.58968
CNAG_01228	-	hypothetical protein	2744	2157	2609	2538	2234	2770	6.37497e-05	-0.507172	1.73556e-05	18.4595	0.7036	4.19552
CNAG_01229	-	L-mandelate dehydrogenase	1778	1707	1627	2336	2102	2558	0.618458	-0.0607074	0.527745	0.398731	0.958794	0.20869
CNAG_01230	MP98/CDA2	chitin deacetylase 2	28999	29823	22231	46491	47868	42207	0.13014	0.249685	0.0814477	3.03577	1.18895	0.885588
CNAG_01231	-	agmatinase	703	653	657	831	880	848	0.283567	-0.160146	0.201318	1.63279	0.894935	0.547344
CNAG_01232	PMC1	calcium-translocating P-type ATPase, PMCA-type	3309	3054	3061	18509	16381	18058	6.47e-95	1.98037	1.75e-97	439.041	3.94594	94.1891
CNAG_01233	-	hypothetical protein	1068	952	1087	1830	1695	1812	0.0265042	0.271496	0.0132179	6.13971	1.20706	1.57668
CNAG_01234	-	spore wall assembly-associated protein	1416	2056	1379	2761	3314	3389	0.0164295	0.454324	0.00769054	7.10416	1.37014	1.78438
CNAG_01235	-	DNA-directed RNA polymerase II subunit RPB2, variant	13585	14664	14303	17351	17785	18287	0.0855622	-0.18025	0.0500244	3.84064	0.88255	1.06772
CNAG_01236	-	rRNA-processing protein EBP2	8100	7200	9341	7038	6005	7488	4.57e-10	-0.777089	5.41e-11	43.0226	0.583543	9.33964
CNAG_01237	-	hypothetical protein	568	571	505	758	652	861	0.772487	-0.0496746	0.702865	0.145509	0.966154	0.112109
CNAG_01238	-	arginine biosynthesis ArgJ, mitochondrial	5659	5134	5609	4834	4418	4905	2.06e-14	-0.722529	1.42e-15	63.7413	0.606034	13.6868
CNAG_01239	CDA3	Chitin deacetylase	2252	2223	1885	5346	5690	4805	2.57e-08	0.814977	3.98e-09	34.6333	1.75927	7.58986
CNAG_01240	-	hypothetical protein	711	603	879	1702	1551	2170	3.07244e-06	0.788015	6.63e-07	24.7209	1.7267	5.51252
CNAG_01241	SDS22	enzyme regulator	2992	2701	2712	3413	3345	3602	0.0504385	-0.207696	0.0274178	4.86431	0.865919	1.29724
CNAG_01242	HAPX	CCAAT-binding transcription factor HapX	1094	1163	1061	2164	2299	2669	3.59e-07	0.591131	6.62e-08	29.1726	1.50643	6.44434
CNAG_01243	SET101	histone-lysine N-methyltransferase, H3 lysine-4 specific	2684	3031	2918	3705	3320	3845	0.109329	-0.179814	0.0664738	3.36802	0.882817	0.961265
CNAG_01244	-	hypothetical protein, variant	4	10	7	86	62	89	4.06e-09	2.97792	5.51e-10	38.4874	7.87852	8.3911
CNAG_01245	-	hypothetical protein	2370	2884	2666	3108	3050	3304	0.0412566	-0.253945	0.0218939	5.2542	0.8386	1.38451
CNAG_01246	-	hypothetical protein, variant 2	965	964	1334	1556	1340	1516	0.697991	-0.075698	0.617319	0.249654	0.948883	0.15615
CNAG_01247	-	hypothetical protein	1494	1035	1387	1519	1329	1550	0.0364924	-0.343346	0.019013	5.50032	0.788211	1.4378
CNAG_01248	-	vacuole morphology and inheritance protein 14	2897	3139	3086	3598	3394	3522	0.00506955	-0.303737	0.00207133	9.48523	0.810151	2.29503
CNAG_01249	-	hypothetical protein	1846	2190	1774	2530	2513	2710	0.519577	-0.0941793	0.422471	0.64343	0.936805	0.28435
CNAG_01250	TRL1	tRNA ligase	4923	5397	4508	5142	4957	5370	5.70511e-05	-0.44909	1.53623e-05	18.692	0.732505	4.24374
CNAG_01251	UFD4	E3 ubiquitin-protein ligase TRIP12	5326	6254	5335	8662	8186	8941	0.44652	0.0978765	0.348466	0.879036	1.0702	0.350159
CNAG_01252	-	thiosulfate/3-mercaptopyruvate sulfurtransferase	194	265	183	507	541	560	4.11052e-05	0.814899	1.07956e-05	19.3652	1.75918	4.3861
CNAG_01253	-	mitochondrial import inner membrane translocase subunit TIM10	9346	6311	7734	7926	7286	9048	0.00241079	-0.460475	0.000919795	10.9824	0.726747	2.61784
CNAG_01254	OCA101	protein-tyrosine-phosphatase	473	390	444	862	758	798	0.0136088	0.379367	0.00623965	7.47976	1.30077	1.86618
CNAG_01255	-	hypothetical protein	4152	3315	3798	11640	8470	9447	2.67e-09	0.882825	3.52e-10	39.3606	1.84398	8.57339
CNAG_01256	-	hypothetical protein	566	610	477	1174	1083	1096	0.000809587	0.512605	0.000275735	13.2284	1.42662	3.09174
CNAG_01257	-	aldo-keto reductase	1741	1722	1464	4132	3601	4126	8.02e-11	0.755937	8.64e-12	46.6141	1.68873	10.0956
CNAG_01258	-	hypothetical protein	5290	5132	4930	8447	7588	7993	0.217134	0.137795	0.147399	2.09896	1.10022	0.663272
CNAG_01261	-	myosin I binding protein	6670	7573	4721	12355	11380	13893	0.00651794	0.474286	0.00274326	8.97082	1.38923	2.18589
CNAG_01262	GPB1	guanine nucleotide-binding protein subunit beta	1014	734	872	3110	2406	3192	5.34e-16	1.21811	3.18e-17	71.2307	2.32642	15.2724
CNAG_01263	-	vacuolar transporter chaperone 4	7150	6636	6630	7266	7491	7570	0.000206442	-0.378329	6.22651e-05	16.0325	0.769328	3.6852
CNAG_01264	-	homoisocitrate dehydrogenase	21204	18025	19136	18882	20176	21273	1.98197e-05	-0.460882	4.90559e-06	20.8738	0.726542	4.7029
CNAG_01265	VPS20	charged multivesicular body protein 6	1245	1167	1107	1040	1134	1262	9.70681e-06	-0.54554	2.27722e-06	22.3457	0.685135	5.01292
CNAG_01266	-	ATP-dependent protease La	6865	6602	5736	13731	12709	13376	1.38124e-06	0.543526	2.78e-07	26.3944	1.45753	5.85973
CNAG_01267	-	hypothetical protein	1358	1469	1364	1349	1255	1283	1.82e-07	-0.616881	3.19e-08	30.5893	0.652079	6.73938
CNAG_01268	-	hypothetical protein	17	28	32	65	54	61	0.115724	0.713228	0.0711164	3.25706	1.63947	0.936576
CNAG_01270	-	hypothetical protein	16607	16720	15312	19070	20932	20976	0.115269	-0.181354	0.0707405	3.26575	0.881875	0.938286
CNAG_01271	-	pre-mRNA-splicing factor isy1	4603	4894	4520	5512	5679	6187	0.0535421	-0.200428	0.0293945	4.74436	0.870293	1.2713
CNAG_01272	-	hypothetical protein	1596	912	1080	20482	13105	12900	1.87e-16	3.19238	1.04e-17	73.4289	9.14121	15.7284
CNAG_01273	-	cellular nucleic acid-binding protein	22832	16267	18856	18739	18277	18716	5.75107e-05	-0.563137	1.55214e-05	18.6724	0.676829	4.24025
CNAG_01274	-	coatomer subunit gamma	19344	18661	17678	22310	22584	23579	0.0343646	-0.210267	0.0177506	5.6206	0.864377	1.46389
CNAG_01275	-	hypothetical protein	2394	1981	2148	4149	3316	3218	0.212587	0.206791	0.14384	2.13639	1.15412	0.672464
CNAG_01276	SMC6	hypothetical protein	5979	5861	7824	9386	9265	9207	0.984345	-0.00438275	0.973816	0.00107735	0.996967	0.00685247
CNAG_01277	-	hypothetical protein	10517	8397	9648	16565	14411	15090	0.178756	0.182114	0.117413	2.4515	1.13455	0.747739
CNAG_01278	APT2	Aminophospholipid translocase, putative	4693	3638	4860	7002	6152	6899	0.550545	0.094415	0.454353	0.559769	1.06763	0.259207
CNAG_01279	-	ubiquitin-conjugating enzyme E2 S, variant	2541	2210	2298	1984	2160	2099	1.48e-08	-0.681365	2.2e-09	35.7905	0.623575	7.82995
CNAG_01281	-	hypothetical protein	801	581	911	1699	1588	1522	0.00251306	0.563708	0.000963447	10.8965	1.47806	2.5998
CNAG_01282	-	hypothetical protein	1924	2272	2168	2954	2940	3062	0.915214	-0.0162851	0.88213	0.021984	0.988776	0.0384775
CNAG_01283	CAP5	beta-1,2-xylosyltransferase	1679	1644	1984	1722	1650	1956	3.42201e-05	-0.507202	8.85692e-06	19.7434	0.703586	4.46572
CNAG_01284	-	ATPase	4663	4278	4073	6574	5941	6675	0.681659	0.0497761	0.598097	0.277876	1.0351	0.166433
CNAG_01285	IPL1	AUR protein kinase	3346	3232	3291	4470	4872	4544	0.936697	-0.0123482	0.909401	0.0129491	0.991477	0.0284009
CNAG_01286	-	hypothetical protein, variant	473	362	441	778	789	817	0.013842	0.393826	0.00635681	7.44627	1.31387	1.8588
CNAG_01287	-	NADH-ubiquinone oxidoreductase 51 kDa subunit, mitochondrial	42542	35421	38361	41403	40321	45861	0.000257766	-0.377634	7.92346e-05	15.5765	0.769699	3.58877
CNAG_01288	-	solute carrier family 25, member 33/36	3642	3226	3623	5475	5242	5800	0.181695	0.144625	0.119678	2.42153	1.10544	0.740657
CNAG_01289	-	hypothetical protein	512	400	645	1182	823	1071	0.0272667	0.468572	0.0136511	6.08272	1.38374	1.56437
CNAG_01290	-	hypothetical protein	118	103	147	283	292	314	0.000496318	0.762693	0.000161778	14.2299	1.69665	3.30424
CNAG_01291	-	hypothetical protein	907	689	695	1340	1112	1575	0.0805963	0.296377	0.0467984	3.95262	1.22806	1.09369
CNAG_01292	-	pol II transcription elongation factor	1139	1239	1284	2291	2274	2452	0.0001385	0.428088	4.03595e-05	16.8544	1.34545	3.85855
CNAG_01293	-	hypothetical protein	2078	2418	2232	3903	3822	4031	0.0107286	0.295642	0.00478979	7.95714	1.22743	1.96946
CNAG_01294	IPK1	inositol-pentakisphosphate 2-kinase, variant	1357	1296	1421	3990	3980	4241	5.53e-27	1.07435	1.44e-28	122.943	2.10577	26.257
CNAG_01295	-	acyl carrier protein, variant	1970	1381	1580	1963	1960	2388	0.358408	-0.156937	0.266305	1.23568	0.896927	0.445622
CNAG_01296	-	RNA polymerase I-specific transcription initiation factor RRN3	205	232	214	318	281	317	0.936962	-0.0186254	0.909774	0.0128422	0.987173	0.0282778
CNAG_01297	-	hypothetical protein, variant 2	1035	1120	1093	1204	1145	1330	0.00354825	-0.332659	0.001407	10.1966	0.794072	2.44999
CNAG_01298	-	lysophospholipase NTE1	5952	5835	5431	8570	8007	8530	0.770738	0.0351148	0.700611	0.147838	1.02464	0.113093
CNAG_01299	-	hypothetical protein, variant	17	7	18	100	58	59	0.000384129	1.86446	0.000122092	14.7601	3.64131	3.41552
CNAG_01300	-	small subunit ribosomal protein S21e	84469	56071	67069	53694	50561	60232	1.14e-08	-0.847549	1.65e-09	36.3478	0.555728	7.94435
CNAG_01301	-	hypothetical protein	1043	966	1011	1301	1416	1420	0.715053	-0.0535618	0.637156	0.222481	0.963555	0.145662
CNAG_01302	-	hypothetical protein	4664	3333	3554	5350	4626	6097	0.836258	-0.0383822	0.780734	0.077486	0.973746	0.0776597
CNAG_01303	-	hypothetical protein, variant	2312	2045	2306	3036	2748	2980	0.356178	-0.113879	0.263948	1.24793	0.9241	0.448332
CNAG_01304	-	polynucleotide 5'-hydroxyl-kinase GRC3	4048	3737	3857	3172	3150	3151	5.38e-15	-0.804505	3.47e-16	66.5162	0.572558	14.2695
CNAG_01305	-	methionine-tRNA ligase	14578	15929	15617	14564	15191	16151	1.39e-07	-0.516607	2.38e-08	31.1563	0.699014	6.85793
CNAG_01306	-	chromodomain-helicase-DNA-binding protein 3, variant	1117	1279	1209	2525	2389	2407	2.75826e-05	0.514204	7.02027e-06	20.1877	1.42821	4.55937
CNAG_01307	-	endoplasmic reticulum protein	4182	4026	3744	7393	6474	7756	0.000619013	0.342575	0.000206186	13.7739	1.26802	3.2083
CNAG_01308	-	protein NRD1	2057	1906	1797	3297	2677	3356	0.146041	0.182078	0.093062	2.82059	1.13452	0.835526
CNAG_01309	-	arf/Sar family protein	3459	2865	3140	2538	2552	2757	2.07e-12	-0.779643	1.76e-13	54.2599	0.582511	11.6839
CNAG_01310	-	Nucleolar protein	2113	2052	2215	1947	1920	2136	1.47e-09	-0.598709	1.86e-10	40.6052	0.660344	8.8315
CNAG_01313	-	hypothetical protein	1100	1115	1160	2260	2218	2399	6.44e-07	0.5169	1.23e-07	27.9679	1.43088	6.19091
CNAG_01314	PPP1	vacuolar protein, variant	2738	2590	2763	4376	4269	4921	0.0155989	0.233716	0.00725763	7.20807	1.17586	1.80691
CNAG_01315	VPS5	protein transporter	2903	3108	3155	4396	4287	5098	0.515567	0.0749361	0.418324	0.65502	1.05331	0.287715
CNAG_01316	RPA32/RFA2	replication factor A2	1870	1628	2106	2934	2349	3113	0.681871	0.0677849	0.598443	0.277351	1.04811	0.166298
CNAG_01317	CBF1	hypothetical protein	2172	2100	2049	2632	2460	3234	0.335019	-0.118826	0.24522	1.35034	0.920936	0.47493
CNAG_01318	-	sodium/hydrogen exchanger 3	3944	3616	3956	5758	5553	5777	0.607864	0.061142	0.515261	0.423369	1.04329	0.216194
CNAG_01319	PAC2	Microtubule effector PAC2, putative	2372	2404	2399	2320	2638	2739	0.000408851	-0.40776	0.000130804	14.6302	0.753793	3.38843
CNAG_01320	-	large subunit ribosomal protein L17	7322	6997	6885	7145	7352	7841	3.23496e-06	-0.43423	7e-07	24.615	0.740089	5.49013
CNAG_01321	-	acyl carrier protein	18024	15144	14849	18168	17448	20067	0.0083177	-0.297581	0.00361119	8.46966	0.813616	2.08
CNAG_01322	-	hypothetical protein	4042	4342	3961	5870	5696	6535	0.731331	0.0400387	0.654988	0.199669	1.02814	0.135886
CNAG_01323	-	ubiquinol-cytochrome c reductase subunit 7	39237	28812	30444	32696	29359	34423	5.82213e-05	-0.540979	1.57419e-05	18.6455	0.687304	4.23492
CNAG_01324	-	hypothetical protein	599	539	631	1259	1238	1335	1.40273e-06	0.605558	2.84e-07	26.3563	1.52157	5.85303
CNAG_01325	SPC19	DASH complex subunit SPC19	1279	1058	1114	1280	1298	1380	0.0166235	-0.311147	0.00779362	7.08029	0.806	1.77928
CNAG_01330	-	hypothetical protein	3373	3552	3248	3943	3946	4261	0.0134564	-0.253864	0.00615983	7.50294	0.838647	1.87107
CNAG_01331	-	hypothetical protein	940	793	1002	979	882	1248	0.034742	-0.333254	0.0179626	5.59979	0.793744	1.45914
CNAG_01332	-	small subunit ribosomal protein S24e	129883	92970	107178	92381	89782	98199	2.1e-08	-0.744315	3.21e-09	35.0546	0.596951	7.67756
CNAG_01333	ALK1	HASPIN protein kinase	1360	1239	1285	1645	1863	1576	0.499626	-0.113387	0.402062	0.70215	0.924415	0.301355
CNAG_01334	-	hypothetical protein	4506	5066	4213	6464	6660	6607	0.952354	0.00995354	0.92952	0.00782328	1.00692	0.0212018
CNAG_01335	-	hypothetical protein	1559	1100	1448	2330	1894	1992	0.641779	0.0907862	0.553794	0.350564	1.06495	0.192614
CNAG_01336	-	hypothetical protein	94	97	123	194	216	227	0.0360642	0.51077	0.0187704	5.52278	1.42481	1.44292
CNAG_01337	BUN62	WD-repeat protein, variant	1210	1550	1275	2352	2304	2665	0.012603	0.34647	0.00572117	7.63609	1.27145	1.89953
CNAG_01338	-	xeroderma pigmentosum group C-complementing protein	858	1287	959	1527	1407	1916	0.547303	0.124834	0.450938	0.568293	1.09038	0.261772
CNAG_01339	-	cytoplasmic protein	8275	8180	7828	9944	10343	10501	0.118009	-0.16538	0.0728526	3.21755	0.891694	0.928085
CNAG_01340	-	ATPase	7352	8056	6911	11060	11189	11218	0.559409	0.0768582	0.463526	0.537368	1.05472	0.252271
CNAG_01341	ISP3	mannose-6-phosphate isomerase, variant	983	1137	747	1586	1215	1053	0.774377	-0.0757641	0.705632	0.142679	0.948839	0.111048
CNAG_01342	-	hypothetical protein	1821	2292	1993	2468	2539	2798	0.270109	-0.157308	0.18987	1.71863	0.896697	0.568461
CNAG_01343	CLPX	ATP-dependent Clp protease ATP-binding subunit ClpX	788	911	817	868	847	983	0.00147045	-0.411944	0.000535711	11.9871	0.75161	2.83255
CNAG_01344	-	hypothetical protein	1077	1067	948	800	761	729	5.4e-12	-0.939308	4.83e-13	52.273	0.521483	11.2674
CNAG_01345	-	small subunit ribosomal protein S2	1003	914	820	1048	1197	1207	0.27076	-0.172943	0.190461	1.71405	0.887031	0.567415
CNAG_01346	HPP2	hypothetical protein	2564	1830	2024	3911	3978	4473	0.00290666	0.435515	0.00113436	10.5943	1.35239	2.53661
CNAG_01347	-	co-chaperone	4716	5480	4811	3386	3554	4249	7.82e-16	-0.937762	4.73e-17	70.4457	0.522042	15.1068
CNAG_01348	-	cyanate hydratase, variant	2737	2194	2383	6909	4814	4342	0.00129564	0.633035	0.000464218	12.2542	1.55082	2.88752
CNAG_01349	-	hypothetical protein	4	5	5	19	8	7	0.47431	0.776896	0.375634	0.784941	1.71344	0.323937
CNAG_01350	RMD5	putative ubiquitin ligase	1557	1768	1680	3522	3417	4191	5.66e-09	0.638391	7.85e-10	37.7967	1.55659	8.2471
CNAG_01351	-	hypothetical protein	3195	2694	2936	2517	2478	2539	6.25e-11	-0.735723	6.63e-12	47.135	0.600517	10.204
CNAG_01352	RAD9	hypothetical protein	3253	3836	4190	3737	3550	3916	4.35165e-05	-0.520732	1.14503e-05	19.2528	0.697018	4.36135
CNAG_01353	-	hypothetical protein	1631	1491	1683	1638	1380	1535	8.67e-07	-0.587704	1.69e-07	27.3561	0.665401	6.06212
CNAG_01354	-	hypothetical protein	8663	5033	8089	9652	8780	8798	0.397599	-0.183374	0.302807	1.06179	0.880641	0.400555
CNAG_01355	-	thioredoxin	3235	3092	3115	4246	4466	4764	0.979823	0.0037086	0.967852	0.00162426	1.00257	0.00885231
CNAG_01356	-	hypothetical protein	1641	1688	1654	3304	2944	3365	1.00399e-05	0.436523	2.37141e-06	22.2679	1.35334	4.99827
CNAG_01357	SDP101	hypothetical protein	692	628	637	1650	1372	1536	2.09e-08	0.709667	3.18e-09	35.0699	1.63543	7.68063
CNAG_01358	-	hypothetical protein	42	47	68	78	91	128	0.302877	0.399996	0.217336	1.52188	1.3195	0.518733
CNAG_01359	-	DNA-directed RNA polymerase II subunit RPB7	8219	6354	9053	8633	10550	14781	0.990145	0.00373511	0.982962	0.000456057	1.00259	0.00430121
CNAG_01360	-	pumilio domain-containing protein c	4310	5430	4274	8421	7791	8864	0.0142046	0.327289	0.00654776	7.39302	1.25465	1.84757
CNAG_01361	-	importin alpha subunit	31903	27562	28632	23218	23417	24650	2.19e-16	-0.813955	1.24e-17	73.0845	0.56882	15.6602
CNAG_01362	-	cell cycle control protein cwf19	4682	5013	4943	5989	6019	6772	0.135407	-0.152095	0.0852601	2.96167	0.899943	0.868358
CNAG_01363	-	XPA-binding protein 1	2232	2271	2359	3235	3390	3479	0.692997	0.0498116	0.611538	0.257941	1.03513	0.159269
CNAG_01364	-	Guanylate kinase	13239	10425	10910	9446	9239	9855	3.68e-11	-0.785187	3.78e-12	48.2365	0.580277	10.4342
CNAG_01365	-	hypothetical protein	3069	3015	2642	5046	5598	5252	0.00577446	0.360047	0.00239058	9.22251	1.28347	2.23849
CNAG_01367	-	hypothetical protein	256	483	344	617	618	1026	0.0501297	0.534307	0.0272129	4.87725	1.44825	1.29991
CNAG_01368	-	hypothetical protein, variant	21	79	69	26	44	90	0.338167	-0.618354	0.247924	1.33497	0.651414	0.470869
CNAG_01369	-	hypothetical protein, variant	271	456	302	280	309	336	0.00539117	-0.665997	0.00221467	9.36252	0.630253	2.26832
CNAG_01370	-	hypothetical protein	229	152	178	1027	863	893	8.62e-22	1.80897	3.18e-23	98.5443	3.50393	21.0647
CNAG_01371	CRG2	Putative regulator of G-protein signaling protein	2104	2168	1944	2372	2520	2713	0.061085	-0.219177	0.0341739	4.48598	0.859056	1.21407
CNAG_01372	-	hypothetical protein	2942	2547	2794	3421	2995	3197	0.0133495	-0.293702	0.00609208	7.52286	0.815806	1.87454
CNAG_01373	CDC10	septin ring protein	3089	2786	3125	4366	4494	4668	0.516847	0.0796093	0.419807	0.650855	1.05673	0.286638
CNAG_01375	ABP1	Putative actin-binding protein	3459	3761	2687	5523	5665	6106	0.0539132	0.29361	0.0296579	4.72901	1.2257	1.2683
CNAG_01376	-	stress response protein NST1, variant	15394	16844	14091	14578	14534	16039	2.95e-07	-0.548061	5.37e-08	29.5782	0.683939	6.52969
CNAG_01377	UBP13	PAB-dependent poly(A)-specific ribonuclease subunit PAN2	5392	5521	5548	5740	5453	5960	3.9e-07	-0.450787	7.22e-08	29.0048	0.731644	6.40932
CNAG_01378	STE24	STE24 endopeptidase	5122	5095	4823	8163	7815	8768	0.0252382	0.207388	0.0125151	6.23639	1.1546	1.59794
CNAG_01379	-	hypothetical protein	1913	1206	1601	1624	1333	1691	0.00265946	-0.535159	0.00102611	10.7798	0.690083	2.57521
CNAG_01380	-	Phosphatidylserine decarboxylase	1439	1316	1412	2835	2593	2659	9.36013e-05	0.448992	2.63552e-05	17.6641	1.36509	4.02872
CNAG_01381	-	hypothetical protein	3111	2870	2680	2813	2765	3033	8.65e-07	-0.51845	1.69e-07	27.3612	0.698121	6.06299
CNAG_01382	-	aspartyl-tRNA(Asn)/glutamyl-tRNA (Gln) amidotransferase subunit A	1392	1570	1231	2912	2814	3048	1.55233e-05	0.555007	3.783e-06	21.3718	1.46918	4.80902
CNAG_01383	-	hypothetical protein	8	7	22	25	23	46	0.268543	0.815154	0.188637	1.72823	1.75949	0.570986
CNAG_01384	-	hypothetical protein	88	81	71	410	412	482	2.72e-23	1.92941	8.98e-25	105.608	3.80899	22.566
CNAG_01385	GGT1	Glycosylinositolphosphoceramide galactosyltransferase	3656	3514	3245	10055	9652	10181	7.34e-25	1.01217	2.18e-26	112.976	2.01694	24.1344
CNAG_01386	-	phosphatidylinositol glycan, class P	209	199	179	359	287	353	0.204848	0.254203	0.137598	2.20462	1.19268	0.688568
CNAG_01387	-	hypothetical protein	1559	2537	1579	2102	2676	3233	0.947969	-0.0193739	0.923375	0.00925123	0.986661	0.023206
CNAG_01388	-	hypothetical protein	2468	2278	2031	3020	2770	3336	0.531312	-0.0836377	0.434431	0.610948	0.943675	0.27465
CNAG_01389	-	hypothetical protein	1503	1607	1283	2208	2297	2010	0.719751	0.0653952	0.642581	0.215382	1.04637	0.142818
CNAG_01390	-	adenine phosphoribosyltransferase	14465	11522	12386	7774	9283	9491	3.83e-15	-1.0392	2.43e-16	67.2212	0.486597	14.4174
CNAG_01391	-	cell division cycle protein 37	3264	5054	3602	4322	6437	7660	0.668967	0.111161	0.583835	0.300076	1.0801	0.174595
CNAG_01392	-	hypothetical protein	1175	1206	1155	1139	1055	1268	4.76e-07	-0.543729	8.96e-08	28.5873	0.685995	6.3223
CNAG_01395	-	Ribose-5-phosphate isomerase	6523	5760	5895	8094	7582	8855	0.472158	-0.0794908	0.373697	0.791334	0.946392	0.325913
CNAG_01396	-	protein SUS1	1708	1220	1308	1636	1449	1937	0.105415	-0.270004	0.0636921	3.43854	0.829317	0.977099
CNAG_01397	-	mitochondrial import inner membrane translocase subunit	15260	13138	13749	12277	12250	13026	1.25e-11	-0.675286	1.18e-12	50.5164	0.626208	10.9032
CNAG_01398	-	ATP-dependent RNA helicase DOB1	7830	6995	7855	6059	5809	5862	2.68e-16	-0.862277	1.53e-17	72.6695	0.550084	15.5726
CNAG_01399	-	hypothetical protein	2361	2002	2248	3719	3502	4075	0.0184731	0.261171	0.00876526	6.87004	1.19845	1.73346
CNAG_01400	-	3-deoxy-7-phosphoheptulonate synthase	24652	22039	23985	24491	24755	25910	1.43147e-05	-0.419743	3.46032e-06	21.5427	0.747558	4.84422
CNAG_01401	-	hypothetical protein	29	11	26	64	80	94	0.00378278	1.33863	0.00150884	10.0678	2.52912	2.42219
CNAG_01402	ARP3	actin binding protein	7823	7734	7051	11006	11095	12828	0.289226	0.115328	0.206118	1.59849	1.08322	0.538762
CNAG_01403	ERP4	eclair-PA	4164	4126	3828	4965	5083	6747	0.754974	-0.0465155	0.681825	0.168079	0.968272	0.122068
CNAG_01404	-	hsp71-like protein	51573	39141	39095	39869	36527	37790	4.23e-07	-0.691995	7.88e-08	28.8349	0.618997	6.3741
CNAG_01405	-	hypothetical protein	2606	2975	2329	4257	4177	4389	0.174461	0.187691	0.11418	2.49539	1.13894	0.758301
CNAG_01406	-	hypothetical protein	1190	993	1266	1419	1248	1424	0.0626189	-0.264459	0.0351014	4.44024	0.832511	1.20329
CNAG_01408	-	PH and SEC7 domain-containing protein	3031	3542	3367	3284	3232	3691	1.59441e-05	-0.474054	3.89928e-06	21.3137	0.719939	4.7974
CNAG_01411	-	hypothetical protein	294	246	333	914	785	812	2.36e-09	1.01662	3.09e-10	39.6167	2.02317	8.62628
CNAG_01412	PAH1	phosphatidate phosphatase LPIN	3380	3949	2934	4724	4665	6083	0.662527	0.0750898	0.575852	0.312989	1.05343	0.178797
CNAG_01413	PUB1	nucleolysin TIA-1/TIAR	21656	17689	16164	21399	19642	23493	0.0272697	-0.294977	0.0136633	6.08113	0.815085	1.56432
CNAG_01414	-	hypothetical protein	5108	5026	4728	6119	6205	7124	0.238888	-0.124032	0.164692	1.9306	0.917619	0.621806
CNAG_01415	-	cytoplasmic protein	3478	4131	3171	3148	3634	3963	0.000374589	-0.516047	0.000118617	14.8146	0.699285	3.42645
CNAG_01416	-	hypothetical protein	5192	4039	4704	5141	5112	5306	0.00606403	-0.348606	0.00252985	9.11888	0.785343	2.21724
CNAG_01417	-	hypothetical protein	207	416	143	355	324	370	0.888775	-0.0603816	0.84703	0.0372139	0.95901	0.0512081
CNAG_01418	-	hypothetical protein	1456	1272	1406	1903	1741	2361	0.892283	0.021687	0.851361	0.0351121	1.01515	0.0494972
CNAG_01419	-	hypothetical protein	1354	1856	1495	2787	2910	3157	0.00830498	0.400879	0.00360362	8.47348	1.32031	2.08066
CNAG_01420	-	hypothetical protein	956	867	826	2268	1766	2077	1.77e-07	0.694639	3.09e-08	30.65	1.61848	6.75173
CNAG_01421	-	hypothetical protein	16489	12712	14336	26472	22952	23607	0.089605	0.23954	0.0527626	3.75142	1.18062	1.04767
CNAG_01422	-	endoplasmic reticulum protein	1740	1953	1760	5273	5447	5726	2.96e-24	1.08318	9.43e-26	110.076	2.1187	23.5286
CNAG_01423	-	hypothetical protein	4137	4915	4467	5850	6179	6595	0.731434	-0.0480748	0.65517	0.199444	0.967226	0.135825
CNAG_01424	-	hypothetical protein	1033	1246	1017	1836	1824	2383	0.014803	0.357366	0.00685457	7.31069	1.28108	1.82965
CNAG_01425	-	hypothetical protein	673	521	571	1011	968	1141	0.0364924	0.309959	0.0190131	5.50031	1.23967	1.4378
CNAG_01426	VPS26	vacuolar protein sorting 26, variant 2	4662	4298	4035	4772	4516	5353	0.000932738	-0.340535	0.000322267	12.9363	0.789748	3.03024
CNAG_01428	-	Translation initiation factor 5A	105074	84062	77225	79855	73731	70933	1.93e-07	-0.751267	3.41e-08	30.4608	0.594082	6.71455
CNAG_01429	-	hypothetical protein	679	634	663	855	748	850	0.138536	-0.198967	0.0876051	2.91784	0.871174	0.858436
CNAG_01430	-	hypothetical protein	1008	1237	1377	1638	1456	1798	0.64528	-0.0809983	0.557529	0.344	0.945403	0.190252
CNAG_01431	HOB1	hypothetical protein	452	507	525	656	632	800	0.902537	-0.0227332	0.865583	0.0286528	0.984366	0.0445351
CNAG_01432	RSA4?	ribosome assembly protein 4, variant	5944	5545	6004	4624	4429	4270	4.48e-16	-0.898553	2.65e-17	71.5885	0.536424	15.3485
CNAG_01435	-	serine-tRNA ligase	25423	21864	23482	20920	21431	23529	5.37e-10	-0.61329	6.41e-11	42.6901	0.653704	9.26987
CNAG_01436	SIT4	serine/threonine-protein phosphatase 6 catalytic subunit	1440	1274	1554	1536	1452	1645	0.0013769	-0.392605	0.000496891	12.1273	0.761753	2.8611
CNAG_01437	-	ribosomal RNA assembly protein	5719	4863	5931	5020	4613	4693	4.2e-09	-0.712002	5.71e-10	38.4167	0.610472	8.37656
CNAG_01438	SWI6	Cell-cycle box factor subunit SWI6, putative	2564	2126	2839	3390	3266	3121	0.440304	-0.128135	0.341882	0.903363	0.915013	0.356247
CNAG_01439	PRP4	U4/U6 small nuclear ribonucleoprotein PRP4	3822	3940	3986	3996	4222	4807	0.000374914	-0.363215	0.000118794	14.8117	0.77743	3.42607
CNAG_01440	-	hypothetical protein	936	1119	856	1259	1217	1477	0.670479	-0.072906	0.58569	0.297126	0.950721	0.173615
CNAG_01441	-	hypothetical protein, variant	2629	2248	2713	6705	5665	5249	2.00761e-06	0.711234	4.18e-07	25.6075	1.6372	5.69732
CNAG_01442	-	cysteine desulfurase IscS	6088	5180	5303	8057	7343	8082	0.965057	-0.00669058	0.946501	0.00450264	0.995373	0.0154472
CNAG_01443	-	hypothetical protein	948	842	803	678	580	741	1.88e-11	-0.889582	1.82e-12	49.674	0.539771	10.7268
CNAG_01444	RPB4	DNA-directed RNA polymerase II subunit RPB4	1912	1512	1743	1868	1684	1901	0.000662268	-0.432526	0.000221587	13.6386	0.740964	3.17897
CNAG_01445	APG9	autophagy-like protein 9	627	745	601	1752	1486	1478	1.3548e-06	0.749997	2.73e-07	26.434	1.68179	5.86813
CNAG_01446	HSP12	heat shock protein, 12Kda	19655	16209	12052	50812	26624	22050	0.29671	0.554734	0.212254	1.55599	1.4689	0.527668
CNAG_01448	-	hypothetical protein	1939	2392	1990	3097	2670	3486	0.840152	0.0332915	0.785402	0.0741399	1.02334	0.0756423
CNAG_01451	-	hypothetical protein	3644	2942	2794	3366	3114	3716	0.00296616	-0.39189	0.00116102	10.5514	0.76213	2.52781
CNAG_01452	MAT3	mat3 pheromone repeat protein	442	334	438	425	335	446	0.00450536	-0.52425	0.00182253	9.7202	0.69532	2.34627
CNAG_01454	STE12alpha	transcription factor STE12	3744	3779	3916	5655	5603	6179	0.342634	0.0975636	0.25193	1.31257	1.06996	0.46517
CNAG_01455	RPL39alpha	large subunit ribosomal protein L39	69404	42158	50210	36200	33157	37570	5.47e-11	-1.10673	5.75e-12	47.4128	0.464345	10.262
CNAG_01456	-	hypothetical protein, variant	70	53	71	26	40	59	0.00467731	-1.15475	0.00189784	9.64581	0.449143	2.33
CNAG_01457	BSP1	hypothetical protein	1953	2248	2210	3236	3349	3414	0.311069	0.13272	0.224663	1.47433	1.09636	0.507143
CNAG_01461	-	sodium/bile acid cotransporter 7-B/bile acid cotransporter 7-B	1196	1058	1326	1683	1524	1896	0.990145	-0.00257221	0.982836	0.000462852	0.998219	0.00430121
CNAG_01463	-	hypothetical protein	869	690	711	1134	1096	1383	0.326003	0.156167	0.237538	1.39515	1.11432	0.486779
CNAG_01464	FHB1	Flavohemoglobin	3421	14800	2379	17512	18078	26585	0.267919	1.06664	0.188166	1.73192	2.09455	0.571997
CNAG_01465	-	5' flap endonuclease	318	337	293	562	535	569	0.0565435	0.303841	0.0313134	4.6357	1.23443	1.24762
CNAG_01466	-	hypothetical protein	731	908	792	1241	1189	1459	0.282325	0.163089	0.200158	1.64122	1.11968	0.549251
CNAG_01467	-	solute carrier family 35, member F5	1052	831	1022	1416	1268	1516	0.909494	0.0196748	0.874716	0.0248604	1.01373	0.0412002
CNAG_01468	-	hypothetical protein	443	358	351	499	287	465	0.0847617	-0.400012	0.0495043	3.85817	0.757852	1.0718
CNAG_01469	-	CDP-diacylglycerol-serine O- phosphatidyltransferase	2673	1948	2263	3130	2698	3179	0.439059	-0.123374	0.340539	0.908402	0.918038	0.357477
CNAG_01470	-	NADH dehydrogenase (ubiquinone) flavoprotein 2	17530	14432	14005	17687	17766	18033	0.0232999	-0.288402	0.0114279	6.39753	0.818808	1.63265
CNAG_01471	-	hypothetical protein	5962	4840	4997	5763	5112	6117	0.00051841	-0.407155	0.000169808	14.1388	0.754109	3.28533
CNAG_01472	-	endoplasmic reticulum protein	1311	1511	1478	1735	1700	2084	0.241904	-0.154571	0.167227	1.90763	0.8984	0.616357
CNAG_01473	-	hypothetical protein	166	214	169	83	63	94	7.12e-12	-1.71203	6.49e-13	51.6938	0.30523	11.1473
CNAG_01474	-	hypothetical protein	898	660	918	2356	1918	2172	4.06e-08	0.870658	6.47e-09	33.6878	1.8285	7.3914
CNAG_01475	SMT1	sphingolipid C9-methyltransferase	16446	14667	15628	19109	17818	20504	0.0225544	-0.214267	0.0110096	6.46377	0.861984	1.64677
CNAG_01476	-	hypothetical protein	2827	3457	3213	3073	3249	4012	0.00333211	-0.39374	0.0013131	10.324	0.761154	2.47728
CNAG_01477	-	Serine palmitoyltransferase	6255	5160	6018	8679	7307	8124	0.777358	-0.0417092	0.708827	0.139451	0.971503	0.109379
CNAG_01478	-	monooxygenase	825	1104	856	1418	1537	1794	0.130896	0.256029	0.0820657	3.02351	1.19419	0.883072
CNAG_01479	-	hypothetical protein	1591	2021	1444	1486	1892	2196	0.0474892	-0.373569	0.0256043	4.98254	0.771871	1.32341
CNAG_01480	-	large subunit ribosomal protein L12	120538	91714	99099	91640	89820	84738	8.04e-08	-0.730152	1.34e-08	32.2737	0.60284	7.09486
CNAG_01481	-	hypothetical protein	183	204	212	330	249	317	0.778077	0.0668359	0.709578	0.138699	1.04742	0.108977
CNAG_01482	-	solute carrier family 25 (mitochondrial phosphate transporter), member 23/24/25/41	3871	4370	4261	4526	4517	4742	0.000627169	-0.368385	0.000209056	13.7479	0.774649	3.20262
CNAG_01483	HPI1	E3 ubiquitin ligase-like protein	1692	1915	1751	2573	2417	2740	0.902353	0.0170574	0.865296	0.0287766	1.01189	0.0446235
CNAG_01485	-	D-lactate dehydrogenase (cytochrome)	7642	6664	7194	5931	5033	5136	1.36e-14	-0.924169	9.13e-16	64.6092	0.526984	13.8679
CNAG_01486	-	large subunit ribosomal protein L15-A	170147	130581	144256	117534	111371	118989	5.1e-13	-0.863422	4.04e-14	57.1483	0.549647	12.2928
CNAG_01487	-	hypothetical protein	181	115	174	156	80	138	0.00715711	-0.848415	0.00304835	8.7783	0.555395	2.14526
CNAG_01489	CAS9	maltose O-acetyltransferase	146	70	81	64	64	79	0.0047311	-1.03266	0.0019241	9.62057	0.488809	2.32504
CNAG_01490	-	hypothetical protein, variant	536	372	438	1119	979	891	0.000691644	0.648148	0.000232249	13.5503	1.56715	3.16012
CNAG_01491	-	hypothetical protein	2164	2082	2029	3061	2987	3372	0.499583	0.0749007	0.40173	0.703141	1.05329	0.301392
CNAG_01492	-	hypothetical protein	20734	16820	16581	32506	29299	31511	0.0295181	0.27705	0.0149242	5.9254	1.21171	1.52991
CNAG_01493	-	hypothetical protein, variant	432	1065	331	566	465	713	0.356888	-0.592669	0.264649	1.24427	0.663115	0.447468
CNAG_01494	-	hypothetical protein, variant	675	591	742	184	160	155	3.04e-47	-2.51553	3.55e-49	217.278	0.174884	46.5172
CNAG_01495	-	myo-inositol 2-dehydrogenase	1092	1179	1167	1252	1082	1280	0.000148886	-0.440544	4.36609e-05	16.7052	0.736856	3.82715
CNAG_01496	PPT1	protein phosphatase 5	6638	7056	5770	6238	6897	6789	0.000206416	-0.473437	6.22319e-05	16.0335	0.720247	3.68526
CNAG_01497	-	Integral membrane protein	208	238	285	282	215	330	0.136291	-0.342128	0.0859135	2.94932	0.788877	0.865534
CNAG_01498	AKP2	Arylsulfatase	1255	1395	1357	1878	1960	2147	0.614132	0.067893	0.522612	0.408735	1.04818	0.211739
CNAG_01499	-	hypothetical protein, variant	299	292	408	532	622	731	0.0492375	0.4025	0.026668	4.91218	1.3218	1.3077
CNAG_01500	-	Taurine dioxygenase	2	1	5	2	8	7	0.711247	0.582278	0.632318	0.22893	1.49721	0.14798
CNAG_01501	-	hypothetical protein	652	478	564	926	823	988	0.289359	0.180143	0.206354	1.59682	1.133	0.538564
CNAG_01502	-	major facilitator superfamily transporter	2398	2304	2408	2677	2507	2945	0.000823311	-0.319152	0.000281219	13.1915	0.801541	3.08444
CNAG_01504	-	hypothetical protein	1673	1688	1607	1850	1754	2269	0.0177045	-0.274442	0.008357	6.95533	0.82677	1.75192
CNAG_01506	-	hypothetical protein	62	50	67	1627	1292	1586	1.1e-121	4.14065	1.49e-124	563.45	17.6384	120.957
CNAG_01507	-	protein CGI121	1522	1339	1499	1712	1563	2129	0.121708	-0.20738	0.0754374	3.16056	0.866109	0.914679
CNAG_01508	-	hypothetical protein	3797	4365	3902	7517	7832	7855	0.000154204	0.435767	4.53529e-05	16.6331	1.35263	3.8119
CNAG_01509	-	hypothetical protein	1490	1456	1451	1101	1162	1104	1.02e-13	-0.891073	7.6e-15	60.4375	0.539213	12.9924
CNAG_01510	-	hypothetical protein	5971	6231	5837	7487	7163	7541	0.0367478	-0.210119	0.0191624	5.48664	0.864466	1.43477
CNAG_01511	-	hypothetical protein	23	24	40	88	56	56	0.141236	0.694368	0.0895031	2.88329	1.61818	0.850055
CNAG_01512	-	hypothetical protein, variant	692	475	760	5763	4378	5034	4.3e-41	2.46751	5.71e-43	188.836	5.5309	40.3668
CNAG_01513	-	hypothetical protein	603	473	648	1757	1464	1827	5.31e-12	1.03662	4.73e-13	52.3123	2.05142	11.2749
CNAG_01514	-	hypothetical protein	0	0	0	11	4	2	0.0432676	4.45239	0.0230675	5.16341	21.8929	1.36384
CNAG_01518	PMU1	phosphoglycerate mutase, variant	1396	1576	1392	1751	1780	1958	0.149535	-0.180133	0.0956265	2.77701	0.882622	0.825258
CNAG_01519	EEP1	endonuclease/exonuclease/phosphatase	437	455	349	1277	1282	1486	2.18e-16	1.19219	1.23e-17	73.1031	2.28499	15.6624
CNAG_01520	-	histone-arginine methyltransferase CARM1	1872	1703	1913	3405	3098	3512	0.000655245	0.356914	0.00021906	13.6601	1.28068	3.1836
CNAG_01521	-	metallo-beta-lactamase	938	639	581	905	882	1052	0.606973	-0.11613	0.514078	0.425757	0.922659	0.21683
CNAG_01522	-	phenylalanine-tRNA ligase	5998	4821	4764	7598	5631	8347	0.788045	-0.0490999	0.721576	0.126988	0.966539	0.103449
CNAG_01523	HOG1	putative mitogen-activated protein kinase HOG1	11184	10458	10596	11596	11263	12044	1.09332e-05	-0.394591	2.59585e-06	22.0943	0.760705	4.96125
CNAG_01524	-	hypothetical protein	1975	1536	2246	2350	1920	3394	0.623094	-0.113015	0.532844	0.388965	0.924653	0.205446
CNAG_01525	-	hypothetical protein	133	159	157	329	246	371	0.0109292	0.55555	0.00488611	7.92112	1.46973	1.96141
CNAG_01526	-	cleavage and polyadenylation specificity factor subunit 4	5463	7424	5513	7953	7605	9192	0.615055	-0.0870148	0.523701	0.406599	0.941469	0.211086
CNAG_01527	-	hypothetical protein	9	5	2	781	615	733	1.01e-108	6.54415	1.87e-111	503.246	93.3221	107.994
CNAG_01528	-	hypothetical protein	3143	2699	2824	2075	2194	2218	3.75e-16	-0.925209	2.2e-17	71.958	0.526604	15.4262
CNAG_01529	-	solute carrier family 25 (mitochondrial phosphate transporter), member 23/24/25/41	2036	2134	1776	1122	914	1373	2.06e-20	-1.32276	8.14e-22	92.1255	0.399768	19.6859
CNAG_01530	MGA2	suppressor protein SPT23	4447	5144	4392	8600	7308	8616	0.0120266	0.297842	0.00544029	7.72694	1.2293	1.91986
CNAG_01531	SRS2	DNA helicase II/ATP-dependent DNA helicase PcrA	1033	1455	1340	1972	1855	1959	0.641608	0.0859582	0.553567	0.350965	1.06139	0.19273
CNAG_01532	INP52	phosphatidylinositol phosphate phosphatase	3400	3754	3531	4176	4005	4510	0.00935326	-0.263286	0.00410334	8.23751	0.833188	2.02904
CNAG_01533	-	rho GTPase activator	2823	3173	2805	5231	5043	5811	0.000715312	0.357601	0.000240548	13.4845	1.28129	3.1455
CNAG_01534	-	hypothetical protein	178	119	199	238	198	252	0.895196	-0.0413503	0.855461	0.0331805	0.971745	0.0480819
CNAG_01535	-	Amino acid permease	6216	5979	6331	11881	10512	11615	0.000121936	0.366286	3.50981e-05	17.1196	1.28903	3.91387
CNAG_01536	-	myosin heavy chain	1431	1898	1681	2479	2340	2385	0.935817	0.0153271	0.908432	0.0132289	1.01068	0.0288092
CNAG_01537	VAD1	ATP-dependent RNA helicase VAD1	14772	16202	16206	15666	15247	17426	3.28e-07	-0.477063	6.01e-08	29.3594	0.718439	6.48418
CNAG_01538	-	hypothetical protein	102	45	116	1835	1796	1788	4.74e-48	3.85954	5.01e-50	221.175	14.5157	47.3241
CNAG_01539	INO1	Myo-inositol-1-phosphate synthase	27229	30153	24339	21191	21430	25523	2.12e-11	-0.775881	2.07e-12	49.4125	0.584032	10.6727
CNAG_01540	-	dehydrogenase	1230	1096	980	1433	1337	1714	0.632964	-0.0753519	0.544163	0.367878	0.949111	0.198621
CNAG_01541	-	hypothetical protein	243	243	219	275	168	325	0.112761	-0.401978	0.0689349	3.3082	0.75682	0.947841
CNAG_01542	-	taurine catabolism dioxygenase TauD	180	159	141	901	956	970	1.3e-37	2.0504	2.07e-39	172.532	4.14219	36.8875
CNAG_01543	-	AP-3 complex subunit beta	1610	2188	1786	1861	1908	2355	0.0141858	-0.382573	0.00653563	7.39635	0.767068	1.84815
CNAG_01544	-	histidyl-tRNA synthetase	14333	12148	13289	13427	13744	14393	2.52309e-05	-0.444643	6.38141e-06	20.3703	0.734766	4.59807
CNAG_01545	-	hypothetical protein, variant	368	336	442	840	810	971	1.08544e-05	0.680408	2.57314e-06	22.1111	1.60259	4.96439
CNAG_01546	-	S-adenosylmethionine-dependent methyltransferase	1344	1035	1056	1179	988	1452	0.00654716	-0.443417	0.00275958	8.95998	0.735391	2.18395
CNAG_01547	AIP1	wd-repeat protein	6110	5502	5266	7413	7090	8004	0.401627	-0.0956279	0.306368	1.04627	0.935865	0.396177
CNAG_01548	-	ATP-dependent RNA helicase FAL1	13959	13058	13945	12295	12003	13240	1.01e-13	-0.636232	7.5e-15	60.4617	0.643391	12.997
CNAG_01549	-	splicing factor 3a subunit 3	7575	6890	6815	7239	7165	7613	2.15695e-06	-0.459819	4.54e-07	25.4509	0.727077	5.66616
CNAG_01550	-	pre-rRNA-processing protein TSR3	2113	1678	2117	2572	2314	2788	0.34944	-0.135188	0.257923	1.27987	0.910551	0.456627
CNAG_01551	GAT201	GATA family transcription factor	949	1007	777	2417	2179	2723	1.47e-11	0.906525	1.4e-12	50.181	1.87452	10.8323
CNAG_01552	-	blocked early in transport 1	1636	1609	1574	3267	2957	3680	1.03e-07	0.525015	1.75e-08	31.7543	1.43895	6.98544
CNAG_01553	-	CORD and CS domain-containing protein	3034	3923	2931	2685	3196	3859	0.00132544	-0.537325	0.000476036	12.2073	0.689047	2.87764
CNAG_01554	-	sorting nexin-4	2488	2512	2141	3294	3188	3677	0.984078	-0.00348496	0.973264	0.00112322	0.997587	0.00697036
CNAG_01555	-	hypothetical protein	134	83	112	220	139	189	0.49135	0.222599	0.393358	0.728536	1.16683	0.308609
CNAG_01556	-	cytoplasmic protein	1664	2301	1712	1781	1736	2036	0.000501154	-0.545618	0.000163539	14.2095	0.685098	3.30003
CNAG_01557	CAM1	Calmodulin	19910	14761	16663	23544	20725	24551	0.555833	-0.0885831	0.460016	0.545855	0.940446	0.255055
CNAG_01558	-	chlorophyll synthesis pathway protein BchC	15593	40318	11146	24623	25429	26807	0.678255	-0.315936	0.594276	0.283717	0.803329	0.168607
CNAG_01559	-	hypothetical protein	2620	2821	2725	3217	3126	3229	0.00941996	-0.279378	0.00413839	8.22207	0.823946	2.02595
CNAG_01560	-	hypothetical protein	62	36	77	166	105	153	0.0375207	0.760862	0.0196346	5.44409	1.6945	1.42573
CNAG_01561	GID7	wd-repeat protein	3834	4646	4238	5832	6200	6649	0.762806	0.0441939	0.691337	0.157642	1.03111	0.117586
CNAG_01562	BLP4	pr4/barwin domain protein	10140	7633	8445	63093	46892	51313	1.16e-43	2.11305	1.45e-45	200.728	4.32605	42.9374
CNAG_01563	CLR3/HDA1	histone deacetylase 6/10	3214	2886	3004	3184	2977	3387	5.00593e-06	-0.442368	1.119e-06	23.7117	0.735926	5.30051
CNAG_01564	-	nucleolar protein 12	8816	7480	7455	6887	6166	7153	2.77e-12	-0.744498	2.38e-13	53.6651	0.596876	11.5581
CNAG_01565	-	biotin-[acetyl-CoA-carboxylase] ligase	9746	8519	7270	9874	9382	9860	0.0189926	-0.318834	0.00903718	6.81546	0.801718	1.72141
CNAG_01566	SPC98	gamma-tubulin complex component 3	1541	1401	1465	1788	1743	1611	0.0380272	-0.281935	0.0199464	5.41658	0.822487	1.41991
CNAG_01567	-	hypothetical protein	318	330	327	1029	821	1011	1.23e-13	1.03973	9.19e-15	60.0615	2.05585	12.9109
CNAG_01568	-	T-complex protein 1 subunit alpha	17274	17893	15678	17487	20200	22456	0.0319576	-0.269281	0.0163698	5.76271	0.829733	1.49543
CNAG_01569	-	hypothetical protein	1998	2148	1953	2531	2426	3106	0.374459	-0.113114	0.280948	1.1625	0.92459	0.426596
CNAG_01570	-	hypothetical protein, variant	9	27	9	92	58	119	0.000141736	2.04856	4.14071e-05	16.8058	4.13694	3.84852
CNAG_01571	-	hypothetical protein	2284	2053	2305	3827	3835	4350	0.00100115	0.343495	0.000348365	12.7906	1.26883	2.9995
CNAG_01572	CDC25	tyrosine phosphatase, variant	1290	1353	1118	2461	2583	2245	0.00284908	0.451731	0.00110943	10.6354	1.36768	2.5453
CNAG_01573	RIF2	hypothetical protein	1351	1421	1889	2172	1876	2257	0.676503	-0.0773154	0.592076	0.287114	0.94782	0.16973
CNAG_01574	-	hypothetical protein	3151	7293	3074	3647	3674	3451	0.11531	-0.835684	0.0707907	3.26459	0.560317	0.938134
CNAG_01575	-	ATP-binding cassette transporter	9947	9574	9178	12789	12812	13495	0.567659	-0.0628307	0.471618	0.518181	0.957384	0.245912
CNAG_01576	-	hypothetical protein	2945	2914	2466	3833	3742	4038	0.838936	-0.0294866	0.783646	0.0753889	0.979769	0.0762713
CNAG_01577	-	glutamate dehydrogenase (NADP)	59535	51529	56618	26341	26250	25666	1.29e-50	-1.60532	1.25e-52	233.113	0.328664	49.8909
CNAG_01578	-	hypothetical protein	2279	2355	2024	1946	2050	2424	2.45593e-06	-0.565891	5.22e-07	25.1807	0.675538	5.60978
CNAG_01579	-	vacuolar membrane-associated protein IML1	2159	2311	2051	6407	6031	6327	1.94e-22	1.01601	6.83e-24	101.589	2.02232	21.7116
CNAG_01580	SCP1	sterol regulatory element-binding protein cleavage-activating protein	5346	4878	4779	7334	6834	7052	0.959495	-0.00755145	0.938849	0.00588538	0.994779	0.0179573
CNAG_01581	-	hypothetical protein	169	114	126	147	126	198	0.274472	-0.316253	0.193612	1.68992	0.803153	0.561501
CNAG_01582	-	hypothetical protein	154	148	155	133	132	164	0.00595907	-0.605279	0.00247654	9.15785	0.657344	2.22482
CNAG_01583	-	vacuolar-sorting protein SNF7	4104	3637	3849	4263	4342	5109	0.0113305	-0.269811	0.00508502	7.84895	0.829428	1.94575
CNAG_01584	-	hydrolase	311	412	195	539	560	565	0.208483	0.349395	0.140604	2.17134	1.27403	0.680929
CNAG_01585	-	hypothetical protein	79	273	56	298	347	380	0.331852	0.813392	0.242534	1.36581	1.75734	0.479056
CNAG_01586	-	F-type H -transporting ATPase subunit B	51457	42896	43655	50324	49523	53476	0.00108986	-0.357293	0.000384592	12.6056	0.780628	2.96263
CNAG_01587	-	RNA polymerase-associated protein LEO1	4189	4060	4523	4820	4376	5346	0.00114222	-0.326415	0.000404193	12.5127	0.797516	2.94225
CNAG_01588	-	plasma membrane proteolipid 3	11198	8285	7445	17121	12191	12377	0.577603	0.125235	0.481585	0.495273	1.09069	0.23837
CNAG_01590	-	large subunit ribosomal protein L32	3250	2652	2822	2808	2929	3177	5.8837e-05	-0.478445	1.59156e-05	18.6246	0.717751	4.23035
CNAG_01591	-	hypothetical protein	3310	3353	2842	3775	3624	3606	0.0195962	-0.295585	0.00936317	6.75221	0.814742	1.70783
CNAG_01592	STE14	protein-S-isoprenylcysteine O-methyltransferase	265	147	311	339	309	255	0.599326	-0.17909	0.505444	0.443487	0.88326	0.222337
CNAG_01593	-	ribosome biogenesis protein SSF1/2	9063	7466	8463	7341	6781	7037	4.21e-11	-0.747748	4.37e-12	47.9513	0.595532	10.3757
CNAG_01594	-	glycine dehydrogenase	5035	5059	3789	7819	7146	6784	0.414601	0.142502	0.318515	0.995036	1.10382	0.38237
CNAG_01595	-	hypothetical protein	1344	1525	1495	1714	1538	1684	0.00596432	-0.332718	0.00247945	9.1557	0.794039	2.22444
CNAG_01596	-	hypothetical protein	4347	4134	4027	4898	4426	5231	0.0017982	-0.293719	0.000667279	11.5782	0.815796	2.74516
CNAG_01597	-	hypothetical protein	1519	1429	1479	2101	1944	2446	0.772128	0.0375389	0.702348	0.14604	1.02636	0.112311
CNAG_01598	-	template-activating factor I	11766	10036	11877	9821	9457	10698	5.13e-11	-0.678875	5.38e-12	47.5444	0.624652	10.2896
CNAG_01599	-	hypothetical protein	3096	2387	2212	2991	2678	2977	0.0256005	-0.341341	0.0127137	6.20852	0.789307	1.59175
CNAG_01600	RRB1	ribosome assembly protein RRB1	6117	5201	5227	4415	4003	4139	4.24e-15	-0.905374	2.72e-16	66.9989	0.533894	14.3726
CNAG_01601	-	lipase	328	396	271	732	750	866	4.71153e-05	0.725789	1.24726e-05	19.0896	1.6538	4.32684
CNAG_01602	-	IQ domain-containing calmodulin-binding protein	819	899	848	1026	838	1181	0.0594051	-0.271129	0.0331611	4.53744	0.828671	1.22618
CNAG_01603	-	hypothetical protein	2777	2963	2506	8475	7198	9048	3.97e-22	1.06936	1.44e-23	100.114	2.0985	21.4017
CNAG_01604	HAD10	TIGR01458 family HAD hydrolase, variant	418	804	428	791	930	1129	0.348519	0.271431	0.257157	1.284	1.207	0.457774
CNAG_01605	-	rossman fold oxidoreductase	99	78	87	323	247	312	2.87e-08	1.22711	4.48e-09	34.4034	2.34097	7.54167
CNAG_01606	-	hypothetical protein	0	0	0	20	7	11	0.00100806	5.59117	0.000351264	12.7751	48.2071	2.99652
CNAG_01607	TRX2	thioredoxin	3437	3077	3135	2886	2604	2666	2.2e-11	-0.749915	2.16e-12	49.3286	0.594639	10.6574
CNAG_01608	-	nuclear GTP-binding protein, variant	2467	2384	2198	2982	2563	2605	0.0218803	-0.297829	0.0106187	6.52804	0.813476	1.65995
CNAG_01609	-	Cystathionine gamma-synthase	5347	5713	4630	4969	5097	5386	8.28736e-06	-0.531468	1.91466e-06	22.6788	0.69185	5.08158
CNAG_01610	-	hypothetical protein	1213	1722	1308	1921	2216	2669	0.396543	0.166115	0.301905	1.06576	1.12203	0.401709
CNAG_01611	LIV8	infection related protein of unknown function	146	124	231	692	591	703	2.91e-10	1.47477	3.36e-11	43.9564	2.77939	9.53592
CNAG_01612	PSK202	CAMK/CAMKL protein kinase, variant	118	62	90	2206	1998	2069	8e-89	4.03143	3.05e-91	410.368	16.3524	88.0971
CNAG_01613	UNC80	hypothetical protein	2635	2920	2434	3843	3789	4099	0.75352	0.0440093	0.679771	0.170384	1.03097	0.122905
CNAG_01614	UBP10	ubiquitin carboxyl-terminal hydrolase 10	3281	3990	3191	4133	4363	4676	0.207539	-0.178161	0.139712	2.18113	0.883829	0.6829
CNAG_01615	-	aldo-keto reductase	1728	1669	1568	2111	2161	2669	0.828961	-0.0312061	0.771577	0.0842818	0.978602	0.081466
CNAG_01616	-	hypothetical protein	5147	5456	5078	6709	6370	6668	0.0961217	-0.176194	0.0571436	3.61841	0.885035	1.01718
CNAG_01619	-	hypothetical protein	1134	999	1014	1544	1488	1623	0.688424	0.0550341	0.605979	0.266072	1.03888	0.162144
CNAG_01620	-	hypothetical protein	977	1035	1170	1200	1176	1211	0.0124428	-0.335733	0.00563926	7.66211	0.792382	1.90508
CNAG_01621	-	hypothetical protein	13719	17789	16588	4738	4451	7409	2.66e-32	-2.06131	5.21e-34	147.814	0.239598	31.5745
CNAG_01622	-	CTD kinase subunit beta	1236	1327	1169	2035	1906	2166	0.0914895	0.198911	0.053996	3.71282	1.14783	1.03863
CNAG_01623	-	tRNA pseudouridine(55) synthase	2205	1797	2004	1589	1591	1557	2.19e-11	-0.848468	2.14e-12	49.3499	0.555374	10.6605
CNAG_01624	-	hypothetical protein	1302	1056	1302	1470	1570	1512	0.212587	-0.191031	0.143842	2.13637	0.875979	0.672464
CNAG_01625	-	hypothetical protein	1394	1340	1474	2268	2232	2160	0.237709	0.156254	0.163705	1.93967	1.11439	0.623954
CNAG_01626	ADA2	transcriptional adapter 2-alpha	2768	3230	3004	2996	2822	2932	1.8684e-06	-0.549869	3.87e-07	25.7576	0.683082	5.72853
CNAG_01627	-	amino oxidase	1966	1736	1619	3704	3567	3364	0.000231718	0.494314	7.07719e-05	15.7901	1.40865	3.63504
CNAG_01628	-	small subunit ribosomal protein S20	87471	71003	66343	59342	57103	55822	2.38e-11	-0.889549	2.37e-12	49.1509	0.539783	10.6229
CNAG_01629	-	multifunctional methyltransferase subunit TRM112	2256	1686	2061	1439	1339	1443	7.12e-14	-1.01677	5.21e-15	61.179	0.494222	13.1473
CNAG_01630	PSF2	polyadenylation factor subunit 2	3326	3369	2997	6270	5920	6504	1.46637e-05	0.437438	3.5573e-06	21.4897	1.3542	4.83376
CNAG_01631	-	mRNA cap guanine-N7 methyltransferase	2492	2453	2275	3375	2846	3467	0.467585	-0.088963	0.36864	0.808242	0.940198	0.33014
CNAG_01632	-	triacylglycerol lipase, variant	1339	1947	1233	1455	1705	1979	0.113285	-0.328944	0.0693108	3.29927	0.796119	0.945829
CNAG_01633	-	anaphase-promoting complex subunit 5	938	1148	1009	1072	1231	1235	0.0370289	-0.315598	0.0193271	5.47167	0.803518	1.43146
CNAG_01634	-	large subunit GTPase 1	6258	5822	6286	5303	5035	5131	5.39e-14	-0.75516	3.87e-15	61.7625	0.592481	13.2687
CNAG_01635	-	hypothetical protein	596	591	480	1682	1828	1887	1.43e-17	1.1863	6.91e-19	78.7888	2.27568	16.8457
CNAG_01636	-	peptidyl-prolyl cis-trans isomerase-like 1	3243	2981	2985	3268	3309	3440	0.000173099	-0.387056	5.13785e-05	16.3966	0.764689	3.76171
CNAG_01637	-	COPII-coated vesicle component Erv46	5027	4888	5581	7447	7667	8306	0.475787	0.0858121	0.377096	0.780146	1.06128	0.322587
CNAG_01638	MAD2	mitotic spindle assembly checkpoint protein MAD2	2281	1999	2094	2249	2441	2659	0.00965844	-0.304754	0.00425979	8.16962	0.80958	2.01509
CNAG_01639	-	elongation factor G, mitochondrial	23199	20663	24350	22754	22950	25619	1.41908e-05	-0.446363	3.42339e-06	21.5633	0.733891	4.84799
CNAG_01640	CSF1	Cold sensitive for fermentation protein 1, putative	3783	4736	4109	8496	7993	9445	1.17522e-05	0.524684	2.80765e-06	21.9437	1.43862	4.92988
CNAG_01641	-	DNA polymerase phi subunit	16575	14934	16940	14864	14579	13685	9.2e-09	-0.672475	1.32e-09	36.789	0.627429	8.03635
CNAG_01642	MSH3	DNA mismatch repair protein MSH3	2340	2635	2628	3411	3528	3863	0.979373	-0.00425427	0.966849	0.00172724	0.997056	0.00905187
CNAG_01643	-	hypothetical protein, variant	1671	1421	1441	2070	2040	2348	0.99695	-0.000883281	0.993423	6.79446e-05	0.999388	0.0013267
CNAG_01644	MLN4	hypothetical protein	4070	3918	3723	4149	4156	4496	8.63035e-05	-0.381444	2.40669e-05	17.8369	0.767669	4.06397
CNAG_01645	-	hypothetical protein	79	52	55	190	181	204	3.08715e-05	1.11809	7.92948e-06	19.9548	2.17059	4.51044
CNAG_01646	-	rab escort protein	1494	1405	1543	1630	1708	1654	0.00620634	-0.337935	0.0025999	9.06892	0.791173	2.20716
CNAG_01647	-	translocation protein SEC66	3195	3128	3522	4496	4500	5074	0.979952	0.00380038	0.968144	0.0015949	1.00264	0.00879513
CNAG_01648	H4	Histone H4	40097	26150	36076	22112	17454	22149	1.1e-14	-1.2424	7.36e-16	65.0355	0.42267	13.9595
CNAG_01649	-	hypothetical protein	4392	4728	4144	7106	6727	7766	0.0713178	0.191235	0.0406967	4.1886	1.14174	1.1468
CNAG_01650	MRPL7	large subunit ribosomal protein L7	5968	5250	5196	4992	5267	5792	4.08e-07	-0.542537	7.59e-08	28.9085	0.686563	6.3889
CNAG_01651	-	glicosidase	127	134	162	384	321	356	4.99212e-05	0.816336	1.32767e-05	18.9703	1.76093	4.30171
CNAG_01652	PNG1	peptide-N4-(N-acetyl-beta- glucosaminyl)asparagine amidase	1188	1200	1227	2363	2373	2797	1.46e-07	0.546247	2.52e-08	31.0437	1.46028	6.8343
CNAG_01653	CIG1	cytokine inducing-glycoprotein	139	24	168	140	68	267	0.986497	-0.0250157	0.976914	0.000837377	0.98281	0.00590431
CNAG_01654	CAS34	putative capsule structure designer protein	1683	1542	1608	2466	2495	2495	0.344887	0.118357	0.2538	1.30227	1.0855	0.462323
CNAG_01655	-	dynamin GTPase	11638	11871	10791	17341	17292	18635	0.227507	0.125238	0.155616	2.01632	1.09069	0.643005
CNAG_01656	-	hypothetical protein	803	543	929	984	617	900	0.114749	-0.379632	0.0703621	3.27455	0.768634	0.94025
CNAG_01657	-	fumarate hydratase, mitochondrial	23243	17751	18873	21294	20752	22329	0.00147403	-0.403909	0.000537197	11.9819	0.755808	2.83149
CNAG_01658	-	hypothetical protein	1555	1939	1723	2691	2352	2904	0.531523	0.0925754	0.434734	0.610142	1.06627	0.274478
CNAG_01659	-	hypothetical protein	1064	1097	1058	1496	1376	1680	0.921712	-0.0138623	0.890659	0.018898	0.990437	0.0354049
CNAG_01660	GCN3	translation initiation factor eif-2b subunit alpha	3086	3019	2893	2899	3027	3231	1.39728e-06	-0.484345	2.82e-07	26.3673	0.714822	5.85472
CNAG_01663	-	dynactin 4	365	251	337	380	291	477	0.291269	-0.252633	0.207932	1.58577	0.839363	0.535705
CNAG_01664	CDC28	CMGC/CDK/CDC2 protein kinase	3773	3211	3745	4749	4364	4358	0.178873	-0.178076	0.117533	2.44989	0.883881	0.747456
CNAG_01665	-	tRNA-splicing endonuclease subunit sen34	1457	1289	1405	1170	1197	1253	6.44e-10	-0.706192	7.79e-11	42.309	0.612936	9.19102
CNAG_01666	-	U6 snRNA-associated Sm-like protein LSm2	4297	2903	3385	2833	2546	3580	3.10795e-06	-0.758005	6.71e-07	24.6977	0.591313	5.50753
CNAG_01667	COQ2	4-hydroxybenzoate polyprenyl transferase	3705	2796	3227	3292	3209	3628	0.000464128	-0.452159	0.000150201	14.3697	0.730948	3.33336
CNAG_01668	-	hypothetical protein	16	1	20	137	97	116	3.56099e-06	2.73275	7.76e-07	24.4158	6.64722	5.44843
CNAG_01669	-	metallo-beta-lactamase	3238	2973	2780	3635	3696	4237	0.208547	-0.14815	0.140673	2.17059	0.902407	0.680795
CNAG_01670	-	hypothetical protein	418	372	466	544	477	559	0.293792	-0.180706	0.209985	1.57153	0.882271	0.531961
CNAG_01671	-	acetyl/propionyl CoA carboxylase	108	114	87	79	54	90	0.0010185	-0.99097	0.000355529	12.7525	0.503139	2.99204
CNAG_01672	-	Ras family protein	6	2	13	25	29	15	0.163867	1.2278	0.106384	2.60714	2.34209	0.785509
CNAG_01673	-	hypothetical protein, variant	4207	4009	3998	5015	4997	5032	0.0525727	-0.206677	0.0287524	4.78238	0.866531	1.27924
CNAG_01674	-	MFS transporter	100	65	90	244	243	229	9.56088e-05	0.984643	2.69675e-05	17.6204	1.97882	4.0195
CNAG_01675	-	tagatose-bisphosphate aldolase, variant	1020	1099	1110	1066	748	913	6.54e-07	-0.756296	1.25e-07	27.9349	0.592014	6.18435
CNAG_01676	-	tRNA (adenine-N(1)-)-methyltransferase non- catalytic subunit TRM6	3596	3606	4017	4111	4005	3779	0.000684706	-0.420869	0.000229751	13.5706	0.746974	3.1645
CNAG_01677	-	ER to Golgi transporter Yif1	3393	3186	3332	4200	3933	4308	0.0658428	-0.181941	0.0372081	4.34086	0.881516	1.18149
CNAG_01678	NHA1	Na /H exchanger AnNHA1	6578	5278	6263	12357	10724	11429	0.000812815	0.421392	0.000277135	13.2189	1.33922	3.09001
CNAG_01679	-	small subunit ribosomal protein S15	10170	8553	8426	9453	8901	8991	3.55733e-05	-0.496325	9.26839e-06	19.6566	0.70891	4.44888
CNAG_01680	-	3-methylcrotonyl-CoA carboxylase alpha subunit	54	73	52	193	145	190	0.000190367	1.04516	5.70421e-05	16.1984	2.0636	3.72041
CNAG_01681	FCY2	cytosine permease	10510	7987	10455	9880	8480	9445	3.04134e-05	-0.567737	7.80062e-06	19.9861	0.674674	4.51693
CNAG_01682	MCM4	mitochondrial outer membrane 72K protein	22834	20742	20513	18918	18722	19221	3.59e-12	-0.680332	3.12e-13	53.1309	0.624021	11.445
CNAG_01683	STL1	Monosaccharide transporter	45691	46713	32756	31845	33704	28125	7.7e-08	-0.919214	1.28e-08	32.3667	0.528797	7.1136
CNAG_01686	-	hypothetical protein	2312	2511	1863	3251	2204	1786	0.112862	-0.385131	0.069038	3.30574	0.76571	0.947454
CNAG_01687	RIO2	Atypical/RIO/RIO2 protein kinase	3654	2956	3982	3489	3026	3603	1.98787e-05	-0.57805	4.92261e-06	20.8672	0.669869	4.70161
CNAG_01688	-	ATP-dependent metalloprotease	12845	11882	13117	12616	12956	12433	5.10396e-06	-0.499472	1.14153e-06	23.6733	0.707365	5.29209
CNAG_01689	-	hypothetical protein, variant	11	14	17	58	91	93	9.67912e-06	2.01647	2.26834e-06	22.3532	4.04592	5.01416
CNAG_01690	NBT3	MFS transporter, variant 2	283	366	323	614	678	715	0.00162064	0.535699	0.000596008	11.7884	1.44964	2.79031
CNAG_01691	-	hypothetical protein, variant	1164	1977	980	2160	1775	2271	0.799795	0.0739066	0.735383	0.114226	1.05256	0.0970211
CNAG_01692	UBA3	rub1/nedd8 activating enzyme	2049	2199	1923	3498	3332	3645	0.0227644	0.252996	0.0111261	6.44507	1.19168	1.64274
CNAG_01693	-	exosome complex component RRP45	2045	2103	2091	1537	1338	1572	2.06e-23	-1.00072	6.78e-25	106.167	0.49975	22.6851
CNAG_01694	-	hypothetical protein	1566	1923	1620	2311	2245	2507	0.773116	-0.0443774	0.704002	0.144342	0.969708	0.111755
CNAG_01695	-	hypothetical protein	180	194	211	630	645	804	3.81e-16	1.31431	2.24e-17	71.9235	2.48684	15.4195
CNAG_01696	-	chaperone DnaJ	8600	13381	9819	8057	11732	15440	0.116937	-0.372901	0.0719971	3.23689	0.772228	0.932046
CNAG_01697	CSN1201	COP9 signalosome subunit 12-like protein	3174	2270	2673	3425	3086	3483	0.167129	-0.209728	0.108789	2.57172	0.8647	0.776947
CNAG_01698	-	hypothetical protein	787	591	739	1435	1292	1289	0.00902977	0.417637	0.00395254	8.30549	1.33574	2.04432
CNAG_01699	-	histone deacetylase 1/2	782	583	801	1639	1474	1775	1.23448e-05	0.661873	2.95376e-06	21.8464	1.58214	4.90852
CNAG_01701	-	RTA1 domain-containing protein	3740	3593	3803	4210	4003	4636	0.000835668	-0.305556	0.000285748	13.1616	0.80913	3.07797
CNAG_01702	-	Integral membrane protein	509	454	581	2246	1789	1848	1.41e-19	1.42259	5.99e-21	88.1748	2.68067	18.8513
CNAG_01703	-	hypothetical protein	327	192	424	813	613	890	0.00359167	0.778982	0.00142554	10.1725	1.71592	2.4447
CNAG_01704	IRK6	serine/threonine protein kinase	12075	9734	11609	23751	20408	22134	9.27191e-05	0.479557	2.60744e-05	17.6845	1.39432	4.03283
CNAG_01706	-	hypothetical protein	61	38	68	283	274	323	2.82e-13	1.8858	2.2e-14	58.3451	3.69557	12.5502
CNAG_01707	CRG3	Putative regulator of G-protein signaling protein	3095	2839	2859	5215	4790	4826	0.033436	0.247254	0.0172299	5.67281	1.18695	1.47579
CNAG_01708	GAT7	hypothetical protein	2743	2678	2791	3348	3114	3652	0.0271245	-0.211804	0.0135639	6.09403	0.863457	1.56664
CNAG_01709	-	translation initiation factor 5	13305	10936	11903	12991	12019	11554	0.000124657	-0.48826	3.59578e-05	17.0737	0.712884	3.90428
CNAG_01710	-	hypothetical protein	36	40	38	134	140	179	4.27e-07	1.47466	7.98e-08	28.8104	2.77919	6.36977
CNAG_01711	-	glycerol-3-phosphate O- acyltransferase/dihydroxyacetone phosphate acyltransferase	8042	8583	7200	8853	10509	11533	0.355424	-0.136406	0.263345	1.25108	0.909783	0.449253
CNAG_01712	HTF2	hypothetical protein	3468	3488	3453	3635	3514	3858	2.01639e-06	-0.429791	4.21e-07	25.5968	0.742369	5.69543
CNAG_01713	-	hypothetical protein	2124	1811	1745	8351	7567	8704	3.05e-48	1.6049	3.18e-50	222.079	3.04174	47.5162
CNAG_01714	-	sulfonate dioxygenase	33	25	24	415	362	477	1.15e-45	3.41932	1.37e-47	210.002	10.6984	44.9391
CNAG_01715	-	ribosome biogenesis protein BMS1	9422	8580	10092	9446	8536	8289	1.15763e-06	-0.602404	2.31e-07	26.7581	0.658655	5.93643
CNAG_01716	-	hypothetical protein	2959	3334	3001	1451	1318	1512	2.56e-53	-1.63032	2.2e-55	245.74	0.323016	52.5917
CNAG_01717	-	cell differentiation protein rcd1	1884	2069	1611	2364	2402	2391	0.346557	-0.144248	0.255326	1.29392	0.904851	0.460226
CNAG_01718	-	hypothetical protein	565	550	641	631	636	715	0.0182431	-0.336664	0.00863594	6.89661	0.791871	1.7389
CNAG_01719	-	hypothetical protein	64	34	47	653	537	613	4.98e-41	3.12652	6.74e-43	188.506	8.73325	40.3028
CNAG_01720	VPS23	ESCRT-I complex subunit TSG101	933	1021	763	1052	921	1101	0.0311718	-0.334917	0.0158485	5.81961	0.79283	1.50624
CNAG_01721	HEM3	porphobilinogen deaminase	7657	8048	7188	8100	7348	8196	2.2574e-06	-0.464183	4.77e-07	25.3553	0.724882	5.64639
CNAG_01722	-	vacuolar protein sorting-associated protein vps13	6174	7553	6477	8938	9632	10764	0.870736	0.0258613	0.822237	0.050476	1.01809	0.0601134
CNAG_01723	-	hypothetical protein	3133	3160	2666	7668	7178	6450	1.1e-07	0.745724	1.86e-08	31.6368	1.67682	6.9601
CNAG_01725	-	hypothetical protein, variant	83	86	101	64	60	88	0.0038574	-0.867515	0.00154097	10.029	0.54809	2.41371
CNAG_01726	SPT16	FACT complex subunit spt16	9923	8394	10676	11821	10877	11062	0.0299201	-0.287358	0.0151458	5.89943	0.819401	1.52404
CNAG_01727	-	hsp71-like protein	178399	270477	154781	135317	228959	270139	0.306172	-0.44511	0.220378	1.50191	0.734528	0.514034
CNAG_01728	-	hypothetical protein	2350	2300	2060	5307	5031	4935	7.72e-09	0.680272	1.1e-09	37.1442	1.60244	8.11246
CNAG_01729	-	ATP-dependent RNA helicase DHX37/DHR1	4395	3872	4223	3123	2777	2859	9.25e-20	-1.01941	3.89e-21	89.0302	0.493318	19.034
CNAG_01730	STE7	STE/STE7/MEK1 protein kinase	666	759	715	1079	1154	1227	0.19569	0.183039	0.130412	2.2876	1.13527	0.708432
CNAG_01731	-	hypothetical protein	1051	917	1129	1679	1419	1535	0.658328	0.0721171	0.571636	0.319954	1.05126	0.181558
CNAG_01732	-	nuclear protein localization protein 4	3636	3850	2793	4668	4382	5231	0.826397	-0.0388783	0.768276	0.0868072	0.973411	0.0828112
CNAG_01733	PRP19	pre-mRNA-processing factor 19	20488	18730	18655	20516	19413	20618	2.66881e-06	-0.443569	5.72e-07	25.0056	0.735313	5.57368
CNAG_01734	-	pre-mRNA-splicing factor ATP-dependent RNA helicase DHX16	5823	7010	6444	7891	8326	9002	0.34736	-0.123113	0.256089	1.28978	0.918204	0.45922
CNAG_01735	-	hypothetical protein	4570	3402	2085	24094	19469	17881	2.17e-08	2.10866	3.32e-09	34.9881	4.31291	7.66414
CNAG_01736	DAD4	DASH complex subunit dad4	1218	713	829	1074	975	1166	0.170856	-0.290988	0.111509	2.5327	0.817342	0.76737
CNAG_01737	ERG25	C-4 methyl sterol oxidase, putative	10392	10211	7987	17074	16657	15976	0.0460808	0.2924	0.0247317	5.04258	1.22468	1.33648
CNAG_01738	-	hypothetical protein	3847	3509	3354	5381	4448	5722	0.870736	0.0233501	0.822179	0.0505097	1.01632	0.0601134
CNAG_01739	-	hypothetical protein, variant	1508	1881	1514	3125	2969	3791	0.000293494	0.495284	9.11912e-05	15.3108	1.4096	3.5324
CNAG_01740	CDC12	septin	4465	4091	4643	6395	5667	6170	0.735487	-0.0433672	0.660157	0.193333	0.970387	0.133425
CNAG_01741	-	hypothetical protein, variant	553	648	536	644	684	899	0.387221	-0.158926	0.292856	1.10645	0.895692	0.412042
CNAG_01742	AQY1	aquaporin-associated protein	18	12	11	18	12	14	0.597953	-0.407741	0.503957	0.446594	0.753803	0.223333
CNAG_01743	-	hypothetical protein	472	542	479	1314	956	1273	2.05615e-06	0.731059	4.31e-07	25.5523	1.65986	5.68695
CNAG_01744	HAD1/GPP2	phosphatase	10680	13381	7696	24857	24502	22898	0.000443419	0.680483	0.000142736	14.4657	1.60268	3.35319
CNAG_01745	GPD2	glycerol-3-phosphate dehydrogenase (NAD())	6461	9663	5027	23393	20664	21446	1.05e-07	1.12137	1.77e-08	31.7292	2.17554	6.98012
CNAG_01746	-	E3 ubiquitin-protein ligase RNF14	1042	980	1001	1876	1706	1991	0.000498817	0.37052	0.000162715	14.219	1.29282	3.30206
CNAG_01749	-	hypothetical protein	1023	740	1239	1652	1664	1663	0.282892	0.223533	0.200699	1.63728	1.16759	0.548379
CNAG_01750	-	hsp72-like protein	39355	61818	34691	28707	58185	65575	0.478524	-0.349316	0.379677	0.771748	0.784956	0.320097
CNAG_01751	-	hypothetical protein, variant	506	583	365	1431	1059	914	0.00241587	0.724838	0.000922029	10.9779	1.65271	2.61693
CNAG_01752	-	solute carrier family 25 (mitochondrial 2- oxodicarboxylate transporter), member 21	19115	14310	15681	22215	23584	23901	0.995238	-0.00151936	0.990221	0.000150217	0.998947	0.00207291
CNAG_01753	-	hypothetical protein, variant	4630	4919	3350	8658	7595	7385	0.0363331	0.367865	0.0189193	5.50896	1.29044	1.4397
CNAG_01754	-	hypothetical protein	4413	4586	4214	6471	6489	6475	0.696869	0.0494127	0.615898	0.251675	1.03484	0.156849
CNAG_01755	-	hypothetical protein	7016	6097	6743	6648	6098	5899	7.72e-07	-0.596164	1.5e-07	27.5935	0.66151	6.11213
CNAG_01756	-	mitochondrial import inner membrane translocase subunit tim22	1800	1381	1608	1472	1417	1397	2.00225e-06	-0.666043	4.17e-07	25.6138	0.630233	5.69848
CNAG_01758	PGU1	Polygalacturonase	160	135	159	224	222	262	0.584387	0.128686	0.488959	0.478816	1.0933	0.233299
CNAG_01759	-	vacuolar membrane protein	71	52	59	48	46	49	0.0154872	-0.856973	0.00719421	7.22383	0.55211	1.81003
CNAG_01760	-	hypothetical protein	153	182	223	390	328	322	0.0948033	0.39123	0.0561966	3.64622	1.31151	1.02318
CNAG_01761	-	hypothetical protein	31598	33257	24386	17419	20119	21508	2.74e-14	-1.10602	1.92e-15	63.1444	0.464573	13.5621
CNAG_01763	-	cytoplasmic protein	12	29	26	25	21	33	0.666823	-0.284771	0.581307	0.304126	0.820872	0.17599
CNAG_01764	-	cytoplasmic protein	1267	1612	1514	1338	1444	1685	0.00069541	-0.489614	0.000233599	13.5395	0.712215	3.15776
CNAG_01765	-	hypothetical protein, variant	2018	2056	2012	2917	2972	3081	0.676785	0.0509299	0.592474	0.286498	1.03593	0.169549
CNAG_01768	-	hypothetical protein	7076	5331	6883	7106	6737	6605	0.00339608	-0.42134	0.00134081	10.2855	0.74673	2.46902
CNAG_01769	-	solute carrier family 25 (mitochondrial aspartate/glutamate transporter), member 12/13	5425	4990	4998	11851	13114	13337	2.29e-14	0.805478	1.59e-15	63.5164	1.74772	13.6403
CNAG_01770	-	mitochondrion organization and biogenesis-related protein, putative	6647	7154	5663	11421	10879	12340	0.00868465	0.320019	0.00378438	8.38448	1.24835	2.06125
CNAG_01771	-	hypothetical protein	1692	1469	1492	2994	2486	3047	0.00238371	0.360991	0.000908583	11.0052	1.28431	2.62275
CNAG_01772	-	hypothetical protein	7887	6381	7288	8078	8633	8718	0.0319566	-0.268643	0.0163653	5.76319	0.8301	1.49544
CNAG_01773	-	beclin 1	973	937	896	1464	1426	1396	0.465269	0.104537	0.366529	0.815399	1.07515	0.332296
CNAG_01776	-	2,4-dihydroxyhept-2-ene-1,7-dioic acid aldolase	277	233	195	3897	3614	3671	9.63e-113	3.48044	1.54e-115	522.019	11.1613	112.016
CNAG_01777	-	glyoxylate reductase	1606	1797	1299	5723	6254	6453	2.71e-24	1.46179	8.57e-26	110.267	2.75451	23.5669
CNAG_01778	-	hypothetical protein	3161	2612	3010	5137	4731	5101	0.0285815	0.260299	0.0143939	5.98918	1.19773	1.54392
CNAG_01779	-	hypothetical protein	1346	1209	1135	2543	2291	2504	4.69176e-05	0.482222	1.24087e-05	19.0994	1.39689	4.32866
CNAG_01780	-	cytoplasmic protein	13322	9692	10284	9692	9229	9955	1.81e-07	-0.714034	3.17e-08	30.5992	0.609613	6.74129
CNAG_01781	-	hypothetical protein, variant 3	148	152	159	312	251	497	0.00803604	0.677944	0.00347803	8.53802	1.59986	2.09496
CNAG_01787	-	hypothetical protein	241	133	206	387	336	346	0.150718	0.375833	0.0965498	2.76163	1.29759	0.821836
CNAG_01788	-	tRNA(His) guanylyltransferase	7580	5504	6845	5580	5099	5475	2.18e-09	-0.811233	2.84e-10	39.7818	0.569895	8.66094
CNAG_01789	-	hypothetical protein	5723	5523	5485	5418	5614	6125	3.18e-07	-0.473993	5.8e-08	29.4294	0.719969	6.49812
CNAG_01790	-	upstream activation factor subunit UAF30	1558	1480	1727	1956	1994	2264	0.318611	-0.128551	0.231055	1.43436	0.914749	0.496739
CNAG_01791	-	ribosome production factor 1	4721	4333	5417	5571	5274	5163	0.00675749	-0.360471	0.00285904	8.89531	0.77891	2.17021
CNAG_01792	-	ATP-dependent DNA helicase PIF1, variant	3541	3174	3680	4773	4492	4464	0.433663	-0.10518	0.335892	0.926048	0.929689	0.362848
CNAG_01793	-	hypothetical protein, variant	1059	1138	1283	1691	1448	1794	0.951348	-0.0107201	0.928162	0.00812846	0.992597	0.0216607
CNAG_01794	-	2-hydroxyacid dehydrogenase	381	393	354	699	604	636	0.0888042	0.272726	0.0522146	3.76888	1.20809	1.05157
CNAG_01795	-	hypothetical protein	815	799	689	1900	1586	2045	5.27e-09	0.749051	7.28e-10	37.9445	1.68069	8.27847
CNAG_01796	-	hypothetical protein, variant 3	238	185	208	2527	2187	2578	1.09e-107	3.01895	2.15e-110	498.374	8.10575	106.962
CNAG_01797	-	hypothetical protein	4330	3762	4017	4356	4180	4650	0.000117373	-0.387362	3.36402e-05	17.2002	0.764526	3.93043
CNAG_01798	-	phosphatase activator	1345	1414	1302	1594	1571	1734	0.0325521	-0.240155	0.0167023	5.72739	0.846655	1.48742
CNAG_01799	-	ubiquinol-cytochrome c reductase subunit 8	22759	17545	17827	16111	15888	16825	1.98e-09	-0.759866	2.56e-10	39.9829	0.590551	8.70278
CNAG_01800	-	hypothetical protein	5872	3855	4422	3956	3346	4436	1.40242e-06	-0.7843	2.84e-07	26.3579	0.580634	5.85312
CNAG_01801	-	hypothetical protein	8	14	9	37	7	18	0.606323	0.478834	0.513209	0.427519	1.39362	0.217296
CNAG_01802	-	Fe-S cluster assembly protein DRE2	3407	3681	3014	4557	4273	4701	0.50726	-0.0888821	0.409837	0.679273	0.940251	0.294769
CNAG_01803	-	hypothetical protein	169	2318	168	231	177	213	1	-2.61652	1	4.41741	0.163061
CNAG_01806	-	hypothetical protein	0	2	2	24	9	35	0.00146756	3.54351	0.000534479	11.9914	11.6601	2.8334
CNAG_01807	UPF1	ATP-dependent helicase	1162	1099	1246	1443	1501	1566	0.263922	-0.145949	0.185035	1.75672	0.903785	0.578524
CNAG_01808	-	solute carrier family 25, member 34/35	5966	5298	5378	5819	5487	6058	3.93704e-06	-0.448734	8.64e-07	24.2094	0.732686	5.40483
CNAG_01809	-	U4/U6 small nuclear ribonucleoprotein Prp3	3537	3395	2667	4175	3397	4225	0.154353	-0.216123	0.0991821	2.71865	0.860876	0.811485
CNAG_01810	-	DNA-directed RNA polymerase I subunit RPA12	1186	1156	1165	1137	1026	948	1.2666e-06	-0.677529	2.54e-07	26.5747	0.625235	5.89736
CNAG_01811	-	hypothetical protein	3977	3774	3618	4504	4426	5106	0.0370639	-0.207903	0.0193545	5.4692	0.865795	1.43105
CNAG_01812	-	large subunit ribosomal protein L24e	7936	5845	6657	6615	5615	5810	1.78207e-06	-0.68678	3.68e-07	25.8547	0.621239	5.74908
CNAG_01813	-	mannose-1-phosphate guanyltransferase	22203	18147	19442	33223	32805	33983	0.0461454	0.234511	0.024772	5.03975	1.17651	1.33587
CNAG_01814	-	hypothetical protein	1716	1361	1773	3725	3304	3557	5.47496e-06	0.617486	1.23259e-06	23.5257	1.5342	5.26162
CNAG_01815	-	hypothetical protein	1847	1754	1601	2778	2635	3025	0.101998	0.18624	0.0613016	3.50182	1.13779	0.991409
CNAG_01816	-	hypothetical protein, variant	143	155	111	338	361	321	0.000251708	0.814075	7.71868e-05	15.626	1.75817	3.5991
CNAG_01817	-	signal recognition particle receptor subunit alpha	1149	960	941	1189	1132	1381	0.0926514	-0.233734	0.0547615	3.68933	0.850431	1.03315
CNAG_01818	-	ATP synthase mitochondrial F1 complex assembly factor 2	4885	4820	4959	5412	5231	6522	0.00344078	-0.287563	0.001361	10.2579	0.819285	2.46334
CNAG_01819	-	large subunit ribosomal protein L1	29	52	34	74	52	78	0.500567	0.307237	0.403075	0.699133	1.23734	0.300538
CNAG_01820	PYK1	pyruvate kinase, variant	51268	42765	43774	66976	69589	67572	0.664588	0.0613118	0.578624	0.308465	1.04341	0.177447
CNAG_01821	-	hypothetical protein	927	1305	896	2886	2587	3132	9.11e-09	0.945412	1.3e-09	36.809	1.92574	8.04042
CNAG_01822	-	hypothetical protein	4344	3018	3351	3046	2862	3378	1.08093e-06	-0.717671	2.15e-07	26.8953	0.608078	5.9662
CNAG_01823	INM1	myo-inositol-1(or 4)-monophosphatase	4289	3882	3900	5342	5001	5369	0.239955	-0.128772	0.165458	1.92363	0.91461	0.619871
CNAG_01824	-	transmembrane protein, variant	6842	6251	5969	13780	14048	13214	2.72e-07	0.601604	4.92e-08	29.7497	1.5174	6.56607
CNAG_01825	-	hypothetical protein	821	818	866	1337	1194	1442	0.220221	0.152267	0.149738	2.07492	1.11131	0.657142
CNAG_01826	-	transcription initiation factor TFIIH subunit 1	1267	1465	1314	1804	1796	2214	0.962855	0.00810226	0.943321	0.00505478	1.00563	0.0164393
CNAG_01827	-	hypothetical protein	147	121	157	1088	1061	984	4.47e-43	2.37754	5.72e-45	197.994	5.19648	42.3493
CNAG_01828	SWD1	compass component swd1	2280	2014	2348	1920	1807	1830	1.01e-10	-0.76456	1.11e-11	46.1243	0.588633	9.99389
CNAG_01832	-	hypothetical protein	1297	1106	1244	1895	1817	2154	0.161219	0.173228	0.104327	2.63811	1.12758	0.792584
CNAG_01833	-	translation initiation factor 4E	12209	10459	11329	11265	11192	11339	1.31433e-06	-0.515642	2.64e-07	26.4973	0.699482	5.8813
CNAG_01834	-	hypothetical protein, variant	4402	3996	3631	5069	5424	6629	0.979136	-0.00491845	0.966374	0.00177711	0.996597	0.00915704
CNAG_01835	-	hypothetical protein	1365	1481	1417	5399	5262	5877	1.2e-51	1.44464	1.11e-53	237.934	2.72195	50.9197
CNAG_01836	-	long-chain acyl-CoA synthetase	86	72	87	208	182	224	0.000545738	0.812329	0.000179631	14.033	1.75604	3.26302
CNAG_01837	VPS35	vacuolar protein sorting-associated protein VPS35	3865	4128	3664	6573	6461	7068	0.0074567	0.275672	0.00319337	8.69355	1.21056	2.12745
CNAG_01839	ESS1	peptidyl-prolyl cis-trans isomerase NIMA- interacting 1	5950	5115	5450	7754	7427	8549	0.930086	0.0115185	0.900924	0.0154987	1.00802	0.0314769
CNAG_01840	TUB2	tubulin beta chain	80190	61798	65318	67900	70936	66217	0.000150534	-0.519709	4.41811e-05	16.6827	0.697512	3.82237
CNAG_01841	GLN3	GATA family transcription factor	45	42	37	194	117	196	1.37932e-06	1.51103	2.78e-07	26.3982	2.85014	5.86033
CNAG_01842	-	hypothetical protein	6675	5972	5997	5636	5166	5218	3.99e-11	-0.725741	4.12e-12	48.0649	0.604686	10.3988
CNAG_01843	-	elongation factor Ts, mitochondrial	8403	7386	7277	8584	7917	9581	0.00114299	-0.335764	0.000404606	12.5108	0.792364	2.94196
CNAG_01844	-	tetracycline efflux protein	685	621	812	922	855	1036	0.541256	-0.103828	0.444491	0.584661	0.930561	0.266598
CNAG_01845	PKC1	AGC/PKC protein kinase	7569	9042	7283	12103	11529	13207	0.405732	0.112244	0.310448	1.02877	1.08091	0.39176
CNAG_01846	-	flavoprotein	1922	3446	1762	5130	5517	5664	0.00374857	0.683448	0.00149427	10.0857	1.60597	2.42613
CNAG_01847	-	hypothetical protein	709	726	652	731	594	594	6.76959e-05	-0.628095	1.85533e-05	18.3323	0.64703	4.16944
CNAG_01848	-	hypothetical protein	3453	4196	4102	4900	4554	5827	0.319008	-0.137241	0.231421	1.43211	0.909257	0.496198
CNAG_01849	-	hypothetical protein	29	29	43	32	32	34	0.251051	-0.553466	0.174776	1.8415	0.681381	0.600238
CNAG_01850	TCO1	Two-component-like sensor kinase	7356	6406	7103	8685	7652	8114	0.0140779	-0.279484	0.00648244	7.41105	0.823886	1.85146
CNAG_01851	-	hypothetical protein	1	2	3	21	10	10	0.0437958	2.26624	0.0233761	5.14034	4.81069	1.35857
CNAG_01852	-	CCR4-NOT transcription complex subunit 2	7860	7795	8143	7806	7584	8754	9.63e-09	-0.491249	1.38e-09	36.6944	0.711409	8.0164
CNAG_01853	-	splicing factor 3B subunit 5	2752	2068	2464	2392	2264	2464	4.25735e-05	-0.541879	1.11917e-05	19.2964	0.686876	4.37086
CNAG_01854	-	heparinase II/III family protein	41456	29654	34554	92255	81919	82626	6.81e-08	0.775283	1.12e-08	32.6192	1.71153	7.1666
CNAG_01855	-	hypothetical protein	1962	1454	1792	2617	2436	2508	0.8654	0.0307886	0.81507	0.0547049	1.02157	0.0627832
CNAG_01856	-	hypothetical protein	227	179	239	365	306	351	0.489679	0.153387	0.391628	0.733882	1.11218	0.310088
CNAG_01857	-	hypothetical protein	0	0	0	0	0	0	1		1
CNAG_01858	HOB2	hypothetical protein	145	120	137	902	750	929	4.67e-42	2.16945	6.08e-44	193.291	4.49851	41.3311
CNAG_01859	-	hypothetical protein	2214	2711	2231	3110	3024	3203	0.380311	-0.125995	0.286386	1.13653	0.916372	0.419861
CNAG_01860	-	ornithine cyclodeaminase	1546	1655	1357	1925	1853	1942	0.182131	-0.181384	0.12001	2.41719	0.881857	0.739616
CNAG_01861	-	26S proteasome non-ATPase regulatory subunit 10	2513	1986	2183	2437	2203	2750	0.00370221	-0.368359	0.0014726	10.1126	0.774663	2.43154
CNAG_01862	-	hexose transporter	39	23	38	599	615	711	1.82e-64	3.75508	1.08e-66	297.636	13.5018	63.7392
CNAG_01863	SNF2	ATP-dependent helicase STH1/SNF2	8716	9338	7956	8062	7553	8315	1.23e-09	-0.630742	1.54e-10	40.9736	0.645844	8.90913
CNAG_01864	NDX5	hypothetical protein	3777	3062	3157	2958	2807	3270	1.55e-08	-0.65739	2.32e-09	35.6885	0.634024	7.80973
CNAG_01865	-	hypothetical protein	680	648	665	879	835	1033	0.729286	-0.0511253	0.652958	0.202191	0.965183	0.137102
CNAG_01866	-	hypothetical protein	1035	983	1290	3333	3364	3192	1.27e-13	1.07447	9.49e-15	59.9985	2.10595	12.8977
CNAG_01867	MDV1	mitochondrial division protein 1	3156	4175	3232	4764	4932	5922	0.781374	0.049414	0.713266	0.135036	1.03484	0.107141
CNAG_01868	-	protein KTI12	1589	1805	1625	1728	1867	1790	0.00183216	-0.405073	0.000681907	11.5379	0.755198	2.73704
CNAG_01869	-	hypothetical protein	1670	1942	2114	2101	2073	2201	0.00771208	-0.354904	0.00331886	8.62332	0.781921	2.11283
CNAG_01870	-	electron transfer flavoprotein beta subunit	12166	10082	10538	11421	11197	13091	0.00035923	-0.388725	0.000113471	14.8982	0.763804	3.44463
CNAG_01871	-	prolactin regulatory element-binding protein	1806	1872	1791	2661	2613	2470	0.984078	-0.00374029	0.973309	0.00111943	0.997411	0.00697036
CNAG_01872	CTR2	Copper transport protein CTR2, putative	695	513	526	757	716	917	0.800591	-0.0515404	0.736311	0.113395	0.964906	0.0965894
CNAG_01873	-	hypothetical protein	0	2	0	41	46	42	2.56e-09	5.50504	3.37e-10	39.4457	45.4133	8.59111
CNAG_01874	-	Glutathione S-transferase	1492	1320	1250	1745	1881	2132	0.96395	-0.00809128	0.944868	0.0047821	0.994407	0.0159454
CNAG_01875	-	wd-repeat protein	3062	3816	3119	5418	5639	6109	0.0451871	0.269109	0.0242131	5.0793	1.20506	1.34499
CNAG_01876	-	TBC1 domain family member 5	1531	1592	1458	2037	2055	2000	0.486886	-0.0953879	0.388407	0.743923	0.936021	0.312573
CNAG_01877	GUA1	GMP synthase [glutamine-hydrolyzing]	31600	24359	29202	26954	27052	28419	5.29598e-06	-0.555121	1.18709e-06	23.598	0.6806	5.27605
CNAG_01878	-	myo-inositol 2-dehydrogenase	2427	1930	2186	3245	3063	3461	0.628363	0.0677844	0.539281	0.376874	1.04811	0.20179
CNAG_01879	-	cathepsin A (carboxypeptidase C)	2343	1929	1977	3182	3122	3474	0.295879	0.13572	0.21155	1.56079	1.09864	0.528885
CNAG_01880	-	hypothetical protein	2503	2454	2015	3036	2955	2970	0.319064	-0.145162	0.231501	1.43162	0.904278	0.496122
CNAG_01881	-	molecular chaperone GrpE	8109	8714	8168	9017	8934	12499	0.0796406	-0.234485	0.0461902	3.97465	0.849988	1.09887
CNAG_01882	-	histone-lysine N-methyltransferase, H3 lysine-79 specific	917	1104	871	1409	1394	1794	0.354198	0.152059	0.262254	1.25682	1.11115	0.450753
CNAG_01883	GAT8	hypothetical protein	14	17	37	144	134	131	3.28e-07	2.08147	6.01e-08	29.3611	4.23239	6.48427
CNAG_01884	-	large subunit ribosomal protein L3	285375	221149	216900	216736	215792	204590	8.94e-07	-0.687614	1.76e-07	27.2854	0.62088	6.04844
CNAG_01885	CID14	DNA polymerase sigma subunit	2554	2668	2618	2727	2563	2749	1.63783e-06	-0.473473	3.35e-07	26.0384	0.720229	5.78573
CNAG_01886	-	hypothetical protein	832	820	878	1214	1065	1406	0.865841	0.0265554	0.815805	0.0542629	1.01858	0.0625618
CNAG_01889	-	Glutathione S-transferase	563	528	545	856	682	705	0.783879	-0.0523749	0.716218	0.132145	0.964348	0.105751
CNAG_01890	MET6	5-methyltetrahydropteroyltriglutamate- homocysteine S-methyltransferase	144491	122053	117636	115135	121671	107855	1.05101e-06	-0.659118	2.08e-07	26.9544	0.633265	5.97839
CNAG_01891	-	RAD57 protein	1155	999	1119	1554	1215	1486	0.368776	-0.133937	0.27546	1.18935	0.911341	0.433237
CNAG_01892	-	hypothetical protein	3101	3336	2115	5059	3761	4138	0.692099	0.0900675	0.610065	0.260081	1.06442	0.159832
CNAG_01893	-	glutathione S-transferase Gst3	2183	2608	1833	3478	3153	3297	0.682378	0.0748049	0.599147	0.276284	1.05322	0.165975
CNAG_01894	-	aspartate-tRNA ligase	6338	6309	6660	6421	5990	6432	4.05e-09	-0.54452	5.49e-10	38.4934	0.685619	8.39206
CNAG_01895	-	hypothetical protein	41	64	53	56	34	59	0.146617	-0.606603	0.0934543	2.81384	0.656741	0.833815
CNAG_01896	-	alcohol dehydrogenase (NADP)	29095	30321	27298	67397	56031	65366	2.47e-09	0.610625	3.24e-10	39.5248	1.52692	8.60748
CNAG_01897	BDF1	bromodomain-containing factor 1	11756	11218	10612	15185	14863	15315	0.516672	-0.0743051	0.419538	0.65161	0.9498	0.286785
CNAG_01898	MAK11	protein MAK11	3942	4021	4153	3429	3327	3224	7.21e-13	-0.786056	5.81e-14	56.4344	0.579927	12.1418
CNAG_01899	GIM5	prefoldin alpha subunit	4933	3719	3595	4383	4325	4874	0.0138013	-0.360997	0.00633473	7.45253	0.778626	1.86008
CNAG_01900	NDX1	hypothetical protein	2387	2264	2246	3038	3032	3819	0.975818	0.00474826	0.9625	0.00221056	1.0033	0.0106312
CNAG_01901	NDX2	hypothetical protein	5	0	4	6	2	8	0.868343	0.295496	0.819404	0.0521261	1.22731	0.0613086
CNAG_01902	-	general transcriptional repressor	5932	7038	6036	6335	6450	7099	0.000101819	-0.446038	2.8907e-05	17.4884	0.734056	3.99217
CNAG_01903	-	hypothetical protein	496	581	503	549	629	625	0.0527583	-0.31782	0.0288799	4.77476	0.802281	1.27771
CNAG_01904	-	vacuolar amino acid transporter 5	2462	2258	2638	2951	3068	3194	0.129169	-0.184196	0.0807126	3.05049	0.880139	0.888843
CNAG_01905	KSP1	serine/threonine protein kinase	6595	7902	5843	5707	5711	6417	1.84e-07	-0.701494	3.23e-08	30.5664	0.614935	6.73486
CNAG_01906	-	mitochondrial distribution and morphology protein 12	1063	1112	958	1485	1418	1569	0.989144	0.00265007	0.980825	0.000577685	1.00184	0.00474028
CNAG_01907	CDC5	PLK/PLK1 protein kinase	2845	2856	2897	3192	3702	3341	0.0598782	-0.252736	0.0334473	4.52274	0.839303	1.22273
CNAG_01908	HEM4	uroporphyrinogen-III synthase	934	974	1135	1082	1044	1462	0.0765246	-0.281256	0.0441571	4.05054	0.822874	1.1162
CNAG_01909	-	signal transducer	592	629	547	698	737	726	0.154964	-0.217912	0.0996132	2.71173	0.859809	0.809768
CNAG_01910	-	hypothetical protein	1461	1658	1618	1520	1455	1797	1.55471e-05	-0.504078	3.79072e-06	21.3679	0.705111	4.80835
CNAG_01911	SEC6	exocyst complex component	1783	2071	1652	2147	2460	2607	0.451021	-0.120435	0.353086	0.862335	0.91991	0.345803
CNAG_01912	-	NAD synthetase	11754	11485	11331	13585	12428	12730	0.000768342	-0.343212	0.00026046	13.3353	0.788285	3.11445
CNAG_01913	-	hypothetical protein	199	237	220	687	614	707	9.43e-13	1.10193	7.66e-14	55.8899	2.14642	12.0255
CNAG_01914	-	mitochondrial protein	2258	2532	2274	2552	2382	2718	0.00021779	-0.396532	6.60183e-05	15.9217	0.759682	3.66196
CNAG_01915	-	ribonucleoside-diphosphate reductase subunit M2	14147	11323	15998	17208	13371	16102	0.0294757	-0.340969	0.0148991	5.92836	0.789511	1.53054
CNAG_01916	MSH6	DNA mismatch repair protein msh6	2911	2249	3353	3248	2920	3205	0.0226027	-0.370433	0.0110359	6.45952	0.77355	1.64584
CNAG_01917	-	ribonuclease P protein subunit POP4	676	736	596	1085	1035	1158	0.180513	0.195849	0.118788	2.43322	1.1454	0.743491
CNAG_01918	BUD6	cytoskeletal regulatory protein binding protein	1714	2237	1949	2952	2779	3431	0.437004	0.119761	0.338763	0.915107	1.08656	0.359515
CNAG_01919	-	hypothetical protein	1387	1567	1409	2013	2124	2399	0.610108	0.0710112	0.517988	0.417898	1.05045	0.214594
CNAG_01920	UBI4	Polyubiquitin	29302	25004	24300	39994	36689	44566	0.357441	0.112202	0.265445	1.24014	1.08088	0.446795
CNAG_01921	-	hypothetical protein	121	97	127	216	171	179	0.45746	0.20634	0.359252	0.840507	1.15376	0.339647
CNAG_01922	PHO80	alternative cyclin Pho80	1160	1343	1114	1413	1520	1666	0.257985	-0.164671	0.180206	1.79593	0.892132	0.588405
CNAG_01923	-	ATPase GET3	4695	5088	4302	4016	4670	4924	9.94804e-06	-0.559331	2.34359e-06	22.2905	0.678617	5.00226
CNAG_01924	-	hypothetical protein	1122	1628	1029	1727	2051	2187	0.509108	0.147169	0.411643	0.67405	1.10739	0.29319
CNAG_01925	-	hypothetical protein	177	313	195	524	448	584	0.00650268	0.666323	0.00273604	8.97563	1.58702	2.18691
CNAG_01926	PEX5	peroxisome targeting signal receptor	704	797	644	941	988	1099	0.940103	-0.0141451	0.913748	0.0117315	0.990243	0.0268245
CNAG_01927	-	hypothetical protein	659	624	642	880	763	837	0.315265	-0.144368	0.22824	1.45179	0.904776	0.501325
CNAG_01928	-	Xaa-Pro aminopeptidase	3222	3417	2971	3497	3499	4253	0.0124767	-0.287044	0.00565621	7.65669	0.81958	1.9039
CNAG_01929	-	hypothetical protein	238	175	276	527	479	593	0.000518495	0.701244	0.000169899	14.1378	1.62591	3.28526
CNAG_01930	-	endopeptidase	1671	1762	1628	5872	5277	5869	1.14e-36	1.23895	1.89e-38	168.138	2.36026	35.9443
CNAG_01931	-	hypothetical protein	16	13	20	36	22	43	0.392348	0.519197	0.297795	1.08404	1.43316	0.406328
CNAG_01933	-	hypothetical protein	0	0	0	0	4	6	0.204366	3.64904	0.137098	2.21023	12.545	0.689592
CNAG_01934	-	hypothetical protein	50	21	48	187	123	218	1.45509e-05	1.62755	3.52457e-06	21.5075	3.08989	4.83711
CNAG_01936	-	Sugar transporter	56	22	54	153	119	156	0.00188455	1.18399	0.000702334	11.4831	2.27204	2.72479
CNAG_01937	-	hypothetical protein, variant	30	16	37	53	21	37	0.888692	-0.0974829	0.846842	0.0373067	0.934662	0.0512485
CNAG_01938	KIN1	CAMK/CAMKL/KIN1 protein kinase	5635	5852	5487	6970	6733	7915	0.0913506	-0.163921	0.0538916	3.71605	0.892596	1.03929
CNAG_01939	-	hypothetical protein	103	99	91	380	336	314	9.71e-10	1.3085	1.19e-10	41.4759	2.47685	9.01299
CNAG_01940	-	alpha-amylase, variant	818	933	860	1534	1607	1768	0.0012886	0.39966	0.00046122	12.2663	1.3192	2.88988
CNAG_01941	-	glucan synthesis regulatory protein	4145	4130	4536	8919	8065	8723	9.53e-07	0.495244	1.88e-07	27.1514	1.40956	6.02104
CNAG_01942	-	hypothetical protein	412	591	277	1240	1189	1352	1.29725e-05	1.04987	3.11193e-06	21.7463	2.07034	4.88698
CNAG_01943	-	hypothetical protein	9545	8473	8508	8839	8607	9680	5.31e-07	-0.478494	1.01e-07	28.3631	0.717726	6.27455
CNAG_01944	-	hypothetical protein	8	16	15	30	23	33	0.339967	0.622152	0.249677	1.32511	1.53917	0.468563
CNAG_01945	-	hypothetical protein	9	7	6	62	53	74	4.36e-07	2.58587	8.17e-08	28.7647	6.00376	6.36065
CNAG_01946	-	allantoate permease	1704	1614	1483	2772	2942	3713	0.000366325	0.457951	0.000115802	14.8598	1.37359	3.43613
CNAG_01947	-	2,4-dienoyl-CoA reductase	278	283	249	575	442	541	0.0132366	0.430881	0.00603809	7.5389	1.34806	1.87822
CNAG_01948	FZC36	nuclear protein	2531	3130	2657	2497	2237	2336	1.23e-08	-0.743613	1.79e-09	36.1865	0.597242	7.91134
CNAG_01949	-	chlorophyll synthesis pathway protein BchC	1136	710	776	1098	949	991	0.158002	-0.294158	0.101857	2.67622	0.815548	0.801336
CNAG_01950	-	hypothetical protein	1813	2080	1902	2355	2104	2450	0.0259423	-0.25877	0.0129026	6.18242	0.8358	1.58599
CNAG_01951	-	small subunit ribosomal protein S22-A, variant	130327	96657	113932	78661	79604	88539	5.03e-15	-0.975968	3.24e-16	66.6541	0.508399	14.2983
CNAG_01952	-	aryl-alcohol dehydrogenase, variant	707	560	486	1419	1014	1355	0.00117051	0.5971	0.000414924	12.4638	1.51267	2.93163
CNAG_01953	-	hypothetical protein	578	452	535	834	563	594	0.488329	-0.159604	0.390159	0.738448	0.895271	0.311288
CNAG_01954	-	aldo-keto reductase	24	27	29	249	202	150	2.26e-12	2.4105	1.92e-13	54.0845	5.31659	11.6458
CNAG_01955	-	Alcohol dehydrogenase	0	0	0	0	0	0	1		1
CNAG_01956	-	hypothetical protein	1602	1348	1394	1570	1429	1696	0.00079243	-0.400032	0.000269316	13.2726	0.757842	3.10104
CNAG_01957	-	20S proteasome subunit beta 7	7824	6969	6922	7274	7423	8176	1.4564e-05	-0.435282	3.53131e-06	21.5038	0.739549	4.83672
CNAG_01958	-	HET-C2 protein	8372	6534	6905	8830	8792	8898	0.0955992	-0.224675	0.0567859	3.62885	0.855788	1.01955
CNAG_01959	YCS4	condensin complex subunit 1	3214	3124	3462	3913	3838	3408	0.0220539	-0.315841	0.0107137	6.51219	0.803382	1.65652
CNAG_01960	-	efflux protein EncT	101	62	91	300	361	307	2.32e-08	1.42861	3.57e-09	34.8469	2.69188	7.63509
CNAG_01961	-	MSP domain-containing protein	12436	12154	10940	14244	14562	15872	0.093401	-0.179639	0.0552619	3.67416	0.882924	1.02965
CNAG_01962	-	ubiquinone biosynthesis protein COQ4, mitochondrial	1204	1098	1100	1164	1224	1492	0.0114116	-0.324305	0.00512843	7.83359	0.798683	1.94265
CNAG_01963	-	CMP/dCMP deaminase zinc-binding protein	438	287	386	228	192	252	1.77e-09	-1.23934	2.26e-10	40.2261	0.423565	8.75227
CNAG_01964	OPT1	OPT family small oligopeptide transporter	457	504	575	1192	1039	1254	2.21432e-06	0.668626	4.67e-07	25.3947	1.58956	5.65476
CNAG_01965	-	hypothetical protein	253	198	248	231	152	167	0.000386775	-0.854181	0.000123123	14.7442	0.553179	3.41254
CNAG_01968	-	hypothetical protein	25	94	52	115	84	130	0.412895	0.420303	0.316994	1.00131	1.33821	0.384161
CNAG_01969	-	zinc metalloprotease	210	199	240	666	682	665	4.69e-12	1.12633	4.15e-13	52.5699	2.18303	11.3288
CNAG_01970	-	hypothetical protein	2981	5180	2808	4652	5188	5823	1	0.000254703	0.999008	1.54714e-06	1.00018	0
CNAG_01971	-	hypothetical protein	5	0	8	10	7	5	0.866208	0.263186	0.816683	0.0537373	1.20013	0.0623777
CNAG_01972	TAF10	C2H2 zinc finger protein Zas1A, variant	953	997	1105	1891	1654	2211	0.00205192	0.397151	0.000771774	11.3079	1.3169	2.68784
CNAG_01973	ZFC2	C2H2 zinc finger protein Zas1A	7341	7085	6480	11845	11227	11273	0.0704693	0.209175	0.0401671	4.21081	1.15603	1.152
CNAG_01974	-	large subunit ribosomal protein L36	2635	2033	2393	2216	2079	2490	6.55823e-06	-0.569877	1.4926e-06	23.1575	0.673674	5.18321
CNAG_01975	-	helicase	1634	1509	1953	2445	2345	2503	0.965918	0.00798828	0.948341	0.00419775	1.00555	0.0150595
CNAG_01976	-	large subunit ribosomal protein L23	86275	62981	72568	61328	61201	64343	6.87e-09	-0.755149	9.71e-10	37.3818	0.592485	8.16313
CNAG_01977	FZC39	hypothetical protein	14	15	33	104	73	110	0.000157637	1.69169	4.64403e-05	16.5882	3.23036	3.80234
CNAG_01978	RCE1	Ras processing enzyme 1, putative	463	434	500	631	602	697	0.787877	-0.0456485	0.721227	0.12732	0.968854	0.103542
CNAG_01979	-	transcription initiation factor TFIID subunit 10	1471	1555	1497	2178	2146	2572	0.431121	0.0948808	0.333319	0.935958	1.06798	0.365401
CNAG_01980	-	hypothetical protein	0	0	0	0	0	0	1		1
CNAG_01981	-	sulfide:quinone oxidoreductase	15361	11327	12614	17981	16830	16773	0.477749	-0.113436	0.378945	0.774123	0.924384	0.320801
CNAG_01982	-	hypothetical protein	808	711	850	2119	1801	2154	5.24e-12	0.846076	4.66e-13	52.3425	1.7976	11.2809
CNAG_01983	RCV1	Protein required for cytokinesis and virulence 1	2207	2256	2134	3948	4089	4269	0.000142707	0.39054	4.17085e-05	16.792	1.31088	3.84555
CNAG_01984	TAL1	transaldolase	77187	72466	64910	103931	97165	109298	0.866962	0.0219541	0.817539	0.0532275	1.01533	0.0620002
CNAG_01985	-	hypothetical protein	15560	12892	12903	25303	23327	23274	0.0230829	0.291879	0.0113016	6.41727	1.22423	1.63671
CNAG_01986	-	hypothetical protein	1474	2011	1391	2754	2484	2755	0.259868	0.201603	0.181745	1.7833	1.14998	0.585247
CNAG_01987	-	carbohydrate binding protein	2882	2913	2776	3048	3032	3538	0.000386373	-0.346317	0.000122948	14.7469	0.78659	3.41299
CNAG_01988	PHY1	bacteriophytochrome histidine kinase, variant	4214	4691	4000	6099	6327	7331	0.432367	0.101553	0.334814	0.930187	1.07293	0.364148
CNAG_01989	-	hypothetical protein	70	85	65	245	190	258	3.24063e-06	1.13893	7.02e-07	24.6094	2.20217	5.48937
CNAG_01990	-	small subunit ribosomal protein S5	286141	187564	225382	184260	173139	190256	1.26e-08	-0.860926	1.85e-09	36.1276	0.550599	7.89967
CNAG_01991	-	cytochrome c oxidase subunit 4	29930	25269	23269	20678	21124	22959	4.11e-11	-0.786486	4.26e-12	48.0029	0.579755	10.3866
CNAG_01992	-	hypothetical protein	55	34	78	669	463	592	1.94e-24	2.85494	5.97e-26	110.981	7.23475	23.7131
CNAG_01993	-	hypothetical protein	1110	728	939	3354	3221	3387	2.75e-17	1.33545	1.38e-18	77.421	2.52353	16.5612
CNAG_01994	-	hypothetical protein	22	16	21	139	128	107	3.59e-09	2.16254	4.82e-10	38.7496	4.47702	8.4455
CNAG_01995	-	hypothetical protein	26	22	20	25	26	23	0.509451	-0.382821	0.412108	0.67271	0.766936	0.292898
CNAG_01996	-	hypothetical protein, variant	872	983	904	3107	2996	3273	1.51e-31	1.2543	3.11e-33	144.266	2.38552	30.8199
CNAG_01997	-	prephenate dehydrogenase (NADP)	2997	2965	2789	2813	2761	3242	2.3e-07	-0.501989	4.11e-08	30.097	0.706132	6.6383
CNAG_01999	-	hypothetical protein	717	773	1005	1213	1083	1166	0.85838	-0.0371162	0.806664	0.0598935	0.974601	0.0663202
CNAG_02000	-	Short-chain dehydrogenase	1615	2179	1413	2615	2824	2968	0.354357	0.180904	0.262424	1.25593	1.13359	0.450559
CNAG_02001	INP5203	inositol-polyphosphate 5-phosphatase	1940	2246	2042	3437	3266	3885	0.0276111	0.252085	0.0138514	6.05699	1.19093	1.55892
CNAG_02002	-	hypothetical protein	11944	10369	10570	10113	10214	10870	7.32e-09	-0.584821	1.04e-09	37.2534	0.666732	8.13567
CNAG_02004	-	OTU domain-containing protein 6B	5439	5944	5069	9933	9056	11482	0.000762745	0.373757	0.000258093	13.3524	1.29572	3.11762
CNAG_02005	-	hypothetical protein	28	43	28	37	33	50	0.637217	-0.243134	0.548917	0.359261	0.844908	0.195713
CNAG_02006	-	protein N-terminal amidase	2427	3020	1974	2425	2784	3092	0.0535971	-0.350495	0.0294445	4.74144	0.784315	1.27086
CNAG_02007	ADK1	adenylate kinase 1	29129	22976	25321	25879	25771	27080	3.69101e-05	-0.483939	9.62577e-06	19.5843	0.715023	4.43285
CNAG_02008	OVA1	nuclear protein	12463	7055	8659	27105	21576	20940	0.000100882	0.801575	2.85937e-05	17.5091	1.743	3.99619
CNAG_02009	-	extensin	1139	1515	1417	1815	1922	2003	0.942966	-0.0141521	0.917227	0.010801	0.990238	0.025504
CNAG_02010	-	tartrate transporter, variant	919	498	917	1288	1227	1385	0.348189	0.231188	0.256871	1.28554	1.1738	0.458185
CNAG_02011	-	PQQ enzyme repeat protein	459	471	539	761	619	704	0.976691	-0.00640509	0.963722	0.00206879	0.99557	0.0102427
CNAG_02012	-	TPR repeat-containing protein	1766	1500	1700	3895	3837	4127	5.36e-12	0.746627	4.79e-13	52.2909	1.67787	11.2707
CNAG_02013	-	hypothetical protein, variant	423	488	397	522	605	775	0.92054	0.0232301	0.888735	0.0195736	1.01623	0.0359574
CNAG_02016	-	hypothetical protein	6	14	8	35	21	39	0.0648615	1.23716	0.0365738	4.37015	2.35733	1.18801
CNAG_02017	-	hypothetical protein	136	97	103	168	175	282	0.209331	0.372661	0.14133	2.16342	1.29474	0.679166
CNAG_02018	-	hypothetical protein	265	224	297	3224	2790	2776	5.42e-81	2.97703	2.33e-83	374.154	7.87365	80.2661
CNAG_02020	-	SWR1-complex protein 4	2479	2587	2049	3093	2699	3163	0.194155	-0.180386	0.129293	2.30097	0.882467	0.711852
CNAG_02021	-	N-terminal acetyltransferase A complex catalytic subunit ard1	3199	2452	2517	3338	3128	4192	0.410858	-0.132423	0.314875	1.01012	0.912298	0.386308
CNAG_02022	-	DNA-directed RNA polymerase II subunit RPB3	5302	5254	5187	5712	6135	7152	0.0246688	-0.241656	0.0121994	6.28166	0.845774	1.60785
CNAG_02023	-	hypothetical protein, variant	103	144	108	231	166	252	0.200149	0.350469	0.1339	2.24669	1.27498	0.698647
CNAG_02024	-	hypothetical protein	3069	3552	3258	3468	3370	3401	9.21898e-05	-0.456357	2.58784e-05	17.6988	0.728825	4.03532
CNAG_02025	-	DNA-directed RNA polymerase III subunit RPC3	3283	3016	3384	3756	3562	3676	0.00295791	-0.324734	0.00115691	10.5579	0.798445	2.52901
CNAG_02026	-	hypothetical protein	130	114	97	284	299	317	2.46999e-05	0.890849	6.23496e-06	20.4147	1.85427	4.6073
CNAG_02027	-	hypothetical protein	1053	1160	1156	2457	2168	2529	1.84e-07	0.574133	3.22e-08	30.5691	1.48878	6.73516
CNAG_02028	SKY1	CMGC/SRPK protein kinase	3508	3572	3123	3503	3517	3963	0.000148688	-0.405154	4.35845e-05	16.7085	0.755156	3.82772
CNAG_02029	WSP1	wiskott-Aldrich syndrome protein	1846	2494	1629	2722	2671	3267	0.921847	0.0216239	0.891331	0.018665	1.0151	0.0353411
CNAG_02030	-	glyoxal oxidase	20942	20865	17560	38712	38314	33466	0.0061615	0.393703	0.00257657	9.08541	1.31376	2.21031
CNAG_02031	-	hypothetical protein	0	0	1	5	5	2	0.193384	2.99569	0.128661	2.30859	7.97611	0.71358
CNAG_02032	-	nuclear export factor	2627	2974	2654	3509	3521	3667	0.271799	-0.13522	0.19132	1.70742	0.910531	0.565752
CNAG_02033	-	hypothetical protein	2633	2016	1880	2779	2283	2687	0.105399	-0.263812	0.0636698	3.43911	0.832884	0.977162
CNAG_02034	BUR6	hypothetical protein	1414	1150	1233	1442	1049	1370	0.0011226	-0.489859	0.000396839	12.547	0.712095	2.94977
CNAG_02035	-	triose-phosphate isomerase	20358	18879	17278	28996	26081	28963	0.611899	0.0623518	0.51996	0.413972	1.04417	0.21332
CNAG_02036	CAS4	putative sugar transporter	1572	1034	1514	1814	1634	1634	0.303998	-0.202915	0.218364	1.51509	0.868794	0.517129
CNAG_02037	-	large subunit ribosomal protein L22	9270	7652	6567	8670	7637	8492	0.0029091	-0.431287	0.00113567	10.5922	0.7416	2.53624
CNAG_02038	-	hypothetical protein	5878	6137	5565	6496	6778	8348	0.0647008	-0.216353	0.0364673	4.37512	0.860739	1.18909
CNAG_02039	-	integral membrane protein, variant	41	48	28	28	17	24	0.00899362	-1.27708	0.0039345	8.3138	0.412629	2.04607
CNAG_02040	-	hypothetical protein	54	34	63	503	376	514	9.56e-27	2.69008	2.55e-28	121.803	6.45351	26.0197
CNAG_02041	-	hypothetical protein	1071	2965	1052	3295	3387	4523	0.320065	0.617444	0.232345	1.42645	1.53415	0.494762
CNAG_02043	-	hypothetical protein, variant	233	183	169	705	598	638	2.33e-11	1.22205	2.32e-12	49.1958	2.33278	10.6323
CNAG_02044	-	hypothetical protein	71	41	51	297	180	167	2.14328e-05	1.47985	5.33118e-06	20.7145	2.7892	4.66892
CNAG_02045	KBC1	acetoacetate-CoA ligase	228	197	227	674	613	548	6.5e-08	0.989406	1.07e-08	32.716	1.98537	7.18693
CNAG_02046	PBP1	poly(A)-binding protein binding protein	13103	12377	10897	15239	15012	16507	0.205123	-0.148007	0.137872	2.20155	0.902497	0.687986
CNAG_02047	-	hypothetical protein	807	1124	721	1604	1401	1586	0.152702	0.27967	0.0979989	2.73781	1.21392	0.816156
CNAG_02048	PUT5	Proline dehydrogenase	14256	10215	11366	14127	13198	14564	0.0482919	-0.284028	0.0260987	4.94947	0.821295	1.31613
CNAG_02049	PUT1	Proline dehydrogenase	28	34	8	91	101	117	0.000769983	1.62893	0.000261111	13.3306	3.09284	3.11352
CNAG_02050	QDR1	hypothetical protein, variant	990	904	1070	1234	1218	1221	0.15639	-0.197869	0.100708	2.6943	0.871838	0.805792
CNAG_02051	-	kinesin family member 20/23	2428	2692	2239	3583	3556	3420	0.930892	0.0146299	0.902327	0.0150606	1.01019	0.0311006
CNAG_02052	-	dimeric dihydrodiol dehydrogenase	9	6	22	28	23	34	0.358166	0.681445	0.266037	1.23707	1.60375	0.445916
CNAG_02053	-	hypothetical protein	24	14	26	387	331	402	3.99e-42	3.61675	5.15e-44	193.624	12.2673	41.3995
CNAG_02054	-	hypothetical protein	6297	5356	5793	3592	3479	4021	2.31e-31	-1.16495	4.81e-33	143.399	0.44598	30.6356
CNAG_02055	-	hypothetical protein	1412	1342	1244	1206	1051	1189	4.58e-10	-0.725127	5.42e-11	43.0188	0.604944	9.33924
CNAG_02056	-	hypothetical protein	166	156	148	306	272	357	0.0139548	0.476909	0.0064206	7.4283	1.39176	1.85528
CNAG_02057	URE6	urease accessory protein	1600	1341	1278	3689	3726	4471	2.27e-15	0.98126	1.41e-16	68.291	1.97419	14.6445
CNAG_02058	-	hypothetical protein	24	25	30	51	28	34	0.995238	0.00544767	0.990103	0.000153871	1.00378	0.00207291
CNAG_02059	-	CCR4-Not complex subunit Caf16	1650	1328	1628	1063	992	1133	2e-16	-1.04175	1.13e-17	73.2782	0.485737	15.6991
CNAG_02060	-	hypothetical protein	4007	1728	4311	3638	2292	3216	0.189767	-0.649434	0.12594	2.34185	0.637531	0.721779
CNAG_02061	-	hypothetical protein	342	308	414	1320	1111	1563	4.99e-18	1.39043	2.31e-19	80.9563	2.62156	17.3018
CNAG_02062	-	glycoside hydrolase family 2	856	828	938	2298	2310	2535	2.32e-17	0.935434	1.16e-18	77.7716	1.91247	16.6351
CNAG_02063	-	hypothetical protein	3573	4311	3305	5875	6084	6459	0.143704	0.209006	0.0912794	2.85166	1.15589	0.842531
CNAG_02064	-	TATA-box-binding protein-associated factor	6893	6542	7025	8841	8587	8332	0.137346	-0.173606	0.0866833	2.93491	0.886624	0.862185
CNAG_02065	-	hypothetical protein, variant	2926	2405	2884	2189	1972	2002	5.31e-13	-0.921512	4.22e-14	57.0614	0.527956	12.2749
CNAG_02066	FZC13	hypothetical protein	50	35	56	100	110	177	0.00866127	0.933437	0.00377206	8.39041	1.90982	2.06242
CNAG_02067	-	vacuolar protein	3310	2727	3289	4524	4110	4087	0.709257	-0.0582546	0.63016	0.231844	0.960425	0.149197
CNAG_02068	-	stromal membrane-associated protein	3957	3787	3417	2926	3027	3317	2.69e-13	-0.778201	2.09e-14	58.4427	0.583094	12.5704
CNAG_02069	-	hypothetical protein	327	833	270	705	803	1126	0.597383	0.357478	0.503278	0.448017	1.28118	0.223747
CNAG_02070	-	hypothetical protein	1329	7513	792	3777	4019	3840	0.853561	-0.239748	0.800981	0.0635431	0.846893	0.0687653
CNAG_02071	BNI4	putative scaffold protein	5594	5738	5938	12834	11880	12893	1.67e-11	0.612909	1.61e-12	49.9116	1.52934	10.7771
CNAG_02072	-	hypothetical protein	719	1019	719	1667	1557	2121	0.000723728	0.602354	0.000243734	13.4598	1.51819	3.14042
CNAG_02073	MLH1	DNA mismatch repair protein MLH1	1604	1219	1706	1780	1848	1971	0.218612	-0.202843	0.14851	2.08749	0.868837	0.660327
CNAG_02074	-	mitochondrial processing peptidase	7046	6265	6241	8249	7846	8222	0.0767528	-0.193575	0.0442982	4.04516	0.874436	1.11491
CNAG_02075	-	hypothetical protein	3384	3122	3249	3580	3479	3830	0.000210898	-0.35155	6.37128e-05	15.989	0.783742	3.67593
CNAG_02076	-	leukotriene A-4 hydrolase/aminopeptidase	12881	11410	11098	9733	10067	11935	3.52e-10	-0.670134	4.09e-11	43.568	0.628448	9.45386
CNAG_02077	-	elongator complex protein 5	1360	1257	1104	1248	1240	1278	0.000178947	-0.490787	5.33342e-05	16.3258	0.711637	3.74728
CNAG_02078	-	hydrolase	3258	3192	3198	4645	4055	5492	0.762156	0.0396901	0.690561	0.158479	1.02789	0.117956
CNAG_02079	-	cytoplasmic protein	8386	8144	7089	15959	14604	14390	0.000670298	0.422217	0.000224669	13.6126	1.33998	3.17373
CNAG_02080	-	hypothetical protein	2203	2057	2215	2578	2788	3059	0.277495	-0.130768	0.196161	1.67072	0.913345	0.556746
CNAG_02081	-	mannosyl-oligosaccharide alpha-1,2-mannosidase	6588	5885	6170	8680	7911	8474	0.48046	-0.0818062	0.38153	0.765767	0.944874	0.318343
CNAG_02082	DAD1	DASH complex subunit DAD1	644	563	567	855	602	619	0.160563	-0.279887	0.103765	2.64671	0.823655	0.794355
CNAG_02083	SIT2	siderochrome-iron transporter	393	147	692	722	439	737	0.90472	0.103214	0.868345	0.0274768	1.07416	0.0434856
CNAG_02084	ERG20	farnesyl diphosphate synthase	12894	10779	11697	12965	14153	15137	0.0326289	-0.252628	0.0167538	5.72199	0.839366	1.4864
CNAG_02085	HST302	histone deacetylase	1072	1099	893	1451	1412	1322	0.757684	-0.0554049	0.685204	0.164326	0.962324	0.120512
CNAG_02086	-	Acyl-CoA-dependent ceramide synthase	7275	5504	6837	7236	6747	7158	0.00252667	-0.400053	0.000969597	10.8847	0.75783	2.59745
CNAG_02087	-	Acyl-CoA-dependent ceramide synthase	69	58	79	173	193	294	4.48357e-05	1.15791	1.1825e-05	19.1913	2.23134	4.34838
CNAG_02088	-	hypothetical protein	6401	5145	6396	7966	7722	8170	0.487402	-0.097205	0.388999	0.742068	0.934842	0.312112
CNAG_02089	-	hypothetical protein	335	289	401	913	754	1104	2.24e-07	0.915799	4e-08	30.1478	1.88661	6.64899
CNAG_02090	GPA3	guanine nucleotide-binding protein G(o) subunit alpha	1694	1767	1666	2319	2270	2485	0.705083	-0.0460521	0.625151	0.238694	0.968583	0.15176
CNAG_02091	NAP1	Nucleosome assembly protein 1	37080	30515	32645	45003	42791	47861	0.549097	-0.0737084	0.452821	0.563581	0.950192	0.260351
CNAG_02092	-	protein EFR3	3704	3926	3607	7634	7717	8404	2.63e-09	0.569576	3.47e-10	39.3908	1.48409	8.57971
CNAG_02093	-	hypothetical protein	2466	2045	2132	2701	2275	2822	0.0238706	-0.281933	0.0117607	6.3466	0.822488	1.62214
CNAG_02094	ARC35	ARP2/3 complex 34 kDa subunit	4236	5421	4669	6040	6786	7724	0.969831	0.00743227	0.953733	0.0033663	1.00516	0.0133039
CNAG_02095	-	cyclin	10954	10831	10170	10908	12038	11076	0.000532524	-0.414094	0.000174889	14.0833	0.75049	3.27366
CNAG_02096	-	peroxin-16	463	513	522	842	855	1024	0.013585	0.347317	0.00622209	7.48483	1.27219	1.86694
CNAG_02097	-	hypothetical protein	1426	1757	1448	2039	2259	2485	0.820849	0.0389669	0.761693	0.0919659	1.02738	0.0857367
CNAG_02099	FAS1	fatty acid synthase subunit beta, fungi type	51024	45958	41579	44885	46042	49243	9.41027e-06	-0.492527	2.19723e-06	22.4144	0.710779	5.0264
CNAG_02100	FAS2	fatty acid synthase subunit alpha, fungi type	48158	38844	39652	45571	46920	46509	0.00296616	-0.37195	0.00116123	10.551	0.772737	2.52781
CNAG_02101	-	hypothetical protein	1709	1370	1513	2235	1868	2104	0.627222	-0.0750866	0.537993	0.379271	0.949285	0.202579
CNAG_02102	-	hypothetical protein	89	88	56	163	136	144	0.180625	0.418222	0.118929	2.43137	1.33628	0.743221
CNAG_02103	-	hypothetical protein, variant	739	830	874	3610	3361	3909	7.81e-49	1.64245	7.87e-51	224.861	3.12195	48.1074
CNAG_02104	SFH5	phosphatidylinositol transfer protein SFH5	1031	1070	1091	1039	971	1355	0.00102384	-0.442283	0.000357898	12.7401	0.735969	2.98977
CNAG_02105	-	methylated-DNA-protein-cysteine methyltransferase, variant	586	423	502	433	362	412	1.55478e-06	-0.83406	3.17e-07	26.1447	0.560949	5.80833
CNAG_02106	-	mitochondrial intermembrane space import and assembly protein 40	3988	3721	3646	3345	3193	3689	8.38e-13	-0.662737	6.8e-14	56.1245	0.631679	12.0766
CNAG_02107	-	hypothetical protein	440	488	488	1005	906	1184	6.20905e-06	0.611999	1.40931e-06	23.2679	1.52838	5.20697
CNAG_02108	-	GTPase activating protein	1248	1391	1285	1719	1583	1809	0.289941	-0.130565	0.206805	1.59365	0.913473	0.53769
CNAG_02109	INP5201	type I inositol-1,4,5-trisphosphate 5- phosphatase 1	2678	3308	2324	5051	4725	5370	0.0203533	0.353925	0.00978545	6.67354	1.27803	1.69137
CNAG_02110	-	peptide alpha-N-acetyltransferase	6565	6500	6688	8270	8659	8855	0.249848	-0.123706	0.173784	1.84999	0.917827	0.602324
CNAG_02111	-	protein Clp1	2546	2552	2689	2513	2662	2898	9.8279e-06	-0.458418	2.31046e-06	22.3179	0.727784	5.00754
CNAG_02112	-	ubiquitin-conjugating enzyme E2 W	1122	689	856	1293	1369	1293	0.780382	0.0645435	0.712159	0.13613	1.04575	0.107693
CNAG_02113	-	clathrin assembly protein	3088	2396	2764	3432	3606	3826	0.445882	-0.11118	0.347529	0.88246	0.925831	0.35078
CNAG_02114	-	hypothetical protein	3281	3243	3512	7232	6046	7786	9.28e-08	0.554464	1.56e-08	31.9794	1.46862	7.03227
CNAG_02115	NHP6B02/HMO1	Non-histone chromosomal protein 6, putative	1283	1448	1254	1394	1474	1577	0.00531656	-0.352643	0.00217814	9.39301	0.783148	2.27437
CNAG_02116	-	arf/Sar family protein	461	576	530	1043	962	1288	0.000255008	0.55385	7.82927e-05	15.5991	1.468	3.59345
CNAG_02117	-	NAD-binding Rossmann fold oxidoreductase	2737	2495	2506	4020	3840	4433	0.131716	0.156103	0.082709	3.01085	1.11427	0.880362
CNAG_02118	-	hypothetical protein	5	2	5	100	100	140	3.33e-18	4.3064	1.53e-19	81.771	19.7859	17.4773
CNAG_02119	-	hypothetical protein	1601	1669	1554	2154	2188	2360	0.783098	-0.0357423	0.715312	0.133029	0.97553	0.106184
CNAG_02120	-	TIGR01456 family HAD hydrolase	3732	3823	3850	3171	3083	3441	6.59e-17	-0.745385	3.47e-18	75.5998	0.596509	16.1814
CNAG_02121	-	hypothetical protein	1828	2409	1902	2717	2715	3369	0.986474	0.00392792	0.976771	0.000847816	1.00273	0.00591415
CNAG_02122	-	cytoplasmic tRNA 2-thiolation protein 1	1532	1547	1723	1909	1554	2025	0.0100924	-0.322667	0.00447971	8.07836	0.79959	1.99601
CNAG_02123	-	methionyl-tRNA formyltransferase	1865	1713	1901	3357	3156	3086	0.0141187	0.302862	0.00650296	7.40537	1.23359	1.85021
CNAG_02124	-	hypothetical protein	801	930	875	3261	2875	3428	7.61e-34	1.36259	1.36e-35	155.062	2.57146	33.1184
CNAG_02125	-	hypothetical protein, variant	38	27	54	1014	935	1081	6.22e-87	4.15876	2.52e-89	401.556	17.8612	86.2061
CNAG_02126	-	hypothetical protein	2216	1851	2096	2605	2584	3103	0.527369	-0.0849003	0.430364	0.621841	0.94285	0.277885
CNAG_02127	-	cyclin-dependent protein kinase regulator	920	881	1022	1162	1001	1394	0.214798	-0.184239	0.145655	2.11718	0.880113	0.66797
CNAG_02128	HCR1	translation initiation factor 3 subunit J	20980	16186	18611	13887	13718	15380	3.07e-14	-0.88608	2.17e-15	62.9078	0.541082	13.5122
CNAG_02129	-	hypothetical protein	5871	16184	3771	19220	30094	23207	0.190043	0.986937	0.126158	2.33916	1.98197	0.721149
CNAG_02130	NSR1	RNA-binding protein 39	8781	9455	10123	10484	10161	13940	0.0771953	-0.232337	0.0445726	4.03474	0.851255	1.11241
CNAG_02131	ISA1	iron-sulfur cluster assembly protein	2031	2538	1884	3590	3305	3794	0.153324	0.215684	0.0984266	2.73086	1.16125	0.814391
CNAG_02132	-	hypothetical protein	433	447	397	832	762	921	0.000611561	0.464456	0.000203252	13.8008	1.3798	3.21356
CNAG_02133	SOL3	6-phosphogluconolactonase	13771	13068	10780	19035	17381	18994	0.742223	0.0490279	0.667389	0.184671	1.03457	0.129465
CNAG_02134	RSC8	rsc chromatin remodeling complex subunit	8364	8364	8335	9266	8510	9711	7.45184e-06	-0.378246	1.71063e-06	22.8954	0.769372	5.12774
CNAG_02135	-	protein transporter SEC20	754	744	676	800	740	1005	0.0445856	-0.289818	0.0238744	5.10374	0.818005	1.35081
CNAG_02136	-	small subunit ribosomal protein S6	5613	4613	5059	4465	4240	5024	6.14e-10	-0.667128	7.4e-11	42.4091	0.629759	9.21193
CNAG_02137	-	hypothetical protein	1354	1582	1629	2023	1807	2162	0.384554	-0.12099	0.290567	1.11699	0.919557	0.415043
CNAG_02138	DNA2	DNA replication ATP-dependent helicase dna2	326	356	427	497	451	543	0.663227	-0.086357	0.577112	0.310926	0.941898	0.178338
CNAG_02139	-	oxysterol-binding protein	7885	7555	6666	10514	9874	10240	0.78518	-0.0376272	0.717794	0.130617	0.974256	0.105031
CNAG_02140	-	NADH dehydrogenase (ubiquinone) 1 alpha subcomplex 12	14386	10886	11129	11163	10908	11730	2.76364e-06	-0.615505	5.93e-07	24.935	0.652702	5.55852
CNAG_02141	-	hypothetical protein	518	475	497	612	551	694	0.179987	-0.196504	0.11842	2.43809	0.872663	0.744759
CNAG_02143	-	hypothetical protein	742	908	587	821	702	781	0.0136082	-0.468386	0.00623437	7.48128	0.722773	1.8662
CNAG_02144	-	large subunit ribosomal protein L1-A	197756	154569	162313	143230	141173	138931	4.15e-10	-0.787409	4.88e-11	43.2243	0.579384	9.38216
CNAG_02145	-	hypothetical protein	5412	4134	4669	4374	3851	5303	1.44337e-05	-0.588409	3.49439e-06	21.5239	0.665076	4.84062
CNAG_02146	-	hypothetical protein	0	0	0	5	3	16	0.0159309	4.8835	0.00742578	7.16698	29.5176	1.79776
CNAG_02147	-	cytochrome c peroxidase	521	439	450	689	543	565	0.410919	-0.15756	0.314977	1.00969	0.89654	0.386244
CNAG_02148	-	ubiquitin-conjugating enzyme E2 35, variant	3345	3043	2896	3586	3797	4187	0.100329	-0.192939	0.0600393	3.5363	0.874822	0.998575
CNAG_02149	-	hypothetical protein	147	142	164	76	68	98	6.63e-09	-1.42183	9.31e-10	37.4636	0.373238	8.17869
CNAG_02150	-	mRNA methyltransferase	242	323	299	951	942	1116	2.63e-16	1.28635	1.5e-17	72.7132	2.43909	15.5804
CNAG_02151	-	amidohydrolase	2119	1753	1690	2718	2527	2918	0.781374	0.0422699	0.713353	0.134951	1.02973	0.107141
CNAG_02152	-	hypothetical protein	1342	1314	1534	2469	2061	2354	0.122798	0.205293	0.0762634	3.14279	1.15292	0.91081
CNAG_02153	TUP1	glucose repression regulatory protein TUP1	6654	5967	5804	8134	7510	8901	0.378477	-0.0986243	0.284474	1.14559	0.933923	0.421961
CNAG_02154	-	anaphase-promoting complex subunit 6	2369	2343	2113	3529	3149	3256	0.818764	0.0335808	0.757656	0.0952095	1.02355	0.0868414
CNAG_02155	-	hypothetical protein	33	16	37	138	109	125	2.28382e-05	1.60325	5.71445e-06	20.5815	3.03827	4.64134
CNAG_02156	-	hypothetical protein	410	430	372	1982	1460	2029	1.47e-29	1.65743	3.37e-31	134.958	3.15454	28.8338
CNAG_02157	-	hypothetical protein	773	912	936	885	935	995	0.00405209	-0.40723	0.00162422	9.93209	0.75407	2.39232
CNAG_02159	-	hypothetical protein	594	447	698	1873	1936	1956	1.1e-12	1.22209	8.99e-14	55.5766	2.33285	11.9602
CNAG_02160	-	hypothetical protein, variant	137	81	106	661	617	828	3.02e-25	2.18466	8.72e-27	114.798	4.54619	24.5205
CNAG_02161	ASP1	Inositol heptakisphosphate kinase	3887	3671	3685	3517	3380	3797	7.66e-11	-0.583145	8.21e-12	46.7143	0.667507	10.1158
CNAG_02162	-	U3 small nucleolar RNA-associated protein 24	2693	1786	2418	2126	1752	1919	5.99363e-06	-0.758931	1.35526e-06	23.3431	0.590934	5.22231
CNAG_02163	-	hypothetical protein	1324	1004	1083	1171	1055	1134	0.000265592	-0.530228	8.17851e-05	15.5166	0.692445	3.57579
CNAG_02164	-	hypothetical protein	1089	1443	1113	4334	4227	5443	1.14e-22	1.42486	3.96e-24	102.671	2.68489	21.9413
CNAG_02165	-	cytoplasmic protein	1390	2130	1591	3807	4251	4666	3.36685e-06	0.803562	7.31e-07	24.5314	1.74541	5.47278
CNAG_02166	-	DNA-directed RNA polymerase II subunit RPB1	17836	17740	16341	20684	21057	21693	0.0330087	-0.219173	0.0169772	5.69873	0.859058	1.48137
CNAG_02167	VPS27	vacuolar protein sorting-associated protein 27	1900	2471	1747	3797	3631	3871	0.0176467	0.374918	0.00832756	6.96164	1.29677	1.75334
CNAG_02168	-	Glucoamylase	1956	2121	1819	4683	4205	4908	2.44e-11	0.714086	2.43e-12	49.1044	1.64044	10.6132
CNAG_02169	-	hypothetical protein	19	24	22	201	216	264	6.6e-23	2.87444	2.24e-24	103.799	7.33317	22.1806
CNAG_02170	-	hypothetical protein	113	65	128	243	234	285	0.00444126	0.803697	0.00179496	9.74822	1.74557	2.35249
CNAG_02171	-	DNA polymerase eta subunit	1099	1198	1222	1374	1515	1545	0.19809	-0.175232	0.132328	2.26498	0.885625	0.703137
CNAG_02172	-	ubiquitin-protein ligase	2627	3194	2554	4605	4413	4683	0.144963	0.200357	0.092257	2.83454	1.14898	0.838744
CNAG_02173	-	transporter particle component	1136	1339	890	1486	1583	1861	0.864317	0.037292	0.813837	0.0554501	1.02619	0.0633269
CNAG_02174	-	signal recognition particle protein SRP54, variant 2	7119	7263	7432	8290	8576	9808	0.0239366	-0.221942	0.0117991	6.34082	0.857411	1.62094
CNAG_02175	-	5'-3' exoribonuclease 1	3874	4433	3502	5573	5566	5920	0.895842	0.0208664	0.856409	0.0327421	1.01457	0.0477686
CNAG_02176	-	hypothetical protein	338	431	661	1038	1015	1657	0.00098275	0.849706	0.000341066	12.8302	1.80213	3.00756
CNAG_02177	PPH22	serine/threonine-protein phosphatase PP2A catalytic subunit	11722	11242	11863	13453	13245	14648	0.00273321	-0.262966	0.0010586	10.7222	0.833373	2.56333
CNAG_02178	-	hypothetical protein	1317	1382	1509	2871	2795	3059	6.88e-07	0.541577	1.32e-07	27.831	1.45556	6.16213
CNAG_02179	-	Hemolysin	1700	1978	1460	2887	2925	3334	0.0288446	0.31961	0.0145411	5.97123	1.24799	1.53994
CNAG_02180	-	phosphate transporter	4797	4932	4172	5101	5105	5069	0.00209169	-0.371079	0.000787246	11.2711	0.773204	2.6795
CNAG_02181	-	dihydrokaempferol 4-reductase	2598	2084	2448	2563	2119	2799	0.000632564	-0.445858	0.00021101	13.7304	0.734147	3.1989
CNAG_02182	GRE2	D-lactaldehyde dehydrogenase	6811	7757	5788	25996	24252	17029	5.48e-10	1.22845	6.55e-11	42.6483	2.34314	9.26148
CNAG_02183	-	anaphase-promoting complex subunit 1	1350	1352	1454	2093	2031	2248	0.369999	0.10586	0.276555	1.18394	1.07614	0.4318
CNAG_02184	-	hypothetical protein	1	2	3	22	13	17	0.00989506	2.60151	0.00438118	8.11867	6.06921	2.00458
CNAG_02185	-	nuclear protein	1475	1369	1464	1079	1110	1236	7.45e-15	-0.84183	4.88e-16	65.8443	0.557935	14.1281
CNAG_02186	-	myosin regulatory light chain	317	223	313	370	348	400	0.594225	-0.120541	0.499607	0.45577	0.919842	0.226049
CNAG_02187	-	terbinafine resistance locus protein	1281	1354	1378	1821	1731	2050	0.809761	-0.0317504	0.747334	0.103785	0.978233	0.0916432
CNAG_02188	-	hypothetical protein	376	597	320	368	384	462	0.0160713	-0.606365	0.00750496	7.14795	0.65685	1.79395
CNAG_02189	-	Alpha-amylase	10925	10777	9553	13589	13115	11743	0.150641	-0.204504	0.0964633	2.76306	0.867837	0.822058
CNAG_02190	-	hypothetical protein	1323	1150	1172	1153	1086	1349	7.07294e-06	-0.536627	1.6181e-06	23.0023	0.689381	5.1504
CNAG_02191	-	hypothetical protein	1507	1473	1418	1574	1585	2140	0.0681442	-0.248805	0.038626	4.27724	0.841593	1.16657
CNAG_02192	-	hypothetical protein	3	11	30	37	54	109	0.0276653	1.64706	0.0138888	6.05222	3.13194	1.55806
CNAG_02193	-	kinetochore protein Spc25, fungi type	1972	1617	1977	1709	1665	1523	1.64621e-06	-0.688512	3.37e-07	26.0274	0.620493	5.78351
CNAG_02194	DBF20	AGC/NDR protein kinase	2367	2103	2050	3286	3535	2924	0.652996	0.0791175	0.565721	0.329895	1.05637	0.185089
CNAG_02195	ORC1	origin recognition complex subunit 1	618	550	623	896	763	713	0.604859	-0.0992733	0.511375	0.431253	0.933503	0.218346
CNAG_02196	CDC11	septin	5101	4232	4564	7346	6431	7062	0.574902	0.0752449	0.478696	0.501832	1.05354	0.240406
CNAG_02197	-	hypothetical protein	2972	3066	2783	3434	3235	3748	0.00686575	-0.272235	0.00291075	8.86259	0.828036	2.16331
CNAG_02198	-	mitochondrial inner membrane protease ATP23	626	482	568	392	350	366	8.71e-12	-1.10507	8.03e-13	51.2738	0.46488	11.0599
CNAG_02199	-	hypothetical protein	306	350	403	567	466	598	0.592043	0.107997	0.496827	0.461708	1.07773	0.227647
CNAG_02200	ALL2	hypothetical protein	1771	1647	1503	1963	1744	1983	0.0114453	-0.301435	0.00514496	7.82777	0.811445	1.94137
CNAG_02201	-	hypothetical protein	831	945	601	1165	1113	1396	0.596789	0.112906	0.502571	0.449504	1.0814	0.224179
CNAG_02202	-	Adenylylsulfate kinase	6679	6320	6261	6135	6462	6605	2.54e-07	-0.512314	4.58e-08	29.8864	0.701097	6.5952
CNAG_02203	-	karyopherin/importin that interacts with the nuclear pore complex, variant	2065	2722	2272	2181	2282	2565	0.000226651	-0.518755	6.91407e-05	15.8342	0.697974	3.64464
CNAG_02204	-	endonuclease G, mitochondrial	6391	5042	5249	4143	4275	4010	3.59e-12	-0.929003	3.13e-13	53.128	0.525221	11.4449
CNAG_02205	RIM23	pH-response regulator protein palC, variant	948	877	968	2482	2283	2734	2.28e-18	0.912026	1.04e-19	82.5394	1.88169	17.6415
CNAG_02206	-	hypothetical protein, variant	4	4	5	14	30	17	0.0433205	1.73918	0.023101	5.16089	3.33845	1.36331
CNAG_02207	-	hypothetical protein	1252	1036	1239	1989	1727	1887	0.268673	0.158561	0.188762	1.72726	1.11617	0.570775
CNAG_02208	-	ribonucleoside-diphosphate reductase large subunit	15959	11418	16218	16487	14224	14279	0.00476016	-0.460325	0.00193731	9.60801	0.726823	2.32238
CNAG_02209	NOP56/SIK1	nucleolar protein 56	26679	23190	26112	23373	21761	22038	2.22e-10	-0.684676	2.52e-11	44.5198	0.622146	9.6539
CNAG_02210	TRZ1	ribonuclease Z	1045	1415	1080	1341	1516	1603	0.325993	-0.177343	0.237415	1.39588	0.88433	0.486792
CNAG_02211	-	hypothetical protein	645	999	650	843	853	1005	0.191272	-0.278827	0.127078	2.32784	0.824261	0.718349
CNAG_02212	TIF32	translation initiation factor 3 subunit A	45981	39289	40172	38833	37721	40094	1.69e-09	-0.613465	2.15e-10	40.3278	0.653625	8.77321
CNAG_02213	-	epsin	4193	5454	4311	7057	7635	8771	0.116405	0.235986	0.0716204	3.24549	1.17771	0.93403
CNAG_02214	UBC6-2	ubiquitin-conjugating enzyme E2 J1	202	251	263	514	520	576	0.000162065	0.657543	4.78244e-05	16.5325	1.57739	3.79031
CNAG_02215	HAP3	transcriptional activator, variant	857	669	832	1283	1055	1304	0.494858	0.114355	0.396714	0.718263	1.08249	0.305519
[truncated: 6,340 more rows]

## Sheet: Genes upregulated by EZT2oe
Supplementary Data 2. RNA sequencing data for transcriptome analysis of EZT1, EZT2, or CBF1 overexpression strains compared with the wild-type strain.
Locus_tag	Gene_name	Function	H99_1	H99_2	H99_3	EZT1_1	EZT1_2	EZT1_3	padj	log2FoldChange	pvalue	stat	foldChange	log10padj
CNAG_05064	-	hypothetical protein	28	7	20	328	317	398	7.82e-37	4.14614	1.58e-39	173.076	17.7057	36.1067
CNAG_04092	-	Sugar transporter	52	59	51	719	929	850	9.26e-94	3.83399	4.98e-97	436.956	14.2608	93.0332
CNAG_06817	UAP1	uric acid xanthine permease	296	202	275	3655	4074	3456	4.47e-146	3.74845	1.2e-149	678.829	13.4399	145.349
CNAG_12335	-	unspecified product	0	5	3	42	40	21	0.000138792	3.56737	4.73387e-06	20.9421	11.8546	3.85764
CNAG_04025	-	transaldolase	59	66	49	652	674	572	2.69e-64	3.33813	2.52e-67	300.531	10.1129	63.571
CNAG_00867	ITR3A	myo-inositol transporter, putative	43	24	37	383	385	298	5.26e-35	3.253	1.13e-37	164.58	9.53345	34.279
CNAG_05317	-	phytanoyl-CoA dioxygenase	704	713	702	5832	6264	5464	2.89e-174	2.94129	3.88e-178	809.857	7.68098	173.539
CNAG_05760	-	endoplasmic reticulum protein	17	33	29	196	245	216	1.87e-21	2.93981	6.54e-24	101.676	7.67312	20.7275
CNAG_12790	-	unspecified product	2	4	0	13	21	12	0.0421045	2.81555	0.00472777	7.98074	7.0399	1.37567
CNAG_05340	-	Monosaccharide transporter	362	342	488	2758	3145	2795	2.82e-74	2.7569	1.89e-77	347.018	6.75941	73.5505
CNAG_06823	-	hypothetical protein	13	16	11	92	113	79	2.85e-10	2.71435	2.91e-12	48.7517	6.56295	9.54567
CNAG_12675	-	unspecified product	58	59	67	318	443	423	1.31e-30	2.57264	3.53e-33	144.014	5.94895	29.8815
CNAG_07399	-	hypothetical protein	15	2	10	50	51	60	0.000243567	2.48046	8.93619e-06	19.7263	5.58074	3.61338
CNAG_07457	-	hypothetical protein	144	93	107	651	648	561	4.76e-33	2.33128	1.21e-35	155.282	5.03251	32.3223
CNAG_06503	-	uridine permease, variant	8	6	7	39	32	40	0.000806998	2.30014	3.61941e-05	17.0612	4.92507	3.09313
CNAG_06557	-	membrane protein	25	29	24	99	139	158	7.66e-10	2.23085	8.43e-12	46.6626	4.6941	9.11589
CNAG_06554	-	FAD dependent oxidoreductase	367	529	463	2211	2394	2238	4.19e-45	2.21834	6.75e-48	211.413	4.65357	44.3776
CNAG_02601	-	hypothetical protein	38	72	70	269	312	303	9.08e-15	2.18005	4.88e-17	70.3865	4.53169	14.0421
CNAG_00800	-	nicotinamidase	409	326	355	1681	1837	1747	6.79e-70	2.16525	5.47e-73	326.533	4.48544	69.1682
CNAG_08028	-	hypothetical protein	418	366	463	1589	1719	1850	1.08e-46	1.94083	1.6e-49	218.867	3.83926	45.966
CNAG_06556	-	oxidoreductase	21	14	46	117	111	100	8.49892e-05	1.9118	2.73901e-06	21.9912	3.76279	4.07064
CNAG_04351	-	methylmalonate-semialdehyde dehydrogenase (acylating)	1047	785	1001	3757	3832	3824	7e-54	1.9056	7.52e-57	252.469	3.74665	53.1549
CNAG_04130	EZT2	hypothetical protein	9228	8861	8871	33140	35687	37186	5.91e-99	1.86709	2.38e-102	461.403	3.64795	98.2286
CNAG_12846	-	unspecified product	20	7	4	32	32	53	0.0327387	1.82377	0.00332355	8.62075	3.54005	1.48494
CNAG_00864	ITR2	myo-inositol transporter, putative	37	52	37	160	194	129	3.08e-08	1.82312	4.38e-10	38.9352	3.53846	7.51173
CNAG_05072	-	endopeptidase	25	27	41	103	125	116	1.65508e-06	1.77502	3.36e-08	30.49	3.42242	5.78118
CNAG_12368	-	unspecified product	133	90	143	416	413	511	5.88e-15	1.76893	3.01e-17	71.3348	3.40801	14.2305
CNAG_13118	-	unspecified product	10	16	6	25	39	54	0.021857	1.76625	0.00199287	9.55609	3.40168	1.66041
CNAG_05662	PTP1	Polyol transporter protein 1	52	43	22	140	84	197	0.000302664	1.75283	1.15424e-05	19.2375	3.37019	3.51904
CNAG_06870	-	hypothetical protein	95	100	120	382	369	376	1.7e-17	1.73131	7.29e-20	83.2346	3.32029	16.7706
CNAG_06524	FRE3	hypothetical protein, variant	69	74	75	186	225	337	3.48e-08	1.66918	5.07e-10	38.6493	3.18033	7.45891
CNAG_01849	-	hypothetical protein	29	29	43	109	103	124	1.30222e-05	1.62738	3.22e-07	26.1145	3.08951	4.88531
CNAG_06659	HEX1	beta-hexosaminidase	912	777	814	2495	2852	2584	6.5e-49	1.55545	8.73e-52	229.241	2.93925	48.1872
CNAG_05982	-	MFS transporter, SP family, general alpha glucoside:H symporter	179	116	123	353	484	464	1.11e-11	1.53034	9.38e-14	55.4927	2.88855	10.9551
CNAG_06355	-	hypothetical protein	554	639	550	1690	1877	1796	3.17e-33	1.51021	7.67e-36	156.197	2.84852	32.4986
CNAG_12593	-	unspecified product	18	52	13	60	97	95	0.0266017	1.47438	0.00256122	9.09634	2.77865	1.57509
CNAG_13035	-	unspecified product	55	14	48	104	100	137	0.0064835	1.44867	0.000450981	12.3082	2.72956	2.18819
CNAG_04097	-	glucose 1-dehydrogenase	193	198	184	543	534	555	1.24e-17	1.39754	4.99e-20	83.9834	2.63452	16.9071
CNAG_01612	PSK202	CAMK/CAMKL protein kinase, variant	118	62	90	211	251	290	2.5274e-06	1.37475	5.36e-08	29.5812	2.59323	5.59733
CNAG_12880	-	unspecified product	46	30	43	80	125	125	0.00057048	1.36109	2.42073e-05	17.8258	2.56879	3.24376
CNAG_12914	-	unspecified product	67	49	95	150	176	254	0.000230081	1.35232	8.37277e-06	19.8508	2.55322	3.63812
CNAG_05066	-	hypothetical protein	104	70	94	235	241	246	6.26e-08	1.32539	9.91e-10	37.3421	2.506	7.20373
CNAG_06292	-	sugar transporter, variant 2	67	67	80	204	158	214	6.01201e-06	1.32531	1.37e-07	27.7617	2.50587	5.22098
CNAG_04471	-	FAD dependent oxidoreductase	300	210	192	670	641	573	4.92e-11	1.3219	4.62e-13	52.3599	2.49995	10.3084
CNAG_05377	ITR3	myo-inositol transporter, putative	50	35	27	80	103	113	0.00207025	1.29557	0.000113145	14.9036	2.45473	2.68398
CNAG_03420	-	Gly-Xaa carboxypeptidase	1958	1722	1863	4856	5015	4650	8.97e-41	1.28247	1.57e-43	191.41	2.43256	40.0474
CNAG_04331	-	hypothetical protein	22	18	21	56	47	56	0.0184558	1.2792	0.00161832	9.93879	2.42704	1.73387
CNAG_04887	-	hypothetical protein	254	200	231	516	700	550	1.76e-12	1.25513	1.32e-14	59.3469	2.38689	11.755
CNAG_06331	-	hypothetical protein	152	114	234	354	397	527	3.71241e-05	1.24732	1.05684e-06	23.8217	2.37401	4.43034
CNAG_00532	-	hypothetical protein	2638	1893	2209	5602	6400	5069	4.98e-20	1.23416	1.87e-22	95.0334	2.35245	19.3029
CNAG_03916	-	glucose-6-phosphate isomerase	37443	34693	36676	85665	96218	87188	3.75e-50	1.19694	4.53e-53	235.133	2.29253	49.4262
CNAG_02924	-	histone H1/5	1130	905	1085	2514	2485	2658	1.07e-22	1.19061	3.59e-25	107.426	2.28249	21.9707
CNAG_03475	-	hypothetical protein	2471	2108	2394	5191	5761	5982	1.59e-29	1.17269	4.48e-32	138.967	2.25432	28.7991
CNAG_06529	-	hypothetical protein	40	38	45	103	94	99	0.0018039	1.161	9.71348e-05	15.1916	2.23613	2.74379
[truncated: 19 more rows]

## Sheet: Genes dowregulated by EZT2oe
Supplementary Data 2. RNA sequencing data for transcriptome analysis of EZT1, EZT2, or CBF1 overexpression strains compared with the wild-type strain.
[truncated: 62 more rows]

[truncated: 4 more sheets: Complete dataset for EZT2oe, Genes upregulated by CBF1oe, Genes dowregulated by CBF1oe, Complete dataset for CBF1oe]
